## Binocular Mirror-Symmetric Microsaccadic Sampling of Hyperacute 3D-Vision

Joni Kemppainen<sup>1†</sup>, Ben Scales<sup>1†</sup>, Keivan Razban Haghghi<sup>1†</sup>, Jouni Takalo<sup>1†</sup>, Neveen Mansour<sup>1</sup>, James McManus<sup>1</sup>, Gabor Leko<sup>3</sup>, Paulus Saari<sup>4</sup>, James Hurcomb<sup>1</sup>, Andra Antohi<sup>1</sup>, Jussi-Petteri Suuronen<sup>5,6</sup>, Florence Blanchard<sup>1</sup>, Roger C. Hardie<sup>7</sup>, Zhuoyi Song<sup>1,8</sup>, Mark Hampton<sup>9</sup>, Marina Eckermann<sup>10,11</sup>, Fabian Westermeier<sup>10</sup>, Jasper Frohn<sup>10,11</sup>, Hugo Hoekstra<sup>12</sup>, Chi-Hon Lee<sup>13</sup>, Marko Huttula<sup>4</sup>, Rajmund Mokso<sup>14\*</sup>, Mikko Juusola<sup>1,2\*†</sup>

<sup>1</sup>Department of Biomedical Science, University of Sheffield, Sheffield S10 T2N, UK.

<sup>2</sup>National Key Laboratory of Cognitive Neuroscience and Learning, Beijing, Beijing Normal University, Beijing 100875, China.

<sup>3</sup>Department of Image Processing and Computer Graphics, University of Szeged, H-6701 Szeged, Hungary.

<sup>4</sup>Nano and Molecular Systems, University of Oulu, Oulu FIN-90041, Finland.

<sup>5</sup>ESRF - The European Synchrotron, 38043 Grenoble, France.

<sup>6</sup>Xploraytion GmbH, Bismarckstrasse 10-12, D-10625, Berlin, Germany.

<sup>7</sup>Department of Physiology Development and Neuroscience, Cambridge University, Cambridge CB2 3EG, UK.

<sup>8</sup>Institute of Science and Technology for Brain-Inspired Intelligence, Fudan University, Shanghai, 200433, China.

<sup>9</sup>AMRC -The University of Sheffield Advanced Manufacturing Research Centre, Sheffield S9 1ZA, UK.

<sup>10</sup>Deutsches Elektronen-Synchrotron, DESY, 22607 Hamburg, Germany.

<sup>11</sup>Institut für Röntgenphysik, Georg-August-Universität Göttingen, 37077 Göttingen, Germany.

<sup>12</sup>Faculty of Electrical Engineering, Mathematics and Computer Science, University of Twente, UT7522 NB Enschede, The Netherlands.

<sup>13</sup>ICOB, Academia Sinica, Taipei 11529, Taiwan.

<sup>14</sup>MAX IV Laboratory, Lund University, SE-221 00 Lund, Sweden.

\*To whom correspondence should be addressed: [m.juusola@sheffield.ac.uk](mailto:m.juusola@sheffield.ac.uk) or [rajmund.mokso@maxiv.lu.se](mailto:rajmund.mokso@maxiv.lu.se).

†These authors contributed equally to this work.

**Abstract:** Neural mechanisms behind stereopsis, which requires simultaneous disparity inputs from two eyes, have remained mysterious. Here we show how ultrafast mirror-symmetric photomechanical contractions in the frontal forward-facing left and right eye photoreceptors give *Drosophila* super-resolution 3D-vision. By interlinking multiscale *in vivo* assays with multiscale simulations, we reveal how these photoreceptor microsaccades - by verging, diverging and narrowing the eyes' overlapping receptive fields - channel depth information, as phasic binocular image motion disparity signals in time. We further show how peripherally, outside stereopsis,

microsaccadic sampling tracks a forward flying fly's optic flow field to better resolve the world in motion. These results change our understanding of how insect compound eyes work and suggest a general dynamic stereo-information sampling strategy for animals, robots and sensors.

**One Sentence Summary:** *Drosophila* use binocular mirror-symmetric photomechanical photoreceptor microsaccades to sample hyperacute depth-information.

Because the insect compound eyes are composed of rigid ommatidial lens systems, it was long believed that their inner workings would also be immobile (1, 2). However, underneath the *Drosophila* ommatidial lenses, photoreceptors rapidly contract and elongate photomechanically (3, 4), in and out of their focal plane and sideways in a sophisticated piston-motion, which rapidly adjusts their receptive field sizes and x,y-positions, improving acuity (4). But it has remained unclear how these microsaccades happen globally, across the left and right eye, and whether and how they could contribute to visual behaviors and stereo vision. To examine the global photoreceptor photomechanics in sub-micrometer spatial and  $\leq 10$  ms temporal resolution inside the compound eyes of intact living *Drosophila*, we performed *in vivo* X-ray imaging at ESRF (beamline ID16b) and DESY (beamline P10) synchrotrons (**Fig. 1A**; fig. S1).

### **X-rays evoke mirror-symmetric photoreceptor motion in the left and right eye**

We first imaged the compound eyes by brief (200-300 ms) high-intensity X-ray flashes (**Fig. 1B**; fig. S2), which would limit radiation damage, while simultaneously activating local photoreceptors by a white LED flash, to make them contract. Unexpectedly, however, we found that the X-rays alone could rapidly ( $\leq 10$  ms) activate every photoreceptor to contract in synchrony, causing them to sweep mirror-symmetrically inside the left and right eye in an opposing back-to-front vergence motion (**Fig. 1, C and D**; fig. S3; **Movie S1**). This global motion's size and speed increased broadly with X-ray intensity (**Fig. 1D**) and was large enough to conceal local photoreceptor contractions to the simultaneous LED test flashes. Velocity analyses further revealed that X-rays caused the strongest movements in the left and right eyes' forward-facing photoreceptor pairs with the longest light-sensitive parts, the rhabdomeres (5), where the photomechanical transduction occurs (3, 4) (**Fig. 1E**; Fig. S3E and F; **Movie S1**).

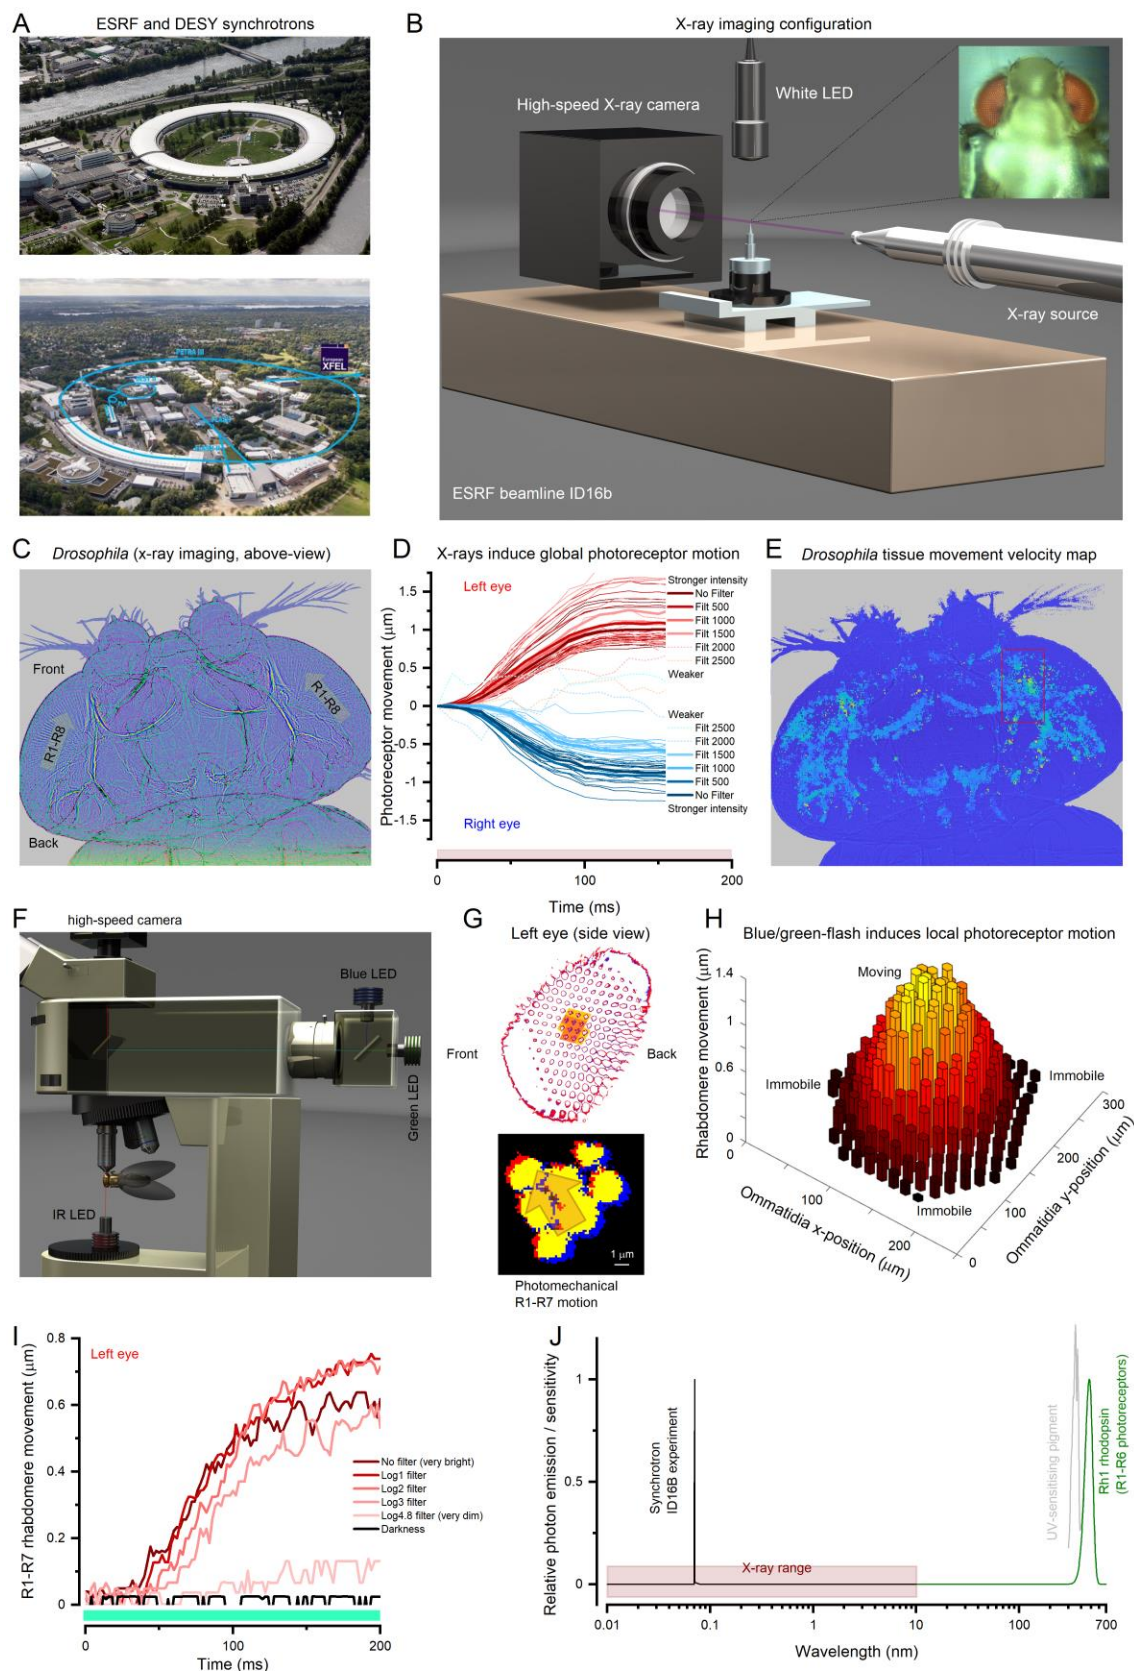

**Fig. 1. X-ray-imaging *Drosophila in vivo* reveals global mirror-symmetric right and left eye photoreceptor contraction dynamics that tie in with local photomechanical photoreceptor responses.** (A) Experiments were performed using ESRF (above) and DESY (below) synchrotrons; see fig. S7 to S9 about the method. (B) ESRF beamline ID16b imaging configuration, using 100 nm resolution. (C) X-rays evoked fast synchronized mirror-symmetric photoreceptor contractions inside the left and right eyes, causing the photoreceptors to sweep in global back-to-front vergence motion (arrows). (D) Photoreceptor movement began <10 ms from the X-ray onset, increasing with intensity until saturating. (E) The longest, frontal forward-facing photoreceptors (5) moved the fastest, ~15-20  $\mu\text{m/s}$ . (F) *In vivo* high-speed light-microscopy of R1-R7 rhabdomere photomechanics to blue-green flashes under deep-red antidromic illumination (740 nm LED + 720 nm long-pass edge filter), with a fly held in a pipette tip. (G) A 200 ms blue/green-flash, delivered orthodromically (through the microscope optics) into the left fly eye (above), excited local photoreceptors (orange highlight) to twitch photomechanically in a back-to-front direction (arrow). (H) Because rhabdomeres moved only in those ommatidia facing the incidental blue/green-flash from above and remained still in the other ommatidia (4), these movements did not involve intraocular muscles (6), which otherwise would have moved the whole retina uniformly (7). (I) Local blue/green-light-induced photoreceptor contraction dynamics (showing the corresponding early fast-phase) depended upon the light intensity and closely resembled those evoked by X-rays (D). (G and H) R1-R8 of one ommatidium contracted together as a unit if any of their R1-R8 alone saw light changes, indicating intraommatidial mechanical photoreceptor coupling/levering; see fig S30 and S31. (J) The experimental X-ray wavelength peak was ~6,900-times shorter than R1-R6 photoreceptors' peak wavelength sensitivity (~480 nm).

These movements were not caused by radiation- or heat-induced tissue swelling or damage, because immediately, as the X-ray stimulation was shut off in darkness, the photoreceptors stretched back to their original shapes within a second, enabling their contractions to be repeated for many minutes, sometimes  $\geq 30$  minutes. And crucially, the contractions stopped when the fly died and did not appear in freshly killed flies. Moreover, separate light-microscopy experiments through cornea-neutralized ommatidia (4) (**Fig. 1F**; fig. S29 to S31) revealed that, locally, photoreceptors contracted to 200 ms blue/green-flashes with comparable motion directions (**Fig. 1, G and C**), time course and intensity-dependence (**Fig. 1, H and D**), suggesting that X-rays and visible light elicited the contractions through the same mechanism. Interestingly, however, we further discovered that R1-R8 are mechanically coupled in an ommatidium: activating a single R1-R8 contracted its R1-R8 as a unit, while R1-R8s in neighboring ommatidia stayed still (**Fig 1, G to I**; fig. S30 and S31). Thus, the screening pigments around the ommatidia insulated the photoreceptors from non-incidental visible light contracting them, but not X-rays.

We hypothesized that sufficiently high X-ray photon densities could either activate phototransduction directly through rhodopsin photo-isomerization (8, 9) or release visible photons through Compton scattering from the heavier atoms inside the eye (10), for example, from phosphorus in the membrane phospholipids, or radiation phosphene (11). Such low-energy photons would then photo-isomerize rhodopsin molecules or be absorbed by ommatidial screening pigments, preventing light from leaving the eye. Thus, although the probability of an X-ray photon ( $\lambda_x \approx 0.07$  nm) activating a single rhodopsin-molecule (Rh1,  $\lambda_{\text{max}} \approx 330$  [UV-sensitizing pigment] and 480 nm [blue-green]) should be infinitesimal (**Fig. 1J**), by each photoreceptor having millions of rhodopsin-molecules and facing  $\sim 10^{6-8}$  X-ray photons in the synchrotron beam at each second,

rhodopsin photo-isomerizations – and the subsequent fast PIP<sub>2</sub> cleavage from the photoreceptor membrane, as the plausible mechanism of photoreceptor contractions (3) – may become unavoidable.

### **X-ray-activated phototransduction uncovers global R1-R8 microsaccade dynamics**

We tested this hypothesis *in vivo* by recording wild-type and blind mutant (*hdc*<sup>JK910</sup>, *norpA*<sup>P24</sup> and *trp/trpl*) flies' global electrical responses, so-called electroretinograms (ERGs), to 250 ms white-light and X-ray flashes (**Fig. 2**; fig. S4 to S6; **Movie S2**) at DESY beamline P10 (**Fig. 2A**). The experiments were performed by a remote-controlled LED stimulation/ERG recording system (**Fig. 2B**), synchronized with 100 fps high-speed X-ray imaging, after carefully positioning a recording microelectrode on the right eye and a reference electrode in the thorax and letting the flies dark-adapt for 1-2 minutes.

Wild-type white-light control ERGs (**Fig. 2C, i**) showed a typical negative-going photoreceptor component between On- and Off-transients from the postsynaptic interneurons (12), LMCs. Remarkably, the test ERGs to progressively intensified X-ray flashes (ii), recorded 20 s after, showed comparable dynamics, suggesting that X-rays activated phototransduction, causing an electrical photoreceptor signal and its synaptic transmission. The photoreceptor component increased with the X-ray intensity, consistent with normal elementary response (quantum bump) integration (4). For the two brightest X-ray flashes, this component was larger than the white-flash one, presumably because the X-rays activated every photoreceptor in the eye (global activation). In contrast, the white-LED activated mostly the photoreceptors directly facing it (local activation). Importantly, high-speed imaging (iii) showed that the X-ray-evoked photoreceptor contractions closely followed their ERG dynamics (**Movie S2**), supporting the direct phototransduction-activation hypothesis. The robust control ERGs (iv), recorded after the X-rays, implied that the eyes worked normally with little (or no) radiation damage.

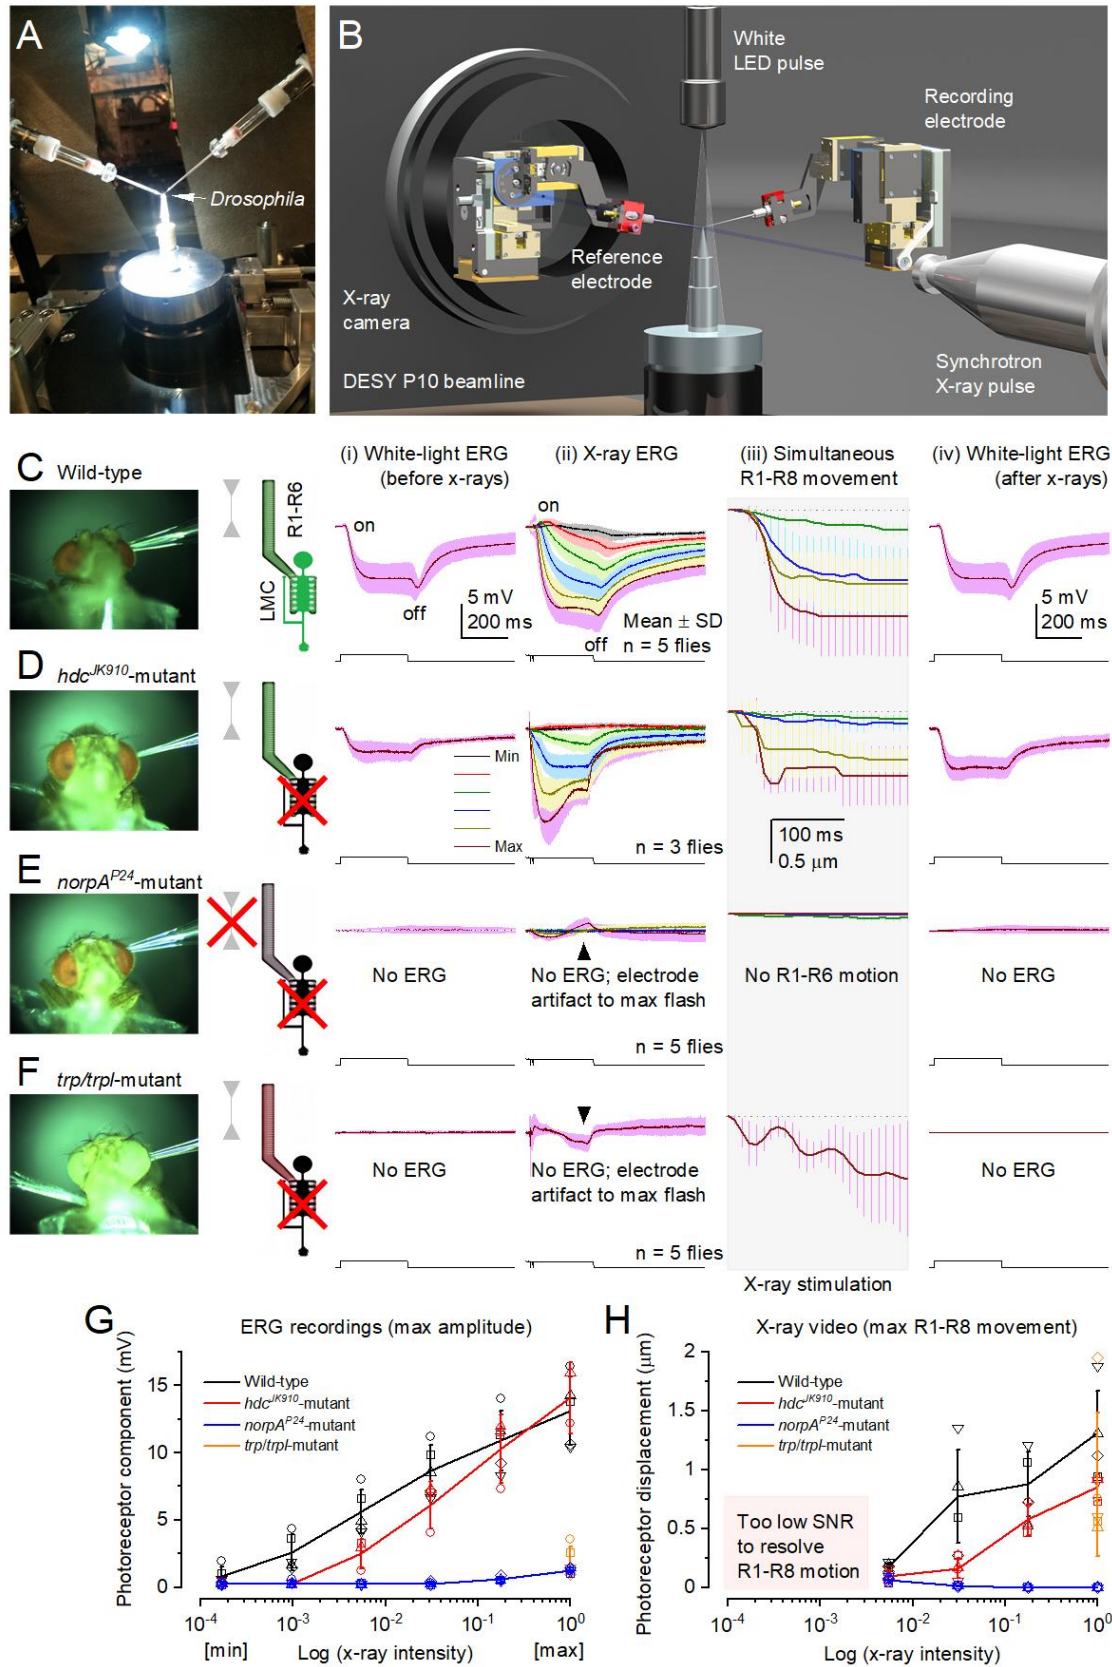

**Fig. 2. X-rays activate phototransduction.** (A) Remote-controlled stimulation and recording system for head-fixed *Drosophila*, including two piezo-micromanipulators, an ERG amplifier, and a white LED, fitted in DESY P10 beamline. (B) Microelectrodes recorded the fly eyes' combined response, electroretinogram (ERG), to white-light and X-ray flashes. (C) Wild-type ERGs to a white-light (i) and X-rays (ii) show on- and off-transients, indicating normal histaminergic synaptic transfer. Hyperpolarizing photoreceptor ERG component and (iii) R1-R8 photomechanical contraction increased with X-ray intensity. (iv) White-light ERG control recorded 20 s after the X-rays. (D) *hdc<sup>JK910</sup>*-mutant (i) white-light and (ii) X-ray ERGs lacked On- and Off-transients, indicating missing synaptic transfer. (ii) ERG photoreceptor component and (iii) R1-R8 photomechanics increased with X-ray intensity. (iv) *hdc<sup>JK910</sup>* white-light ERG control recorded 20 s later. (E) Blind *norpA<sup>P24</sup>*-mutants do not generate ERG responses or photomechanical photoreceptor contractions to white light or X-ray pulses. (F) Blind *trp/trpl*-mutants do not generate ERG responses while their photoreceptors contract photomechanically to white light or X-ray pulses. (C to F) In the R1-R6/LMC-cartoons, green indicates the normal function, gray R1-R6 no contraction, and the black LMC no synaptic output. (G) Wild-type and *hdc<sup>JK910</sup>* ERG photoreceptor components increased sigmoidally with X-ray intensity, while those of *norpA<sup>P24</sup>* and *trp/trpl* mutants did not respond. (H) Wild-type and *hdc<sup>JK910</sup>* photomechanical responses grew sigmoidally with X-ray intensity, while those of *norpA<sup>P24</sup>* mutants did not respond. The maximal X-ray-induced photoreceptor contraction in *trp/trpl* (orange) was comparable to the wild-type and *hdc<sup>JK910</sup>*. (G and H) The normalized maximum intensity corresponds to  $2.2 \times 10^6$  photons/s/ $\mu\text{m}^2$ .

*hdc<sup>JK910</sup>*-mutant ERGs (Fig. 2D) gave further evidence that visible light (i) and X-rays (ii) activated phototransduction analogously. Both types of stimuli evoked photoreceptor components but no On- and Off-transients, consistent with *hdc<sup>JK910</sup>*-photoreceptors' inability to synthesize neurotransmitter histamine and transmit visual information to LMCs and the brain (13). While the *hdc<sup>JK910</sup>*-phototransduction approximates wild-type (4, 13), histamine deficiency has been shown to cause an excitatory synaptic feedback overload from the lamina interneurons to R1-R6s, making *hdc<sup>JK910</sup>*-photoreceptors more depolarized with faster responses and reduced light-sensitivity in respect to the wild-type (13) (cf. Fig. 2D, i and iv to Fig. 2C, i and iv). Accordingly, and in further support of our hypothesis, we found both the *hdc<sup>JK910</sup>* X-ray ERG dynamics (Fig. 2D, ii) and photomechanical contractions (Fig. 2D, iii) faster and less sensitive than in the wild-type (Fig. 2C, ii-iii) over a broad intensity range (Fig. 2, G and H).

Conversely, *norpA<sup>P24</sup>*-mutants, in which faulty phospholipase-C molecules halt phototransduction PIP<sub>2</sub> activation (3), showed (Fig. 2E) neither clear electrical responses to visible light (i) or X-rays (ii), producing effectively flat no-change ERGs (bar the small electrode charging artifacts), nor reacted photomechanically (iii) over the test intensity range (Fig. 2, G to H). Although similar “zero-response” controls were recorded from freshly killed flies (by freezing; fig. S5C), concurrent X-ray imaging revealed that *norpA<sup>P24</sup>*-mutants were alive and active during the stimulation, seen by their antennal movements and intrinsic muscle activity. Thus, these results validated that the wild-type (Fig. 2C) and *hdc<sup>JK910</sup>* X-ray responses (Fig. 2D) were not caused by tissue shrinkage/damage/movement artifacts but resulted from phototransduction activation.

Finally, we used *trp/trpl*-mutants (Fig. 2F), which can respond photomechanically to light flashes by cleaving PIP<sub>2</sub> from the plasma membrane (3) but not electrically because they lack the light-gated ion channels, in which openings are needed for generating electrical responses and synaptic

signaling. Thus, these mutants provided a decisive test of whether the X-ray-induced photoreceptor movements (**Fig. 1, Fig. 2, A to E**) were photomechanical. However, owing to their minutes-long light recovery time (4), we used only one bright X-ray intensity. We found that *trp/trpl*-mutants neither responded electrically to white-light (i and iv) nor X-ray flashes (ii), but their photoreceptors contracted strongly both to X-rays (iii) and visible light (3, 4), confirming the movements photomechanical. And whilst, after contracting ~40-50 ms, their dynamics showed characteristic oscillations (4), these were unrelated to missing eye-muscle activation. This is because, in the head-fixed wild-type flies, the local photoreceptor activation (**Fig. 1F**) did not trigger intraocular muscle contractions (**Fig. 1G**; fig. S30 and S31), and yet their local and global photomechanics matched (*cf.* **Fig 2C to Fig. 1, D and H**). Therefore, the *trp/trpl*-oscillations more likely reflected suboptimal  $Ca^{2+}$ -dynamics [missing  $Ca^{2+}$ -influx], mechanical damping/anchoring or both.

These results (**Fig. 1 and 2**) showed that a *Drosophila* photoreceptor responds to both X-rays and visible light but with different probabilities and that the synchrotron-based X-ray imaging activates all photoreceptors inside the left and right eye at once, revealing their photomechanical mirror-symmetric motion dynamics (**Movie S1 and S2**), hidden from the outside view. Interestingly, these global R1-R8 microsaccade dynamics suggest that when experiencing contrast variations in natural scenes, the two eyes' frontal forward-facing photoreceptor pairs, which are ~400  $\mu\text{m}$  apart but should have overlapping receptive fields (RFs), would scan over the same small visual area in opposing but synchronized vergence motion. We, therefore, next asked whether the frontal photoreceptors sample the world in this way?

### Left and right eye photoreceptor receptive fields move mirror-symmetrically

To answer this question, we built a head-centered goniometric 2-axis rotation stage with an integrated microscope/high-speed camera system for targeted rhabdomere light stimulation and motion capture (**Fig. 3A**; fig. S10). This device allowed us to measure a head-fixed *Drosophila*'s photoreceptor rhabdomeres' x,y-positions *in situ* (**Fig. 3, B to D**; fig. S11 and S12), as visualized by their virtual images, so-called deep-pseudopupils (14), to antidromic infra-red illumination ( $\geq 820$  nm, propagating through its head/eyes), which the flies cannot see (4, 15). Moreover, to capture their photomechanical contractions (**Fig. 3E and F**), the rhabdomeres could be stimulated orthodromically, through the ommatidial lens system, with light flashes presented at their RFs.

We first identified those frontal photoreceptors in the left and right eye, which had overlapping RFs (**Fig. 3B**; fig. S13 and S14) by systematically mapping their x,y-positions (**Fig. 3C**) with head-centric fine-rotations (0.35° step; **Movie S3**). These measurements revealed the eyes' stereoscopic layout, where owing to the eyes' optical superposition design (14, 16), a single point in space frontally is seen at least by 16 photoreceptors; the R1-R8 super-positioned in the left eye and the R1-R8 super-positioned in the right eye (**Fig. 3, B and C**). We further mapped how R1-R8 rhabdomeres, as attained by the deep pseudopupil images, were systematically rotated during development for each eye location while retaining optical superposition with the changing eye curvature. This scanning revealed the left and right eyes' highly-ordered mirror-symmetric R1-R8 angular orientation maps, with equatorial mirror-symmetry (14) between the eyes' upper and lower halves (fig. S11 and S12).



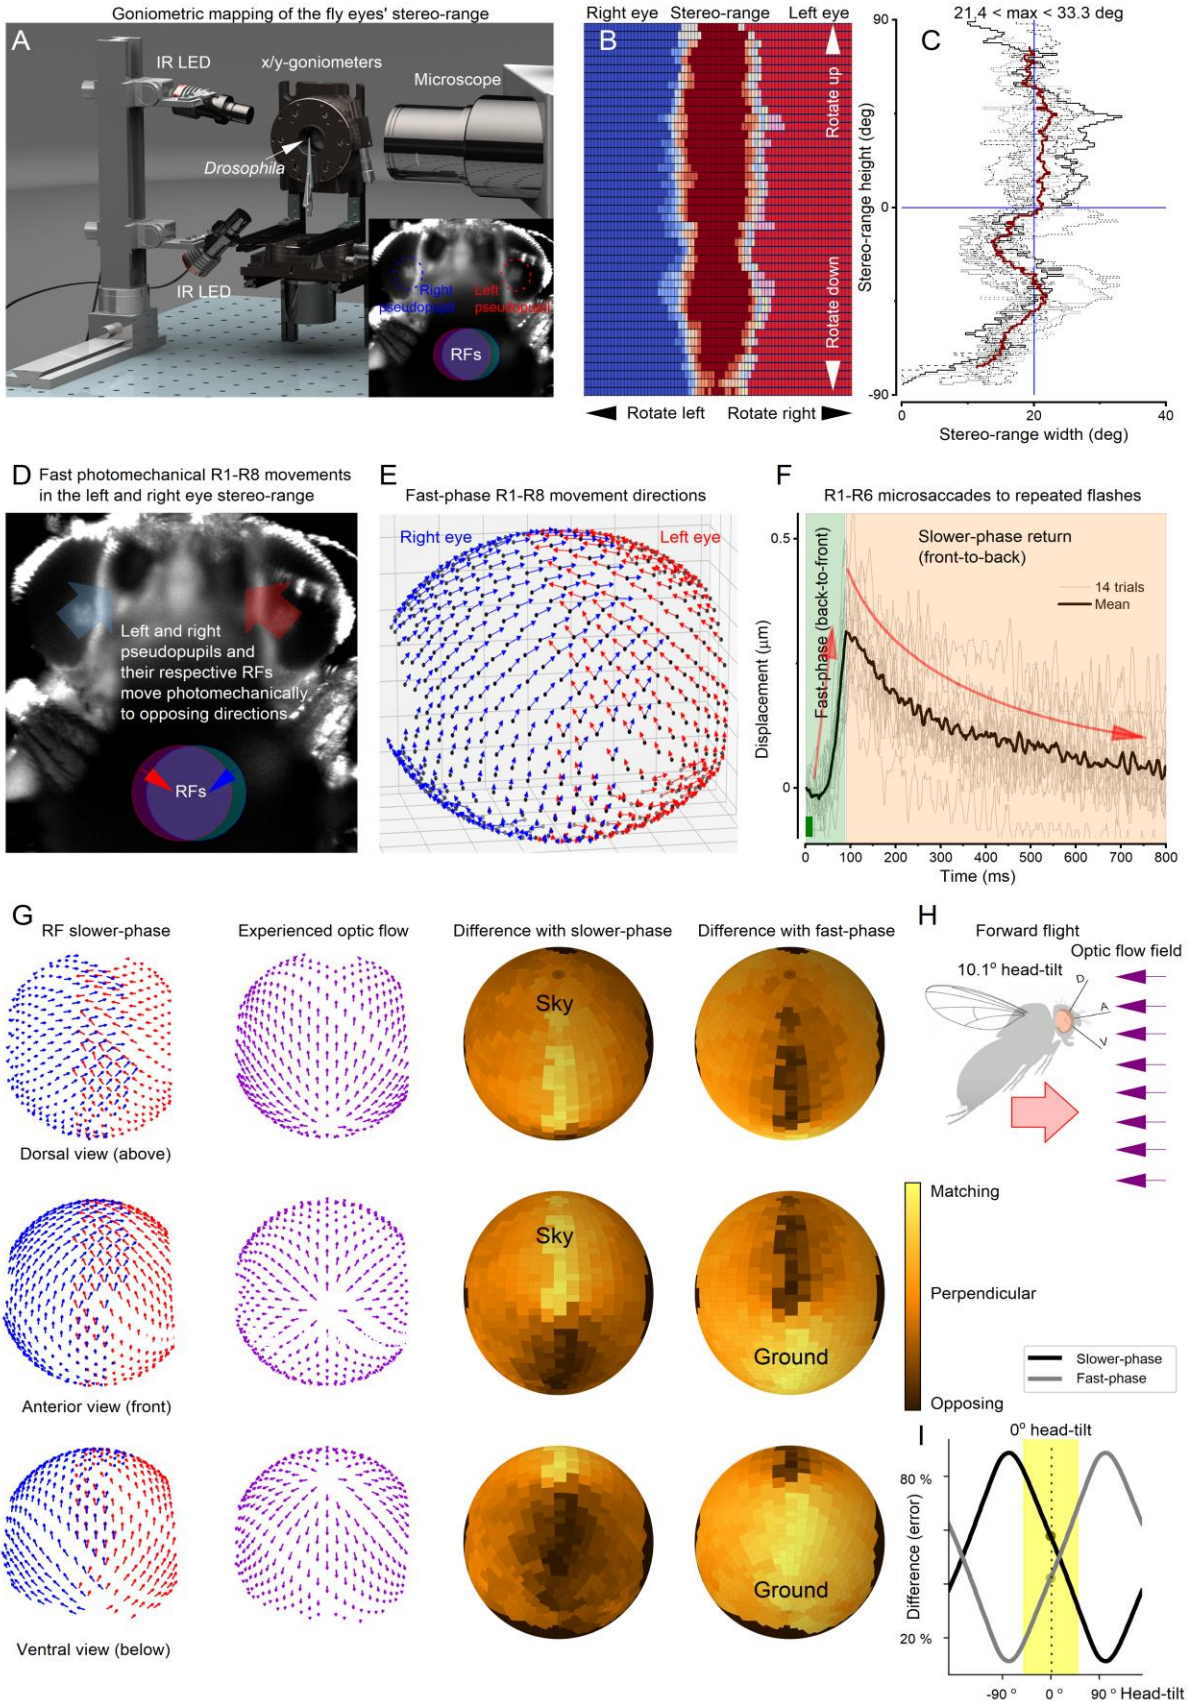

**Fig. 3. Left and right eye photoreceptor receptive fields (RFs) overlap frontally and move mirror-symmetrically, tracing optic flow.** (A) A high-speed imaging system with motorized x,y-goniometers was used to map binocular photoreceptors with overlapping RFs. Insert: Infra-red (IR) back-lit R1-R7 photoreceptor rhabdomeres, which form the left and right eye deep-pseudopupils (*14*) (circled), magnified ~10-fold by the ommatidial lenses. Each eye's pseudopupil shows rhabdomeres from neighboring ommatidia that collect light from overlapping RFs (neural superposition). (B) By rotating the fly head through its central x,y-axes revealed the binocular deep-pseudopupils' stereoscopic visual field (vine color); see **Movie S3**. (C) The frontal left and right eye photoreceptors see in stereo ~23.5° horizontally and ~180° vertically. These photoreceptor pairs could enable depth perception. (D) Ommatidial lenses invert the left and right eyes' fast up-medially-recoiling microsaccades (deep-pseudopupil movement fast-phase; big arrows), as evoked by a 10-ms light flash within their overlapping RFs, to sweep their respective RFs down-laterally (small arrows). (E) Microsaccade fast-phase directions mapped across the left (red) and right (blue) eyes; slower-phase return in the opposite direction (cf. **Movie S4**; mean of 5 flies). (F) Brightening (10 ms sub-saturating light-flash) contracts R1-R8 front-to-back (fast-phase), and darkening returns them back-to-front (slower-phase); their RFs move in the opposite directions. The mean (black) and 14 consecutive R1-R6 contractions (light-grey), recorded after pre-light-adaptation through a cornea-neutralized optics (cf. **Fig. 1G**); see fig. S21 and S22 for the fully light-adapted dynamics (**Movie S5**). (G) The corresponding slower-phase RF vector map (left) compared to forward flying fly's optic flow field (center), as experienced with the fly-head upright. Their difference (error) is shown for the slower- and fast-phases. The fast-phase matches the "ground-flow", the slower-phase the "sky-flow". (H) By adjusting microsaccadic sampling to optic flow through head-tilt, a fly can actively keep the passing world longer within its photoreceptors' RFs, which theoretically (4) should improve acuity to resolve the world in motion; see **Movie S6**. D, dorsal; a, anterior; v, ventral viewpoints. (I) Upright (0°) head, and normal tilting around this position (yellow), keeps RFs' fast- and slower-phases in a balanced push-pull sampling state. Optimizing vision for specific flying and walking behaviors, like object tracking, requires further adjustments by head and body movements (**Movie S7**; fig. S23 to S25).

Next, we analyzed the rhabdomeres' photomechanical movement directions to UV- or green-light flashes (**Fig. 3D**; fig. S15 to S28), as delivered at their RFs (**Movie S4**). The resulting deep-pseudopupil microsaccades were then translated to a 3D-vector map (**Fig. 3E**), covering the frontal stereo section and more peripheral parts of the eyes. Expectedly, the left (red) and right (blue) eye microsaccades were mirror-symmetric. But crucially, by comparing these movement maps to the deep pseudopupil angular orientation maps for each eye location (fig. S12), we found that the local microsaccades occurred along their R1-R2-R3 photoreceptors' rotation axis, implying that their sideways-movement directions were hardwired during development. Moreover, because the deep-pseudopupils are virtual images (*17*), which are magnified but not inverted by the ommatidial lens system (**Movie S4**; fig. S16 and S17), the rhabdomeres inside the eyes recoiled accordingly (**Fig. 3F**); first bouncing along their location-specific back-to-front directions (fast-phase) before returning front-to-back (slower-phase), consistent with the X-ray imaged photoreceptors movements (**Fig. 1C**). Therefore, during the light stimulation, the corresponding photoreceptor RFs - inverted by the ommatidial lenses (4) - scan the visual world with the same two phases but in the opposite directions (**Fig. 3D**).

Remarkably, the global 3D-vector-map of photoreceptors' photomechanical RF-movement directions (**Fig. 3G**; red and blue arrows; fig. S23) sweep along a forward flying/walking fly's optic flow-field (purple arrows), which radiates from a focus at its apparent destination, curving

around its left and right eyes. Their difference maps (yellow-matching; black-opposing) are shown for a characteristic upright head-position (**Fig. 3H**) for both the fast- and slower-phase. Generally, the fast-phase is in the flow-field direction and the slower-phase in the opposite direction (**Movie S6**). But keeping the head upright sets the RFs' fast- and slower-phases in a balanced mid-state (**Fig. 3I**), where the fast-phase matches the “ground-flow” and the slower-phase the “sky-flow” (**Fig. 3G**). However, locomotion amongst real-world structures (18) would further burstify sampling (4) in a push-pull manner (**Fig. 3F**). Across the eyes, photoreceptors inside each ommatidium would uniquely and orderly ripple between the phases, as incident light-increments drive their RFs fast backward and light-decrement slower forwards, with some moving patterns thus staying longer than others within an RF; which should improve their neural resolvability/detection in time (4). Thus, the fast ventral components may improve resolving complex visual clutter, and the slow dorsal components the landscape and clouds in the skyline. Rotation (yaw) further enhances binocular contrasts (4), with one eye's fast- and slower phases moving with and against their rotation, respectively, while simultaneously the other eye's phases do the reverse (**Movie S7**; fig. S23 to S25).

Since the microsaccades of the synaptically-decoupled *hdc<sup>JK910</sup>* photoreceptors (13) followed the wild-type- trajectories (fig. S20), as set by their rhabdomeres' matching anatomical orientations (fig. S11 and S12), and the different spectral photoreceptor classes' microsaccades summed up similar to their ERG responses (fig. S26 to S28; Table S2 to S5), the observed dynamics did not involve intraocular muscles, validating the X-ray data (**Fig. 2**). These results show that microsaccadic sampling along the local small-field motion axes initiates optic-flow processing (19) and suggest that such sampling and locomotion behaviors have jointly adapted to the physical world order to maximize visual information.

## L2-interneurons' hyperacute motion sensitivity tracks microsaccade directions

To test directly whether the optic-flow-tuned microsaccadic sampling improved acuity of moving stimuli directionally, as suggested experimentally (**Fig. 3, E to G**) and predicted theoretically (4), we recorded neural responses of specific LMCs, L2-interneurons (**Fig. 4**; fig. S33 to S41), to moving bars and panoramic black-and-white gratings, in which resolution, velocity and direction were changed systematically.

These recordings were primarily done in so-called UV-flies (15), using a bespoke two-photon  $\text{Ca}^{2+}$ -imaging system (**Fig. 4, A and B**), while presenting UV-stimuli in an ultra-fine spatiotemporal resolution to a fly walking on a track-ball (fig. S33 and S34). R1-R6 photoreceptors of UV-flies express only Rh3 (UV-rhodopsin), and therefore see ultraviolet but not green (15), while their L2-neurons express the green-fluorescent  $\text{Ca}^{2+}$ -reporter GCaMP6f. Critically, UV-flies show normal photomechanical microsaccades (fig. S32) and, as their L2 green-fluorescence  $\text{Ca}^{2+}$ -responses cannot activate the UV-sensitive R1-R6s through orthodromic green-light-transmission (15), they enable naturalistic low-noise conditions for recording high-precision neural signals (**Fig. 4, C and D**). Even so, the wild-type-eye L2-GCaMP6f-controls'  $\text{Ca}^{2+}$ -responses showed consistently similar general dynamics, and thus both results were pooled (**Fig. 4E**).

We found that L2-neurons robustly respond to hyperacute  $1\text{-}4^\circ$  moving gratings with location-specific velocity and motion direction sensitivities (**Fig. 4, C to E**; fig. S35 and S36, **Movie S8**). Thus, by encoding spatial information in time, akin to photoreceptors (4), L2s can transmit finer image details than the compound eye's optical limit,  $4.5^\circ$  interommatidial angle (5) (**Fig. 4F**; fig.

S35C), improving vision. Moreover, the angular maximum of L2 response acuity shifted systematically between neighboring medulla terminals (**Fig. 4, G to I**; fig. S37 and S38), showing that optic flow information was translated to visual orientation sensitivity at the medulla input layer. Crucially, the L2-terminals' motion-sensitivity map was essentially co-linear to the photoreceptor microsaccade direction map (**Fig. 4, H and I**; fig. S39), indicating angular conservation of synaptic information from R1-R6 to L2 (off-channel) LMCs, consistent with preserving the downstream optic flow processing (19). Future experiments need to test whether this is also true for L1 (on-channel) and L3 (20-22) LMCs, as asymmetric microanatomical adaptations (23-25) may further influence local motion computations.

These results demonstrate that L2s collectively convey a high-resolution neural representation of the moving world, maximizing visual information flow (**Fig. 3E**).

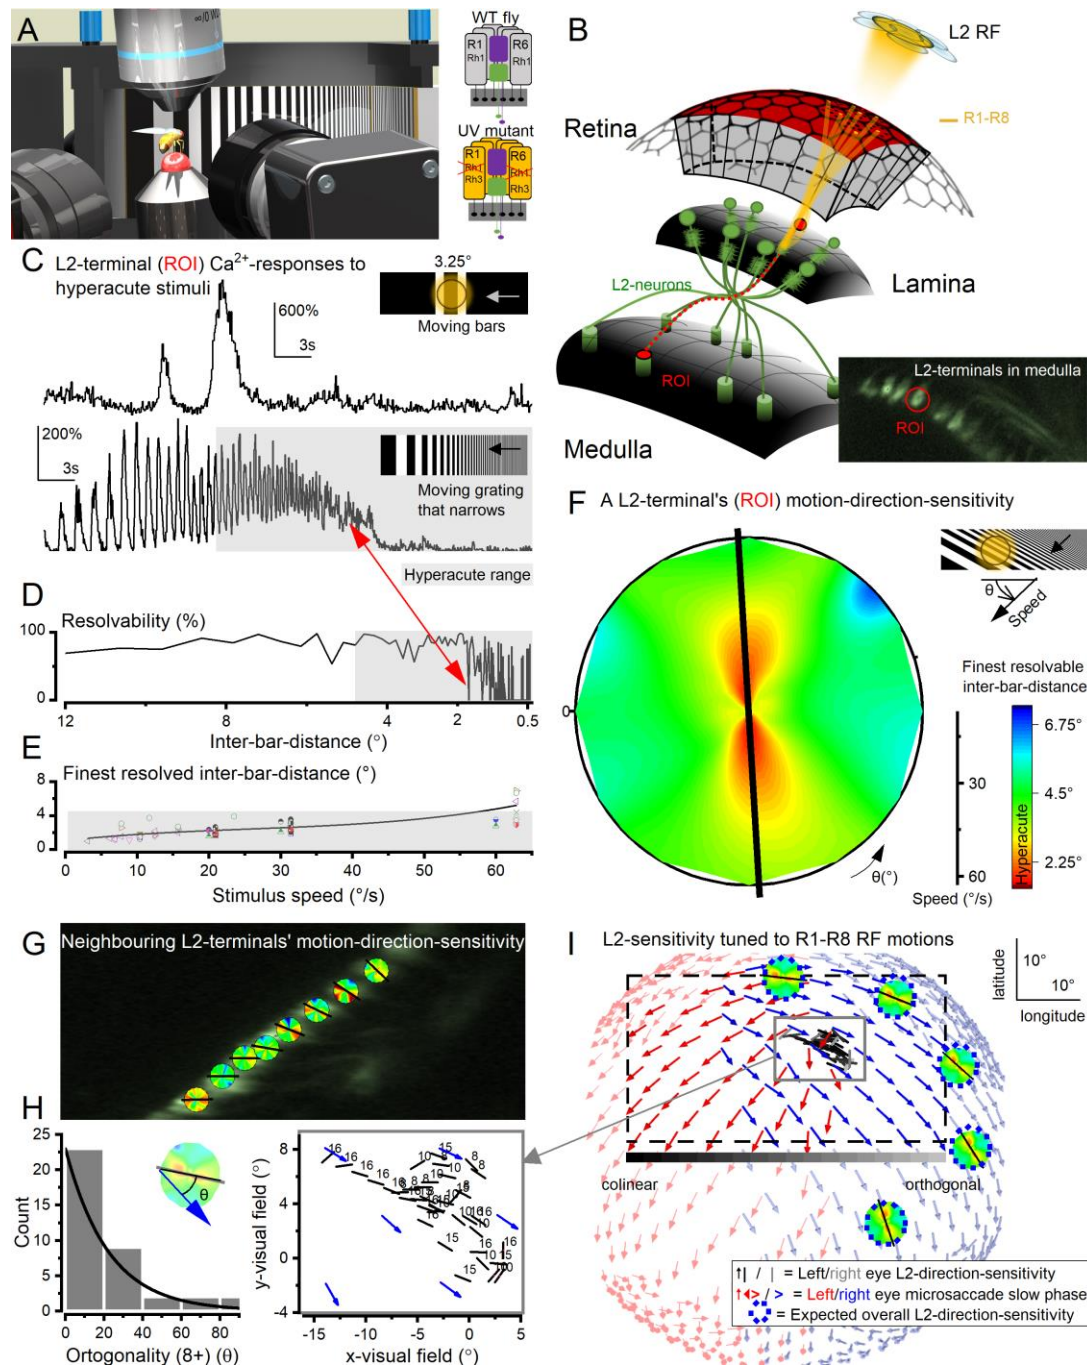

**Fig. 4. Hyperacute L2-terminal sensitivity follows microsaccade directions.** (A) A UV-fly saw ultrafine UV-stimuli on a  $150^{\circ} \times 50^{\circ}$  fiberoptic-screen with  $\sim 0.5^{\circ}$ -pixel-resolution, 38 mm from its eyes, while its L2-neurons' GCaMP6f-fluorescence changes ( $Ca^{2+}$ -responses) were recorded by high-speed 2-photon imaging. In UV-flies (15), UV-sensitive Rh3-opsin is expressed in R1-R6s, containing nonfunctional Rh1-opsin (*ninaE<sup>8</sup>*). (B) Each L2 receptive field (RF) samples information from six optically superimposed R1-R6 RFs. L2-retinotopy through axonal crossing: distal lamina L2s projects terminals to the frontal medulla. Inset: single L2-terminal  $Ca^{2+}$ -fluorescence responses to UV-stimulation were analyzed as regions of interest, ROI (red). (C) L2-terminal responses resolve in time hyperacute moving bars (here, showing a larger 2<sup>nd</sup>-bar

response) and black-and-white gratings (inter-bar-distance  $<4.5^\circ$ , grey), crossing their RFs, over a broad range of orientations and velocities. **(D)** L2-resolvability for a dynamically narrowing grating, moving  $20.9^\circ/s$ . Red-arrow indicates the finest resolvable angle (inter-bar-distance; as a rounded-up conservative estimate). **(E)** Inter-bar-distance-resolvability depends on stimulus velocity. L2s' GCaMP6f-readout resolved hyperacute patterns moving  $60^\circ/s$ . Note, the finest L2-resolvability,  $\sim 1.09^\circ$ , approaches the visual display's 2-pixel limit ( $\sim 0.5^\circ$  pixels) and that L2 voltage can encode even faster/finer inputs (15, 26-29). **(F)** An L2-terminal's motion-direction-sensitivity map is broadly hyperacute, here primarily along the vertical axis. It shows the finest resolvable inter-bar-distances to a dynamically narrowing moving grating stimulus (c-e), covering  $360^\circ$  directions at different speeds. **(G)** Neighboring L2-terminals show a gradual shift in their dominant motion-direction sensitivity (black arrows; see Supplement X for analytical details). **(H)** *Drosophila*'s combined L2-terminal motion-direction sensitivity map for the tested left eye region shows retinotopic organization (left,  $n = 4$  flies), mainly co-linear to the corresponding left eye microsaccade directions (right, cf. **Fig 3E**). **(I)** Eye-location-specific L2-terminal direction-sensitivities map R1-R8 microsaccade directions. Meaning, L2-terminals collectively generate a high-resolution neural representation of the moving world, maximizing visual information transfer during forward locomotion. The dotted rectangle specifies the visual area covered by the display screen.

### **Binocular microsaccades provide hyperacute depth information**

By comparing two neural images generated by the left and right eye forward-facing photoreceptors, a fly may extract depth information from the corresponding left and right RF pairs' ("pixels") x,y-coordinate differences. This disparity,  $d$ , is inversely related to the scene depth,  $z$  (**Fig. 5A**; **Movie S9**). By applying ray tracing from the ommatidial lenses to the world (fig. S42 to S56), with parameters taken from their rhabdomere Fourier-transform-beam-propagation simulations (30) and 100-nm-resolution X-ray-imaging (**Fig. 1**), we first estimated how the corresponding RFs at varying distances from the eyes, and their combined visual field, would look like if the photoreceptors were immobile (**Fig. 5B**).

Static case: the mirror-symmetric sampling array of the paired left and right-eye ommatidia (**Fig. 5C**), in which each R1-R7/8 rhabdomere is a different size (4) and distance (16) from the ommatidium center (fig. S45 and S49), leads to overlapping RF tiling over the frontal stereo field (**Fig. 5B**; Table S1 and S6). Each eye's spatial sampling matrix is further densified by the neural superposition signal pooling between seven neighboring ommatidia, in which R1-R7/8s' RFs of different sizes stack up unevenly (fig. S52 and S53). This massively overcomplete sampling array greatly differs from the classically considered organization (1, 2), where each ommatidium was considered a sampling point, or a pixel, with a *Drosophila* seeing the world through  $\sim 880$  such "pixels"; giving poor spatial resolution with marginal stereopsis. In contrast, our simulations, using the real R1-R7/8 rhabdomere spacing and sizes (**Fig. 1 to 3**), imply that its left and right eyes' RF overlap disparity could accentuate frontal resolvability and stereo vision.

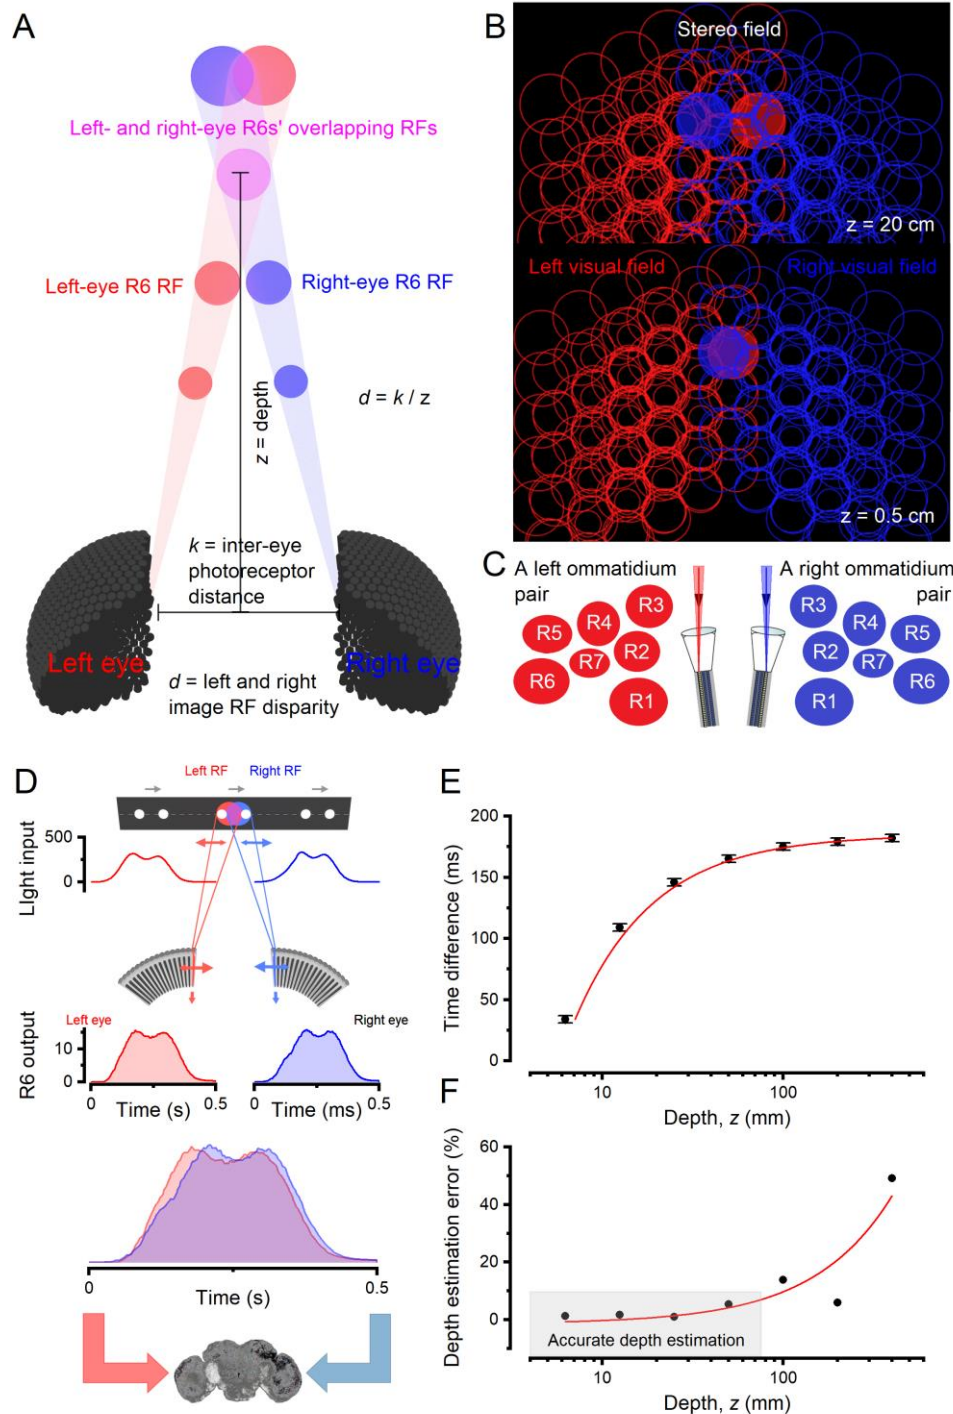

**Fig. 5. Forward-facing binocular photoreceptors' biophysically realistic multiscale modeling predicts phasic motion disparity for hyperacute stereopsis.** (A) With the corresponding left- and right-eye photoreceptors being a fixed distance,  $k$ , apart, their receptive field (RF) disparities inform about the object depth,  $z$ . (B) R1-R8's beam-traced (30) RFs (half-width circular cuts of broadly bell-shaped functions; right-eye, blue; left-eye, red) tile the fly's visual fields over-completely; shown at virtual planes 20 and 0.5 cm depths from the eyes. (C) R1-R7/8 rhabdomeres of each paired left and right ommatidia lay mirror-symmetrically (cf. **Movie S3** and **S9**). Because

rhabdomeres are different sizes (4) and distances away (16) from the ommatidium center, so too are their projected RFs (B). Therefore, in the neural superposition pooling, the resultant R1-R7/8 RFs do not overlay perfectly into one 4.5°-“pixel” (classic view), but instead tile over-completely each small area in the eyes’ visual fields. (D) Phasic voltage response differences of binocularly paired photoreceptors enhance object resolvability in time and carry information about the object depth,  $z$ , to the fly brain. Two dots, 3.5° apart moving left-to-right at 50°/s, cross binocular RFs of the corresponding left and right R6s 25 mm away. The resulting mirror-symmetric photomechanical microsaccades make the RFs move along (right R6) and against (left R6) the passing dots, shaping their light inputs and voltage outputs (Movie S10). (E) The proposed binocular mirror-symmetric microsaccadic sampling model (fig. S54) translates monotonically the depth of a moving object into distance in neural time; the closer the object to the fly eyes, the shorter the time difference between the responses. Error bars indicate stochastic jitter. (F) The model predicts that *Drosophila* cannot estimate accurately the depth of more distant objects; the error >10% when an object is >7 cm from the fly eyes.

But how would the frontal RFs and their neural responses change during photomechanical microsaccades? Furthermore, given that these are left-right mirror-symmetric (Fig. 1 to 4), could their phase differences to rotation be exploited for dynamic triangulation (Fig. 5A) to extract depth information in time about the real-world distances and relative positions?

Dynamic case: to simulate how the *Drosophila* left (red) and right (blue) eyes probably see left-to-right moving objects, we set their frontal photoreceptors in their respective model matrixes to contract mirror-symmetrically to light changes (Fig. 5D; two left-to-right moving dots) along with the measured dynamics (Fig. 3; fig. S21 and S50). These caused their respective RFs (red and blue disks) to narrow and slide in and out of each other in opposing directions, phasically shaping their neural responses (fig. S51 to S56; Movie S10), as calculated by biophysically realistic *Drosophila* photoreceptor models (fig. S48 to S50) (4, 31, 32). The responses for the left RFs, which moved against the object motion, rose and fell earlier than the responses for the right RFs, which moved along the objects and so had more time to resolve their light changes. Such phase differences in time broadly correspond to the case where similar but not identical images are sequentially presented to each eye, allowing one to perceive the 3D space.

Importantly, R1-R8s’ size-differing, moving, narrowing, and partially overlapping RFs, with stochastic R7/R8 rhodopsin-choices (33) and R1-R6 microstructural/synaptic variations (4, 23), make the retinal sampling matrix stochastically heterogeneous (fig. S52 and S56). This eliminates spatiotemporal aliasing in early neural images (4). Therefore, theoretically, this dynamic sampling can reliably feed the fly brain with 3D hyperacute information flow. In the centers interlinking the binocular inputs (34), such as the lobula complex (35-37) (fig. S57 to S60), the distance of an object crossing the corresponding left and right eye photoreceptor RFs could then be represented as distance in time (Fig. 5E; fig. S54). To velocity-normalize these distance estimates, their corresponding response waveforms could be correlated with those of their near neighbors (fig. S54; Movie S10). These results imply that neural motion- and depth-computations innately mix, as they share the same input elements, being consistent with the neurons of the motion detection channels serving vision and behaviors more broadly (34, 38) than just specific reductionist ideals.

## Visual behavior confirms frontal hyperacute stereopsis



To test whether *Drosophila* possesses super-resolution stereo vision, as our theory (**Fig. 5**; fig. S54) predicts, we performed visual salience (fig. S67 and S68; Table S7 to S10) and learning experiments (fig. S70 to S75; Table S11 to S19) with hyperacute 3D- and 2D-objects in a flight simulator system (**Fig. 6**). This apparatus was designed so that a tethered fly had no monocular cues to construct 3D representations of the objects neurally, without optically distorting its perception (fig. S66). In nature, a flying fly typically keeps an object of interest in its frontal view, fixating to it by small side-to-side head/body rotations. Such movements, by modulating light input and thus mirror-symmetric microsaccades at the binocular eye regions, should accentuate 3D-perception (**Fig. 5**). But conversely, given the photoreceptor RF dynamics and binocular separation, 3D-perception must diminish with increasing distance, as sampling uncertainties increase, predicting ~3-70 mm hyperacute stereo-range (**Fig. 5E**; fig. S54). Therefore, we presented stimuli 25 mm from the eyes, well within this range.

In salience experiments, a tethered flying fly explored a white panoramic scene, which had a small (4-mm-long) black hyperacute (*i.e.*,  $<4.5^\circ$  interommatidial pixelation (5)) 3D-pin, protruding from a small black dot ( $3.9^\circ \text{Ø}$ ), and two similar-sized black 2D-dots, each  $90^\circ$  apart (**Fig. 6, A to C**). The pin-position was varied for three trials, and the fourth (control) was a blank scene, presented in random order. For each trial, we measured a fly's fixation behavior: how much time it kept each part of the scene at the frontal view, given as probability. The old theory (1, 2) states that because all these three objects had the same contrast and were smaller than the eyes' interommatidial pixelation, their differences would be invisible, giving them equal salience, and *Drosophila* should fixate to them with equal probability. Whereas, our theory (**Fig. 5**) predicts that for a fly with hyperacute 3D-vision, the 3D-pin would appear different from the 2D-dots, with its saliency increasing fixations. In support of our theory, the results showed that *Drosophila* prefers to fixate hyperacute 3D-pins, irrespective of their positioning (**Fig. 6, C to E**). Equally, in separate experiments, the flies readily fixated on hyperacute 2D-dots ( $0.98^\circ$ ) hidden in a  $1.0^\circ$  hyperacute stripe-scene (**Fig. 6, F to J**), which by the old theory would be impossible (**Fig. 6G**). Moreover, the flies' hyperacute optomotor responses (fig. S61 to S63) followed the predictions of our theory (fig. S64 and S65).

In learning experiments (**Fig. 6K**), *Drosophila* saw both hyperacute 2D-objects (black bars, above, or dots, middle) and hyperacute 3D-objects (black pins inside bars or dots) and were taught by associative heat punishment (fig. S71) to avoid one or the other stimulus. Again, in support of our theory, the flies readily learned to avoid the punishment-associated stimulus, validating that they saw hyperacute 3D-objects different from their 2D-counterparts (of the same area/contrast). This learning was robust, as it matched the classic large-pattern T vs. L performance (39) (below). But importantly, it was abolished when either the left or the right eye was painted black (**Fig. 6L**, above and middle), indicating that hyperacute 3D-vision requires inputs from both eyes. In contrast, the large-pattern T- vs. L-learning still occurred with one eye only (below), consistent with the reported retinal-position-invariance in visual pattern recognition (39). Whereas, blind *hdc*<sup>JK910</sup> (**Fig. 6M**, above), *norpA*<sup>36</sup> (middle) and *norpA* (below) mutants, having no synaptic photoreceptor outputs but functioning auditory and olfactory senses, failed to learn the test stimuli, corroborating that wild-type *Drosophila* see the nearby world and learns its objects in hyperacute stereo.

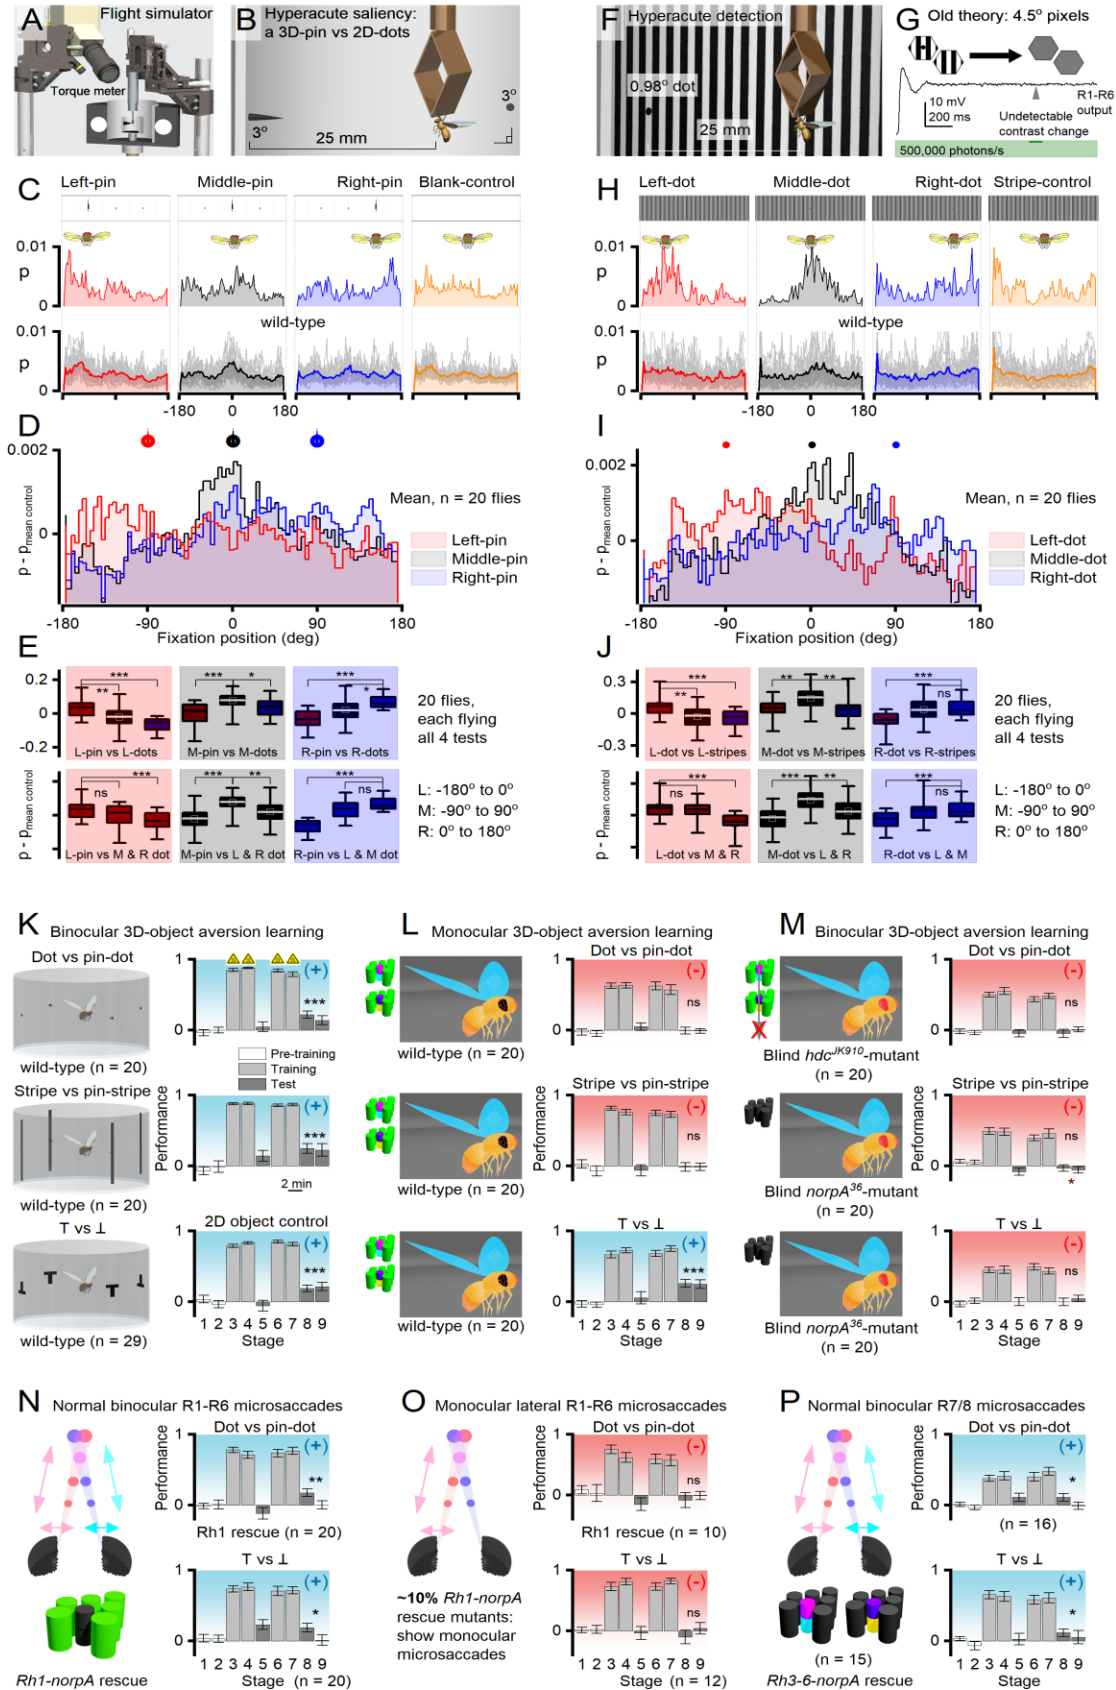

**Fig. 6. Hyperacute stereopsis requires two eyes with mirror-symmetric microsaccades.** (A and B) In a flight simulator, a torque-meter-tethered flying *Drosophila* controls how a white cup rotates around it, showing three black dots ( $3.9^\circ \text{ } \emptyset$ ),  $90^\circ$  apart, one with a black 4-mm-center-pin ( $1^\circ \text{ } \emptyset$ ). Axially 25 mm away, the 3D-pin at  $-90^\circ$  (left),  $0^\circ$  (middle), or  $90^\circ$  (right) dot is monocularly indistinguishable from the 2D-dots. (C) Yet, flies fixate more on the pins than on the competing dots, implying 3D-pin salience. A single fly's (above) and population (below) frontal fixation probability to the left, middle and right pin/dot-positions, and during a blank-control. (D) Fixation probabilities for the three pin-positions; blank-control subtracted to minimize experimental bias. (E) Positional salience (e.g. left-pin vs left-dots, above) and direct competition (e.g. left-pin vs middle- and right-dots, below) statistics/trends indicate that *Drosophila* see hyperacute 3D-pins amongst 2D-dots (super-resolution stereopsis). (F) Testing hyperacute 2D-object detection. (G) Old theory simulation: a fly with static 2D-vision and  $4.5^\circ$  ommatidial pixelation cannot detect a black  $0.98^\circ$  dot hidden amongst  $1.2^\circ$  stripes, as its optically-corrected contrast difference over a photoreceptor's RF ( $5.4^\circ$  half-width) is only  $\sim 1.6\%$  of that of the stripes alone, evoking response differences  $<$  voltage variation (noise) for such a contrast pulse (green, 100 ms). (H) Nevertheless, flies fixate on the hidden dot, irrespective of its position. A single fly's (above) and population (below) frontal fixation probability to the left, middle and right dot positions, and during a stripe-control. (I) Fixation probabilities for the three dot-positions; stripe-control subtracted to minimize bias. (J) Positional detection (e.g., left-dot vs. left-stripes, above) and salience (e.g., left-dot vs. middle- and right-stripes, below) statistics/trends indicate that *Drosophila* find hyperacute dots visually interesting. (K) *Drosophila* learns to avoid hyperacute 3D-pins or 2D-lines/dots (above and middle), associated with IR-heat punishment (training), equally well to the classic T vs. J conditioning (below). (L) One-eye-painted *Drosophila* fails to learn hyperacute 3D- and 2D-object avoidance (above and middle), demonstrating that super-resolution stereo vision requires two eyes. Yet monocular *Drosophila* shows normal T vs. J conditioning (below), indicating that one eye is enough to learn large 2D-patterns, consistent with retinal-position-invariant pattern recognition (39). (M) Blind *hdc*<sup>JK910</sup> (above) and *norpA*<sup>36</sup> (middle and below) mutants, with no synaptic photoreceptor outputs but normal auditory and olfactory senses, failed to learn the test stimuli, validating that the wild-type learning (K and L) was visual. (N) Rh1-rescue *norpA*<sup>36</sup> flies with functional R1-R6 photoreceptors and normal mirror-symmetric left and right eye microsaccades learned hyperacute 3D-stimuli (above) and large 2D-patterns (below), but less well than wild-type flies, indicating R7/R8 also contribute to stereopsis. (O)  $\sim 8\%$  of Rh1-rescue *norpA*<sup>36</sup> flies showed only left or right eye lateral microsaccade components, leading to asymmetric and asynchronous binocular sampling. These flies neither learned hyperacute 3D-stimuli (above) nor large 2D-patterns (below). Meaning, mirror-symmetric microsaccadic sampling is necessary for hyperacute stereopsis. (P) *norpA*<sup>P24</sup>-flies with rescued R7/R8-photoreceptors, showing normal microsaccades, learned to differentiate both coarse 2D- and hyperacute 3D-patterns. Thus, R7/R8s alone are sufficient for hyperacute stereopsis.

Finally, we tested whether learning hyperacute 3D-stimuli requires either R1-R6 or R7/R8 photoreceptors or both with intact microsaccadic sampling. Here, we exploited our serendipitous finding that rescuing R1-R6 or R7/R8 photoreceptors in blind *norpA*<sup>P24</sup>-mutants make their microsaccades' lateral component more fragile to mechanical stress or developmentally imperfect, with not every tethered fly showing them (fig S72). Therefore, after the learning experiments, we recorded each fly's light-induced deep pseudopupil movement (Fig. 3) and ERG, quantifying their

microsaccades and phototransduction function, respectively. We found that whilst most *norpA*<sup>P24</sup> Rh1-rescue flies (R1-R6s are sampling, R7/R8s not) showed normal binocular microsaccades (**Fig. 6N**), ~10% showed microsaccades only monocularly (Fig. 6O). Importantly, however, each fly eye (both left and right) showed a characteristic ERG, indicating that its phototransduction, and thus axial microsaccade movement from PIP<sub>2</sub> cleavage (3, 4) was unspoiled. The flies with normal lateral microsaccades (**Fig. 6N**) learned the difference between hyperacute pins and dots (above) and large T- vs. L-patterns (below), but less well than wild-type flies (**Fig. 6K**), establishing that R1-R6 input is sufficient for hyperacute stereo vision but that R7/R8s must also contribute. Conversely, the flies that showed monocular lateral microsaccades (**Fig. 6O**) neither learned hyperacute 3D objects (above) nor large 2D-patterns (below), indicating that misaligned binocular sampling corrupts 3D-perception and learning. Whereas R7/R8 rescued *norpA*<sup>P24</sup>- (**Fig. 6P**) and *ninaE*<sup>8</sup>-mutants confirmed that the inner photoreceptors also contribute to hyperacute stereopsis.

These findings concur with our simulation results, which predicted that asynchronous binocular sampling should break stereopsis (fig. S55). Collectively, these results demonstrate that binocular mirror-symmetric microsaccadic sampling is necessary for super-resolution stereo vision and that both R1-R6 and R7/R8 photoreceptor classes contribute to it.

## Discussion

We showed how the *Drosophila* compound eyes' binocular mirror-symmetric photoreceptor microsaccades (**Fig. 1 to 3**) generate phasic disparity signals in much finer resolution than its ommatidial pixelation (**Fig. 4 and 5**). The *Drosophila* brain could use these signals to triangulate object distance to a neural distance signal in time (**Fig. 5**), enabling stereopsis (**Fig. 6**). We also revealed how the microsaccades across the eyes track a flying fly's optic flow field to maximize information from the world in motion (**Fig. 3 and 4**). *Drosophila* visual behavior matched the modeling predictions (**Fig. 5 and 6**), demonstrating that the neural image generated by mirror-symmetric microsaccadic sampling must result in a higher quality perceptual representation of the stimulus as compared to the neural image generated by immobile photoreceptors (1, 2), or asymmetric or asynchronous binocular sampling (fig. S55). By integrating *in vivo* experimental assays from subcellular to whole animal 3D-perception with multiscale modeling from adaptive optics to depth computations, these results establish a new morphodynamic light information sampling and processing theory for compound eyes, to better understand insect vision and behaviors (4, 40). To further demonstrate its explanatory power, we also verified its predictions of *Drosophila* seeing nearby objects in higher resolution (fig. S64) and "optomotor behavior reversal" (41) not resulting from spatial aliasing (fig. S65).

It has been long thought that because the eye and head movements are dominated by axial rotation, they should provide little distance information as objects, near and far, would move across the retina with the same speed (42). In contrast, our study highlights how the visual systems can use microsaccades, and eye/head rotations, to both contrast-enhance (fig. S24; **Movie S7**) and extract depth information (**Movie S10**). Rapid mirror-symmetric inward-rotating photomechanical photoreceptor microsaccades in the left and right eyes cause phase-difference signals, which inform the *Drosophila* brain in time how far an object is from its eyes. But when the world is still, a fly can further contract its intraocular muscles (6), rotate or move its head from side-to-side, as insects with compound eyes commonly do during fixation, to generate both binocular and motion parallax (43) signals to resolve object depth.

With mirror-symmetric microsaccadic sampling, flies and possibly other insects with binocular compound eyes can have an intrinsic sense of size. For two objects with equal angular size and velocity as projected on the eyes, the closer one, and thus physically smaller (a mate), generates a brief and precise binocular disparity in time. While the other object, further away and thus bigger (a predator), generates longer-lasting but more blurred disparity.

This encoding strategy applies to machine vision. Super-resolution depth-information about a nearby object (moving or still) can be extracted in time, for example, by piezo-resonating synchronously and mirror-symmetrically two horizontally separated sampling matrixes (left and right) with overlapping views and then correlating their phasic differences for each corresponding pixel; equating to a two-matrix extension of the VODKA sensor principle (44)). In more sophisticated optic flow-optimized 3D systems, binocular photomechanical pixel-sensors could move along their specific concentric rotation axes as in the *Drosophila* eyes.

Lastly, we note that recent work has shown that human cones (45) and vertebrate rod-photoreceptors (46) contract photomechanically, comparable to *Drosophila* photoreceptor microsaccades (3, 4). It will be interesting to see whether these microsaccades increase visual acuity and participate in stereo vision and whether high-intensity X-rays also activate them (8-10).

**Acknowledgments:** We thank T. Salditt, B. Hartmann, and M. Sprung for help and support with DESY experiments; E. Chiappe, R. Strauss, B. Brembs, A. Zelhof, and E. Buchner for flies; E. Chiappe for help with 2-photon-imaging preparation optimization; M. Reiser for sharing unpublished *Drosophila* eye structural data; T. Salditt, G. de Polavieja, G. Belušič, A. Straw, L. Fenk, A. Nikolaev, and A. Lin for discussions. **Funding:** This work was supported by Jane and Aatos Erkkö Foundation Fellowships (M.J. and J.T.), The Leverhulme Trust (RPG-2012–567: M.J.), the BBSRC (BB/F012071/1, BB/D001900/1 and BB/H013849/1: M.J.), the EPSRC (EP/P006094/1: M.J.), the White Rose BBSRC DTP (BB/M011151/1: M.J. and B.S.), the Open Research Fund of the State Key Laboratory of Cognitive Neuroscience and Learning (M.J.), High-End Foreign Expert Grant by Chinese Government (GDT20151100004: M.J.), DESY-synchrotron (I-20190808 EC, I-20180674 EC and I-20170823: M.J. and R.M.) and ESRF-synchrotron (LS-2780: M.J. and R.M.) beam-time grants. **Author contributions:** Conceptualization (M.J., J.T., J.K., B.S., and K.R.H.), Data curation (J.K., B.S., K.R.H., J.T., J.M.M., and M.J.), Formal Analysis (J.K., B.S., K.R.H., J.T., J.M.M., and M.J.), Funding acquisition (M.Hu., R.M., and M.J.), Investigation (J.K., B.S., K.R.H., J.T., N.M., J.M.M., G.L., P.S., J.H., A.A., J.P.S., F.B., R.C.H., M.E., F.W., J.F., C.H.L., and M.J.), Methodology (J.K., B.S., K.R.H., J.T., J.M.M., H.H., M.Hu., R.M. and M.J.), Project administration (M.J.), Resources (M.H., R.M., and M.J.), Software (J.K., K.R.H., J.T., J.M.M., Z.S., M.Ha., H.H., and M.J.), Supervision (M.Hu., R.M., and M.J.), Validation (J.K., B.S., K.R.H., J.T., J.M.M., and M.J.), Visualization (J.K., B.S., K.R.H., J.T., J.M.M., and M.J.), Writing – main paper original draft (M.J.), Writing – Supplementary Materials original draft (M.J. and J.T.), Writing – review & editing (M.J., J.K., B.S., K.R.H., J.M.M. and J.T.); **Competing interests:** Authors declare no competing interests. **Data and materials availability:** All data is available in the main text or the supplementary materials.

## Materials and Methods

**Materials and Methods** are organized in seven **Sections (I-VII)** that explain the multiscale experimental and theoretical approaches to study how photoreceptor microsaccades sample hyperacute 3D visual information, broadly following their presentation order in the main paper.

- I. Measuring X-ray-induced global photoreceptor movements and ERG**, pp. 3-16
- II. *In vivo* high-speed optical imaging of photoreceptor microsaccades**, pp. 17-65
- III. *In vivo* 2-photon  $\text{Ca}^{2+}$  imaging L2-neuron responses to hyperacute stimuli**, pp. 66-78
- IV. Multiscale modeling the adaptive optics and photoreceptor signaling**, pp. 79-104
- V. Binocular connectivity**, pp. 104-109
- VI. Flight simulator experiments**, pp. 110-139
- VII. Fly genetics**, pp. 140-141

Because **Sections I-V** describe new experimental apparatuses and theoretical modeling never before used in this way to study insect vision, we provide further in-depth supportive evidence of their power and limits in acquiring *in vivo* experimental results and in dissecting and integrating this new knowledge.

## I. Measuring X-ray-induced global photoreceptor movements and ERG

### Overview

This section describes ESRF and DESY synchrotron experiments to measure the *Drosophila* eyes' global photomechanical photoreceptor movements (synchronous left and right eye microsaccades) to high-brilliance X-ray stimuli with simultaneous electrophysiological (electroretinogram, ERG) responses. It gives central background information and additional supporting evidence for the results presented in the main paper, including:

- X-rays activate phototransduction similar to visible light, causing photoreceptors to contract photomechanically while generating a normal electrical response.
- The left and right eye microsaccades are mirror-symmetric.
- Microsaccades are photomechanical – independent of intraocular muscle activity.

### I.1. *In vivo Drosophila* preparation

Under a stereomicroscope, 3-4 day old (12:12 light-dark cycle reared) *Drosophila* were gently attached inside a size-adjusted pipette tip by puffing air so that their head and upper thorax protruded from its small-end. Using a low melting point (60-64 °C) beeswax (**fig. S1A** and **B**), a fly was swiftly fixed to the tip end without touching its eyes and leaving the abdomen intact for respiration. Its head was waxed to the thorax, and the proboscis was stretched and waxed to the pipette wall to minimize muscle-induced head and vergence eye movements. We took special care for not accidentally denting the eyes during the preparation making, as this can damage the photoreceptor microsaccades' sideways component (see **Section II.4.**, below). In some preparations, such as the one shown in **fig. S1B**, we also fixed the antennae with a beeswax blob to minimize muscle activity.

The pipette tip's large-end was super-glued on a standard preparation holder metal pin (**fig. S1A**, inset), which was then used to transport and connect the fly – in a desired orientation and position - to the X-ray beamline's tomographic rotation-stage for either one or two eye imaging (**fig. S1C** and **D**). Once the fly was aligned correctly for the X-ray imaging/stimulation experiments with the selected magnification, we took a photograph of its eyes for the records.

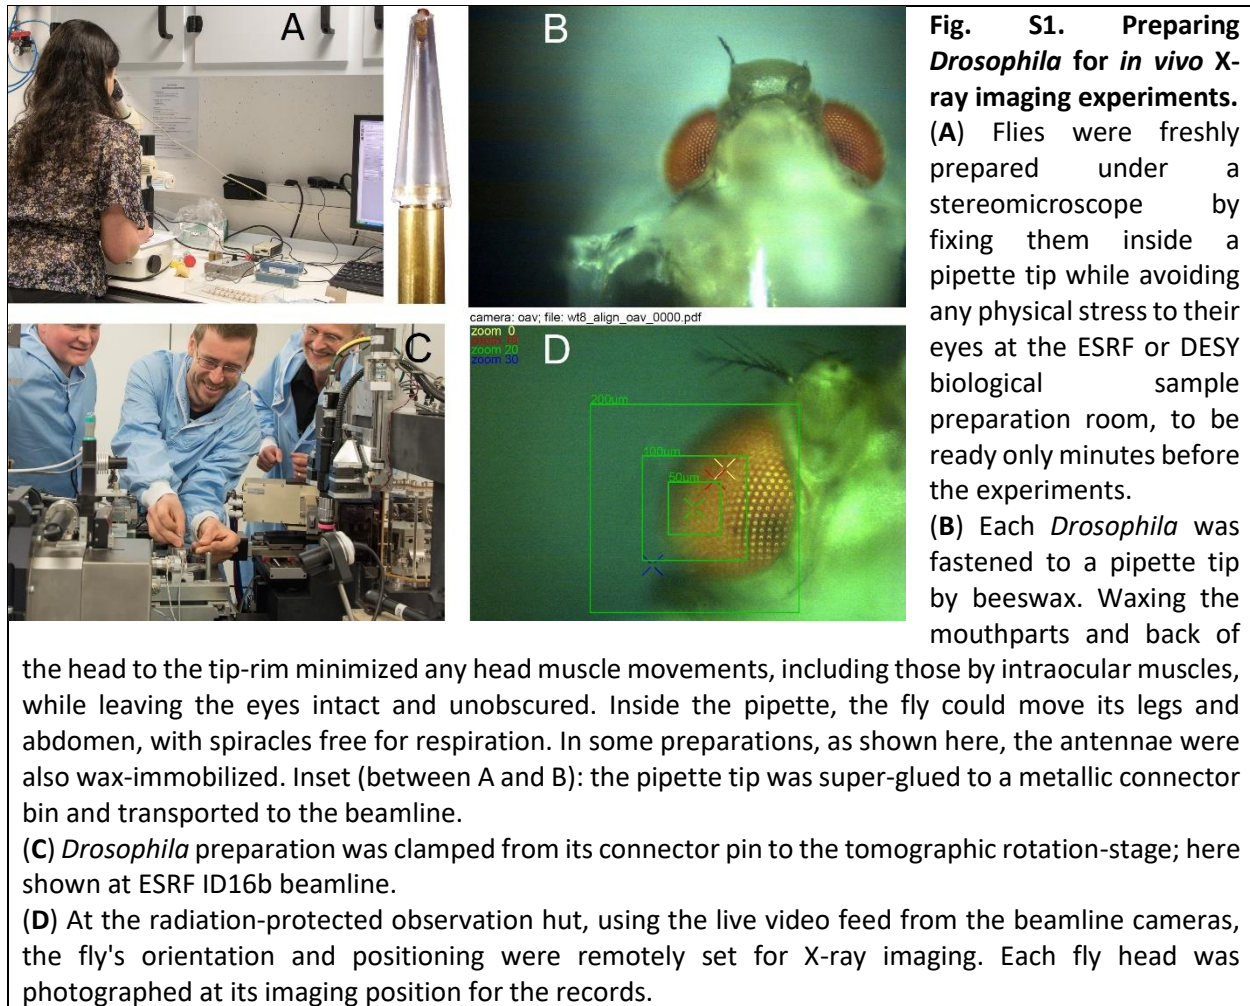

## I.2. *In vivo* X-ray imaging

In the initial ESRF beamline experiments (**fig. S2A**), we generated x-ray pulses of pre-set intensities and durations (typically 100-300 ms) to record photomechanical photoreceptor microsaccades (100 frames/s) to a 10 ms bright white LED flash, as synchronized by TTL-pulses. The high-intensity LED was positioned ~5 cm above the fly head to generate locally - in the upper-section of the eye - photomechanical photoreceptor contractions, in which speed, size, and direction would be then revealed by high-resolution (200 nm pixel) X-ray-imaging. However, surprisingly, we found X-rays themselves made all the photoreceptors in the two eyes rapidly contract mirror-symmetrically in synchrony (**fig. S2B**) and that the size and speed of these contractions directly depended upon the X-ray intensity. Meaning, the white LED flash was not needed to activate photoreceptor contractions, as X-ray seemed to activate them directly. Moreover, during X-ray imaging, the beamline lights were either on or off, but this had little or no effect on the photoreceptor contraction amplitudes. This observation is consistent with the findings that photomechanical photoreceptor microsaccades occur equally well in the dark- and light-adapted eyes (4) (see **Section II.6.**, below).



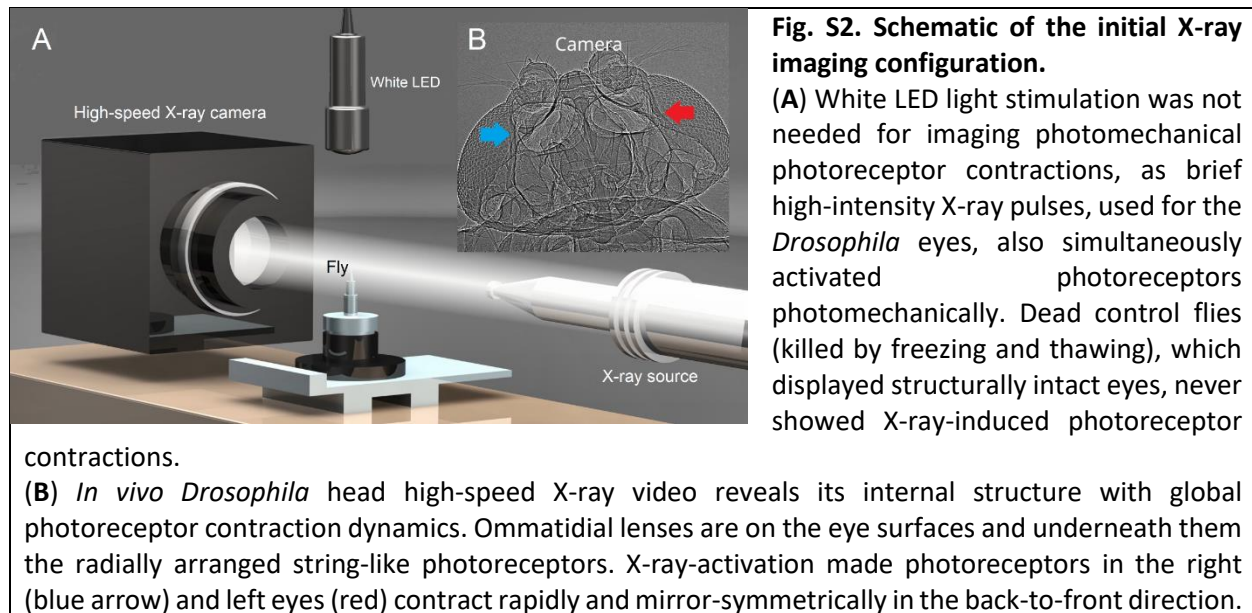

During a typical test protocol that consisted of six 300-ms-long intensifying X-ray pulses, the flies remained alive as we often saw spontaneous antennae movements, which made us fix the antennae with beeswax in some later preparations (**fig. S1B**). After the experiments, we checked that the flies were still alive by observing their leg movements inside the pipette tip. Sometimes, we even let a fly out of the pipette tip to see it walk. Because the X-ray-induced photoreceptor contractions (i) could be reliably repeated without extensive changes in their dynamics (**fig. S3**), (ii) these dynamics (their speed and size) were intensity-dependent, and (iii) that these dynamics matched those of the visible-light-induced photoreceptor microsaccades (4) (see **Section II.**, below), it seemed plausible that X-rays were directly activating phototransduction. Moreover, if the photoreceptor microsaccades were a part of intraocular-muscle-induced retinal movements - driven by clock-spikes (47), fast gaze-stabilization reflexes, or visuomotor feedbacks (6) -, we would not expect them to show adaptive intensity-dependent dynamics but instead be of similar size and speed at all tested X-ray-intensities. Such dynamics we never saw.

Detailed top speed and total displacement depth profiles by cross-correlation analysis show that photoreceptors' proximal ends near the basement membrane moved more vigorously than their distal ends during the X-ray pulses, while the lenses remained still (**fig. S3E**). However, the cells deeper in the brain likely move more than indicated here since (i) the brain neuron processes appear utterly transparent in the X-ray images possibly due to their size, organization, and X-ray optical properties, and (ii) contracting receptors could be seen pulling the whole basement membrane while contracting.

We also calculated similar speed and displacement profiles along the top-bottom axis, showing that the receptors near the eye's medial edges moved the most (**fig.S3F**). Since the medial receptors have binocular overlap (see **Section II.1.ii.**, below) and participate in the proposed dynamic stereo vision (see **Section IV.10.**, below), it seems reasonable to assume that this is a specialization to perceive depth better by shifting the receptive fields fast over a relatively larger area compared to the more lateral-inferior receptors. Interestingly, however, whereas the top-bottom displacement profile shows a somewhat monotonically decreasing trend, the speed profile has a visually distinct

bump between 20° and 60° rotations from the top. This bump is possibly a specialization to the optic flow that a fly experiences during its forward locomotion; During forward locomotion, visual objects appear to move in general fastest when located perpendicularly to the locomoted direction.

In **fig. S3**, we deliberately show one of the most successful flies of the granted beamtimes. The slight variations (**i**) in the rotation of the fly with respect to the X-ray beam and (**ii**) the head's tilt caused the photoreceptor contractions to occur more out-of-plane in some specimen than in other, almost as if twisting. Moreover, the increasing angle between the camera-image and the microsaccade planes sinusoidally decreased the observed motion.

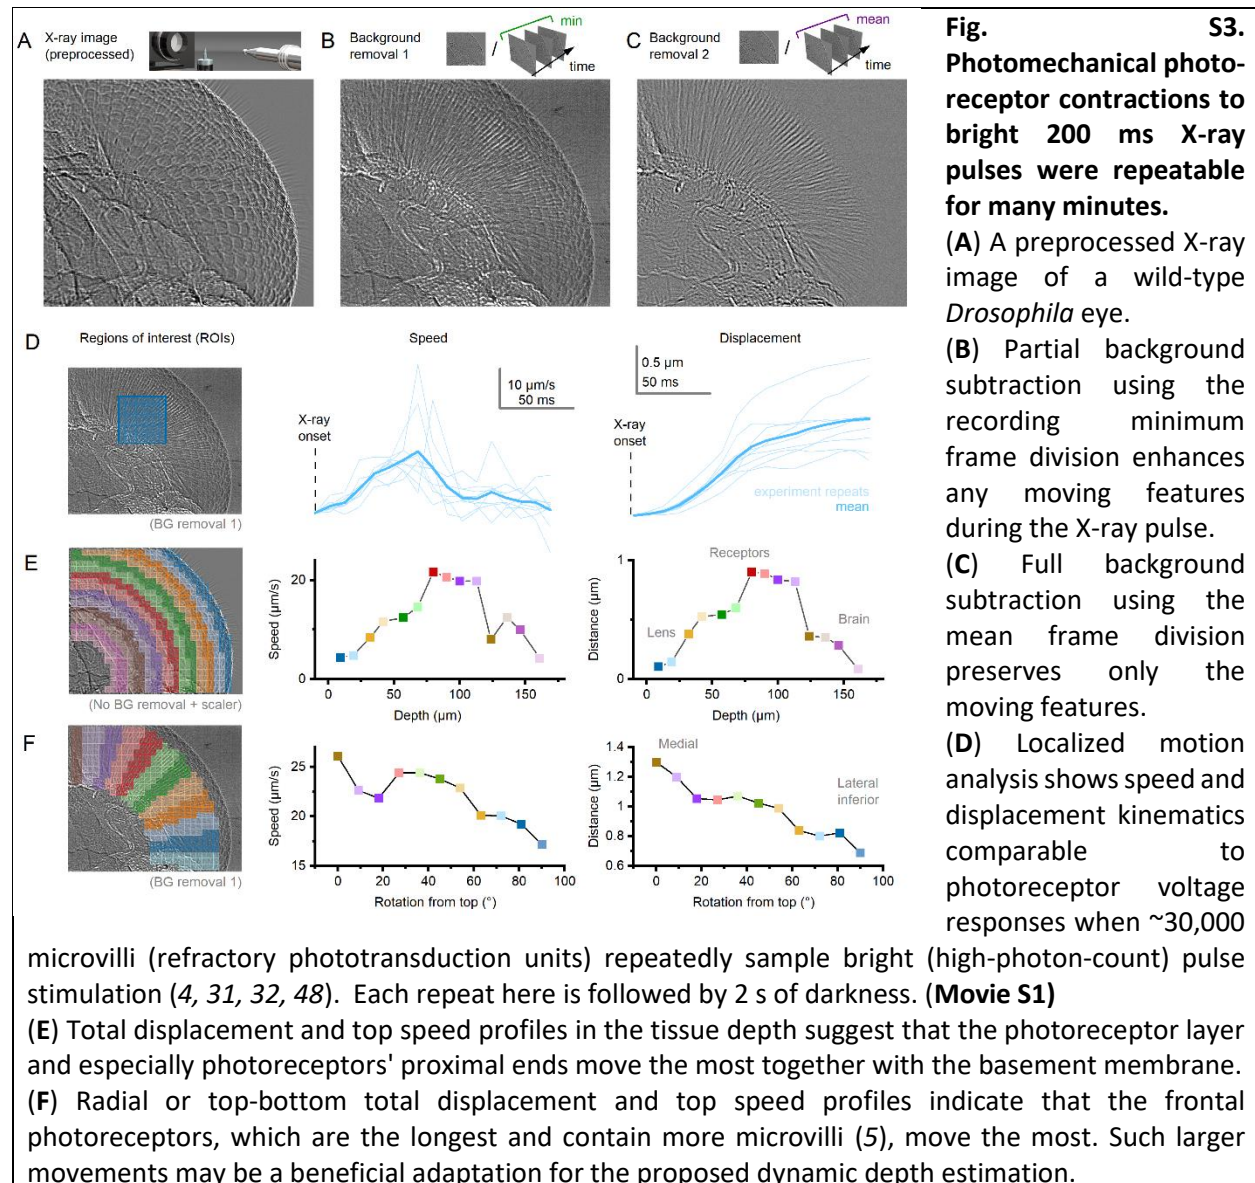

To further test that the photoreceptor movements during X-ray imaging were not caused by heat-induced tissue shrinkage or expansion, we freshly killed some flies by placing them in a freezer for >30 min and repeated the recordings. None of the freshly killed flies showed photoreceptor

contractions, or any other intra-cutaneous movements, although these were seen when the flies were alive, suggesting that direct X-ray phototransduction activation caused the photoreceptor contractions.

### I.3. ERG-recording at X-ray beamlines

To test whether (i) X-rays activate photoreceptors and (ii) photoreceptors contract photomechanically, we combined *in vivo* X-ray source imaging with electrophysiology in wild-type flies and blind mutants. The fly-eye photoreceptors' global electrical responses to high-brilliance X-ray pulses were recorded using the conventional electroretinogram (ERG) method with extracellular microelectrodes (12, 13, 47) (**fig. S4**).

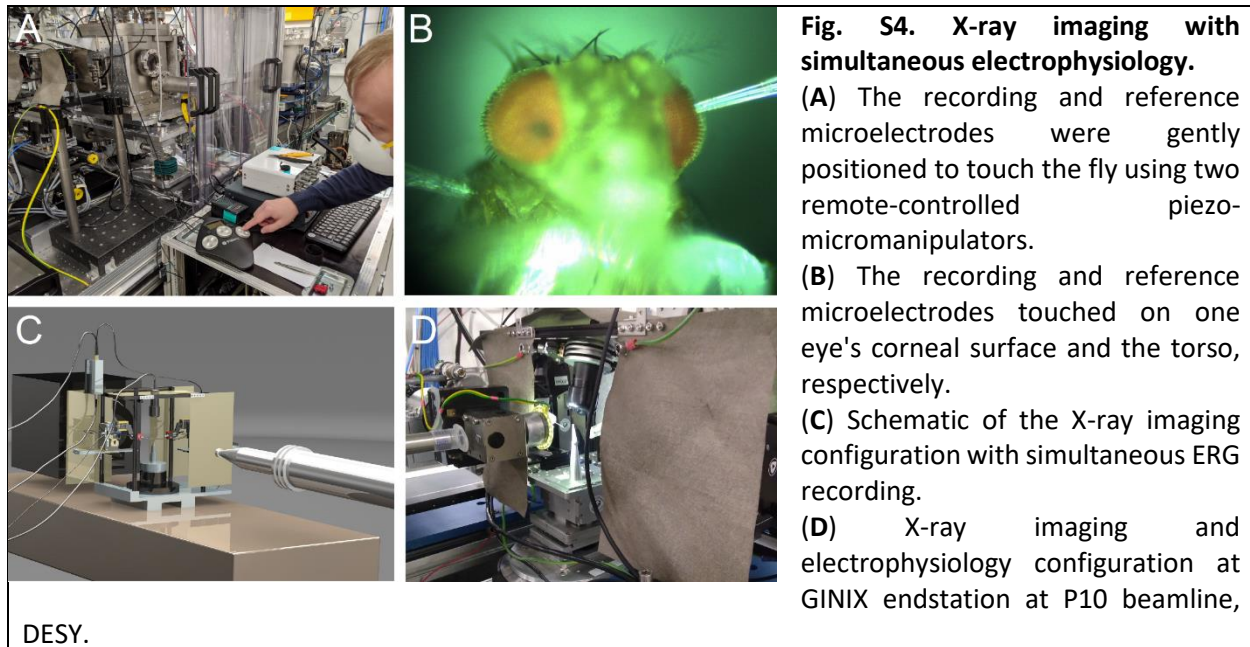

A fly was affixed by beeswax to a size-adjusted pipette tip to ensure its head remained stationary (see **Section.I.1.**, above). The pipette was super-glued on a standard preparation holder pin, used to transport and connect the fly – in a desired orientation and position – to the X-ray tomographic rotation stage. Blunt (low-resistance) filamented borosilicate glass capillary microelectrodes (0.7 mm inner and 1.0 mm outer diameters) filled with fly Ringer (containing in mM: 120 NaCl, 5 KCl, 10 TES, 1.5 CaCl<sub>2</sub>, 4 MgCl<sub>2</sub>, and 30 sucrose) were attached to electrode holders (containing a chloridized silver wire) and connected to a microelectrode amplifier (EXT-02 B; npi Electronic, Germany) (**fig. S4A**). We carefully positioned the electrodes with two remote-controlled piezo-micromanipulators (uMp, Sensapex, Finland) while getting continuous visual feedback from the live-video-stream and electrophysiological laptop-computer display (Biosyst-software (4, 49)). The recording-electrode was placed to touch one eye's corneal surface, and the reference-electrode the fly's torso (**fig. S4B**). The electrode positioning was further helped by the microelectrode amplifier's simultaneous auditory feedback, in which pitch-change signaled the closing of the circuit when both the electrodes touched the fly.

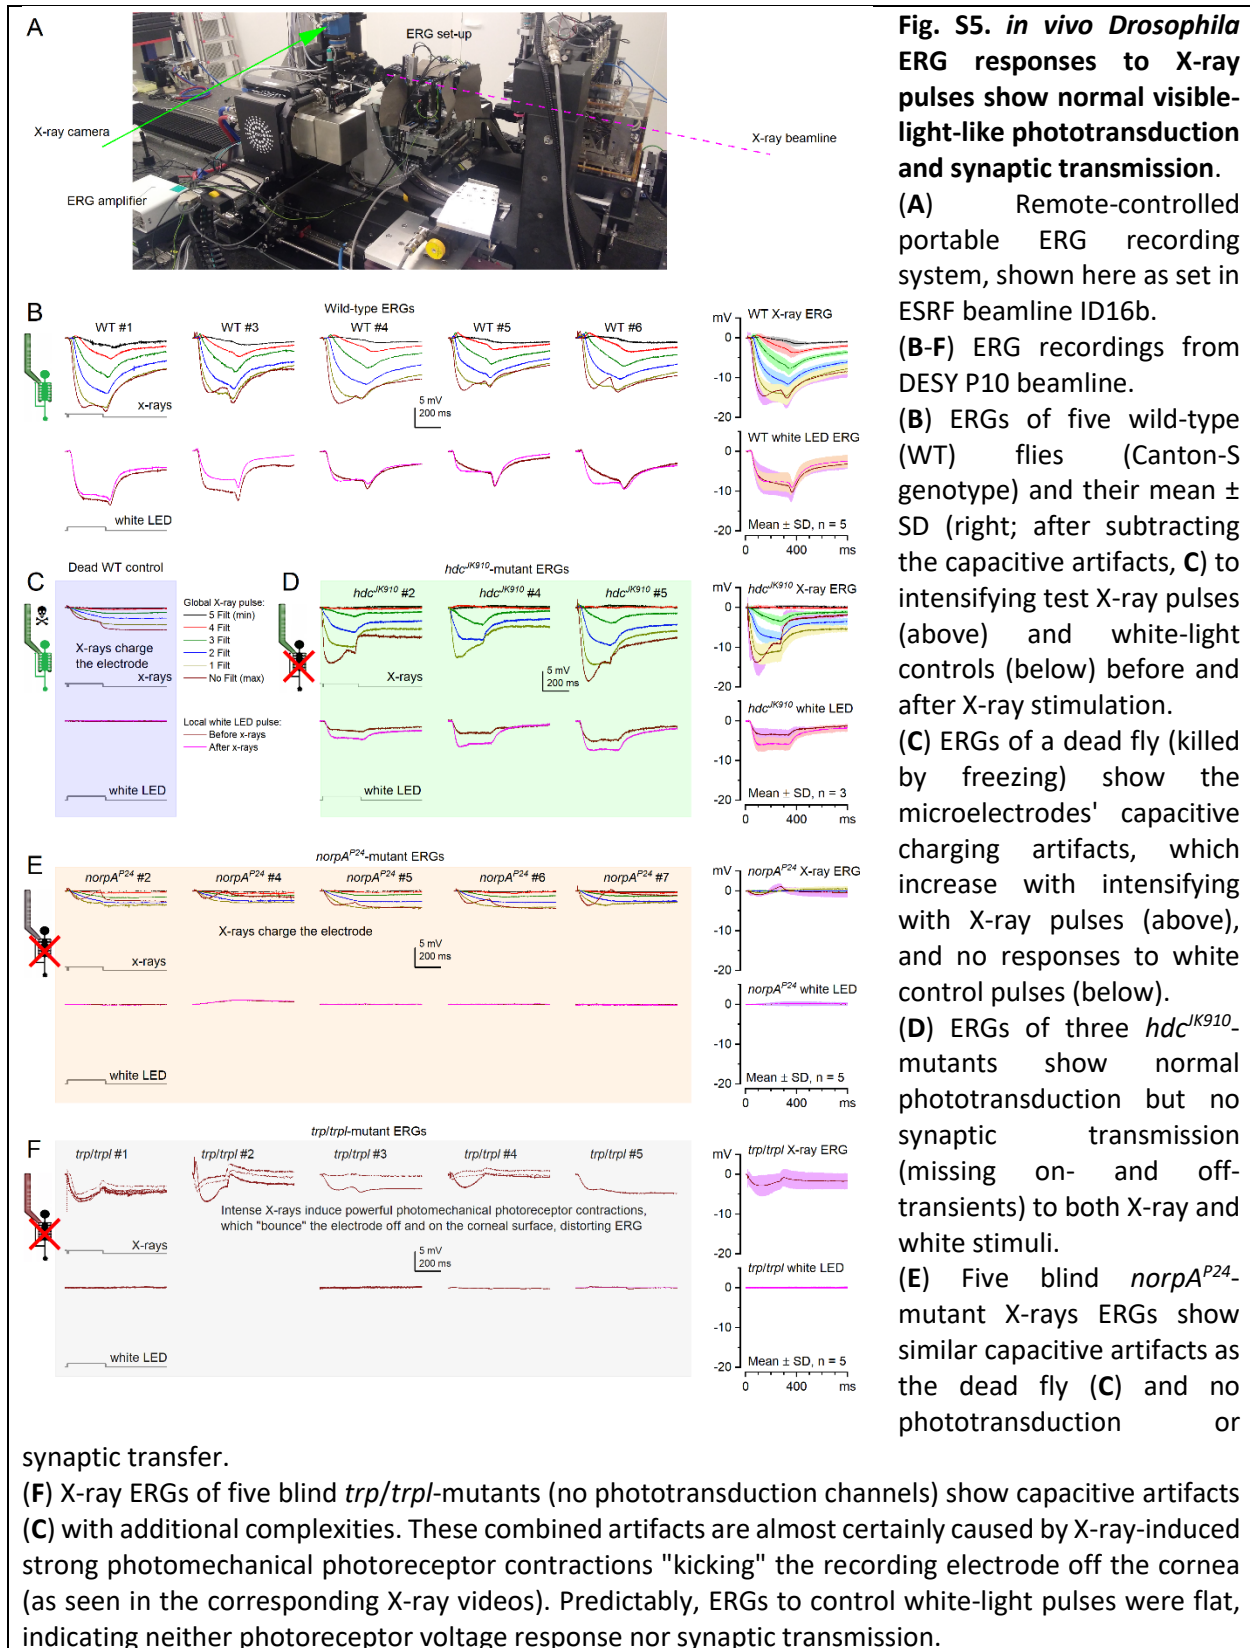

To minimize electrical noise during the experiments, we electrically grounded the recording system. The two micromanipulators were fastened to a bespoke rectangular cuboid metal frame (**fig. S4C and D**), in which metal-mesh curtains could be closed so that the fly was shielded inside a Faraday cage while leaving a narrow slit between its front and back curtains for the X-ray beam (**fig. S5A**). By connecting this Faraday cage and the micromanipulators to the microelectrode amplifier's central ground, we obtained low-noise ERG recording conditions with very little or no 50 Hz mains hum.

As the initial control stimulus, and to test that each fly was healthy, we recorded its dark-adapted eyes' global voltage response (ERG) to a 200 ms white-light flash (**fig. S5B**). This stimulus was delivered from a white-LED, positioned ~2 cm above the fly head, with the beamline lights off. About 30 s later, we recorded the same fly's ERG (low-pass filtered at 500 Hz and sampled at 1 kHz) and photomechanical responses (100 frames/s) to x-ray pulses, in which intensities and durations (100-300 ms) were set by remotely operating the beamline's neutral-density filters and high-speed shutter. To record the eyes' photoreceptor movement video and ERG responses simultaneously, we used TTL-pulses to synchronize the shutter, the high-speed X-ray-imaging camera, and the microelectrode recording system.

The highest intensity X-ray pulses could partly taint the recorded ERG signal by capacitively charging the ringer-filled borosilicate microelectrodes. These electrode artifacts were most apparent in the ERGs of the dead flies (freshly-killed by freezing), which otherwise generated no electrical response (**fig. S5C**), and their waveforms were microelectrode-dependent, varying slightly between the preparations and the exact electrode positioning in the beamline. For example, the charging artifact was reduced if only one electrode were within the X-ray beam instead of both. We utilized this observation by keeping the reference electrode outside the X-ray view, where it touched the torso (**fig. S4B**) rather than the fly head, which would have been the conventional configuration. With this new arrangement, we could subtract the average dead-fly ERG from the ERGs of the living flies (**fig. S5B to F**). However, this procedure was not perfect as it left a small erroneous capacitive artifact that varied from fly to fly (**fig. S5B to F**, right subfigures). But since the tested phototransduction phenotype ERGs were unambiguous to both white-light and X-rays, showing their predicted waveforms, these minor artifacts made no real difference in the analyses.

The wild-type ERGs to X-ray pulses showed the intensity-dependent hyperpolarizing photoreceptor response component and the light On- and Off-transients (12, 29) caused by histaminergic synaptic transmission (13, 50, 51) (**fig. S5B**). These ERG transient were missing from all the tested blind mutant fly recordings (**fig. S5D to F**). In further tests, by using longer (900-1,000 ms) X-ray pulses to evoke larger responses, the synaptic transient became more prominent (**fig. S6**), consistent with the reported intracellular recordings (28, 29, 52). These dynamics were robust and repeatable, seen in every successfully-prepared living sighted *Drosophila* (n = 5), verifying that X-ray-induced phototransduction response and its synaptic transmission to the visual interneurons (Large Monopolar cells, LMCs (13, 50, 51)) happened normally in wild-type flies.

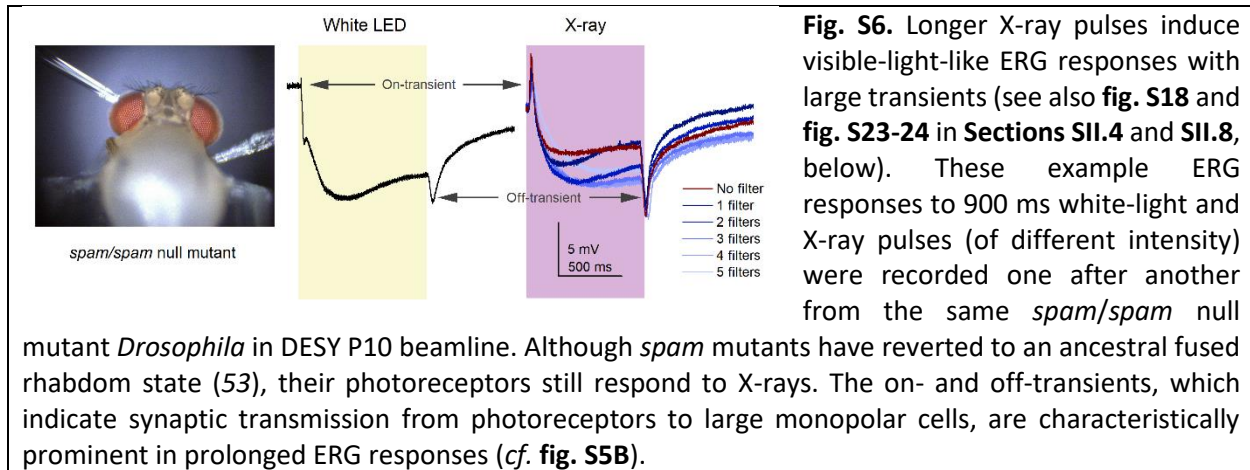

#### I.4. X-ray-imaging methods (general)

The X-ray imaging experiments were performed at two large-scale facilities: ESRF (beamline ID16b) and DESY (beamline P10). Both instruments are based on the same concept of focusing the X-ray beam to create a fine focal spot of below 100 nm using two mirrors in the so-called Kirkpatrick-Baez arrangement (one focusing vertically the other horizontally) (**fig. S7**). By placing the sample at a small distance downstream of the focal spot and the detector further downstream, geometrical magnification is achieved. The effective resolution of the acquired radiographic projections is further limited only by the dimensions of the focal spot. In this experiment, we did not strive for the best spatial resolution. Rather, we optimized the setup to enable *in vivo* imaging by balancing the X-ray dose, exposure time, image contrast, and resolution. The optimization process is complex as the deposited X-ray dose scales with the 4<sup>th</sup> power of the spatial resolution; furthermore, the temporal resolution is equally important to avoid blurring caused by the photoreceptor contraction.

Both instruments work with near monochromatic X-rays (on ID16B,  $\Delta E/E$  was  $\sim 1\%$ ). At ID16b at ESRF, we selected 17.5 keV photons corresponding to 0.07 nm wavelength; at P10 in DESY, the energy was set to 10.0 or 13.8 keV, corresponding to 0.12 or 0.089 nm. The approximated maximal used photon flux at these instruments were  $3 \times 10^5$  photons/s/ $\mu\text{m}^2$  and  $6 \times 10^6$  photons/s/ $\mu\text{m}^2$ , respectively. The estimated skin dose on the insect eye is 100 Gy per projection for the ID16b experiment. The detector's image formation is governed by near-field diffraction of the partially coherent wavefront as transmitted by the sample. This is due to the partially coherent nature of the X-ray beam in both setups. The effective pixel size was set to 70 nm at ID16b and 167 nm at P10 with exposure times down to 10 ms controlled by a fast shutter upstream the sample (ESRF) or the camera frame rate (DESY). In the current study, we performed 2D radiography, for which the sample rotation allowed us to select the best viewing angles.

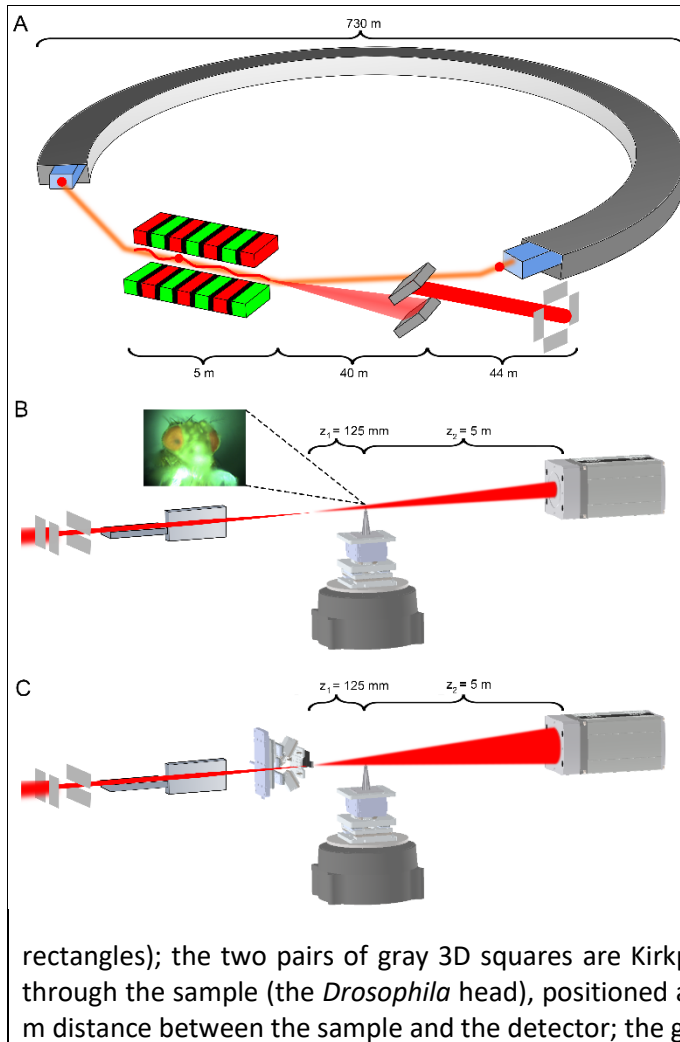

**Fig. S7. High-brilliance X-ray imaging of *Drosophila* photoreceptor microsaccades using synchrotron radiation setup at the GINIX instrument (P10/PETRA III, DESY)**

(A) Schematic of the synchrotron source and beamline. 2.3 km long DESY storage ring. An electron beam (red dot) travels into a 5-m-long undulator (red/green; the beam path is shown in orange and oscillation within the undulator in red). From the undulator, the synchrotron radiation coil (red cone) is directed 40 m to the double-crystal monochromator Si(111) (two gray squares). The monochromator exports 13.8 keV monochromatized X-ray beam (red) 50 m to the vertical and horizontal slit system of GINIX (four gray rectangles).

(B) KB-beam configuration. X-ray beam (red) from the GINIX slit system (four gray rectangles) travels through the head of *in vivo Drosophila*, positioned at motorized sample stage (dark gray), 5 m to the X-ray camera (gray square at the end).

(C) KB-beam configuration with additional waveguide (WG) filter. X-ray beam (red) from the GINIX slit system (four gray

rectangles); the two pairs of gray 3D squares are Kirkpatrick–Baez mirrors, focusing the X-ray beam through the sample (the *Drosophila* head), positioned at the motorized stage (dark gray). There is a 5 m distance between the sample and the detector; the gray square at the end is the X-ray camera.

**The different X-ray imaging configurations used at GINIX endstation, P10, DESY. fig. S7** shows a schematic of the different synchrotron beam configurations at beamline P10 of PETRA III (DESY, Hamburg), powered by a low-emittance  $E = 6 \text{ GeV}$ ,  $\sim 730$  diameter storage ring (**fig. S7A**). The source of the P10 beamline is a 5 m U29 undulator, operated in the third harmonic. The X-ray beam was monochromatized by a double-crystal Si(111) monochromator, installed at  $\sim 40$  m behind the source, to a photon energy of 10 keV. The entrance slits in the second experimental hutch (eh2), where the "GINIX" endstation (54, 55) is installed, received the beam at about 44 m behind the monochromator. For the *Drosophila* experiments, we used two different beam setups and imaging configurations at the GINIX station:

- (1) In the KB-configuration, a pair of Kirkpatrick–Baez (KB) mirrors focused the X-ray beam to a size of  $300 \text{ nm} \times 300 \text{ nm}$  (**fig. S7B**). With the respective focal distances of 300 mm and 200 mm, for the sequentially arranged vertically and the horizontally focusing mirrors, the setup achieved about 125 mm a working distance (in the air); once the beam leaves the diamond window of the evacuated KB mirror tank. Holographic projection images were recorded by an sCMOS sensor with a pixel size of  $6.5 \mu\text{m}$ , coupled with a 1.1 fiber-optic to a  $15 \mu\text{m}$  Gadox scintillator. To achieve sufficient geometric magnification  $M$ , the detector was placed 5 m behind the KB focus. For the chosen  $M = (z_1 + z_2)/z_1$ , an effective

pixel size of 170 nm and an illuminated field of view in the object plane of 275  $\mu\text{m}$  x 165  $\mu\text{m}$  were reached.

- (2) In the waveguide-configuration, a 1D X-ray waveguide (formed by a thin film Mo/C[35nm]/Mo sandwich structure was (56), was placed into the X-ray focus of the KB-mirrors (**fig. S7C**). This configuration yielded a smoother, Gaussian-shaped illumination, increased coherence, and a higher numerical aperture. The illuminated field of view in the object plane was 435  $\mu\text{m}$  x 165  $\mu\text{m}$ .

For both the configurations, the sample was mounted on the same fully-motorized stage, with an additional dedicated optical table at the side for the microelectrode manipulator (**fig. S4**). The sample could be inspected by a motorized on-axis video camera during the experiment.

### **I.5. Analyzing X-ray-induced global photoreceptor microsaccades**

**Preprocessing.** The raw X-ray images were preprocessed using a custom computer script (57); first, to crop out any unused camera sensor area and only include those images in which the X-ray beam shutter was fully open. Next, a flat-field correction was performed by dividing each image by the corresponding mean flat image, based on the animal and the used X-ray attenuator setting. This pixel-wise division of the sample image by the non-sample image (the flat image) removed most of the non-sample features, caused, for example, by dust on the x-ray optics (vacuum windows) or imperfections of the KB surfaces, from the final images (**fig. S8**). Each mean flat image was averaged from 20 to 200 frames. This procedure helped to estimate the non-sample features more precisely in the presence of photon shot noise and small image fluctuations. To further reduce the noise and fluctuations, especially in higher attenuator settings, we ran all flat-field corrected images through a Gaussian filter using spatial and temporal kernels of 7 and 3 pixels, respectively.

In the X-ray images, global photoreceptor activation appeared as a faint twist of rhabdomeres against a stationary background. To improve detection of moving features, we added a further preprocessing step of band-pass filtering, in which the normalized spatial wavelengths outside the range from 0.03 to 0.1 range were set to zero in the Fourier space. This experimental preprocessing method resulted in a seemingly random mesh of strong-featured edges (**fig. S8B**), in which motion visually corresponded to the unfiltered X-ray images. The band-pass range was selected to best contain the rhabdomeric motion component, while lower spatial wavelengths (higher frequencies) presumably contained more noise and higher wavelengths (lower frequencies) of more extensive stationary features such as facet lenses. Overall, this frequency filtering seemed to provide a better target for the cross-correlation-based motion analysis. However, it came with the expense of slightly reduced spatial specificity and the need for an additional scaling factor due to the stationary edges parallel to the motion.

In **fig. S3E** and **F**, we used the background subtraction method by dividing each frame (i) by the minimum-value frame over the X-ray recording or (ii) by the mean-value frame to enhance any moving features while fainting or completely removing the stationary. We found out that the minimum frame subtraction leads to better motion analysis results, although the images are noisier than the mean frame subtraction. Understandably, the background subtraction methods are not reliable when analyzing the motion of stationary features, which is why in **fig. S3E**, we did not use them. Instead, we scaled the speed and displacement values to match their maximums with the maximums given by the minimum-frame background subtraction.



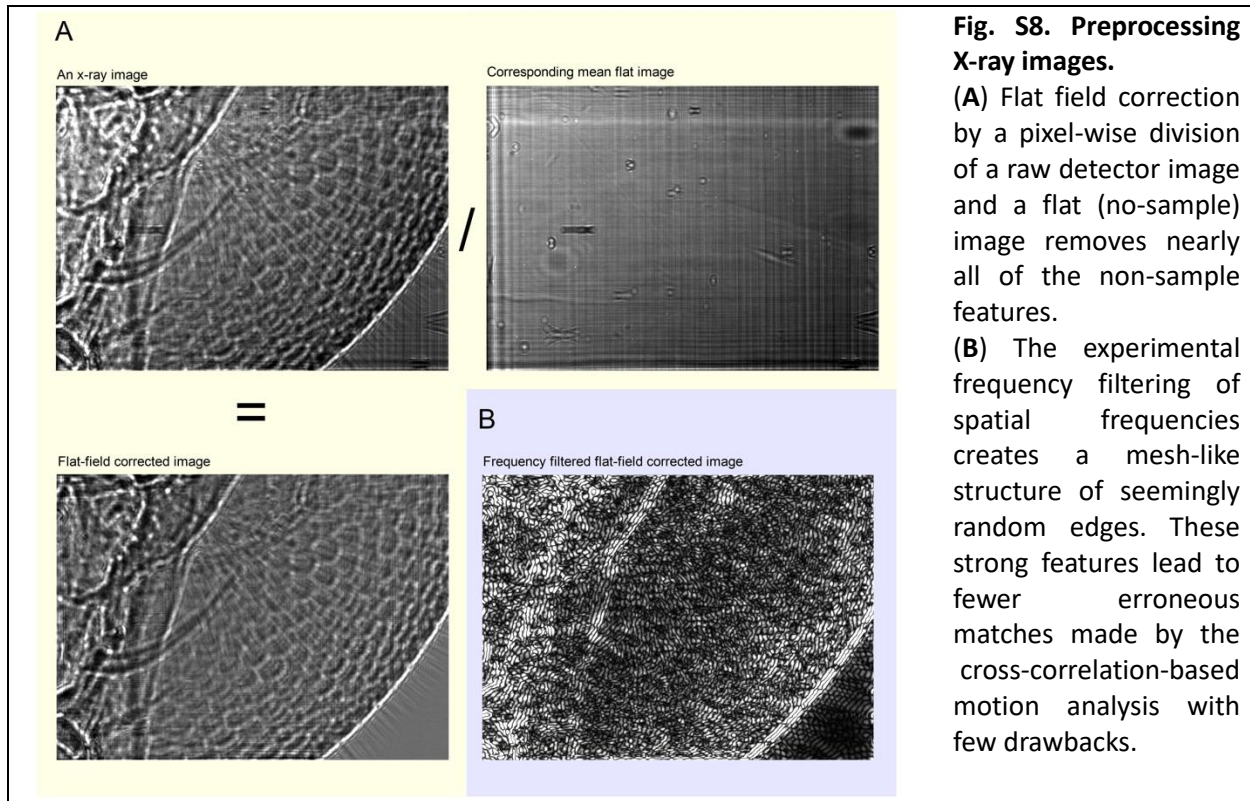

**Fig. S8. Preprocessing X-ray images.**

(A) Flat field correction by a pixel-wise division of a raw detector image and a flat (no-sample) image removes nearly all of the non-sample features.

(B) The experimental frequency filtering of spatial frequencies creates a mesh-like structure of seemingly random edges. These strong features lead to fewer erroneous matches made by the cross-correlation-based motion analysis with few drawbacks.

*Motion analysis by cross-correlation.* To quantify the rhabdomeric motion from the preprocessed time-series of X-ray images, we created a custom Python script to perform template matching using the open-source computer vision library OpenCV. This script later refined and packaged under the name *Movemeter* calls the `cv2.matchTemplate` function to perform the following normalized cross-correlation between source and template images (**fig. S9**)

$$R(x, y) = \frac{\sum_{x', y'} (T'(x', y') I'(x+x', y+y'))}{\sum_{x', y'} T'(x', y')^2 \sum_{x', y'} I'(x+x', y+y')^2} \quad (1)$$

$$T'(x', y') = T(x', y') - \frac{1}{w*h} * \sum_{x'', y''} T(x'', y'') \quad (2)$$

$$I'(x+x', y+y') = I(x+x', y+y') - \frac{1}{(w*h)} * \sum_{x'', y''} I(x+x'', y+y'') \quad (3)$$

Here,  $R$  is the 2-dimensional cross-correlation image while  $R(x,y)$  is the value of a pixel at some  $x, y$  coordinates,  $x', x''$  and  $y', y''$  are summation indices limited by the cross-correlation window width  $w$  and height  $h$  within the ranges  $[0, 1, 2, \dots, w-1]$  and  $[0, 1, 2, \dots, h-1]$ ,  $I$  is the source image, and  $T$  is the template image. We used a frame  $k$  as the source image and the subsequent frame  $k+1$  cropped by the cross-correlation window as the template image.  $k$  denotes the image frame index from 0 to  $N-1$ , while  $N$  is the count of frames acquired during an X-ray flash. In the cross-correlation image  $R$ , pixel values measure the similarity between the source and template images at each  $x, y$  location. Therefore, by taking the  $x, y$  location of  $R$ 's maximum value for each frame pair by *argmax* operation and calculating the cumulative sum, one can quantify the inter-frame displacement within a window in pixels. We restricted the inter-frame displacement to 10 pixels in

maximum to reduce erroneous matches where a sudden hundred or more pixel displacement could happen between two subsequent frames.

The cross-correlation window size was set to 32 x 32 pixels, and a rectangular region of interest (ROI) was filled with windows every 32 pixels in x and y. The ROIs were placed on image areas where rhabdomeric motion was visually apparent while simultaneously avoiding non-rhabdomeric movement sources from antennae or tracheal tubes. In the absence of rhabdomeric motion, as it was for some blind mutants, we used ROIs similar to the wild-type flies.

The displacement values we report are mean results from all windows and characterize the mean motion within the ROI. The values were calculated as the directionless mean square root displacements using the x and y motion components as

$$D = \sqrt{X^2 + Y^2} \quad (4)$$

where  $D$ ,  $X$ , and  $Y$  are displacement value arrays of length  $N-1$ , and  $N$  is the count of frames acquired during an x-ray flash. These values were transformed from the pixel units into micrometers using the pixel size unique for each detector and configuration. Where the frequency filtering preprocessing step was used, we scaled up all values by a factor of 4 to have perfect correspondence to the total displacement estimates made manually with a ruler in Fiji (ImageJ 1.53c). The need for this additional scaling was likely because the frequency filter preprocessing step also produced stationary edges parallel to the rhabdomeric motion, leading to underestimation of the rhabdomeric motion when calculating the mean displacement over many windows within an ROI.

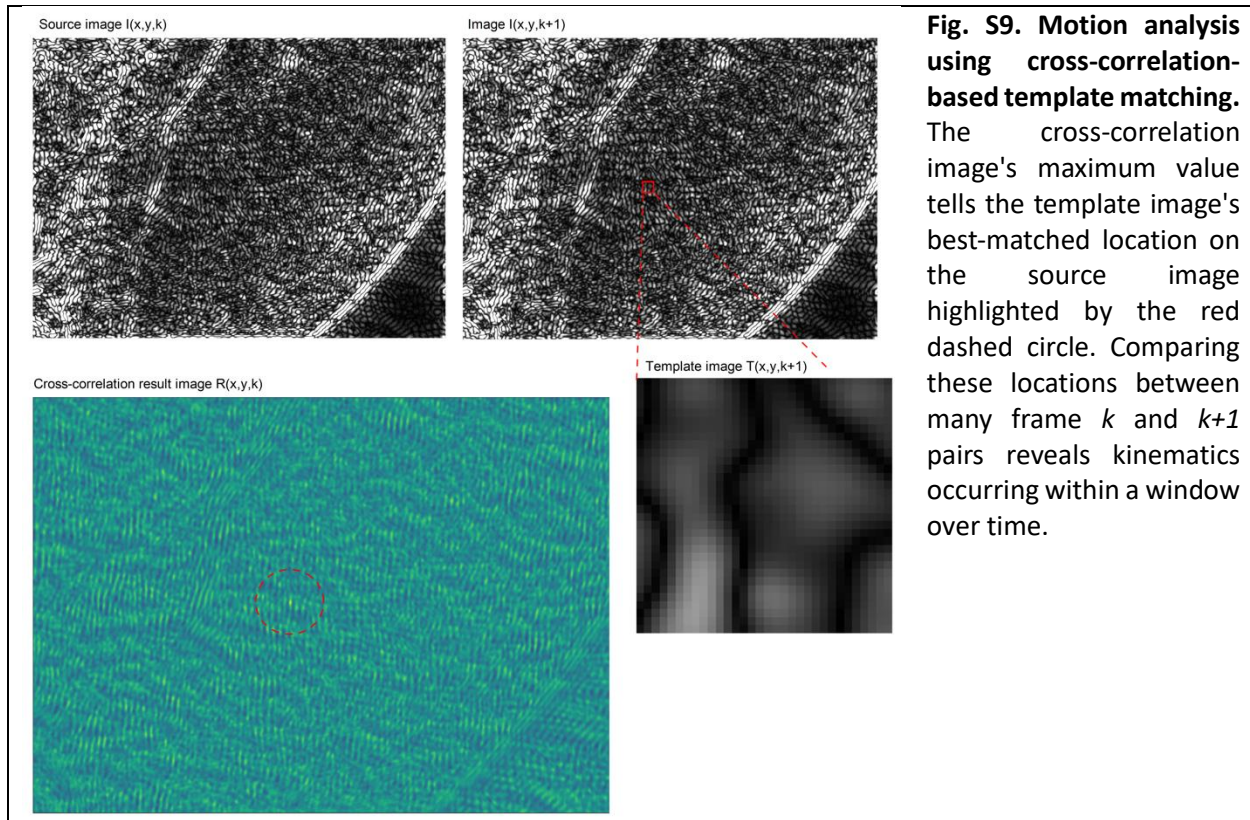

**Heat-map analysis.** To calculate the rhabdomere motion heat-maps during an X-ray flash, we used our MATLAB-based implementation that was also used for some of the rhabdomere displacement graphs. It uses the *imregtform* function from MATLAB's Image Processing Toolbox to estimate geometric transformation that aligns the source image  $k$  with the template image  $k+1$  cropped by the window to arbitrary numerical accuracy set by the optimizer parameters. We configured the *imregtform* optimizer as *monomodal* (images having similar brightness and contrast, captured with the same sensor) and used the following tuning of the optimizer parameters

```
optimizer.GradientMagnitudeTolerance = 1e-7  
optimizer.MaximumIterations = 1000  
optimizer.MaximumStepLength = 0.1  
optimizer.RelaxationFactor = 0.99
```

However, instead of selecting an image subsection for the heat-maps, the motion analysis windows were set to span the whole image. We used the window size of 32 x 32 pixels and windows, laid out every 4 pixels in x- and y-coordinates, filling the original image in a grid-like manner. Much smaller window sizes than this lead to noisier heat-maps, whereas larger window sizes resulted in blurrier heat-maps as the heat-map image pixels became more correlated with their neighbors. The 4-pixel inter-window-distance was the lowest value that still gave reasonable computational times on University's computing cluster.

By estimating all the translations between  $k$  and  $k+1$  frames for  $k=0,1,2,\dots,N-1$ , where  $N$  is the number of images taken during an X-ray flash, we obtained the  $X$  and  $Y$  displacement arrays over

time for each window in pixels. Then the data was converted to directionless mean-square movement values, and finally, these mean square values were presented as N-1 heat-map images using MATLAB's *imshow* function. Clearly erroneous pixels, in which a sudden inter-frame change of tens of pixels or more occurred, were set to zero. Only the final heat-map frame is presented in this paper (excluding the video) since the final frame characterizes the overall displacement within the complete 200 millisecond time duration.

The scripts to process and analyze the X-ray images are downloadable from the repository:

[https://github.com/JuusolaLab/Hyperacute\\_Stereopsis\\_paper/tree/master/AnalyzeMovementData](https://github.com/JuusolaLab/Hyperacute_Stereopsis_paper/tree/master/AnalyzeMovementData)

## II. *In vivo* high-speed optical imaging of photoreceptor microsaccades

### Overview

This section describes the experimental and theoretical approaches to measure photomechanical photoreceptor movements (microsaccades) (3, 4) across the left and right *Drosophila* eye using *in vivo* high-speed imaging. It gives central background information and additional supporting evidence for the results presented in the main paper, including:

- Ommatidial R1-R7/8 rhabdomere patterns across the left and right eyes are mirror-symmetric and aligned so that their R2-R5 axis is largely collinear with frontally expanding optic flow field.
- The left and right eye microsaccades are also mirror-symmetric but generally move along the R1-R2-R3 rhabdomere axis. Therefore, the microsaccade movement directions are determined primarily by the eyes' mirror-symmetric ommatidial ultrastructure that rotates concentrically, as organized developmentally during the eyes' morphogenesis.
- The mirror-symmetric photoreceptor microsaccade directions extend the two eyes' binocular (frontally overlapping) sampling range for stereopsis to about 30°.
- Microsaccades are robust both in the dark- and light-adapted eyes, with light adaptation accelerating their dynamics while retaining contrast sensitivity. At room temperature (~20-22 °C), the microsaccade frequency response can follow contrast modulation at least until ~27-32 Hz.
- During a microsaccade, ommatidial R1-R7/8 move as a single unit. Inside an ommatidium, rhabdomeres are mechanically coupled so that even a single photoreceptor's photomechanical activation alone moves all R1-R7/8 sideways, generating the microsaccade's lateral component.
- All R1-R7/8 photoreceptors in an ommatidium contribute to the microsaccade; the more photoreceptors are light-activated, the larger the microsaccade. Therefore, microsaccades can be used as a metric to quantify the light-activated phototransduction state.
- The *Drosophila* eye is somewhat sensitive to mechanical stress, with accidental denting during *in vivo* preparation making, especially for some mutants and transgenic flies, reducing functional integrity to generate the lateral microsaccade components.
- These findings are consistent with the hypothesis that the eye-location-specific microsaccade movement directions require well-organized interommatidial rhabdomere pivoting (angled anchoring) and mechanical coupling (possibly by inter-rhabdomeric tip-links).
- Finally, during and between experiments, the microsaccades' dynamic variability suggests that a fly's intrinsic activity state – in the form of synaptic feedback signals to the photoreceptors - might further modulate them.

### II.1. Deep pseudopupil imaging (of optically superpositioned photoreceptors)

Photomechanical *Drosophila* photoreceptor movements (3, 4), named *photoreceptor microsaccades* (4), can be viewed non-invasively *in vivo* by observing the eyes' deep pseudopupil (**fig. S10**) (17). Deep pseudopupil is a virtual image of multiple distal R1-R7/8 rhabdomere endings, which align with the angle the eye is observed at while being ~10x-magnified by the ommatidial lens system (**fig. S10A** and **B**) (17). Here we describe how to map such optically superpositioned R1-R7/8 rhabdomeres':

- i. **Angular orientation**
- ii. **Stereo vision range** - the central binocular visual field, which is viewed simultaneously by the corresponding left and right eye photoreceptors
- iii. **Microsaccade movement directions** to light flashes, as delivered at their receptive fields (RFs)

across the *Drosophila* eyes.

Because R8 rhabdomere lies directly underneath R7 in optical superposition with neighboring ommatidia' R1-R6 and contributes to photoreceptor microsaccades (see **Section SII.8**, below), we consider and call the deep pseudopupil rhabdomere pattern as R1-R7/8.

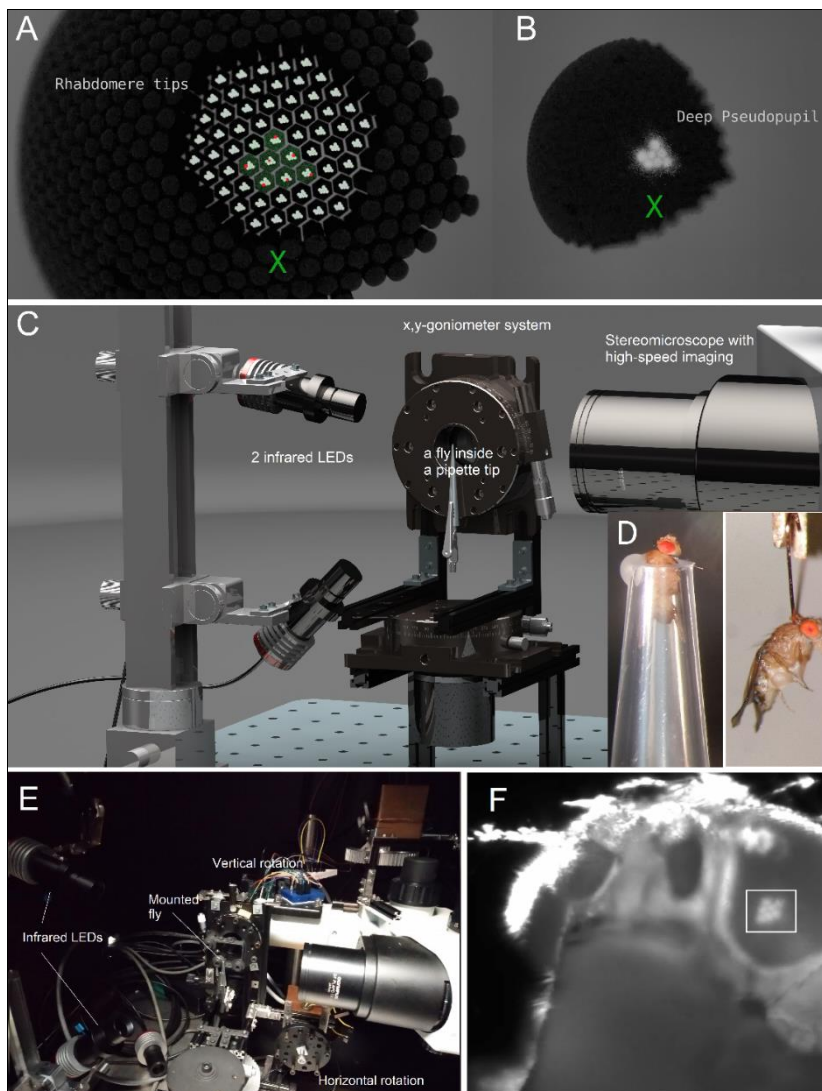

**Fig. S10. Imaging deep pseudopupil and photoreceptor microsaccades with the goniometric system.**

(A) R1-R7/8 photoreceptor rhabdomere tips (white dots) centered in hexagonal ommatidia that tile the right *Drosophila* eye. The red R1-R7/8 rhabdomeres inside the green-tinted ommatidia are in optical superposition (with R7 on top of R8). These rhabdomeres point to the same small area in the visual space and respond only to incident light changes (green X) at that visual area.

(B) The optically superimposed rhabdomeres form a deep pseudopupil (DPP) virtual image (17), which is ~10x-magnified by the ommatidial lens system, and their light-activation generates a DPP photoreceptor microsaccade. See **Movie S3** and **S4**.

(C) The deep pseudopupil of local photoreceptor rhabdomeres were observed and recorded across the fly eyes *in vivo* by combining trans-

cutaneous infrared back-illumination, which the flies cannot see, with their goniometric x,y-rotation under a long-working-distance microscope imaging, using a high-speed camera system. In the same experiments, the DPP photoreceptors could also be light-activated by delivering UV- or green-

stimulation through the microscope optics at the center of their receptive fields (RFs), evoking photomechanical DPP photoreceptor microsaccades.

(D) Goniometric DPP imaging was performed both from pipette-tip-held and tethered *Drosophila* preparations (with legs and wings either wax-restrained or not), in which the fly head was fixed immobile.

(E) A side-view of the goniometric high-speed imaging system, which enabled us to systematically map the DPPs, stereoscopic range, and microsaccade dynamics across the fly eyes.

(F) IMSOFT software was used to record the exact angular camera position in respect to the recorded DPP images, needed for mapping the DPP orientation, stereoscopic range, and microsaccade movement directions across the fly eyes.

Head-fixed living intact *Drosophila*, either held inside a "cut-to-fit" pipette-tip or tethered to a small hook (see **Section II.4.**, below), were connected to the center of a custom-made goniometric stage (**fig. S10C to E**) for precise x,y,z-positioning and rotation in both the horizontal and vertical axes. A fly's fine positioning could be set either by remote-controlled stepping motors or manually. During the positioning and later high-speed imaging, each fly was monitored under antidromic infrared (IR) light, which *Drosophila* cannot see (15) but high-sensitivity CMOS camera sensors detect readily. This back-illumination through the fly head was delivered by two 850 nm LEDs (powered by a Cairn Research optoLED driver, UK), mounted on a separate x,y,z-adjustable positioning arm (**fig. S10C and E**).

### **II.1.i. Mapping deep pseudopupil angular orientation across the eyes**

A fly's exact position was recorded using two 1,024-step rotary encoders (E6B2-CWZ3E, YUMO, China) connected to the open-source electronics platform Arduino microcontroller (Italy) and fed into a computer running the IMSOFT software (Joni Kempainen, 2019-21). Each fly was centered by its eyes at both 0° and -90° vertical rotation, and the vertical rotation reference point was where the left and right eye pseudopupils align with the antennae pedicels. We first examined its deep pseudopupil microsaccades to UV and/or green flashes. If these occurred, indicating that the preparation had no apparent structural eye damage (see **Section II.4.**, below), it was rotated through the horizontal x-axis at 0° y (vertical), with imaging – either with or without light-stimulation - being triggered every 10° from -50° to +40° (x-range). Further horizontal-range imaging was carried on for every 10° of vertical rotation, covering -110° to +110° (y-range), until it was impossible to see the deep pseudopupil. During imaging, the flies were shielded from ambient light by a black-painted Faraday cage and lightproof curtains. The experiments were conducted at room temperature (~20-22 °C).

We imaged the deep pseudopupils across the fly eyes using an Olympus SZX12 stereomicroscope with a long-working-distance DF PLAPO 1x objective (**fig. S10C and E**) of 0.11 numerical aperture (NA). IR-images were recorded using an Orca Flash 4.0 CMOS V3 video camera (Hamamatsu, Japan) at 100 frames/s, outputting 1024 x 1024 pixels at 2 x 2 binning. The camera was computer-controlled by the IMSOFT software (**fig. S10F**), allowing for experimental parameter modifications.

Ultrastructurally, the R1-R7/8 rhabdomere patterning inside ommatidia, and thus their deep pseudopupils (with R7 endings concealing R8s below), are mirror-symmetric both vertically (between the left and right eye) and horizontally (along the equator, dividing the dorsal and ventral eye halves (14, 58)) (**fig. S11**). Using goniometric imaging, we further quantified how the

ommatidial R1-R7/8 rhabdomere patterns align across the eyes. The local rhabdomere orientation, which was defined as the rotation of the angle between R3-R2-R1 (yellow line) and R3-R4-R5 (green), shifts gradually and systematically, generating the characteristic mirror-symmetric global map for the left and right eyes. The map reveals that rhabdomeres align locally to follow a global concentrically expanding diamond-shape pattern, suggesting that their orientation at each eye position is fixed developmentally to the corresponding frontally expanding optic flow field.

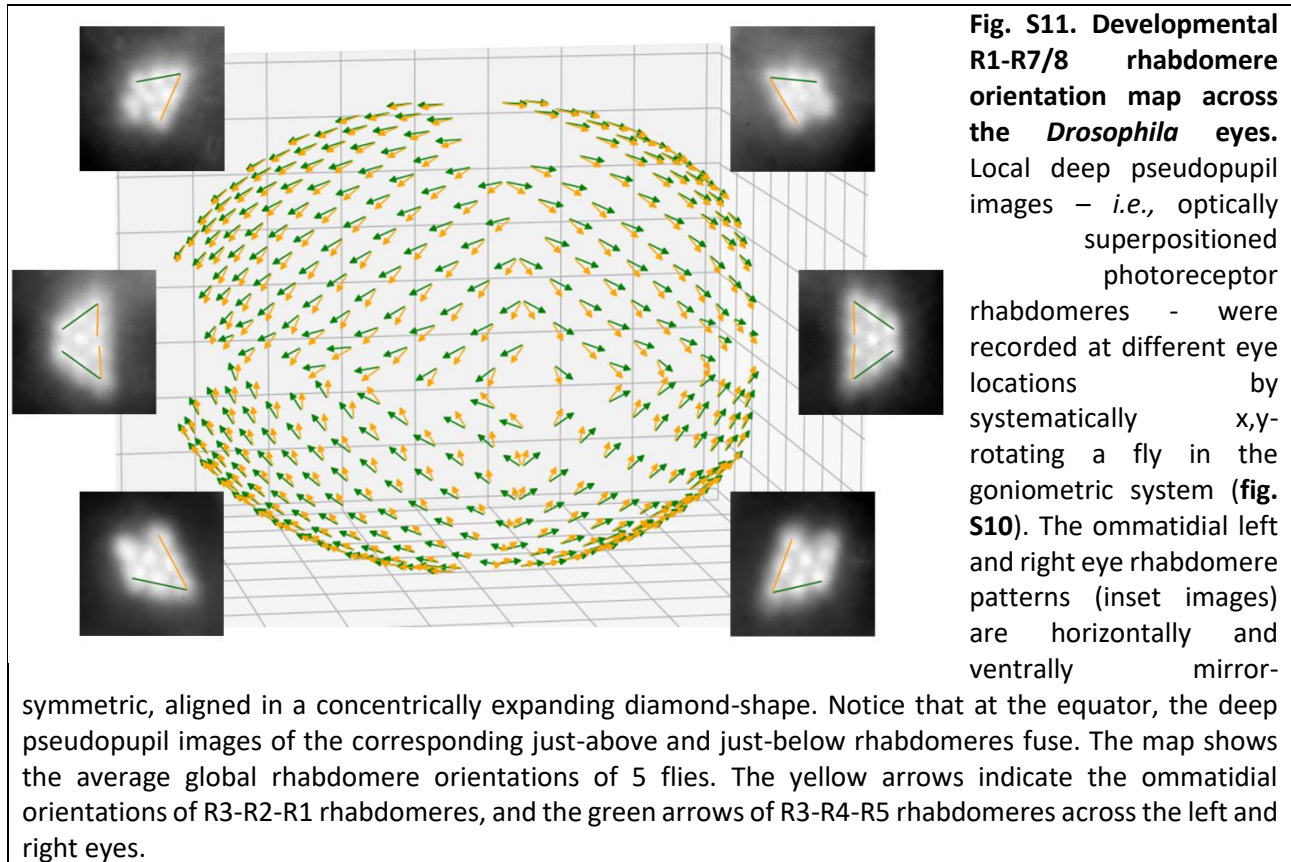

Therefore, we further computed how accurately the local ommatidial rhabdomere orientations across the two eyes align with the concentrically expanding optic flow field, which they would face in a forward flight (**fig. S12**). Characteristically, when flying forward, the fly head is at an upright posture, having a  $10.1^\circ$  backward tilt (**fig. S12D**). The calculations included this slight tilt.

For each recorded eye position, we first compared the corresponding optic flow field direction (**fig. S12A**, purple arrows) to the measured deep-pseudopupil R1-R7/R8 rhabdomere pattern orientation (**fig. S12B**). Then, we performed a global search for the fixed angle, in which the optic flow lines cut the R1-R7/R8 rhabdomere pattern orientation across all recorded eye positions with minimum error (**fig. S12C**). In nearly every position, the optic flow lines - as these curve around the two eyes - cut their rhabdomeres primarily along the R2-to-R5 axis (**fig. S12D**), with only 15.6% mean error over the entire global map. This analysis established that ommatidial rhabdomeres rotate during development so that their R2-to-R5 axes align collinearly with the local optic flow axes, as experienced in a forward flight. Video-file showing the analyses can be downloaded from:

[https://github.com/JuusolaLab/Hyperacute\\_Stereopsis\\_paper/tree/master/AnalyzeMovementData](https://github.com/JuusolaLab/Hyperacute_Stereopsis_paper/tree/master/AnalyzeMovementData)



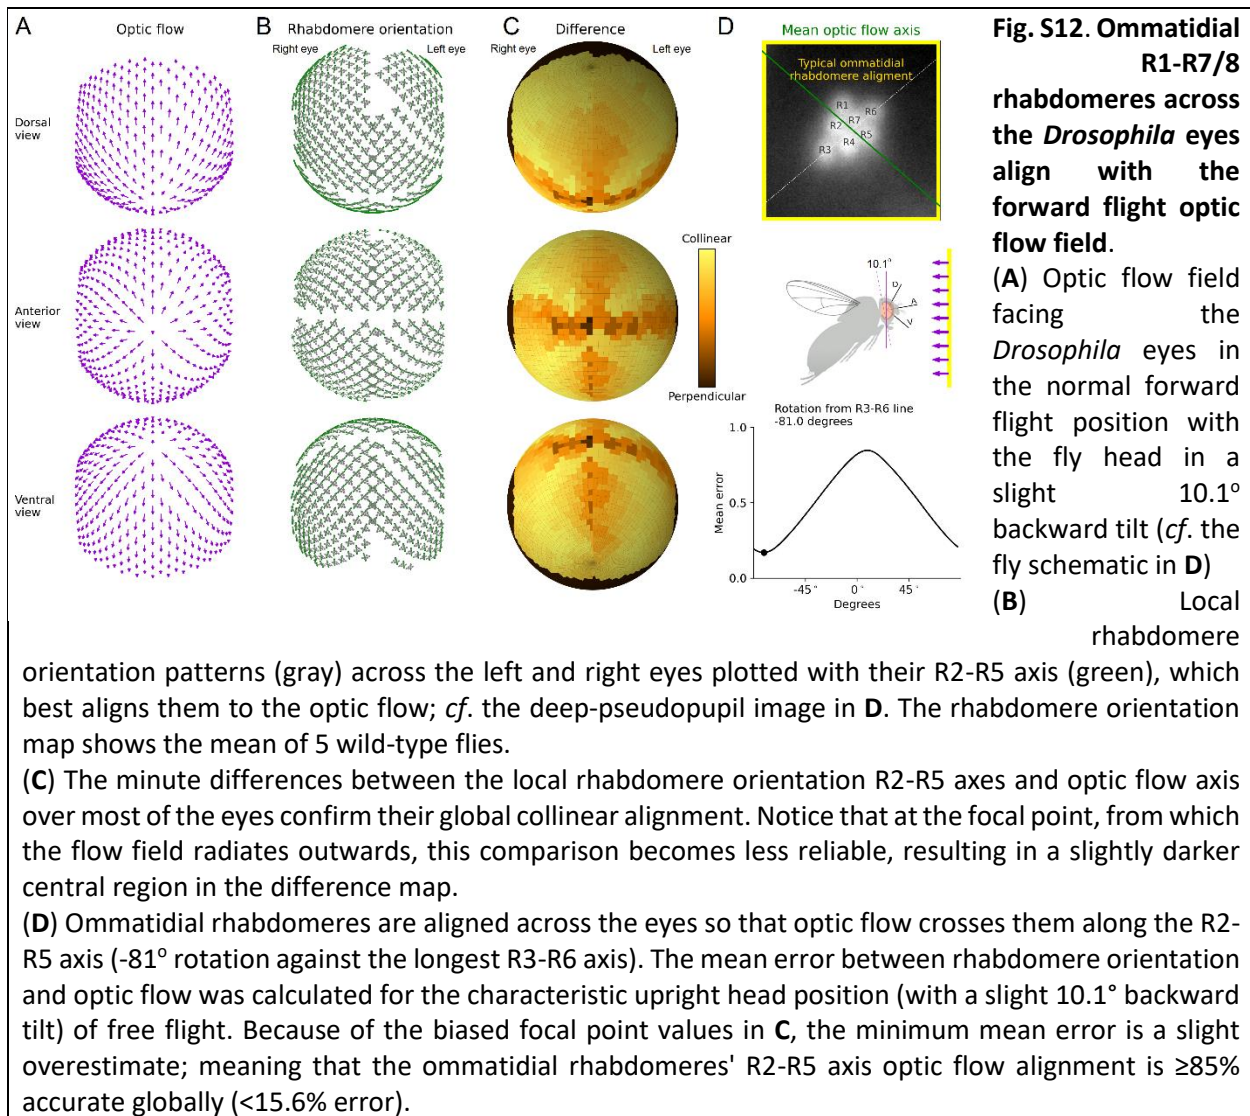

### II.1.ii. Mapping *Drosophila*'s stereo vision range

By knowing the exact angular camera position regarding the left and right eye deep pseudopupil images, we could further use the scanned images across the eyes to generate a map of the field of view shared by both eyes (**fig. S13**). This optically measured frontal binocular range gives the angular x,y-limits of a fly's potential stereo vision. **Movie S3** shows how the goniometric deep pseudopupil imaging was used to map the eyes' binocular stereo range in relative darkness; *i.e.*, having no visible light stimulation. Notice also in the Movie how the rhabdomeres' angular orientation shifts systematically with eye location, following the developmental R1-R7/8 rhabdomere orientation map (*cf.* **fig. S11** and **fig. S12B**).

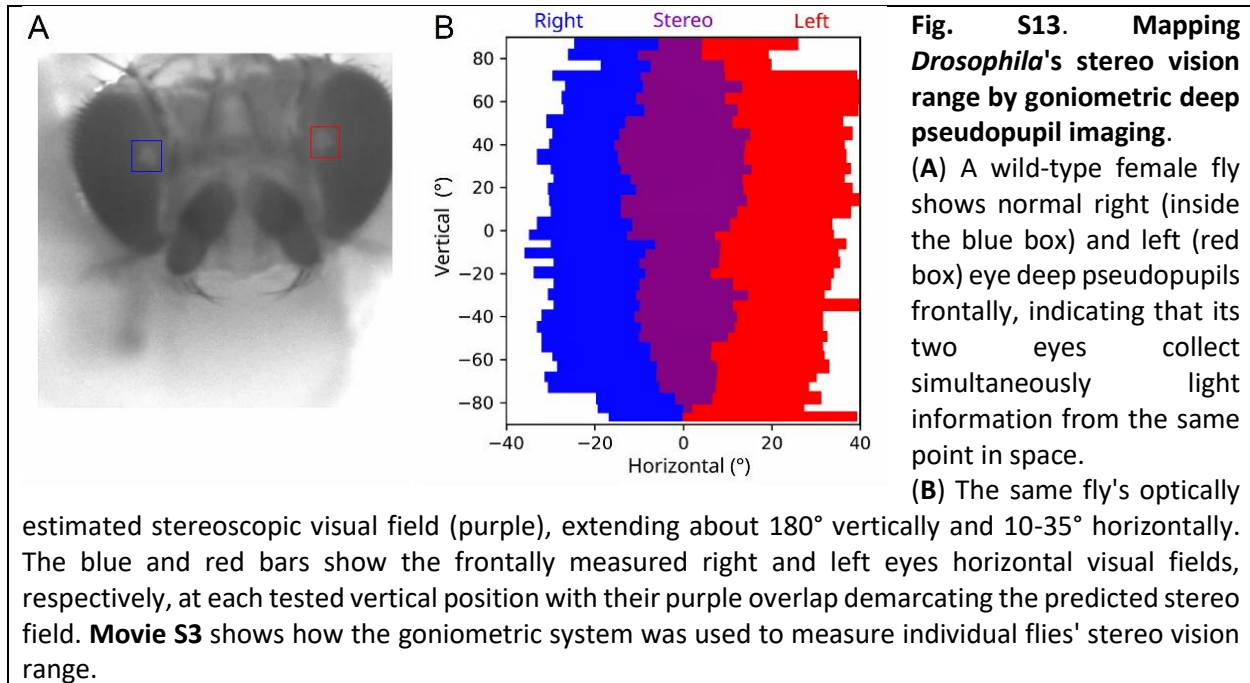

We tested experimentally (**fig. S14**) and through computer simulations (**Section II.2**) the possibility that the numerical aperture (NA) of the used microscope biases the estimated stereo range. In the former, one fly's stereo range was measured repeatedly under three different NA configurations of 0.11, 0.054, and 0.015 at a fixed vertical rotation (**fig. S14C**). Only the 0.015 NA resulted in smaller range estimates (**fig. S14D**; t-test  $p = 1$  and  $p = 2.09 \times 10^{-3}$ ), but this is probably a side effect caused by the reduced image quality that makes it harder to separate the deep pseudopupil edge from the eye edge visually.

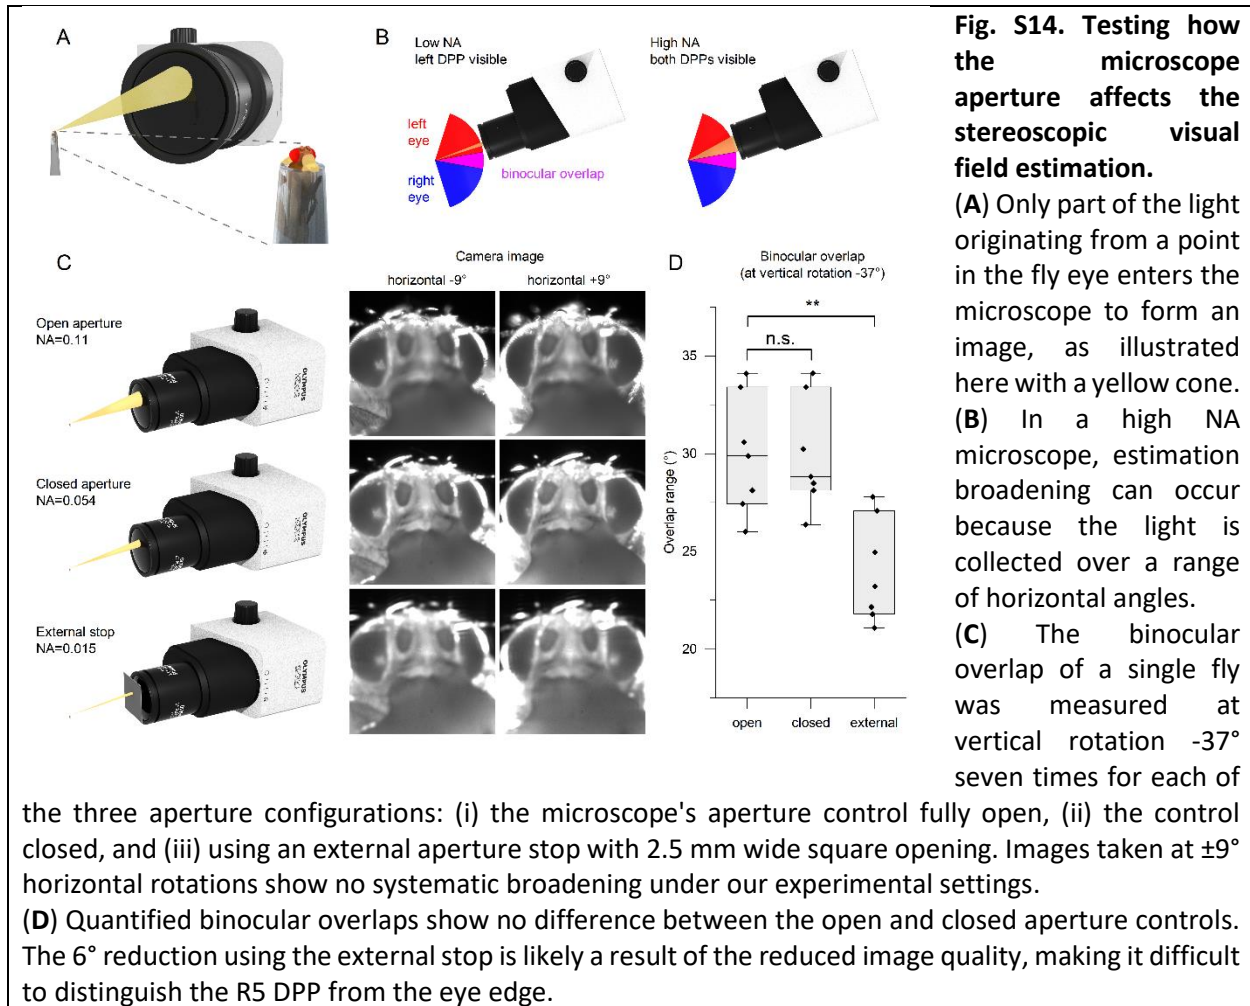

### II.1.iii. Mapping microsaccade movement directions across the eyes

We recorded *Drosophila* photoreceptors' deep pseudopupil microsaccades to 200-ms-long 365-385 nm UV- and 546 nm green-LED flashes. The LEDs were mounted and centered in the microscope's eyepiece socket, which through the microscope head's dichroic mirror (image splitter) shared the same "best-focused" deep pseudopupil image with the camera. At this point, all ommatidia's optical axes converge to the eye's center of curvature (14). Therefore, the axially centered light stimulation was delivered through the microscope optics at the receptive fields (RF) of those R1-R7/8 rhabdomeres, which were in optical superposition. During stimulation, 20 images (at 100 frames/s) were taken by IMSOFT and saved in the TIFF format.

Scanning the deep pseudopupil microsaccades across the eyes revealed that their lateral (sideways) movement components, as measured at each corresponding left and right eye locations, are mirror-symmetric, confirming the X-ray imaging results (see **Section I.**, above). To further analyze factors contributing to their local dynamics, we performed a minimum error search, where we compared the global microsaccade movement direction map to the corresponding global photoreceptor orientation map (**fig. S15**). This analysis established that R1-R7/8 photoreceptors in most ommatidia across the eyes move collinearly back-and-forth (during their photomechanical activation and recovery phases; see **Section II.7.**, below) approximately along the R1-R2-R3

rhabdomere orientation axis (**fig. S15D**). A video showing the analyses is downloadable from: [https://github.com/JuusolaLab/Hyperacute\\_Stereopsis\\_paper/tree/master/AnalyzeMovementData](https://github.com/JuusolaLab/Hyperacute_Stereopsis_paper/tree/master/AnalyzeMovementData)

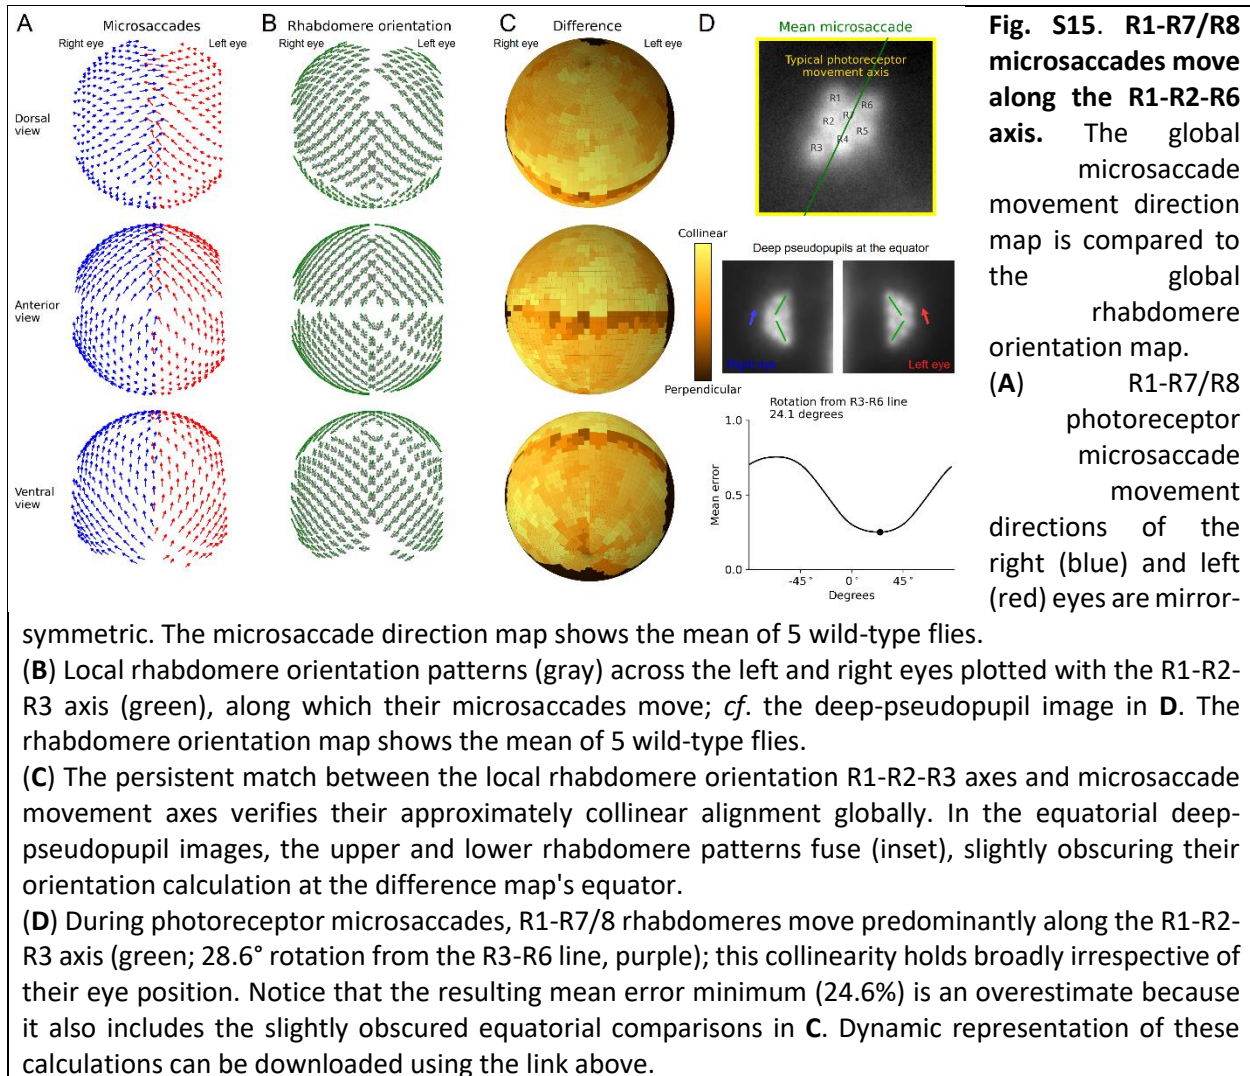

Collectively, these results (**fig. S11 to S15**) strongly suggest that:

- The lateral microsaccadic movement component inside each ommatidium happens along some structural (developmentally-set) lowest resistance (energy minimum) R1-R7/8 anchoring.
- These movements were practically free of spontaneous intraocular muscle activity, which otherwise would have distorted their local and global mirror-symmetry.

**Image analysis.** Imaging data were analyzed using a custom-made deep pseudopupil analyzer program (Joni Kemppainen, 2019-21). This program performed image cross-correlation analyses (4) to quantify the photomechanical microsaccade sizes, temporal dynamics, and moving directions. These data could then be extracted and plotted in other software packages.

**Cross-correlation analysis.** Photomechanical microsaccades were analyzed from high-speed videos using cross-correlation analysis as described earlier (4). 2D cross-correlation was calculated between each frame and the reference frame, typically the frame before the stimulus. Weighted means in x- and y-direction were calculated from each 2D cross-correlation results, which were  $\geq 95\%$  of the maximum (peak) value. Lastly, the reference frame cross-correlation x- and y-positions were subtracted from each frame, giving their difference to the reference frame.

The scripts to process and analyze the images are downloadable from the repository:

[https://github.com/JuusolaLab/Hyperacute\\_Stereopsis\\_paper/tree/master/AnalyzeMovementData](https://github.com/JuusolaLab/Hyperacute_Stereopsis_paper/tree/master/AnalyzeMovementData)

## II.2. Computer simulations of deep pseudopupil imaging

Computer simulations were used to test how the microscope system's numerical aperture (NA) affects the infra-red deep pseudopupil imaging, especially how the NA influences the number of ommatidia contributing to the deep pseudopupil image and how a high NA can lead to overestimation of the binocular overlap.

A microscope system's numerical aperture (NA) is a dimensionless number that characterizes the range of angles over which it can accept light. For the infra-red deep pseudopupil imaging, NA optically limits the ommatidial area wherein the optically superimposed rhabdomeres can be pooled into the pseudopupil image. Most stereomicroscopes with their long-working distance objectives typically have relatively low NAs ( $\leq \sim 0.2$ ). The NA is defined as

$$NA = n \sin \theta \quad (5)$$

where  $n$  is the index of refraction (IOR) for the used immersion medium ( $n=1$  in the air), and  $\theta$  is the half-angle subtended by the microscope lens at the viewed object (59). In binocular overlap, a simple geometrical consideration suggests that the overlap can be theoretically overestimated by  $2\theta$ . In practice, however, the left-eye-right-eye symmetry during the horizontal rotation is such that the circular aperture collects less light from the horizontal extremes of the entrance pupil, and these extreme or high order light rays contribute relatively little to the formed image.

The f-number or the f-stop,  $N$ , is defined as:

$$N = \frac{f}{D} \quad (6)$$

where  $f$  is the focal length, and  $D$  is the used objective's effective aperture (entrance pupil diameter). The image depth of field increases with f-number. For a point-like object at distance  $d$  from the entrance pupil, it follows from Eq. 5 and Eq. 6 that

$$NA = \sin \left( \tan^{-1} \left( \frac{f}{2dN} \right) \right) \quad (7)$$

We used this equation to calculate the used numerical apertures in the computer simulations.

The computer simulations were implemented as a ray-traceable 3D computer graphics (CG) model of the fly eyes capable of producing the deep pseudopupil as an optically emergent feature the

same way the real fly eyes do. The CG-eye-model was fully parametric and script initialized, making it easy to translate the model for other insect species, for example. Another advantage of the CG-approach is that because the 3D models are primarily collections of numerical data about the vertices and faces, they are naturally independent of the rendering engine or the modeling software, making it relatively easy to import the CG-eye model in any other software.

The CG-eye model's main building block was a simplified ommatidium with a facet lens, cylindrical R1-R7/8 rhabdomere tips, a basement membrane segment, and simplified screening pigments (**fig. S16A**). The CG-ommatidium was generated using the open-source graphics software Blender 2.8 (<https://www.blender.org/>) and its built-in Python interface for scripting. The facet lens was modeled as a double convex lens with a lens diameter of  $16\ \mu\text{m}$  and a curvature radius of  $11\ \mu\text{m}$ , and a lens thickness of  $8\ \mu\text{m}$ , as described before (60). The rhabdomere tips were  $3\ \mu\text{m}$  long, simplified circular cylinders with a  $1.9\ \mu\text{m}$  diameter for the R1-R6 and a  $1.0\ \mu\text{m}$  diameter for the central R7/8, placed on the retinal plane locations quantified from a retinal electron micrograph (**Table S1**). The rhabdomere tips were placed  $21\ \mu\text{m}$  apart from the facet lens center point. We modeled the screening pigments as a hollow, thin-walled hexagonal cylinder with a  $16\ \mu\text{m}$  radius, spanning from the lens to the basement membrane. Finally, the basement membrane segment was modeled as a thin hexagonal plate with a  $16\ \mu\text{m}$  radius.

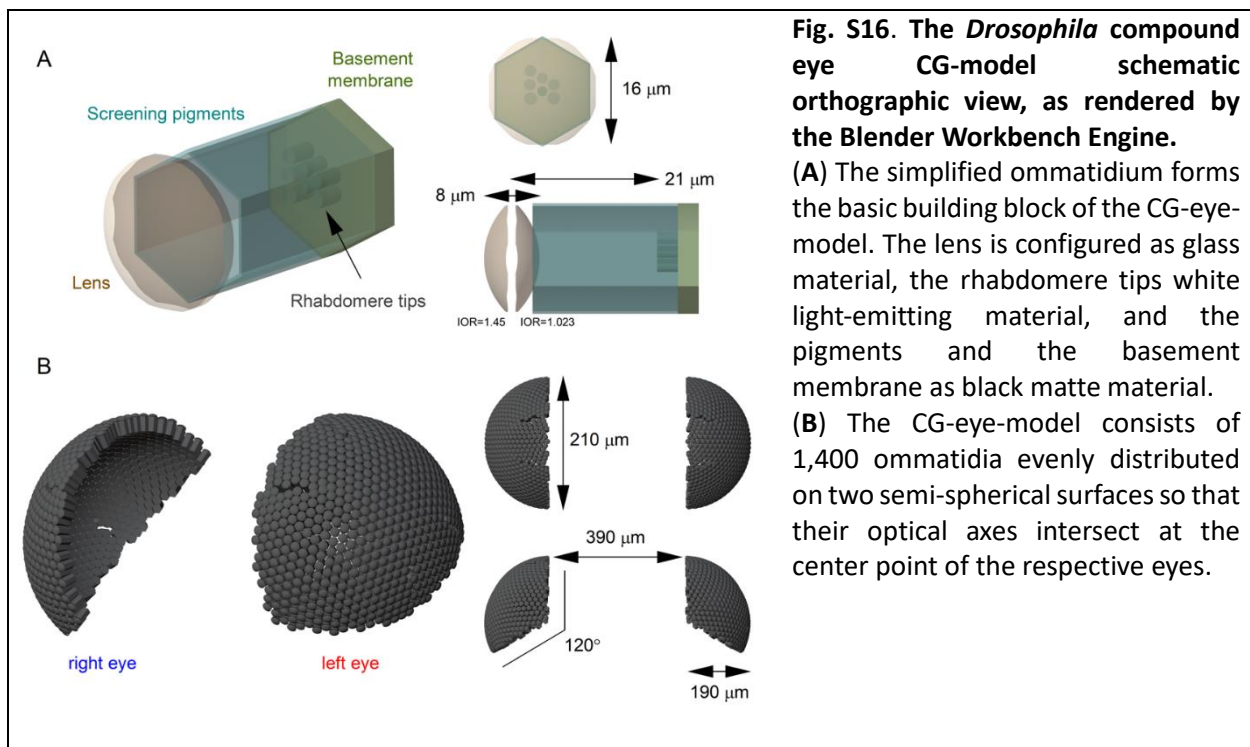

**Table S1.** Rhabdomere (x, y) locations in the CG-model's retinal plane (see **fig. S42A**).

| Rhabdomere | x ( $\mu\text{m}$ ) | y ( $\mu\text{m}$ ) |
|------------|---------------------|---------------------|
| R1         | -1.6881             | 1.0273              |
| R2         | -1.8046             | -0.9934             |
| R3         | -1.7111             | -2.9717             |
| R4         | -0.0025             | -1.9261             |
| R5         | 1.6690              | -0.9493             |
| R6         | 1.6567              | 0.9762              |
| R7/8       | 0.0045              | -0.0113             |

To proceed from one ommatidium to many, we evenly distributed a realistic amount of the CG-ommatidia across two skewed semi-spherical surfaces with a long radius of 210  $\mu\text{m}$  and a short radius of 180  $\mu\text{m}$ , that were 390  $\mu\text{m}$  apart from each other's center points (**fig. S16B; Fig. 1C**). At the medial edge of the left and right eyes where binocular overlap occurs, the contralateral ommatidia were at most parallel, meaning that the outwards projected ommatidial optical axes of the contralateral eyes never intersected but diverged. The inferior eye edge, which is the eye edge next to the thorax, was defined by the principle that no ommatidial axis should make an angle larger than 120° from the top in the coronal plane. Finally, we also considered the dorsal-ventral midline, where the rhabdomere pattern on the dorsal side appears as a mirror version of the ventral side and vice versa. Overall, this somewhat simplified eye assembly lead to a quite realistic outcome.

To simulate light propagation in the model, we used the physically based, unbiased, ray-tracing render software LuxCoreRender 2.4 and its Blender plugin BlendLuxCore (<https://luxcorerender.org/>). The render engine successfully simulates light refraction on the facet lenses leading to the deep pseudopupil virtual image formation under the right viewing conditions. We configured the material output node for the facet lenses as glass material and used the index of refraction (IOR) of 1.450 for the outer lens surface and 1.023 for the lens inner surface to match the real IOR values of 1, 1.45, and 1.34 for the air, lens and crystalline cone volumes (60). The rhabdomere tips were configured as white matte material with white light emission to mimic the antidromic illumination. The screening pigments and the basement membrane hexagons were configured as matte material of absolute black to absorb any incident light. Bi-directional ray tracing with the Metropolis sampler and a 3-samples-per-frame halt condition were used for rendering. To observe the CG deep pseudopupil, we enabled the camera's depth of field option with a sufficiently small f-stop value and set the focus at the converging point of the ommatidial axes.

To illustrate the rhabdomere or deep pseudopupil microsaccades, we used real microsaccade direction data acquired in the goniometric deep pseudopupil light-flash experiments. For each CG-ommatidium, the nearest microsaccade direction available in the dataset was used to set the animation start and end locations using the programmable keyframe animations in Blender. In some of the images and videos, we also used blue and red beams projecting from the rhabdomere plane to illustrate how the contralateral receptive fields move and intersect during microsaccades. This effect was achieved by placing two spotlight sources, each with a 45° emission angle, in the rhabdomeric plane of two contralateral R6 rhabdomeres. Also, a light scattering volume was added outside the eyes to make the beams visible.

The CG eye model is publicly available at the git repository:

[https://github.com/JuusolaLab/Hyperacute\\_Stereopsis\\_paper/tree/main/CG-Compound-Eye](https://github.com/JuusolaLab/Hyperacute_Stereopsis_paper/tree/main/CG-Compound-Eye)

In the NA simulations, we systematically changed the virtual imaging system's NA and f-number to survey how these parameters:

- Contribute to optical pooling the ommatidial rhabdomeres' deep pseudopupil images.
- Affect the eyes' binocular range estimates.

In the NA binocular overlap simulation, the camera was placed 10 mm far apart from the eyes' center point and set to have a focal length of 10 mm. We used F-stop values of 3, 10, 30, 100 and 300 that correspond to NAs of 0.164, 0.0499, 0.0167, 0.00500 and 0.00167, respectively (Eq. 7). During video rendering, the camera was slowly horizontally rotated from  $-45^\circ$  to  $+45^\circ$  as in the binocular overlap estimation experiments. A video showing the analyses is downloadable from:

[https://github.com/JuusolaLab/Hyperacute\\_Stereopsis\\_paper/tree/main/CG-Compound-Eye](https://github.com/JuusolaLab/Hyperacute_Stereopsis_paper/tree/main/CG-Compound-Eye)

In the numerical aperture (NA) simulation (**fig. S17**), we illuminated only selected CG-model ommatidia and observed the emerged deep pseudopupil pattern when viewed with a high NA and a low NA microscope. In Blender, both cameras were configured to an f-stop value of 1.0, and they were 1 mm away from the eye's center point, at which the camera focus was set. We varied the focal length parameters to change the NA. The high NA camera had a focal length of 0.5 mm, and the low NA camera a focal length of 0.1 mm. These values correspond to NAs of 0.243 and 0.0499, respectively (Eq. 7).

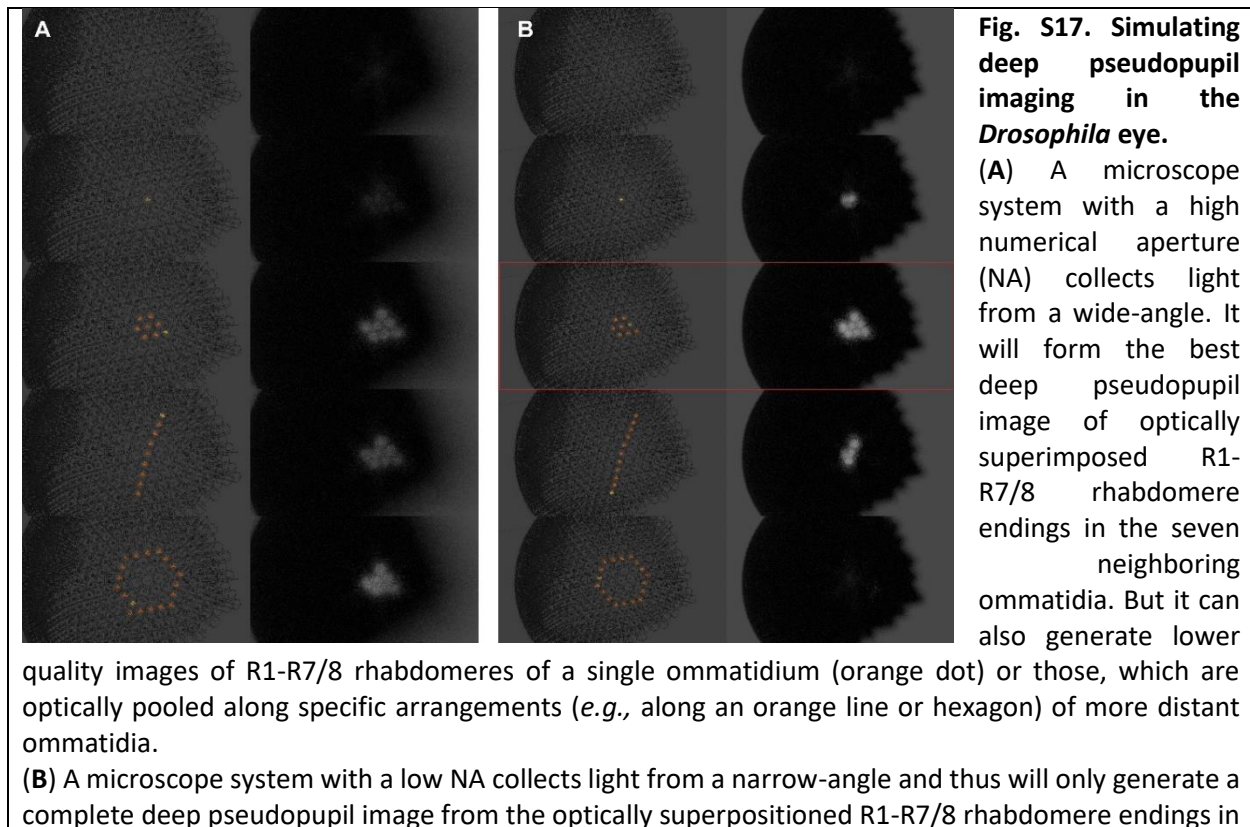



the seven neighboring ommatidia. Red rectangle: a typical stereomicroscope with a relatively low NA (<0.2) would collect a deep pseudopupil image only from the neighboring seven ommatidia.

In light of the simulation results (**fig. S17**), given that our stereomicroscope system had a NA of 0.11 (see **Section II.1.**, above), it is highly probable that the observed deep pseudopupil images in each eye were primarily pooled from the seven nearest neighbor ommatidia (**fig. S17B**), in which R1-R7/8 rhabdomeres were in optical superposition (images inside the red rectangle). Therefore, the estimated stereo vision range and rhabdomere orientation maps (**Section II.1.**, above) are likely to be accurate; not over- or underestimates biased by this new high-speed imaging method and its instrumentations' physical limitations.

### II.3. ERG recordings

Head-fixed *Drosophila*, either inside a pipette-tip or tethered to a small hook (see **Section II.6.**, below), were connected to the center of a custom-made electrophysiological setup (49, 61). Blunt (low resistance) filamented borosilicate glass microelectrodes (0.5 mm inner and 1.0 mm outer diameters) filled with fly Ringer (containing in mM: 120 NaCl, 5 KCl, 10 TES, 1.5 CaCl<sub>2</sub>, 4 MgCl<sub>2</sub>, and 30 sucrose) were attached to electrode holders (containing a chloridized silver wire) and connected to a microelectrode amplifier (model SEC-10L; npi Electronic, Germany). (13). Using micromanipulators, we carefully placed the recording electrode on the eye and the reference electrode elsewhere on the fly head. Using the setup's Cardan-arm system, we fixed the fiber-optic-end of the LED light source in a predefined x,y,z-position above the fly head, directly stimulating the eye's anterior-dorsal part. The eye's voltage responses were then recorded to 1-s-long bright Green (546 nm) and UV (365 nm) pulses separately.

### II.4. Microsaccade and ERG recordings from the same flies

We tested whether the used fly head immobilization methods affect the fly eyes' deep pseudopupil microsaccades and ERG responses to the UV- and green test light flashes (**fig. S18**). To ensure ocular recording stability, 3-to-10-days-old *Drosophila* were either:

- *affixed inside a pipette-tip or a metal holder cone* from the head cuticle and proboscis (13, 49)
- *tethered to a small hook from the head/thorax's dorsal side*, similar to the flight simulator experiments (15), except that here their legs and wings were immobilized by waxing.

If performed correctly, the tethering method avoided any mechanical stress to the eyes that could result from pressure experienced while being pushed through the pipette/cone. Nevertheless, for most experiments, we used the pipette-tip fixation method because it was easier and faster to perform, and it effectively reduced sporadic muscle-induced retinal movements (4).

Either way, practice improved the microsaccade recording success rates, which for the wild-type flies approached 100%. Yet, for specific transgenic flies and mutants, such as the UV-flies and *hdc<sup>JK910</sup>*, the rates were consistently lower for the pipette-restrained than tethered flies. Therefore, we conclude:

- The *in vivo Drosophila* preparation is structurally fragile to mechanical stress, with genetic manipulations/mutations reducing its eyes functional integrity to generate photomechanical microsaccades' *lateral component* (sideways movement)

- The observed fly-to-fly amplitude variations in their microsaccades' *lateral component* (**fig. S18B** and **fig. S19A**) must, in part, reflect the preparation quality. But it may also partly signify synaptic feedback strength (13, 26, 28, 29, 62) - top-down signaling from the brain (34), reflecting each fly's intrinsic activity state or attentiveness during the experiments. For example, *dSK*-mutants' intracellular R1-R6 photoreceptor voltage responses are faster and smaller than wild-type flies because they receive tonic feedback overload from visual interneurons (62, 63). Correspondingly, their photoreceptor microsaccades are also faster and smaller (see **Section II.8.i.** and **fig. S27B**, below).
- The photomechanical microsaccades' *axial component* is more robust against mechanical stress, as it is readily observed *ex vivo*, even in fully dissociated ommatidia (3, 4).

In contrast, the ERG responses of the same flies, as recorded separately from both their left and right eyes (**fig. S18C**), showed invariably characteristic extracellular voltage responses to the test flashes (practically 100% success rate), irrespective of whether their eyes showed the microsaccadic sideways movement or not. This finding is consistent with the hypothesis that the microsaccades' lateral component requires interommatidial rhabdomere pivoting and mechanical coupling (such as tip-links; see **Section II.8.**, below).

Together the microsaccade and ERG recordings showed that the dark-adapted pipette-tip-fixed and tethered flies - having their legs and wings immobilized by beeswax - generated similar (equally strong) photoreceptor responses to temporal light pulses (**fig. S18B-C** and **fig. S19A-B**). Some suggestively larger ERGs were measured from a few individual tethered flies, which had mobile legs and wings. This finding is consistent with the earlier observations about extracellular neural activity differences (local field potentials and spiking) in the *Drosophila* visual system during resting and flying (34), but we did not investigate it further here.

Crucially, the microsaccade and ERG amplitudes scaled with the number of light-activated photoreceptors within an average ommatidium, being the largest in the wild-type eyes when all R1-R7/8 were activated (**fig. S18B-C** and **fig. S19A-B**). This strong correspondence means that both the microsaccade and ERG responses would directly signal the underlying photon sampling and phototransduction processes. These results made it very likely that photoreceptor microsaccades would have also happened at least equally well during the *in vivo* two-photon  $\text{Ca}^{2+}$ -imaging (see **Section III**, below) and flight simulator experiments (see **Section VI**, below), both of which used tethered flies but without waxing their wings and legs, thereby providing them with a higher degree of mobility.

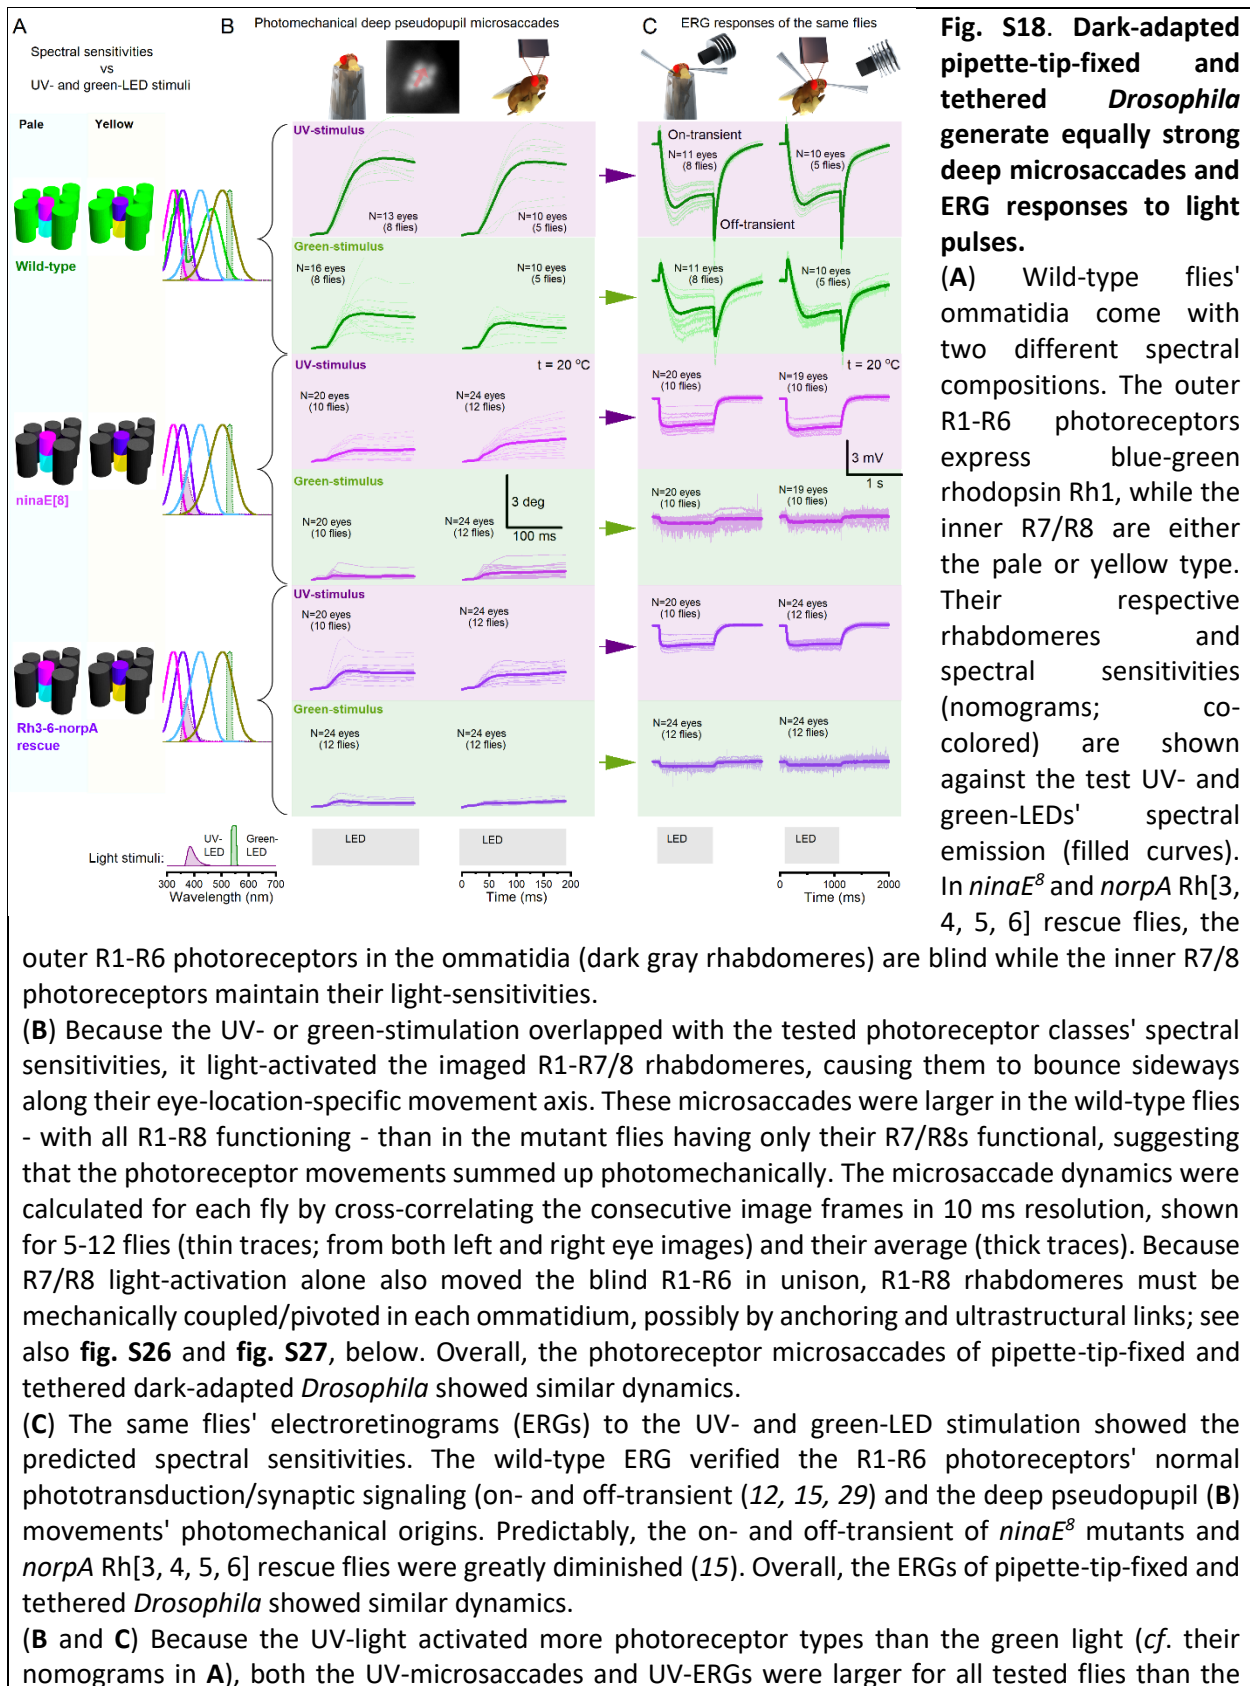

green ones. The ERG light stimulation was ~10-fold weaker than the stimuli in pseudopupil experiments, measured by a spectrometer. The tethered *Drosophila* had wax-restrained legs and wings.

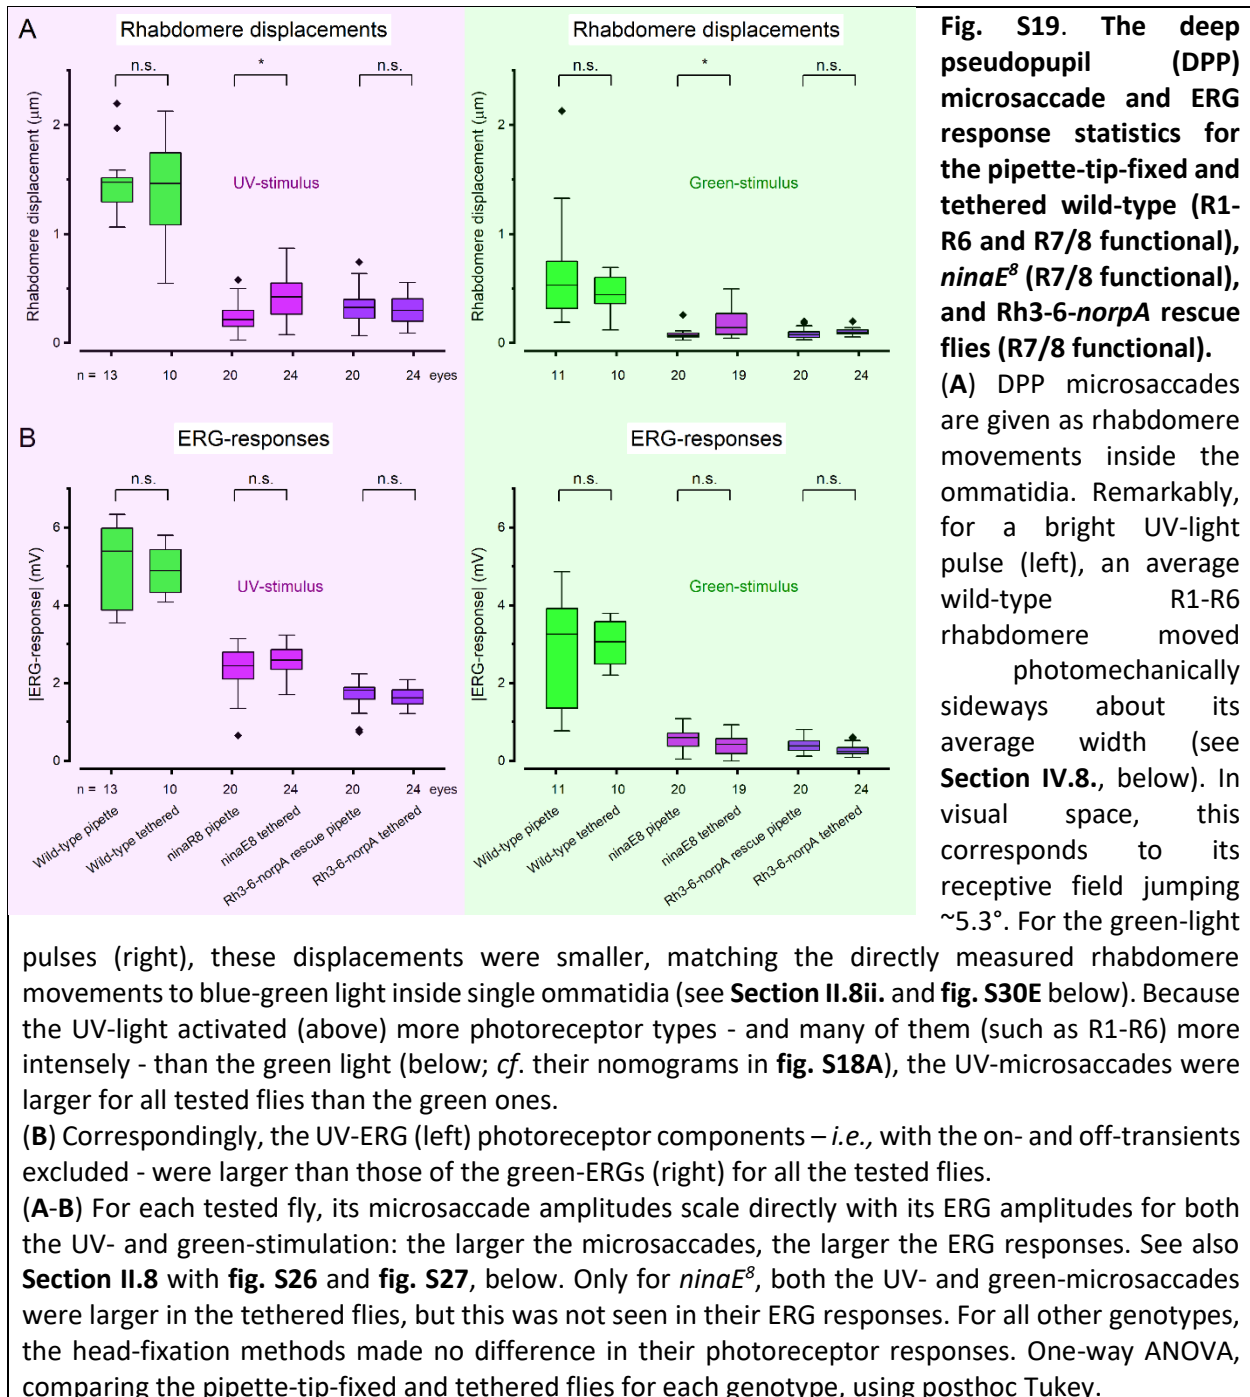

## II.5. Separating photoreceptor microsaccades from eye-muscle activity

When monitoring the wild-type and mutant flies' deep pseudopupils, one sees - from time to time - them shifting position or moving slightly, caused by intraocular muscles nudging the whole retina around (6). While this intrinsic activity (4, 6, 7) likely contributes to *Drosophila's* active gazing

strategy (6, 7) and spatial awareness, it is mechanistically separate from the local photomechanical photoreceptor microsaccades (4) and can interfere with the microsaccade recording. Fortunately, immobilizing a fly - with the beeswax cross-bridging its head and stretched proboscis to the pipette/holder rim (4, 49, 61) - reduces intraocular muscle activity, essentially eliminating spontaneous retinal movements. When carefully prepared, most pipette-restrained flies showed highly reliable and consistent photomechanical microsaccades. Moreover, similar to the tethered fly recordings, because the microsaccades were precisely timed to the light input, if needed, we could afterward exclude any traces with spurious dynamics attributable to intermixing intraocular muscle activity. Thus, those odd (very few) recordings, which showed intraocular muscle activity parallel with photomechanical photoreceptor contractions, were disregarded from the analyzed data.

Importantly, since the microsaccades of the synaptically-decoupled (fig. S2D), and thus behaviorally blind (see Section VI.6, below),  $hdc^{JK910}$  control flies followed the wild-type-trajectories (fig. S20), the observed dynamics (Movie S4) did not involve intraocular muscles. These results further concur with the corresponding wild-type and  $hdc^{JK910}$  X-ray microsaccade imaging results (see Section I.3, above).

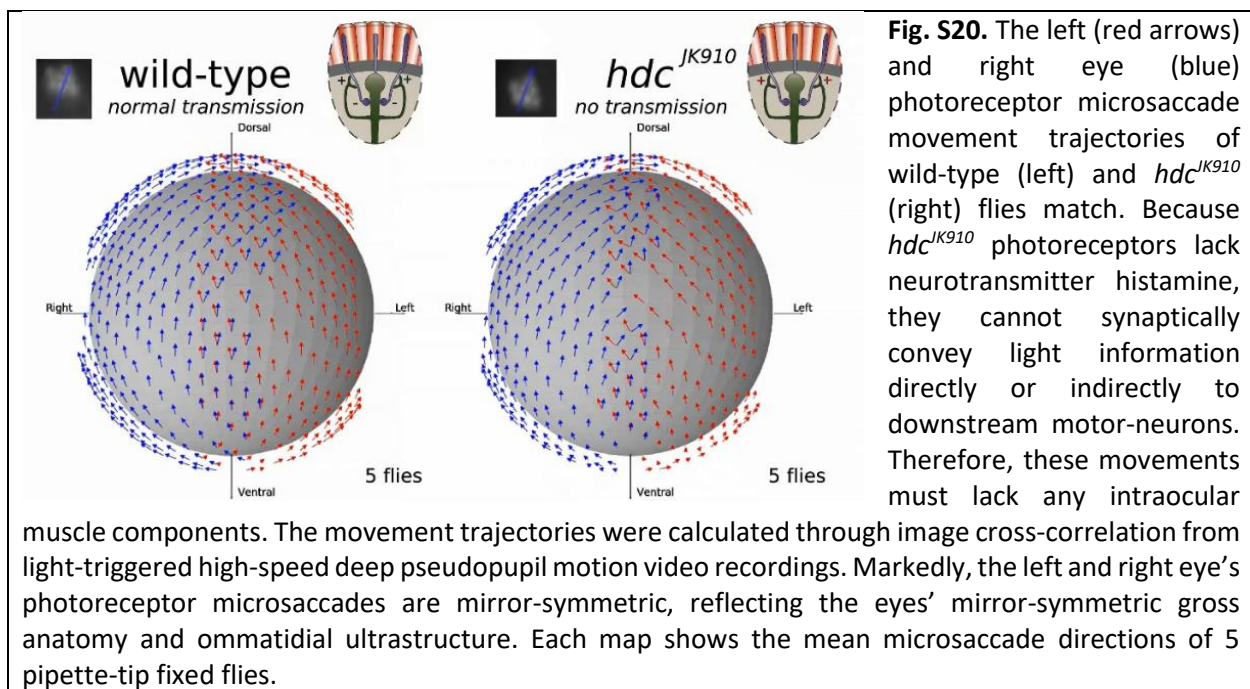

## II.6. Measuring photoreceptor microsaccade frequency response

We have previously shown that bright pulses (of the same intensity increment) evoke equally large microsaccades in both dark-adapted and brightly light-adapted photoreceptors and that the microsaccades follow bursty light intensity changes reliably (4). These results established that photoreceptor adaptation enables microsaccadic light input modulation over a broad range of environmental lighting conditions (4). Here, we further assessed how fast stimulus contrast changes - light increments (positive contrasts) and decrements (negative contrasts) - the photoreceptor microsaccades could follow in light adaptation and whether their positive and negative contrast response dynamics differ *in vivo*.

Using pipette-tip-fixed wild-type *Drosophila* (see **Section II.1.**, above), we first light-adapted those local photoreceptors, contributing to the deep-pseudopupil image, to a bright continuous UV-light background; estimated emission intensity  $>10^7$  photons/s/photoreceptor. Because an R1-R6 photoreceptor has  $\sim 30,000$  phototransduction units (microvilli), each of which samples incoming photons with refractory dynamics, this light background should result in  $\sim 5 \times 10^5$  quantum bumps/s steady-state-depolarizing the photoreceptors  $\sim 30$ - $35$  mV above their dark resting potential (4, 32). Then, using high-speed deep pseudopupil imaging (200 fps), we recorded these optically superpositioned photoreceptors' microsaccade responses to specific point-source stimuli (**Movie S5**), in which sinusoidal or pulsatile  $\pm 1$  contrast modulation frequency either accelerated in time (**fig. S21A and B**) or was constant (**fig. S21C**). Thus, the microsaccades were evoked by temporal contrast changes at their RF center, as delivered through the microscope optic. Finally, we established the microsaccades' frequency response function by measuring and analyzing these photomechanical responses for the accelerated temporal contrast modulation frequency.

The temporal contrast modulation stimuli evoked strong photoreceptor microsaccades with explicit biphasic behavior (**fig. S21**). The microsaccades' activation phase to positive contrasts (light increments) was significantly faster than their recovery phase to negative contrasts (light decrements), generating characteristic "jump-and-recoil" responses, with the quick "jumps" dominating their waveforms. These dynamics were superimposed on a gradual  $\sim 8$ -second-long photomechanical contraction creep-up until the responses became too small to be reliably cross-correlated out from the high-speed video (as limited by the imaging systems' signal-to-noise ratio). At that point, the photoreceptors' contraction creep-up also began to wane. Overall, the microsaccades followed both sinusoidal and pulsatile contrast frequencies up to 27-32 Hz, with the reliably detectable response amplitudes varying from one fly preparation to another, having an average 3 dB cut-off frequency of about 12.5 Hz (**fig. S21A and B**).

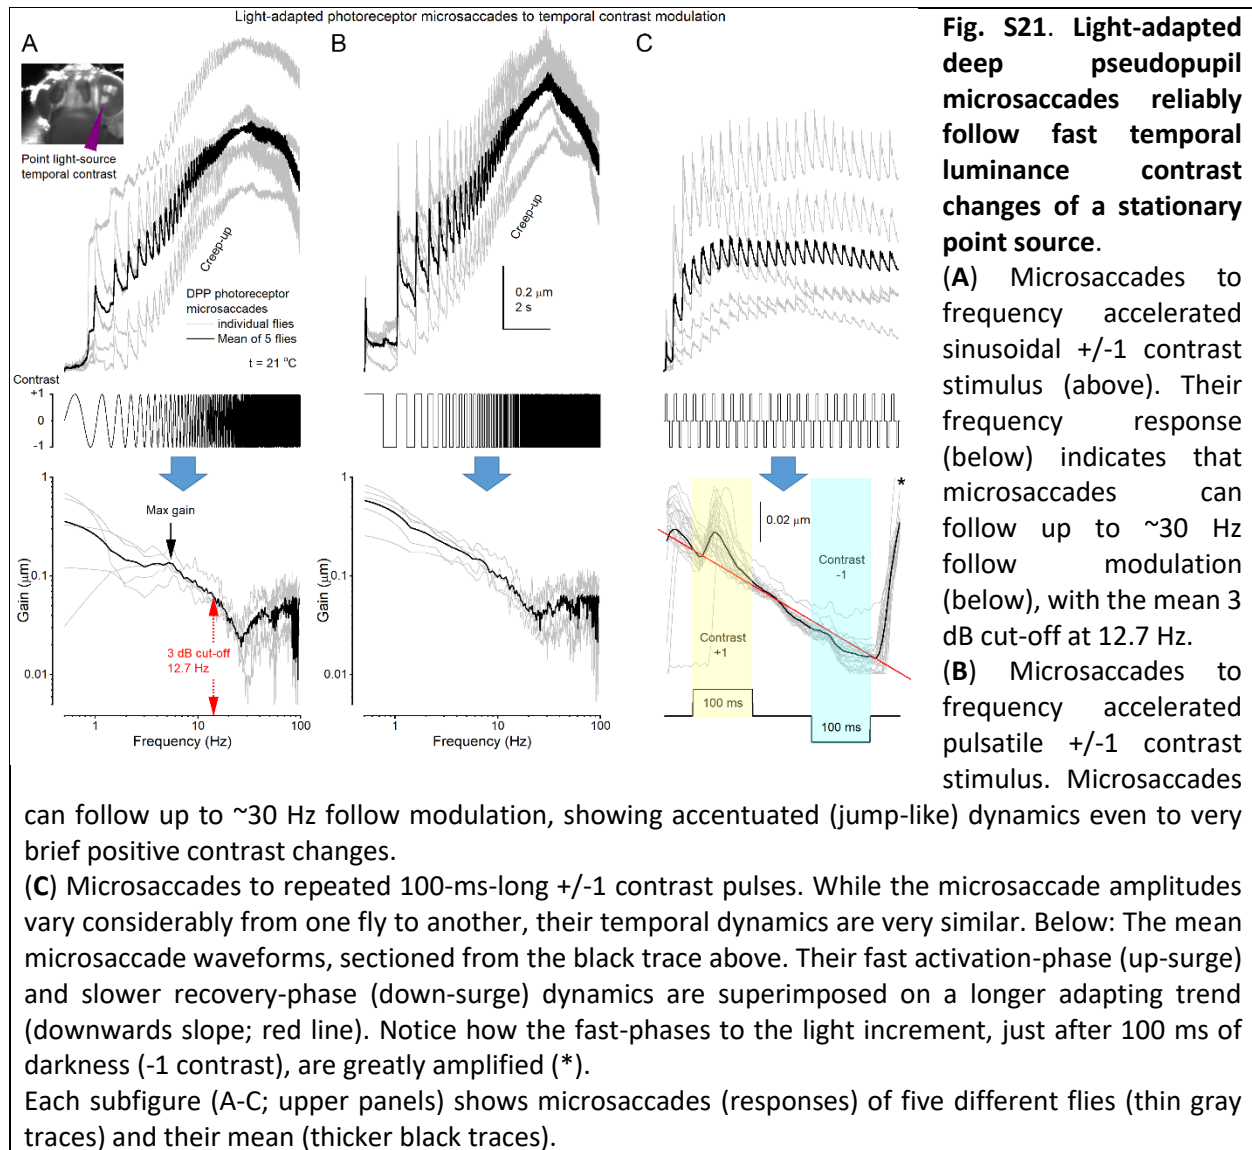

The accelerating temporal contrast frequency (**fig. S21A** and **B**) evoked progressively smaller photoreceptor microsaccades. In other words, the transient microsaccade phases to positive contrasts (light increments) were the more prominent, the longer time the photoreceptors had been exposed to negative contrasts (light decrements). These dynamics agree with the theory of refractory stochastic photon sampling by a photoreceptor's  $\sim 30,000$  microvilli (4, 31, 32, 48). Each microvillus is a photon sampling unit capable of transducing a photon's energy to a unitary response (quantum bump, QB); whilst, QBs from many microvilli integrate a photoreceptor's macroscopic voltage response (4, 31, 32, 48, 49, 64, 65). Following each QB, the light-activated microvillus becomes refractory for  $\sim 50$ – $300$  ms (4, 31, 32). Therefore, during a long positive contrast pulse, a photoreceptor's sample rate gradually saturates, as fewer microvilli are available to generate QBs and participate in thrusting the microsaccade (3, 4). Whereas, during a long negative contrast pulse, the microvilli recovered from refractoriness so that for the next positive contrast, more microvilli contracted, accentuating the microsaccade's fast phase (4); see also (3).

Correspondingly, the microsaccade responses to the sinusoidal contrasts (**fig. S21A**) were, on average, less transient than to the pulsatile contrasts (**fig. S21B**).

The light-adapted photoreceptors' microsaccades (**fig. S21C**) to repeated very brief +1 (light-yellow) and -1 (light-cyan) contrast pulses (100-ms-long) showed these differences in their respective fast- and slow-phase dynamics. Typically, these microsaccades retained  $\sim 0.1\text{-}0.3\ \mu\text{m}$  movement range at the rhabdomere level, meaning that a photoreceptor's receptive field (RF) would repeatedly jump  $\sim 0.4\text{-}1.2^\circ$  in visual space. In other words, in the natural diurnal environment, even a fleeting contrast change could shift a photoreceptor's RF in the world  $\geq 1/3$  of its acceptance angle ( $\Delta\rho_t^d$ ); see **Section IV** below. Moreover, such microsaccades happen within  $\sim 35$  ms for contrast increments, which is 2-to-4-times faster than after prolonged dark-adaptation,  $\sim 70\text{-}120$  ms (4).

Although the slow-phase (recovery) amplitudes (to -1 contrast) were smaller than the fast-phase (activation) amplitudes (to +1 contrast), both phases were distinguishable, and when corrected for the sloping adapting trend (**fig. S22A**), somewhat resembled a *Drosophila* R1-R6 photoreceptor's voltage responses to similar contrast stimuli (66). Characteristically, in both sets of recordings, their fast-phases to the light increment, immediately after 100 ms of darkness (-1 contrast), were greatly accentuated, as predicted by the refractory stochastic photon sampling theory; see also (67). Nevertheless, it was also apparent that the microsaccades traced the voltage response dynamics, giving the impression of being adaptively (mechanically band-passed) versions of the photoreceptors' voltage output (4). We further quantified this notion by comparing their frequency response functions to dynamic stimulation at comparable light adaptation and temperature (20-22 °C) (**fig. S22B**).



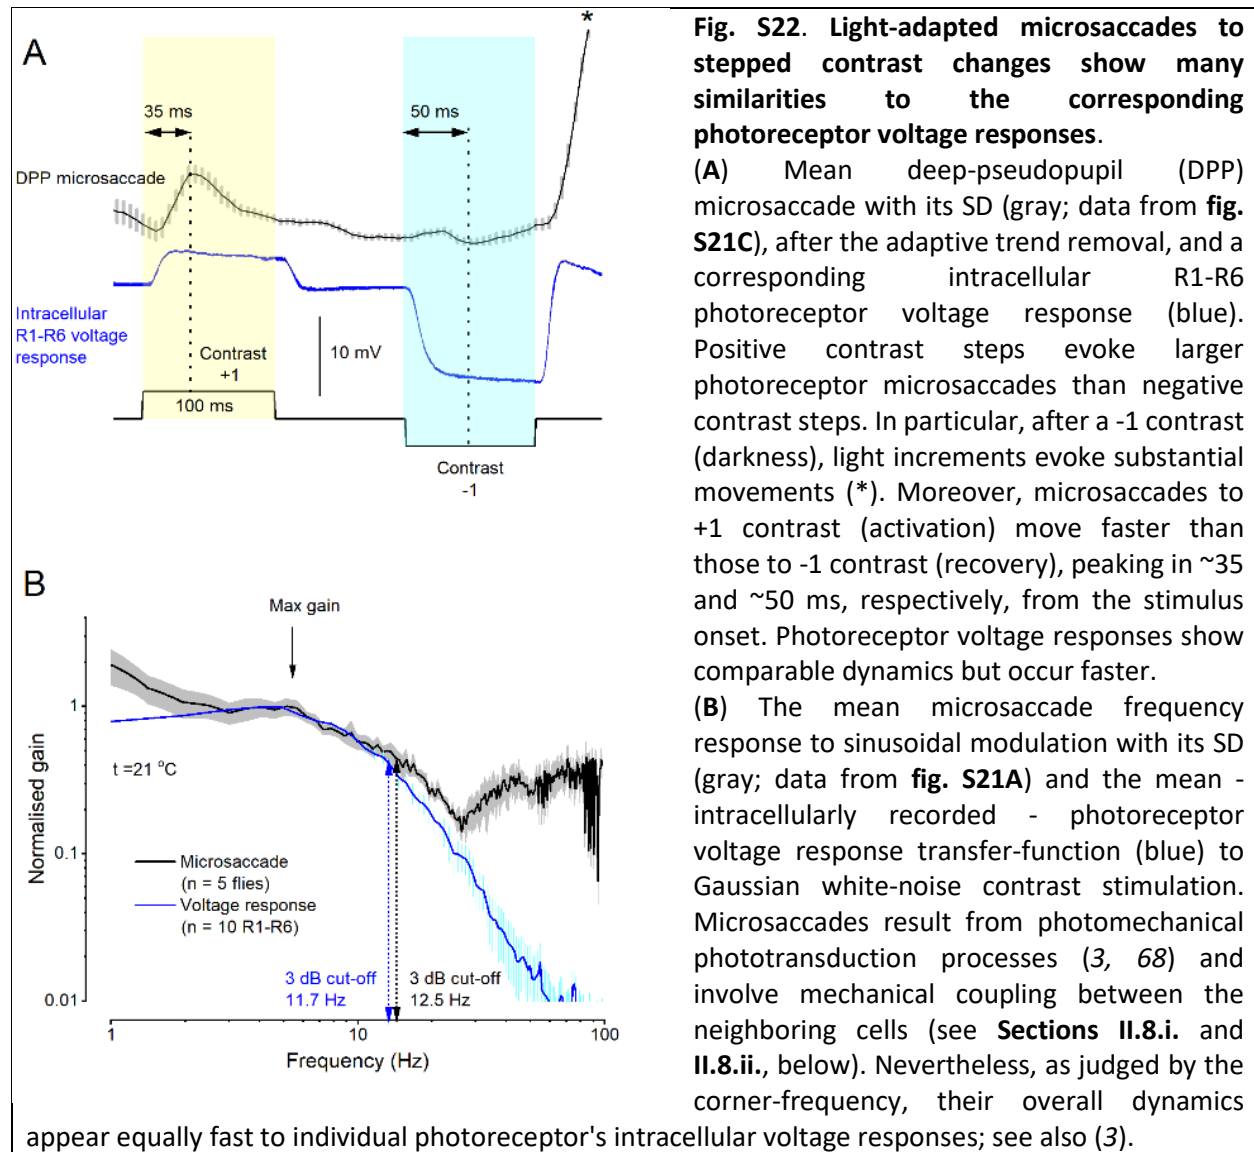

To make these comparisons (**fig. S22**), we recorded light-adapted *Drosophila* R1–R6 photoreceptors' intracellular voltage responses *in vivo* (4, 49, 61) with filamentoed sharp quartz microelectrodes (120–220 MΩ; filled with 3 M KCl) pulled on a Sutter P2000 (USA) electrode puller. The photoreceptors were light-adapted for 30 s to a bright background at the center of their receptive field before their voltage responses to the luminance contrast pulses and the pseudorandomly modulated luminance changes (~0.32 mean contrast with 1-500 Hz flat spectrum) were recorded. The data were pre-filtered at 500 Hz, sampled at 1 kHz, and analyzed offline with Biosyst software (Juusola, 1999-2020) as described formerly (31, 49, 61, 69). In brief, we calculated the transfer function  $T(f)$  between the average voltage response, or "signal"  $s(t)$ , and the contrast stimuli  $c(t)$  using their 1,024-point-long spectral estimates,  $S(f)$  and  $C(f)$ , respectively:

$$T(f) = \frac{\langle S(f) \times C^*(f) \rangle}{\langle C(f) \times C^*(f) \rangle} \quad (8)$$

Here  $\langle \rangle$  denotes the average over the different stretches and  $*$  the complex conjugate. The transfer function's gain part (blue trace) is shown in **fig. S22B**. Its 3dB corner frequency was similar to that of the microsaccade frequency response function. This finding is in keeping with the previous voltage response and photomechanical movement comparison (3) and the signal-to-noise analyses of the equivalent voltage and microsaccade responses to 20 Hz bursty light intensity changes (4).

## II.7. Simulating how pitch, yaw, and roll change optic flow to photoreceptor receptive fields (RFs)

In the natural environment, *Drosophila* perform complex flight maneuvers that involve rotations in three dimensions: *pitch*, head up or down about its wing-to-wing axis; *yaw*, turning left or right about its vertical center axis; and *roll*, rotation about its head-to-abdomen axis. All these axial rotations cause predictable changes in the optic flow the photoreceptors face.

Knowing how ommatidial lens inverts images (see **Section IV.**, below) and how local contrast changes evoke mirror-symmetric bidirectional microsaccades (see **Section II.6.**, above), we calculated the pitch-, yaw- and roll-induced optic flow changes within photoreceptors' receptive fields (RFs) across the left and right *Drosophila* eyes (**fig. S23 to S25**). To better appreciate these simulations, one needs to consider that:

- The ommatidial lens system makes the photoreceptor RFs, projected in the visual space, move in the opposite direction to their microsaccades (4) (see **Section IV.**, below; **fig. S51E**). Therefore, for bright objects, if a microsaccade's fast phase moves back-to-front and the slower phase front-to-back, the photoreceptor's RF moves first front-to-back and then returns back-to-front. This way, in a forward flight, the RF first seemingly "locks on" the optic flow of things and travels with them before returning to "lock on" the next things passing by. Moreover, when an RF moves with a moving object, the object stays longer within the RF, and its details can be better resolved in time than when the RF moves against the object motion (4). Dark objects will cause a similar effect in the retina due to cooperative local motion, only with a slight lag.
- Microsaccade directions and polarity shift gradually across the eyes, aligned by the R1-R7/8 rhabdomeres' developmental orientation map (see **Section II.1.**, above; **fig. S11.** to **S13**). For example, the fast microsaccade component shifts from front-to-back at the ventral eye (south hemisphere) to back-to-front at the anterior and dorsal eye (north hemisphere) (**fig. S15A**). Therefore, attributable to microsaccades' (i) north-south hemispheric shift in polarity (ii), left-right mirror-symmetry across the two eyes, and (iii) opposing activation and relaxation phases, the two eyes subdivide into *four optic flow processing quarters*. Equally, how the photoreceptor RFs travel over the visual space shifts in direction and polarity along these quarters but in a reverse way.
- Contrast differences of visual objects further burstify sampling, making photoreceptors ripple between the phases (see **Section II.6.**, above), with light increments driving RFs fast backward and light-decrement slower forwards; as happens in the eyes' south hemisphere.

**Pitch.** **Movie S6** shows the difference between the photoreceptors' two RF movement phases and optic flow across the right and left eye when a fly rotates a complete circle about its wing-to-wing axis, viz. performs a backward "somersault". During the "somersault", its right and left eyes will always experience a centrally expanding flow field, irrespective of whether its proboscis ("nose") points up, down, left, or right. Therefore, the right and left eye's mirror-symmetric RF motions

(**fig. S23A**) match the right- and leftward curving optic flow equally well (**fig. S23B**) at each given head rotation position (**Movie S6**; **fig. S23C** and **D**). Nonetheless, because (i) the fast and slower RF movement directions oppose each other and (ii) their polarities gradually shift along the eyes' north-south-axis, how the RF phases trace the optic flow will be juxtaposed between the eyes' north and south hemispheres (**fig. S23C** and **D**).

The simulations reveal that the backward-pitching partitions the eyes' optic-flow-tracing with a north-to-south traveling wavefront. North of the wavefront, the slower RF movement phase matches and the fast phase opposes the optic flow, while south of it, the RF phases reverse (**Movie S6**). However, when the fly flips upside-down, so do the RF phases, as its eyes now face optic flow from behind. Right through the "somersault", these dynamics make the eyes' corresponding north and south differences (**fig. S23C** and **D**) oscillate with the RF movements' 180° phase shift (**fig. S23E**).

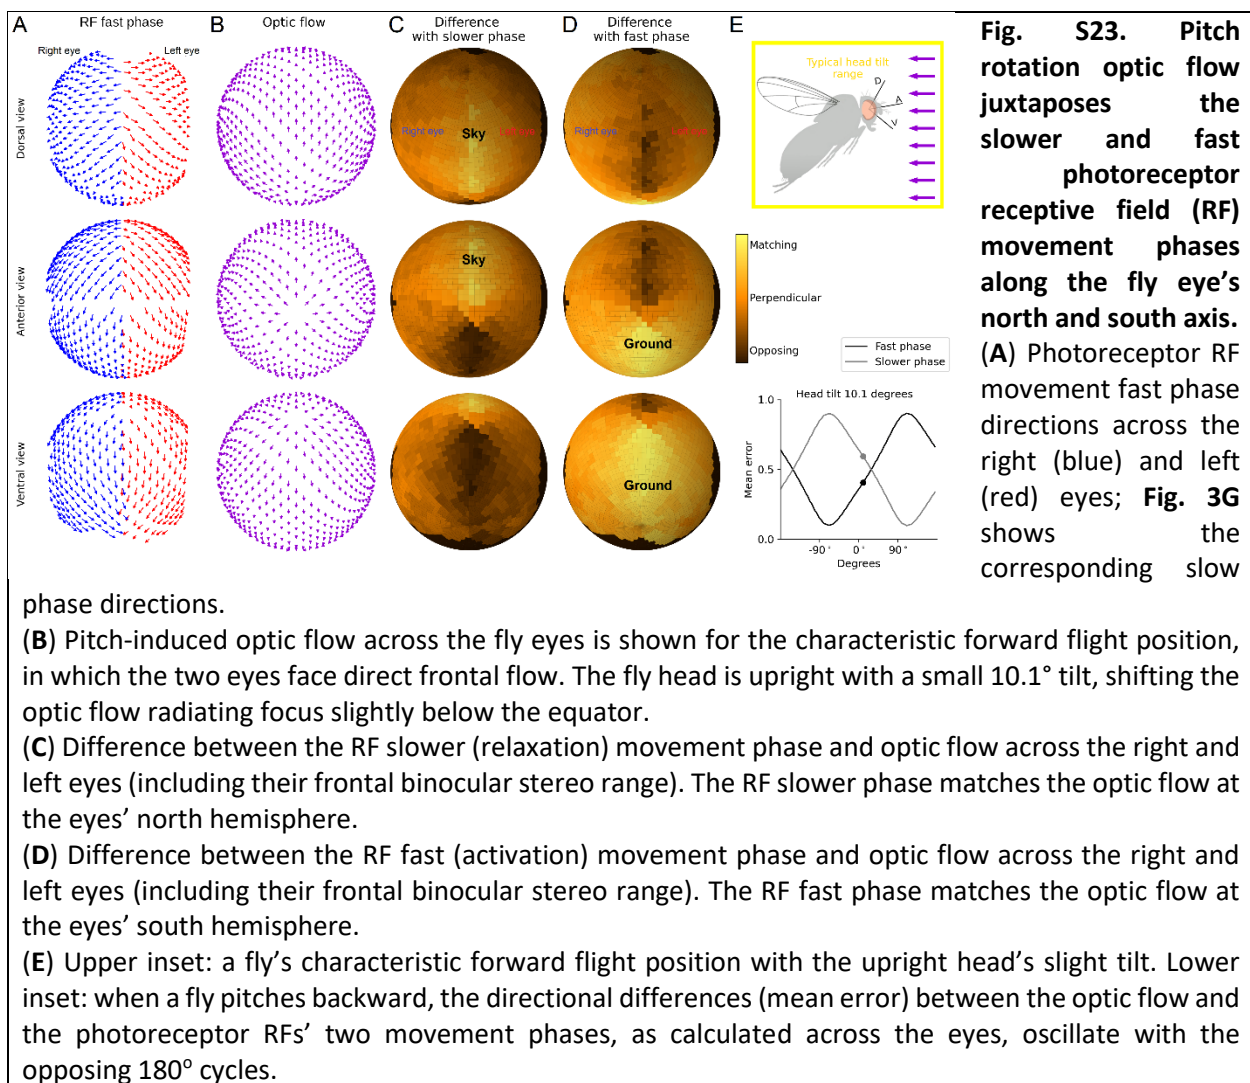

In a fly's normal forward flight posture (**fig. S23**) - with its upright head having a slight 10.1° tilt (*cf.* **fig. S12**)- the RFs' fast- and slower-phases are set in a balanced mid-state, where the fast-phase

broadly matches the “ground-flow” and the slower-phase the “sky-flow”. This visual field partitioning into a “slower-phase-matched north hemisphere” and a “fast-phase-matched south hemisphere” may help a fly to see better nearby fast-moving frontal and ventral world objects, such as other *Drosophila* and passing-by food items, and slow-moving more extensive features, such as landscape and clouds, further in the skyline.

**Yaw.** **Movie S7** shows how a fly’s right or left turns - when holding its normal flight posture with the upright head (**fig. S24**) - accentuate phasic differences in binocular contrasts. Again, the simulations disclose how the optic flow processing differs between the eye quarters (**fig. S24A and B**), but this time the right and left eye are juxtaposed against each other, rather than the eyes’ north and south halves; as happens in *pitch*. Explicitly, during a right or left turn, one eye’s RF fast and slower phases move with and against the optic flow (4), respectively, while simultaneously the other eye’s phases do the reverse (**fig. S24C and D**). Furthermore, since the mean errors between the opposing fast and slower RF movement phases and optic flow are for both eyes (**fig. S24E**), these values approach 50% while oscillating with the RF movements’ 180° phase shift (*i.e.*, in opposing polarity).

Photoreceptors encode these opposing phases of moving objects in their voltage responses (4), and we later show how their binocular differences – as dynamic disparity signals - could be used by the fly brain to encode visual object depth (see **Section IV**, below).

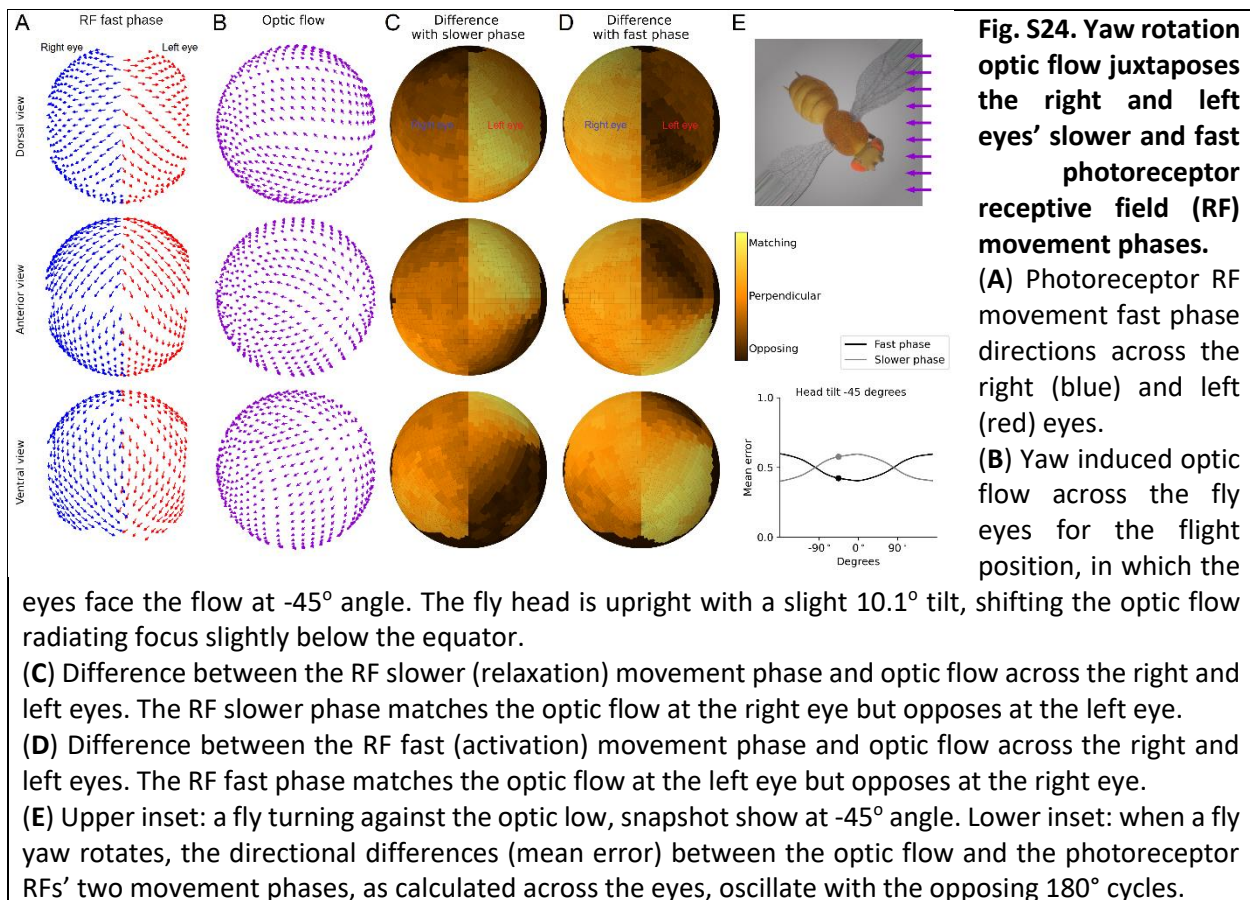

**Roll. fig. S25** shows the difference between the two RF phases and optic flow across the right and left eye when a fly rotates about its head-to-abdomen axis. Because throughout this roll rotation, a fly always faces frontal optic flow, the RF movements' fast- and slower-phases remain in a state of static opponency. Consequently, their local differences to optic flow across the eyes (**fig. S25C and D**) remain similar to that seen in the characteristic forward flight (**fig. S23C and D**), with the north-hemisphere RF movements' slower-phase and the south-hemisphere RF movements' fast-phase matching the optic flow.

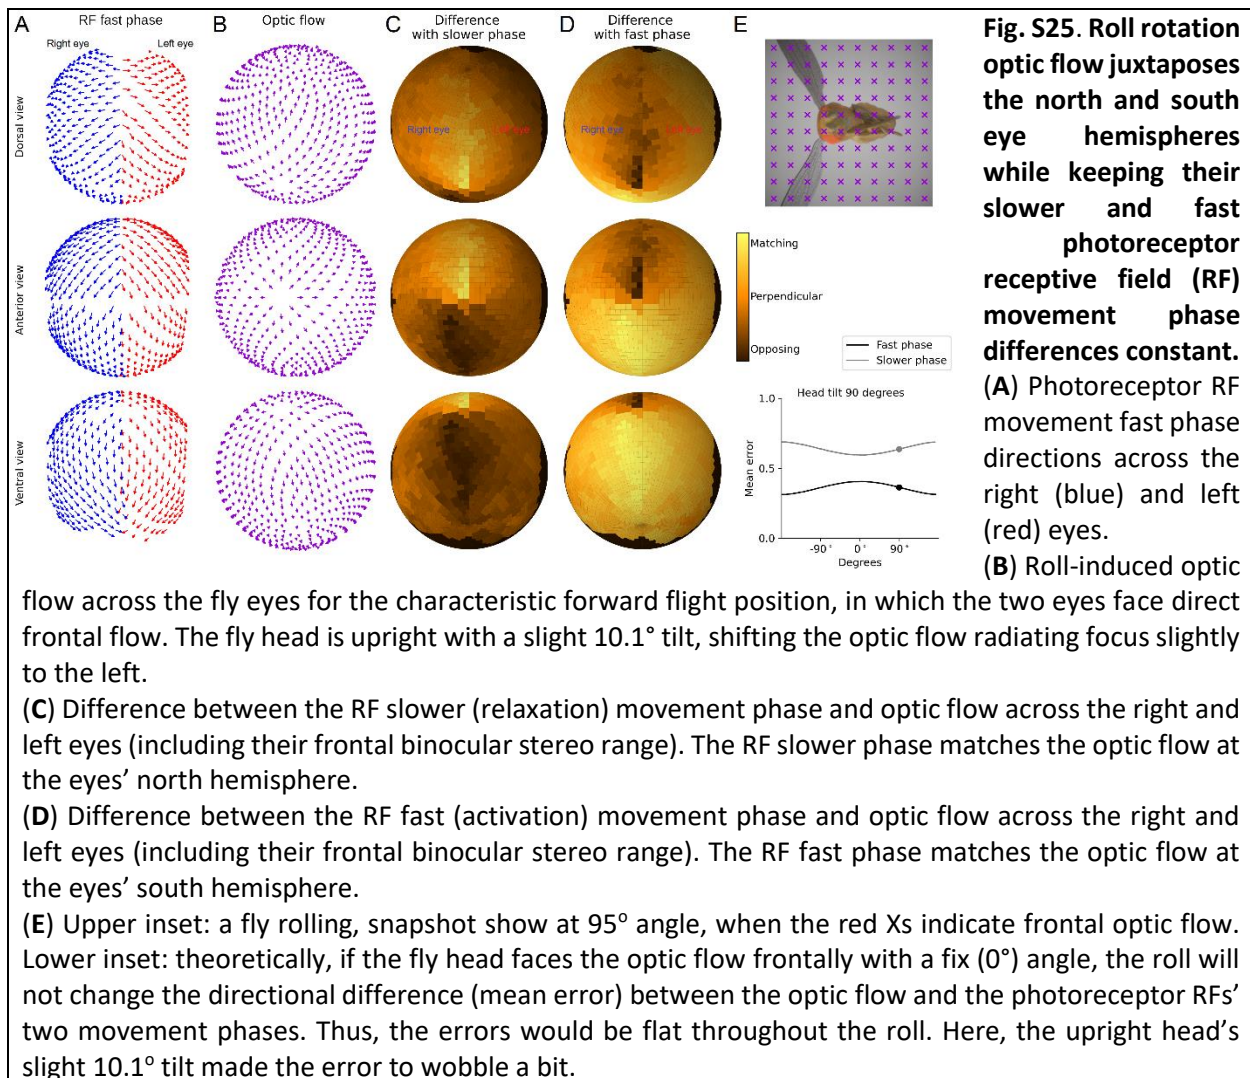

## II.8. Testing mechanical coupling of intra-ommatidial photoreceptors

We examined whether activation of a single R1-R8 causes it to contract alone or whether this induces ommatidial R1-R8s to move as a unit. Because of the underlying R1-R6 superposition and the left/right eye structural and microsaccadic mirror-symmetries, both outcomes should sharpen phase-differences in moving light input and its binocular R1-R6 outputs to capture stereo- and optic-flow-information better. However, different trade-offs (speed/accuracy) and costs (energy/robustness) might have resulted in selecting one or the other. The results from two separate

assays established that *single photoreceptor activation moves all photoreceptors in the same ommatidium*:

- i. Using the goniometric system and electrophysiology, we measured deep pseudopupil microsaccades and ERG responses to UV- and green-light of otherwise blind flies, in which only one photoreceptor type (R7s, R8s, or R1-R6) or all R7/8s were rescued (transgenic Rhodopsin-specific *norpA* rescue flies) (**fig. S26**). We also did such recordings in UV-flies, in which R1-R6 the green-sensitive Rh1 was replaced with the UV-sensitive Rh3, and in *ninaE*<sup>8</sup> mutants (15), in which inner photoreceptors (R7/8) functioned normally but outer photoreceptors (R1-R6) were blind (**fig. S27**). The expectation was that if photoreceptors move independently, then instead of all 7 R-images moving together, only R7/8, or only R1-R6, would move in flies with R-specific rhodopsin rescue. Instead, we found that all R1-R8 rhabdomeres in optical superposition are dependent and move together as a unit (**fig. S26 and S27**), with the measured microsaccade and ERG responses matching the rescued photoreceptors' spectral sensitivities (**fig. S28**).
- ii. Using the cornea neutralization method (**fig. S29**) with a targeted single R1-R8 stimulation, we directly measured how R1-R8 rhabdomeres move as a unit inside an ommatidium. We found that a single photoreceptor or ommatidium light stimulation (light-spot stimulation; **fig. S31**) would evoke a collective R1-R7/8 microsaccade inside the ommatidium while the other rhabdomeres outside this ommatidium remained still. Whereas for larger light stimulation areas (light-field stimulation; **fig. S30**), the ommatidial rhabdomeres in the stimulus center, experiencing the highest photon rates, moved the most. Whilst the ommatidial rhabdomeres at the stimulus edge, with the lowest photon rates, moved the least.

### **II.8.i. Pseudopupil microsaccades and ERG responses to single photoreceptor class activation**

The *norpA* Rh-rescue flies recordings showed that light-activating just a single spectral-class of photoreceptors in the optically superpositioned R1-R7/8 rhabdomeres, forming the observed deep pseudopupil image (17), is enough to generate a sideways-moving microsaccade (**fig. S26**). These data provided strong evidence that R1-R7/8 photoreceptors in each ommatidium do not move sideways independently but are mechanically coupled.

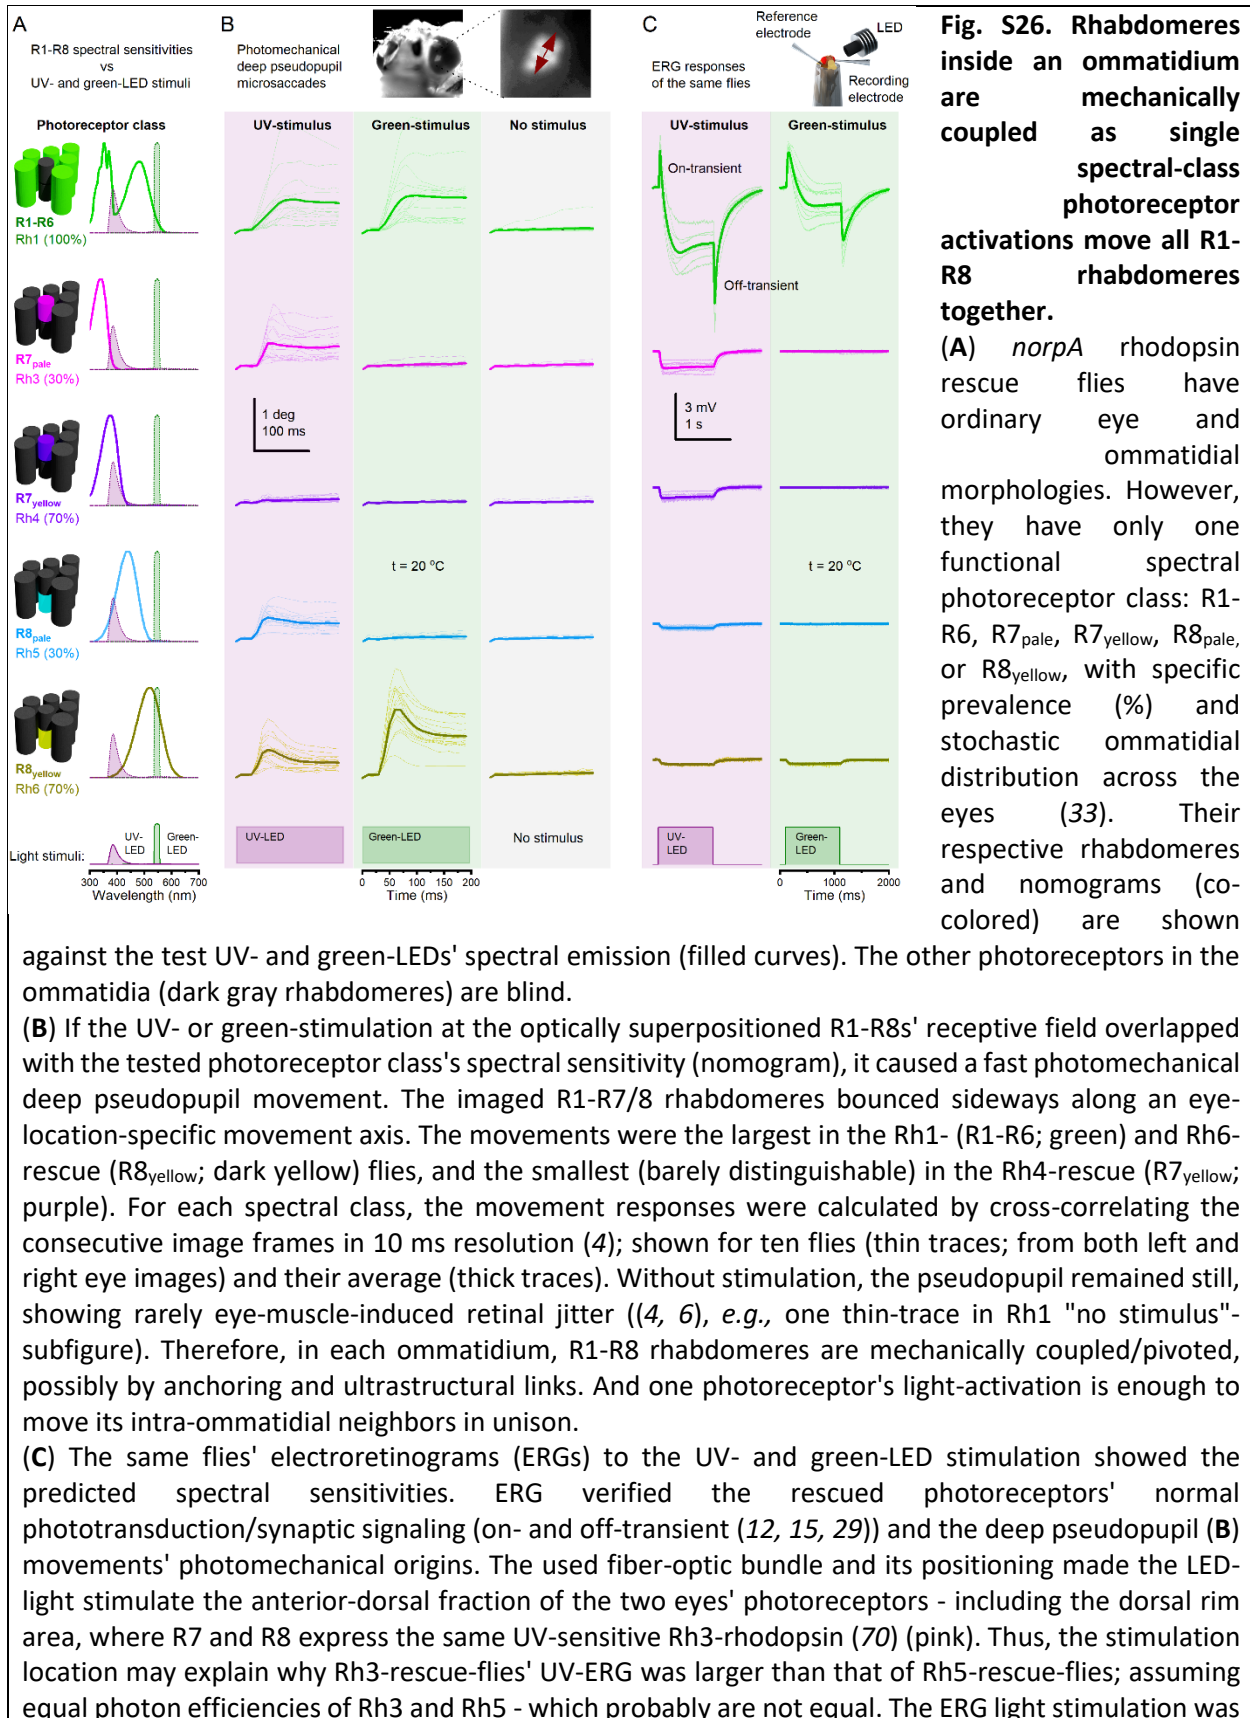

~10-fold weaker than the stimuli in pseudopupil experiments, measured by a spectrometer (**B**). All data from pipette-tip-fixed flies.

Using bright spectrally-distanced green- and UV-light stimuli (385 nm UV-LED and 547 nm green-LED peak-wavelengths; **fig. S26A**), we further evaluated R1-R6, R7<sub>yellow</sub>, R7<sub>pale</sub>, R8<sub>yellow</sub>, and R8<sub>pale</sub> photoreceptors' relative contributions in powering a microsaccade. For the tested stimuli, R1-R6 and R8<sub>yellow</sub> activations caused the largest microsaccades and R7<sub>yellow</sub> activation the smallest. However, because of the mechanical coupling, R1-R8s collective photomechanical sensitivity covers a broad color-spectrum. With each rhodopsin having a broad spectral range that overlaps with the other rhodopsins, most monochromatic colors will simultaneously activate multiple photoreceptor spectral-classes, in which photomechanics add up the total microsaccade dynamics. Therefore, for example, an R7<sub>yellow</sub> photoreceptor will always move along ommatidial R1-R8 microsaccades, irrespective of whether it was directly light-activated or not.

These results substantiated that intraocular-muscle-activity rarely interferes with *an immobilized Drosophila's* photomechanical photoreceptor microsaccade dynamics (*cf. Sections II.4 and II.5.*, above). Had the microsaccades been or included fast light-triggered muscle-reflexes, their amplitudes to both the UV- and green-stimuli would have been similar, showing spectrally-independent dynamics. Whereas, had the microsaccades been spontaneous or driven by clock-spikes (47), they would have occurred regularly throughout the recordings. Instead, the results showed that individual flies' microsaccade sensitivity followed their rescued photoreceptors' spectral sensitivities (*e.g.*, R8<sub>yellow</sub> in **fig. S26A and B**) and that the microsaccades never occurred in the “no-stimulus”-control recordings (**fig. S26B**).

Summing up the rhodopsin rescue *norpA*-mutants (Rh1+Rh3+Rh4+Rh5+Rh6) R1-R6 microsaccades' *average* lateral movements to the UV-flash gave a total movement of 0.728  $\mu\text{m}$ ; as the expected ommatidial rhabdomere displacement if the rhabdomere movements added up linearly. However, this predicted movement range is, in fact, less than half of the wild-type flies' *average* R1-R6 microsaccade movement of 1.538  $\mu\text{m}$  (**fig. S26 to S28**). In comparison, summing up the rhodopsin rescue *norpA*-mutants (Rh1+Rh3+Rh4+Rh5+Rh6) R1-R6 microsaccades' *maximum* lateral movements (of the best/healthiest preparations) gave a total movement range of 1.966  $\mu\text{m}$ . This value fell comfortably within the wild-type microsaccade movements, ranging from 1.052 to 2.166  $\mu\text{m}$ . Conversely, the rhodopsin rescue *norpA*-mutants' (Rh1+Rh3+Rh4+Rh5+Rh6) integrated *average* ERG photoreceptor component to the same UV-flash (6.318 mV) is similar to the wild-type flies' *average* ERG photoreceptor component (5.034 mV), indicating the different photoreceptor types individual ERGs sum up the total ERG photoreceptor component. Hence, the discrepancy between the *average* lateral microsaccade amplitudes and *average* ERG responses suggests that the rhodopsin-rescued *norpA*-mutants' lateral microsaccade component is not always fully rescued and may display sub-optimal structural integrity. This finding is consistent with our observations about the fragility of some mutant-flies' microsaccades to preparation-induced mechanical stress (**Section II.4.**) and expression variability (**Section VI.6.: fig.S72**)

*Other predictable observations* further indicate R1-R7/8 photoreceptors' photomechanical contractions mechanic coupling to generate their collective microsaccades:



- UV-flies - constructed on *ninaE*<sup>8</sup> mutants (**fig. S27A**) by rescuing R1-R6 function with UV-sensitive Rh3-rhodopsin expression - have also functional R7/8 photoreceptors (**fig. S27B**). These R7/8 photoreceptors are sufficient to evoke the UV-flies' ommatidial R1-R7/8 microsaccades to the green flash, comparable to *ninaE*<sup>8</sup> microsaccades (**fig. S27B**).
- Rh3-6-*norpA* rescue flies with functioning R7/8 photoreceptors showed similar microsaccade and ERG dynamics to *ninaE*<sup>8</sup>-mutants.

Other predictable observations indicate synaptic feedback modulating R1-R7/8 microsaccades:

- *dSK* mutants' microsaccades (**fig. S27B**) were faster and smaller than those of the wild-type flies, consistent with their accelerated photoreceptor voltage responses (62, 63). *dSK* mutant R1-R6 photoreceptors have been shown to experience a tonic synaptic feedback overload from the lamina visual interneurons, which continuously depolarize them, making their voltage responses smaller and faster.

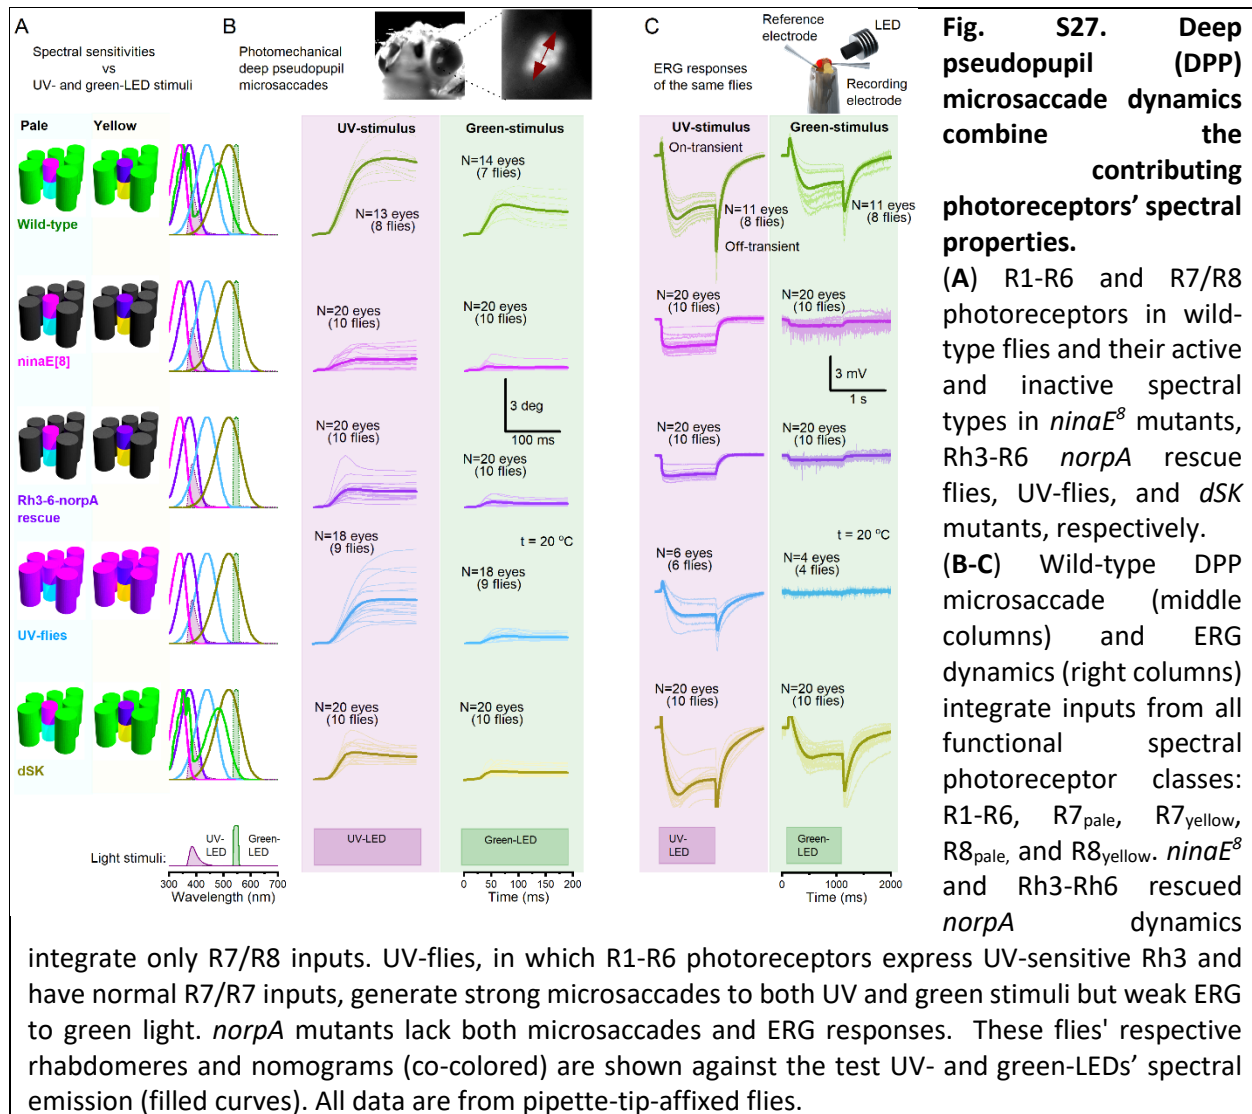

We implemented these coupling dynamics in the detailed optical and biophysical modeling of how photoreceptors sample and integrate spatiotemporal information to achieve dynamic super-resolution stereopsis (see **Section IV.**, below).

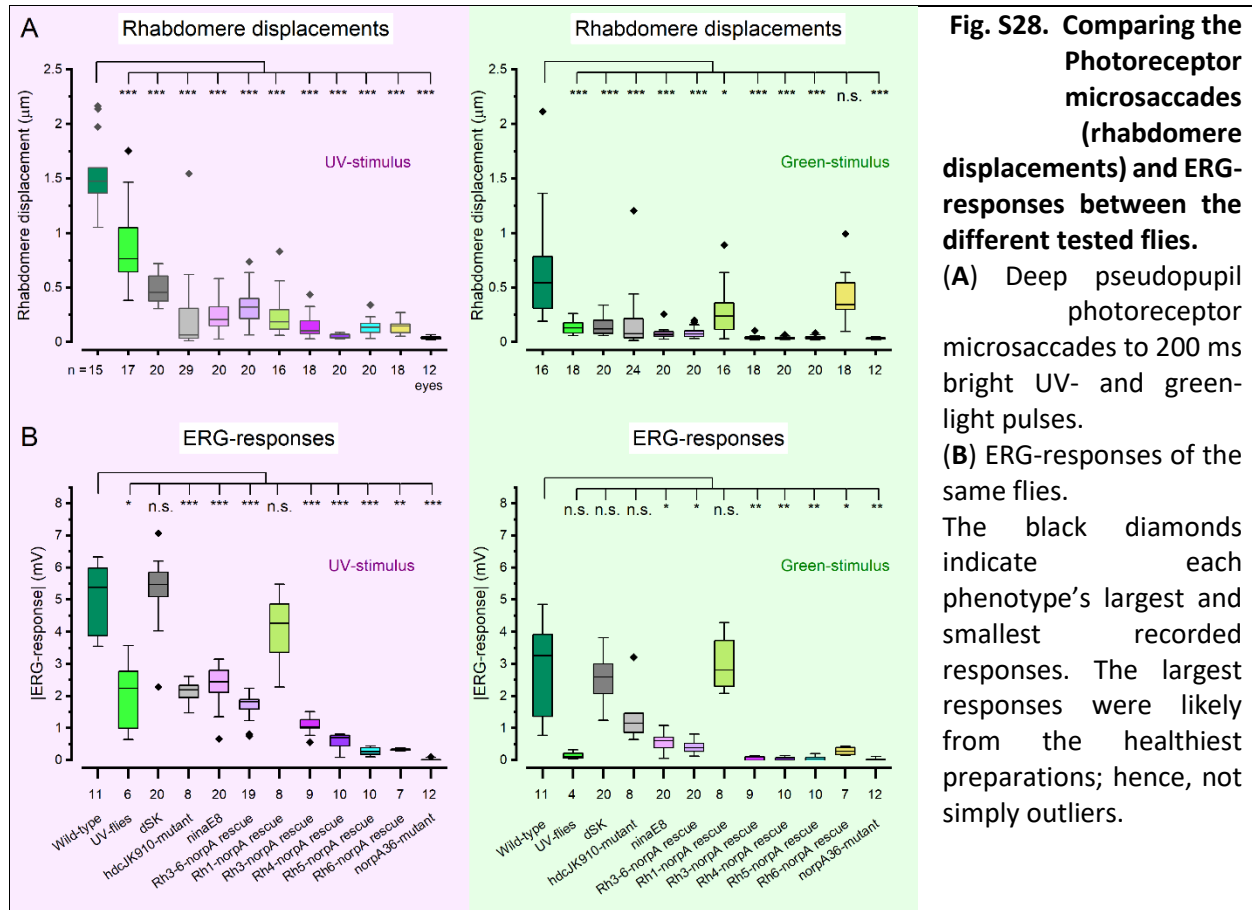

A suite of statistical tests was performed to compare the deep pseudopupil observed photoreceptor microsaccades and the ERG-responses between all tested fly groups. First, D'Agostino-Pearson's normality test (71) was used to check if a group deviated from a Gaussian distribution with  $\alpha = 0.05$  significance level. If both groups were normally distributed, we used Welch's adaptation of the two-sided t-test (71) to have higher reliability under unequal variances and sample sizes. If either both groups or one significantly deviated from a normal distribution, the Mann-Whitney U-test (71) was used instead. Finally, each statistics table was independently p-value adjusted using the Holm-Šidák step-down method (72) to control the family-wise error rate (Type 1 error) under multiple comparisons.

**Table S2. DPP microsaccades to 200ms UV flash**

| Group A   | Group B  | N_A | N_B | Mean difference A-B ( $\mu\text{m}$ ) | Test   | p-value (Holm-Sidak)   |     |
|-----------|----------|-----|-----|---------------------------------------|--------|------------------------|-----|
| wild-type | UV-flies | 15  | 17  | $6.673 \times 10^{-1}$                | t-test | $3.584 \times 10^{-4}$ | *** |

|            |                                   |    |    |                        |              |                         |     |
|------------|-----------------------------------|----|----|------------------------|--------------|-------------------------|-----|
| wild-type  | <i>dSK</i>                        | 15 | 20 | 1.044                  | t-test       | $4.166 \times 10^{-8}$  | *** |
| wild-type  | <i>hdc<sup>JK910</sup></i>        | 15 | 29 | 1.320                  | Mann–Whitney | $8.980 \times 10^{-6}$  | *** |
| wild-type  | <i>ninaE<sup>8</sup></i>          | 15 | 20 | 1.294                  | t-test       | $6.692 \times 10^{-10}$ | *** |
| wild-type  | Rh3-6- <i>norpA</i> rescue        | 15 | 20 | 1.210                  | t-test       | $1.661 \times 10^{-9}$  | *** |
| wild-type  | Rh1- <i>norpA</i> rescue          | 15 | 16 | 1.289                  | Mann–Whitney | $5.096 \times 10^{-5}$  | *** |
| wild-type  | Rh3- <i>norpA</i> rescue          | 15 | 18 | 1.388                  | t-test       | $6.814 \times 10^{-10}$ | *** |
| wild-type  | Rh4- <i>norpA</i> rescue          | 15 | 20 | 1.487                  | t-test       | $2.414 \times 10^{-9}$  | *** |
| wild-type  | Rh5- <i>norpA</i> rescue          | 15 | 20 | 1.399                  | Mann–Whitney | $1.531 \times 10^{-5}$  | *** |
| wild-type  | Rh6- <i>norpA</i> rescue          | 15 | 18 | 1.401                  | t-test       | $2.946 \times 10^{-9}$  | *** |
| wild-type  | <i>norpA<sup>36</sup></i> -mutant | 15 | 12 | 1.499                  | t-test       | $2.234 \times 10^{-9}$  | *** |
| UV-flies   | <i>dSK</i>                        | 17 | 20 | $3.767 \times 10^{-1}$ | t-test       | $3.015 \times 10^{-2}$  | *   |
| UV-flies   | <i>hdc<sup>JK910</sup></i>        | 17 | 29 | $6.524 \times 10^{-1}$ | Mann–Whitney | $1.852 \times 10^{-5}$  | *** |
| UV-flies   | <i>ninaE<sup>8</sup></i>          | 17 | 20 | $6.270 \times 10^{-1}$ | t-test       | $1.990 \times 10^{-4}$  | *** |
| UV-flies   | Rh3-6- <i>norpA</i> rescue        | 17 | 20 | $5.423 \times 10^{-1}$ | t-test       | $9.350 \times 10^{-4}$  | *** |
| UV-flies   | Rh1- <i>norpA</i> rescue          | 17 | 16 | $6.213 \times 10^{-1}$ | Mann–Whitney | $2.350 \times 10^{-4}$  | *** |
| UV-flies   | Rh3- <i>norpA</i> rescue          | 17 | 18 | $7.203 \times 10^{-1}$ | t-test       | $3.819 \times 10^{-5}$  | *** |
| UV-flies   | Rh4- <i>norpA</i> rescue          | 17 | 20 | $8.193 \times 10^{-1}$ | t-test       | $1.134 \times 10^{-5}$  | *** |
| UV-flies   | Rh5- <i>norpA</i> rescue          | 17 | 20 | $7.319 \times 10^{-1}$ | Mann–Whitney | $6.468 \times 10^{-6}$  | *** |
| UV-flies   | Rh6- <i>norpA</i> rescue          | 17 | 18 | $7.334 \times 10^{-1}$ | t-test       | $3.875 \times 10^{-5}$  | *** |
| UV-flies   | <i>norpA<sup>36</sup></i> -mutant | 17 | 12 | $8.314 \times 10^{-1}$ | t-test       | $9.732 \times 10^{-6}$  | *** |
| <i>dSK</i> | <i>hdc<sup>JK910</sup></i>        | 20 | 29 | $2.757 \times 10^{-1}$ | Mann–Whitney | $3.106 \times 10^{-4}$  | *** |
| <i>dSK</i> | <i>ninaE<sup>8</sup></i>          | 20 | 20 | $2.503 \times 10^{-1}$ | t-test       | $1.395 \times 10^{-4}$  | *** |
| <i>dSK</i> | Rh3-6- <i>norpA</i> rescue        | 20 | 20 | $1.656 \times 10^{-1}$ | t-test       | $2.820 \times 10^{-2}$  | *   |

|                             |                                    |    |    |                         |              |                         |     |
|-----------------------------|------------------------------------|----|----|-------------------------|--------------|-------------------------|-----|
| <i>dSK</i>                  | Rh1- <i>norpA</i> rescue           | 20 | 16 | $2.446 \times 10^{-1}$  | Mann-Whitney | $1.917 \times 10^{-3}$  | **  |
| <i>dSK</i>                  | Rh3- <i>norpA</i> rescue           | 20 | 18 | $3.436 \times 10^{-1}$  | t-test       | $2.037 \times 10^{-8}$  | *** |
| <i>dSK</i>                  | Rh4- <i>norpA</i> rescue           | 20 | 20 | $4.426 \times 10^{-1}$  | t-test       | $2.157 \times 10^{-10}$ | *** |
| <i>dSK</i>                  | Rh5- <i>norpA</i> rescue           | 20 | 20 | $3.552 \times 10^{-1}$  | Mann-Whitney | $2.928 \times 10^{-6}$  | *** |
| <i>dSK</i>                  | Rh6- <i>norpA</i> rescue           | 20 | 18 | $3.567 \times 10^{-1}$  | t-test       | $1.366 \times 10^{-9}$  | *** |
| <i>dSK</i>                  | <i>norpA</i> <sup>36</sup> -mutant | 20 | 12 | $4.547 \times 10^{-1}$  | t-test       | $1.490 \times 10^{-10}$ | *** |
| <i>hdc</i> <sup>JK910</sup> | <i>ninaE</i> <sup>8</sup>          | 29 | 20 | $-2.539 \times 10^{-2}$ | Mann-Whitney | $4.148 \times 10^{-11}$ | ns  |
| <i>hdc</i> <sup>JK910</sup> | Rh3-6- <i>norpA</i> rescue         | 29 | 20 | $-1.101 \times 10^{-1}$ | Mann-Whitney | $3.792 \times 10^{-2}$  | *   |
| <i>hdc</i> <sup>JK910</sup> | Rh1- <i>norpA</i> rescue           | 29 | 16 | $-3.108 \times 10^{-2}$ | Mann-Whitney | $4.148 \times 10^{-11}$ | ns  |
| <i>hdc</i> <sup>JK910</sup> | Rh3- <i>norpA</i> rescue           | 29 | 18 | $6.785 \times 10^{-2}$  | Mann-Whitney | $7.898 \times 10^{-11}$ | ns  |
| <i>hdc</i> <sup>JK910</sup> | Rh4- <i>norpA</i> rescue           | 29 | 20 | $1.669 \times 10^{-1}$  | Mann-Whitney | $4.817 \times 10^{-11}$ | ns  |
| <i>hdc</i> <sup>JK910</sup> | Rh5- <i>norpA</i> rescue           | 29 | 20 | $7.948 \times 10^{-2}$  | Mann-Whitney | $7.898 \times 10^{-11}$ | ns  |
| <i>hdc</i> <sup>JK910</sup> | Rh6- <i>norpA</i> rescue           | 29 | 18 | $8.098 \times 10^{-2}$  | Mann-Whitney | $7.898 \times 10^{-11}$ | ns  |
| <i>hdc</i> <sup>JK910</sup> | <i>norpA</i> <sup>36</sup> -mutant | 29 | 12 | $1.790 \times 10^{-1}$  | Mann-Whitney | $2.126 \times 10^{-11}$ | ns  |
| <i>ninaE</i> <sup>8</sup>   | Rh3-6- <i>norpA</i> rescue         | 20 | 20 | $-8.473 \times 10^{-2}$ | t-test       | $5.800 \times 10^{-11}$ | ns  |
| <i>ninaE</i> <sup>8</sup>   | Rh1- <i>norpA</i> rescue           | 20 | 16 | $-5.689 \times 10^{-3}$ | Mann-Whitney | $8.295 \times 10^{-11}$ | ns  |
| <i>ninaE</i> <sup>8</sup>   | Rh3- <i>norpA</i> rescue           | 20 | 18 | $9.324 \times 10^{-2}$  | t-test       | $4.148 \times 10^{-11}$ | ns  |
| <i>ninaE</i> <sup>8</sup>   | Rh4- <i>norpA</i> rescue           | 20 | 20 | $1.923 \times 10^{-1}$  | t-test       | $7.883 \times 10^{-4}$  | *** |
| <i>ninaE</i> <sup>8</sup>   | Rh5- <i>norpA</i> rescue           | 20 | 20 | $1.049 \times 10^{-1}$  | Mann-Whitney | $1.251 \times 10^{-11}$ | ns  |
| <i>ninaE</i> <sup>8</sup>   | Rh6- <i>norpA</i> rescue           | 20 | 18 | $1.064 \times 10^{-1}$  | t-test       | $1.613 \times 10^{-11}$ | ns  |
| <i>ninaE</i> <sup>8</sup>   | <i>norpA</i> <sup>36</sup> -mutant | 20 | 12 | $2.044 \times 10^{-1}$  | t-test       | $3.958 \times 10^{-4}$  | *** |
| Rh3-6- <i>norpA</i> rescue  | Rh1- <i>norpA</i> rescue           | 20 | 16 | $7.904 \times 10^{-2}$  | Mann-Whitney | $3.579 \times 10^{-11}$ | ns  |
| Rh3-6- <i>norpA</i> rescue  | Rh3- <i>norpA</i> rescue           | 20 | 18 | $1.780 \times 10^{-1}$  | t-test       | $1.128 \times 10^{-2}$  | *   |

|                            |                                    |    |    |                         |              |                        |     |
|----------------------------|------------------------------------|----|----|-------------------------|--------------|------------------------|-----|
| Rh3-6- <i>norpA</i> rescue | Rh4- <i>norpA</i> rescue           | 20 | 20 | $2.771 \times 10^{-1}$  | t-test       | $1.701 \times 10^{-5}$ | *** |
| Rh3-6- <i>norpA</i> rescue | Rh5- <i>norpA</i> rescue           | 20 | 20 | $1.896 \times 10^{-1}$  | Mann-Whitney | $3.163 \times 10^{-4}$ | *** |
| Rh3-6- <i>norpA</i> rescue | Rh6- <i>norpA</i> rescue           | 20 | 18 | $1.911 \times 10^{-1}$  | t-test       | $1.547 \times 10^{-3}$ | **  |
| Rh3-6- <i>norpA</i> rescue | <i>norpA</i> <sup>36</sup> -mutant | 20 | 12 | $2.892 \times 10^{-1}$  | t-test       | $9.735 \times 10^{-6}$ | *** |
| Rh1- <i>norpA</i> rescue   | Rh3- <i>norpA</i> rescue           | 16 | 18 | $9.893 \times 10^{-2}$  | Mann-Whitney | $4.817 \times 10^{-1}$ | ns  |
| Rh1- <i>norpA</i> rescue   | Rh4- <i>norpA</i> rescue           | 16 | 20 | $1.980 \times 10^{-1}$  | Mann-Whitney | $1.395 \times 10^{-4}$ | *** |
| Rh1- <i>norpA</i> rescue   | Rh5- <i>norpA</i> rescue           | 16 | 20 | $1.106 \times 10^{-1}$  | Mann-Whitney | $3.511 \times 10^{-1}$ | ns  |
| Rh1- <i>norpA</i> rescue   | Rh6- <i>norpA</i> rescue           | 16 | 18 | $1.121 \times 10^{-1}$  | Mann-Whitney | $3.511 \times 10^{-1}$ | ns  |
| Rh1- <i>norpA</i> rescue   | <i>norpA</i> <sup>36</sup> -mutant | 16 | 12 | $2.101 \times 10^{-1}$  | Mann-Whitney | $2.699 \times 10^{-4}$ | *** |
| Rh3- <i>norpA</i> rescue   | Rh4- <i>norpA</i> rescue           | 18 | 20 | $9.909 \times 10^{-2}$  | t-test       | $4.436 \times 10^{-2}$ | *   |
| Rh3- <i>norpA</i> rescue   | Rh5- <i>norpA</i> rescue           | 18 | 20 | $1.162 \times 10^{-2}$  | Mann-Whitney | $8.295 \times 10^{-1}$ | ns  |
| Rh3- <i>norpA</i> rescue   | Rh6- <i>norpA</i> rescue           | 18 | 18 | $1.313 \times 10^{-2}$  | t-test       | $8.295 \times 10^{-1}$ | ns  |
| Rh3- <i>norpA</i> rescue   | <i>norpA</i> <sup>36</sup> -mutant | 18 | 12 | $1.112 \times 10^{-1}$  | t-test       | $2.012 \times 10^{-2}$ | *   |
| Rh4- <i>norpA</i> rescue   | Rh5- <i>norpA</i> rescue           | 20 | 20 | $-8.746 \times 10^{-2}$ | Mann-Whitney | $3.469 \times 10^{-4}$ | *** |
| Rh4- <i>norpA</i> rescue   | Rh6- <i>norpA</i> rescue           | 20 | 18 | $-8.596 \times 10^{-2}$ | t-test       | $3.106 \times 10^{-4}$ | *** |
| Rh4- <i>norpA</i> rescue   | <i>norpA</i> <sup>36</sup> -mutant | 20 | 12 | $1.210 \times 10^{-2}$  | t-test       | $4.817 \times 10^{-1}$ | ns  |
| Rh5- <i>norpA</i> rescue   | Rh6- <i>norpA</i> rescue           | 20 | 18 | $1.505 \times 10^{-3}$  | Mann-Whitney | $8.295 \times 10^{-1}$ | ns  |
| Rh5- <i>norpA</i> rescue   | <i>norpA</i> <sup>36</sup> -mutant | 20 | 12 | $9.956 \times 10^{-2}$  | Mann-Whitney | $6.222 \times 10^{-4}$ | *** |
| Rh6- <i>norpA</i> rescue   | <i>norpA</i> <sup>36</sup> -mutant | 18 | 12 | $9.805 \times 10^{-2}$  | t-test       | $6.262 \times 10^{-5}$ | *** |

**Table S3. DPP microsaccades to 200ms Green flash**

| Group A   | Group B    | N_A | N_B | Mean difference A-B ( $\mu\text{m}$ ) | Test         | p-value (Holm-Sidak)   |     |
|-----------|------------|-----|-----|---------------------------------------|--------------|------------------------|-----|
| wild-type | UV-flies   | 16  | 18  | $5.415 \times 10^{-1}$                | Mann-Whitney | $3.122 \times 10^{-5}$ | *** |
| wild-type | <i>dSK</i> | 16  | 20  | $5.209 \times 10^{-1}$                | Mann-Whitney | $9.494 \times 10^{-5}$ | *** |

|            |                                   |    |    |                         |              |                        |     |
|------------|-----------------------------------|----|----|-------------------------|--------------|------------------------|-----|
| wild-type  | <i>hdc<sup>JK910</sup></i>        | 16 | 24 | $4.941 \times 10^{-1}$  | Mann-Whitney | $2.358 \times 10^{-4}$ | *** |
| wild-type  | <i>ninaE<sup>8</sup></i>          | 16 | 20 | $5.928 \times 10^{-1}$  | Mann-Whitney | $1.286 \times 10^{-5}$ | *** |
| wild-type  | Rh3-6- <i>norpA</i> rescue        | 16 | 20 | $5.882 \times 10^{-1}$  | Mann-Whitney | $1.286 \times 10^{-5}$ | *** |
| wild-type  | Rh1- <i>norpA</i> rescue          | 16 | 16 | $3.935 \times 10^{-1}$  | Mann-Whitney | $3.543 \times 10^{-2}$ | *   |
| wild-type  | Rh3- <i>norpA</i> rescue          | 16 | 18 | $6.311 \times 10^{-1}$  | Mann-Whitney | $1.917 \times 10^{-5}$ | *** |
| wild-type  | Rh4- <i>norpA</i> rescue          | 16 | 20 | $6.381 \times 10^{-1}$  | Mann-Whitney | $1.144 \times 10^{-5}$ | *** |
| wild-type  | Rh5- <i>norpA</i> rescue          | 16 | 20 | $6.325 \times 10^{-1}$  | Mann-Whitney | $1.144 \times 10^{-5}$ | *** |
| wild-type  | Rh6- <i>norpA</i> rescue          | 16 | 18 | $2.634 \times 10^{-1}$  | Mann-Whitney | $5.074 \times 10^{-1}$ | ns  |
| wild-type  | <i>norpA<sup>36</sup></i> -mutant | 16 | 12 | $6.420 \times 10^{-1}$  | Mann-Whitney | $1.947 \times 10^{-4}$ | *** |
| UV-flies   | <i>dSK</i>                        | 18 | 20 | $-2.065 \times 10^{-2}$ | t-test       | $8.294 \times 10^{-1}$ | ns  |
| UV-flies   | <i>hdc<sup>JK910</sup></i>        | 18 | 24 | $-4.747 \times 10^{-2}$ | Mann-Whitney | $7.324 \times 10^{-1}$ | ns  |
| UV-flies   | <i>ninaE<sup>8</sup></i>          | 18 | 20 | $5.128 \times 10^{-2}$  | Mann-Whitney | $3.543 \times 10^{-2}$ | *   |
| UV-flies   | Rh3-6- <i>norpA</i> rescue        | 18 | 20 | $4.669 \times 10^{-2}$  | t-test       | $2.149 \times 10^{-1}$ | ns  |
| UV-flies   | Rh1- <i>norpA</i> rescue          | 18 | 16 | $-1.481 \times 10^{-1}$ | Mann-Whitney | $2.518 \times 10^{-1}$ | ns  |
| UV-flies   | Rh3- <i>norpA</i> rescue          | 18 | 18 | $8.956 \times 10^{-2}$  | Mann-Whitney | $3.046 \times 10^{-5}$ | *** |
| UV-flies   | Rh4- <i>norpA</i> rescue          | 18 | 20 | $9.655 \times 10^{-2}$  | Mann-Whitney | $7.654 \times 10^{-6}$ | *** |
| UV-flies   | Rh5- <i>norpA</i> rescue          | 18 | 20 | $9.093 \times 10^{-2}$  | Mann-Whitney | $1.286 \times 10^{-5}$ | *** |
| UV-flies   | Rh6- <i>norpA</i> rescue          | 18 | 18 | $-2.782 \times 10^{-1}$ | Mann-Whitney | $6.426 \times 10^{-5}$ | *** |
| UV-flies   | <i>norpA<sup>36</sup></i> -mutant | 18 | 12 | $1.004 \times 10^{-1}$  | t-test       | $8.054 \times 10^{-5}$ | *** |
| <i>dSK</i> | <i>hdc<sup>JK910</sup></i>        | 20 | 24 | $-2.682 \times 10^{-2}$ | Mann-Whitney | $6.424 \times 10^{-1}$ | ns  |
| <i>dSK</i> | <i>ninaE<sup>8</sup></i>          | 20 | 20 | $7.193 \times 10^{-2}$  | Mann-Whitney | $2.092 \times 10^{-2}$ | *   |
| <i>dSK</i> | Rh3-6- <i>norpA</i> rescue        | 20 | 20 | $6.734 \times 10^{-2}$  | t-test       | $1.033 \times 10^{-1}$ | ns  |
| <i>dSK</i> | Rh1- <i>norpA</i> rescue          | 20 | 16 | $-1.274 \times 10^{-1}$ | Mann-Whitney | $3.071 \times 10^{-1}$ | ns  |

|                             |                                    |    |    |                         |              |                        |     |
|-----------------------------|------------------------------------|----|----|-------------------------|--------------|------------------------|-----|
| <i>dSK</i>                  | Rh3- <i>norpA</i> rescue           | 20 | 18 | $1.102 \times 10^{-1}$  | Mann-Whitney | $1.645 \times 10^{-5}$ | *** |
| <i>dSK</i>                  | Rh4- <i>norpA</i> rescue           | 20 | 20 | $1.172 \times 10^{-1}$  | Mann-Whitney | $2.606 \times 10^{-6}$ | *** |
| <i>dSK</i>                  | Rh5- <i>norpA</i> rescue           | 20 | 20 | $1.116 \times 10^{-1}$  | Mann-Whitney | $6.041 \times 10^{-6}$ | *** |
| <i>dSK</i>                  | Rh6- <i>norpA</i> rescue           | 20 | 18 | $-2.575 \times 10^{-1}$ | Mann-Whitney | $1.947 \times 10^{-4}$ | *** |
| <i>dSK</i>                  | <i>norpA</i> <sup>36</sup> -mutant | 20 | 12 | $1.211 \times 10^{-1}$  | t-test       | $2.376 \times 10^{-4}$ | *** |
| <i>hdc</i> <sup>JK910</sup> | <i>ninaE</i> <sup>8</sup>          | 24 | 20 | $9.875 \times 10^{-2}$  | Mann-Whitney | $8.294 \times 10^{-1}$ | ns  |
| <i>hdc</i> <sup>JK910</sup> | Rh3-6- <i>norpA</i> rescue         | 24 | 20 | $9.416 \times 10^{-2}$  | Mann-Whitney | $8.294 \times 10^{-1}$ | ns  |
| <i>hdc</i> <sup>JK910</sup> | Rh1- <i>norpA</i> rescue           | 24 | 16 | $-1.006 \times 10^{-1}$ | Mann-Whitney | $3.071 \times 10^{-1}$ | ns  |
| <i>hdc</i> <sup>JK910</sup> | Rh3- <i>norpA</i> rescue           | 24 | 18 | $1.370 \times 10^{-1}$  | Mann-Whitney | $1.264 \times 10^{-1}$ | ns  |
| <i>hdc</i> <sup>JK910</sup> | Rh4- <i>norpA</i> rescue           | 24 | 20 | $1.440 \times 10^{-1}$  | Mann-Whitney | $3.523 \times 10^{-2}$ | *   |
| <i>hdc</i> <sup>JK910</sup> | Rh5- <i>norpA</i> rescue           | 24 | 20 | $1.384 \times 10^{-1}$  | Mann-Whitney | $9.852 \times 10^{-2}$ | ns  |
| <i>hdc</i> <sup>JK910</sup> | Rh6- <i>norpA</i> rescue           | 24 | 18 | $-2.307 \times 10^{-1}$ | Mann-Whitney | $1.148 \times 10^{-3}$ | **  |
| <i>hdc</i> <sup>JK910</sup> | <i>norpA</i> <sup>36</sup> -mutant | 24 | 12 | $1.479 \times 10^{-1}$  | Mann-Whitney | $3.591 \times 10^{-2}$ | *   |
| <i>ninaE</i> <sup>8</sup>   | Rh3-6- <i>norpA</i> rescue         | 20 | 20 | $-4.586 \times 10^{-3}$ | Mann-Whitney | $8.294 \times 10^{-1}$ | ns  |
| <i>ninaE</i> <sup>8</sup>   | Rh1- <i>norpA</i> rescue           | 20 | 16 | $-1.994 \times 10^{-1}$ | Mann-Whitney | $1.349 \times 10^{-3}$ | **  |
| <i>ninaE</i> <sup>8</sup>   | Rh3- <i>norpA</i> rescue           | 20 | 18 | $3.828 \times 10^{-2}$  | Mann-Whitney | $2.640 \times 10^{-3}$ | **  |
| <i>ninaE</i> <sup>8</sup>   | Rh4- <i>norpA</i> rescue           | 20 | 20 | $4.527 \times 10^{-2}$  | Mann-Whitney | $8.054 \times 10^{-5}$ | *** |
| <i>ninaE</i> <sup>8</sup>   | Rh5- <i>norpA</i> rescue           | 20 | 20 | $3.965 \times 10^{-2}$  | Mann-Whitney | $1.002 \times 10^{-3}$ | **  |
| <i>ninaE</i> <sup>8</sup>   | Rh6- <i>norpA</i> rescue           | 20 | 18 | $-3.295 \times 10^{-1}$ | Mann-Whitney | $1.027 \times 10^{-5}$ | *** |
| <i>ninaE</i> <sup>8</sup>   | <i>norpA</i> <sup>36</sup> -mutant | 20 | 12 | $4.913 \times 10^{-2}$  | Mann-Whitney | $4.332 \times 10^{-4}$ | *** |
| Rh3-6- <i>norpA</i> rescue  | Rh1- <i>norpA</i> rescue           | 20 | 16 | $-1.948 \times 10^{-1}$ | Mann-Whitney | $5.386 \times 10^{-3}$ | **  |
| Rh3-6- <i>norpA</i> rescue  | Rh3- <i>norpA</i> rescue           | 20 | 18 | $4.287 \times 10^{-2}$  | Mann-Whitney | $1.095 \times 10^{-2}$ | *   |
| Rh3-6- <i>norpA</i> rescue  | Rh4- <i>norpA</i> rescue           | 20 | 20 | $4.986 \times 10^{-2}$  | Mann-Whitney | $2.376 \times 10^{-4}$ | *** |

|                            |                                    |    |    |                         |              |                        |     |
|----------------------------|------------------------------------|----|----|-------------------------|--------------|------------------------|-----|
| Rh3-6- <i>norpA</i> rescue | Rh5- <i>norpA</i> rescue           | 20 | 20 | $4.424 \times 10^{-2}$  | Mann-Whitney | $3.973 \times 10^{-3}$ | **  |
| Rh3-6- <i>norpA</i> rescue | Rh6- <i>norpA</i> rescue           | 20 | 18 | $-3.249 \times 10^{-1}$ | Mann-Whitney | $1.440 \times 10^{-5}$ | *** |
| Rh3-6- <i>norpA</i> rescue | <i>norpA</i> <sup>36</sup> -mutant | 20 | 12 | $5.371 \times 10^{-2}$  | t-test       | $2.640 \times 10^{-3}$ | **  |
| Rh1- <i>norpA</i> rescue   | Rh3- <i>norpA</i> rescue           | 16 | 18 | $2.377 \times 10^{-1}$  | Mann-Whitney | $2.173 \times 10^{-4}$ | *** |
| Rh1- <i>norpA</i> rescue   | Rh4- <i>norpA</i> rescue           | 16 | 20 | $2.446 \times 10^{-1}$  | Mann-Whitney | $7.445 \times 10^{-5}$ | *** |
| Rh1- <i>norpA</i> rescue   | Rh5- <i>norpA</i> rescue           | 16 | 20 | $2.390 \times 10^{-1}$  | Mann-Whitney | $1.081 \times 10^{-4}$ | *** |
| Rh1- <i>norpA</i> rescue   | Rh6- <i>norpA</i> rescue           | 16 | 18 | $-1.301 \times 10^{-1}$ | Mann-Whitney | $3.071 \times 10^{-1}$ | ns  |
| Rh1- <i>norpA</i> rescue   | <i>norpA</i> <sup>36</sup> -mutant | 16 | 12 | $2.485 \times 10^{-1}$  | Mann-Whitney | $5.693 \times 10^{-4}$ | *** |
| Rh3- <i>norpA</i> rescue   | Rh4- <i>norpA</i> rescue           | 18 | 20 | $6.993 \times 10^{-3}$  | Mann-Whitney | $5.566 \times 10^{-1}$ | ns  |
| Rh3- <i>norpA</i> rescue   | Rh5- <i>norpA</i> rescue           | 18 | 20 | $1.372 \times 10^{-3}$  | Mann-Whitney | $8.294 \times 10^{-1}$ | ns  |
| Rh3- <i>norpA</i> rescue   | Rh6- <i>norpA</i> rescue           | 18 | 18 | $-3.677 \times 10^{-1}$ | Mann-Whitney | $1.144 \times 10^{-5}$ | *** |
| Rh3- <i>norpA</i> rescue   | <i>norpA</i> <sup>36</sup> -mutant | 18 | 12 | $1.085 \times 10^{-2}$  | Mann-Whitney | $3.071 \times 10^{-1}$ | ns  |
| Rh4- <i>norpA</i> rescue   | Rh5- <i>norpA</i> rescue           | 20 | 20 | $-5.622 \times 10^{-3}$ | Mann-Whitney | $6.424 \times 10^{-1}$ | ns  |
| Rh4- <i>norpA</i> rescue   | Rh6- <i>norpA</i> rescue           | 20 | 18 | $-3.747 \times 10^{-1}$ | Mann-Whitney | $5.004 \times 10^{-6}$ | *** |
| Rh4- <i>norpA</i> rescue   | <i>norpA</i> <sup>36</sup> -mutant | 20 | 12 | $3.853 \times 10^{-3}$  | Mann-Whitney | $7.289 \times 10^{-1}$ | ns  |
| Rh5- <i>norpA</i> rescue   | Rh6- <i>norpA</i> rescue           | 20 | 18 | $-3.691 \times 10^{-1}$ | Mann-Whitney | $5.004 \times 10^{-6}$ | *** |
| Rh5- <i>norpA</i> rescue   | <i>norpA</i> <sup>36</sup> -mutant | 20 | 12 | $9.475 \times 10^{-3}$  | Mann-Whitney | $3.071 \times 10^{-1}$ | ns  |
| Rh6- <i>norpA</i> rescue   | <i>norpA</i> <sup>36</sup> -mutant | 18 | 12 | $3.786 \times 10^{-1}$  | Mann-Whitney | $1.149 \times 10^{-4}$ | *** |

**Table S4. DPP microsaccades to 200ms UV flash**

| Group A   | Group B                     | N_A | N_B | Mean difference A-B (mV) | Test         | p-value (Holm-Sidak)   |     |
|-----------|-----------------------------|-----|-----|--------------------------|--------------|------------------------|-----|
| wild-type | UV-flies                    | 11  | 6   | -2.962                   | Mann-Whitney | $1.450 \times 10^{-2}$ | *   |
| wild-type | <i>dSK</i>                  | 11  | 20  | $3.121 \times 10^{-1}$   | Mann-Whitney | $5.316 \times 10^{-1}$ | ns  |
| wild-type | <i>hdc</i> <sup>JK910</sup> | 11  | 8   | -2.909                   | t-test       | $4.876 \times 10^{-5}$ | *** |



|            |                                    |    |    |                           |              |                          |     |
|------------|------------------------------------|----|----|---------------------------|--------------|--------------------------|-----|
| wild-type  | <i>ninaE</i> <sup>8</sup>          | 11 | 20 | -2.686                    | Mann-Whitney | 1.601 x 10 <sup>-4</sup> | *** |
| wild-type  | Rh3-6- <i>norpA</i> rescue         | 11 | 20 | -3.336                    | Mann-Whitney | 1.601 x 10 <sup>-4</sup> | *** |
| wild-type  | Rh1- <i>norpA</i> rescue           | 11 | 8  | -9.439 x 10 <sup>-1</sup> | t-test       | 4.097 x 10 <sup>-1</sup> | ns  |
| wild-type  | Rh3- <i>norpA</i> rescue           | 11 | 9  | -3.975                    | t-test       | 2.734 x 10 <sup>-6</sup> | *** |
| wild-type  | Rh4- <i>norpA</i> rescue           | 11 | 10 | -4.460                    | t-test       | 1.077 x 10 <sup>-6</sup> | *** |
| wild-type  | Rh5- <i>norpA</i> rescue           | 11 | 10 | -4.759                    | t-test       | 1.347 x 10 <sup>-6</sup> | *** |
| wild-type  | Rh6- <i>norpA</i> rescue           | 11 | 7  | -4.711                    | Mann-Whitney | 7.492 x 10 <sup>-3</sup> | **  |
| wild-type  | <i>norpA</i> <sup>36</sup> -mutant | 11 | 12 | -5.037                    | t-test       | 9.915 x 10 <sup>-7</sup> | *** |
| UV-flies   | <i>dSK</i>                         | 6  | 20 | 3.274                     | Mann-Whitney | 6.316 x 10 <sup>-3</sup> | **  |
| UV-flies   | <i>hdc</i> <sup>JK910</sup>        | 6  | 8  | 5.328 x 10 <sup>-2</sup>  | Mann-Whitney | 5.316 x 10 <sup>-1</sup> | ns  |
| UV-flies   | <i>ninaE</i> <sup>8</sup>          | 6  | 20 | 2.764 x 10 <sup>-1</sup>  | Mann-Whitney | 5.316 x 10 <sup>-1</sup> | ns  |
| UV-flies   | Rh3-6- <i>norpA</i> rescue         | 6  | 20 | -3.735 x 10 <sup>-1</sup> | Mann-Whitney | 4.652 x 10 <sup>-1</sup> | ns  |
| UV-flies   | Rh1- <i>norpA</i> rescue           | 6  | 8  | 2.018                     | Mann-Whitney | 6.217 x 10 <sup>-2</sup> | ns  |
| UV-flies   | Rh3- <i>norpA</i> rescue           | 6  | 9  | -1.012                    | Mann-Whitney | 4.233 x 10 <sup>-1</sup> | ns  |
| UV-flies   | Rh4- <i>norpA</i> rescue           | 6  | 10 | -1.498                    | Mann-Whitney | 6.217 x 10 <sup>-2</sup> | ns  |
| UV-flies   | Rh5- <i>norpA</i> rescue           | 6  | 10 | -1.797                    | Mann-Whitney | 1.434 x 10 <sup>-2</sup> | *   |
| UV-flies   | Rh6- <i>norpA</i> rescue           | 6  | 7  | -1.749                    | Mann-Whitney | 2.524 x 10 <sup>-2</sup> | *   |
| UV-flies   | <i>norpA</i> <sup>36</sup> -mutant | 6  | 12 | -2.074                    | Mann-Whitney | 1.056 x 10 <sup>-2</sup> | *   |
| <i>dSK</i> | <i>hdc</i> <sup>JK910</sup>        | 20 | 8  | -3.221                    | Mann-Whitney | 1.750 x 10 <sup>-3</sup> | **  |
| <i>dSK</i> | <i>ninaE</i> <sup>8</sup>          | 20 | 20 | -2.998                    | Mann-Whitney | 1.362 x 10 <sup>-5</sup> | *** |
| <i>dSK</i> | Rh3-6- <i>norpA</i> rescue         | 20 | 20 | -3.648                    | Mann-Whitney | 2.141 x 10 <sup>-6</sup> | *** |
| <i>dSK</i> | Rh1- <i>norpA</i> rescue           | 20 | 8  | -1.256                    | Mann-Whitney | 4.152 x 10 <sup>-2</sup> | *   |
| <i>dSK</i> | Rh3- <i>norpA</i> rescue           | 20 | 9  | -4.287                    | Mann-Whitney | 5.395 x 10 <sup>-4</sup> | *** |

|                             |                                    |    |    |                         |              |                        |     |
|-----------------------------|------------------------------------|----|----|-------------------------|--------------|------------------------|-----|
| <i>dSK</i>                  | Rh4- <i>norpA</i> rescue           | 20 | 10 | -4.772                  | Mann-Whitney | $3.002 \times 10^{-4}$ | *** |
| <i>dSK</i>                  | Rh5- <i>norpA</i> rescue           | 20 | 10 | -5.071                  | Mann-Whitney | $3.002 \times 10^{-4}$ | *** |
| <i>dSK</i>                  | Rh6- <i>norpA</i> rescue           | 20 | 7  | -5.023                  | Mann-Whitney | $2.015 \times 10^{-3}$ | **  |
| <i>dSK</i>                  | <i>norpA</i> <sup>36</sup> -mutant | 20 | 12 | -5.349                  | Mann-Whitney | $9.225 \times 10^{-5}$ | *** |
| <i>hdc</i> <sup>JK910</sup> | <i>ninaE</i> <sup>8</sup>          | 8  | 20 | $2.231 \times 10^{-1}$  | Mann-Whitney | $3.927 \times 10^{-1}$ | ns  |
| <i>hdc</i> <sup>JK910</sup> | Rh3-6- <i>norpA</i> rescue         | 8  | 20 | $-4.268 \times 10^{-1}$ | Mann-Whitney | $3.835 \times 10^{-2}$ | *   |
| <i>hdc</i> <sup>JK910</sup> | Rh1- <i>norpA</i> rescue           | 8  | 8  | 1.965                   | t-test       | $1.625 \times 10^{-2}$ | *   |
| <i>hdc</i> <sup>JK910</sup> | Rh3- <i>norpA</i> rescue           | 8  | 9  | -1.066                  | t-test       | $3.816 \times 10^{-4}$ | *** |
| <i>hdc</i> <sup>JK910</sup> | Rh4- <i>norpA</i> rescue           | 8  | 10 | -1.551                  | t-test       | $7.458 \times 10^{-6}$ | *** |
| <i>hdc</i> <sup>JK910</sup> | Rh5- <i>norpA</i> rescue           | 8  | 10 | -1.850                  | t-test       | $2.224 \times 10^{-5}$ | *** |
| <i>hdc</i> <sup>JK910</sup> | Rh6- <i>norpA</i> rescue           | 8  | 7  | -1.802                  | Mann-Whitney | $1.450 \times 10^{-2}$ | *   |
| <i>hdc</i> <sup>JK910</sup> | <i>norpA</i> <sup>36</sup> -mutant | 8  | 12 | -2.128                  | t-test       | $2.364 \times 10^{-5}$ | *** |
| <i>ninaE</i> <sup>8</sup>   | Rh3-6- <i>norpA</i> rescue         | 20 | 20 | $-6.499 \times 10^{-1}$ | Mann-Whitney | $2.332 \times 10^{-3}$ | **  |
| <i>ninaE</i> <sup>8</sup>   | Rh1- <i>norpA</i> rescue           | 20 | 8  | 1.742                   | Mann-Whitney | $8.961 \times 10^{-3}$ | **  |
| <i>ninaE</i> <sup>8</sup>   | Rh3- <i>norpA</i> rescue           | 20 | 9  | -1.289                  | Mann-Whitney | $2.214 \times 10^{-3}$ | **  |
| <i>ninaE</i> <sup>8</sup>   | Rh4- <i>norpA</i> rescue           | 20 | 10 | -1.775                  | Mann-Whitney | $7.598 \times 10^{-4}$ | *** |
| <i>ninaE</i> <sup>8</sup>   | Rh5- <i>norpA</i> rescue           | 20 | 10 | -2.073                  | Mann-Whitney | $3.002 \times 10^{-4}$ | *** |
| <i>ninaE</i> <sup>8</sup>   | Rh6- <i>norpA</i> rescue           | 20 | 7  | -2.026                  | Mann-Whitney | $2.015 \times 10^{-3}$ | **  |
| <i>ninaE</i> <sup>8</sup>   | <i>norpA</i> <sup>36</sup> -mutant | 20 | 12 | -2.351                  | Mann-Whitney | $9.225 \times 10^{-5}$ | *** |
| Rh3-6- <i>norpA</i> rescue  | Rh1- <i>norpA</i> rescue           | 20 | 8  | 2.392                   | Mann-Whitney | $9.760 \times 10^{-4}$ | *** |
| Rh3-6- <i>norpA</i> rescue  | Rh3- <i>norpA</i> rescue           | 20 | 9  | $-6.389 \times 10^{-1}$ | Mann-Whitney | $1.056 \times 10^{-2}$ | *   |
| Rh3-6- <i>norpA</i> rescue  | Rh4- <i>norpA</i> rescue           | 20 | 10 | -1.125                  | Mann-Whitney | $6.595 \times 10^{-4}$ | *** |
| Rh3-6- <i>norpA</i> rescue  | Rh5- <i>norpA</i> rescue           | 20 | 10 | -1.423                  | Mann-Whitney | $3.002 \times 10^{-4}$ | *** |

|                            |                                    |    |    |                         |              |                        |     |
|----------------------------|------------------------------------|----|----|-------------------------|--------------|------------------------|-----|
| Rh3-6- <i>norpA</i> rescue | Rh6- <i>norpA</i> rescue           | 20 | 7  | -1.376                  | Mann-Whitney | $2.015 \times 10^{-3}$ | **  |
| Rh3-6- <i>norpA</i> rescue | <i>norpA</i> <sup>36</sup> -mutant | 20 | 12 | -1.701                  | Mann-Whitney | $9.225 \times 10^{-5}$ | *** |
| Rh1- <i>norpA</i> rescue   | Rh3- <i>norpA</i> rescue           | 8  | 9  | -3.031                  | t-test       | $2.015 \times 10^{-3}$ | **  |
| Rh1- <i>norpA</i> rescue   | Rh4- <i>norpA</i> rescue           | 8  | 10 | -3.516                  | t-test       | $8.761 \times 10^{-4}$ | *** |
| Rh1- <i>norpA</i> rescue   | Rh5- <i>norpA</i> rescue           | 8  | 10 | -3.815                  | t-test       | $7.377 \times 10^{-4}$ | *** |
| Rh1- <i>norpA</i> rescue   | Rh6- <i>norpA</i> rescue           | 8  | 7  | -3.767                  | Mann-Whitney | $1.450 \times 10^{-2}$ | *   |
| Rh1- <i>norpA</i> rescue   | <i>norpA</i> <sup>36</sup> -mutant | 8  | 12 | -4.093                  | t-test       | $5.395 \times 10^{-4}$ | *** |
| Rh3- <i>norpA</i> rescue   | Rh4- <i>norpA</i> rescue           | 9  | 10 | $-4.857 \times 10^{-1}$ | t-test       | $1.768 \times 10^{-2}$ | *   |
| Rh3- <i>norpA</i> rescue   | Rh5- <i>norpA</i> rescue           | 9  | 10 | $-7.842 \times 10^{-1}$ | t-test       | $4.833 \times 10^{-4}$ | *** |
| Rh3- <i>norpA</i> rescue   | Rh6- <i>norpA</i> rescue           | 9  | 7  | $-7.367 \times 10^{-1}$ | Mann-Whitney | $1.130 \times 10^{-2}$ | *   |
| Rh3- <i>norpA</i> rescue   | <i>norpA</i> <sup>36</sup> -mutant | 9  | 12 | -1.062                  | t-test       | $1.250 \times 10^{-4}$ | *** |
| Rh4- <i>norpA</i> rescue   | Rh5- <i>norpA</i> rescue           | 10 | 10 | $-2.985 \times 10^{-1}$ | t-test       | $6.217 \times 10^{-2}$ | ns  |
| Rh4- <i>norpA</i> rescue   | Rh6- <i>norpA</i> rescue           | 10 | 7  | $-2.510 \times 10^{-1}$ | Mann-Whitney | $1.868 \times 10^{-1}$ | ns  |
| Rh4- <i>norpA</i> rescue   | <i>norpA</i> <sup>36</sup> -mutant | 10 | 12 | $-5.763 \times 10^{-1}$ | t-test       | $1.686 \times 10^{-3}$ | **  |
| Rh5- <i>norpA</i> rescue   | Rh6- <i>norpA</i> rescue           | 10 | 7  | $4.752 \times 10^{-2}$  | Mann-Whitney | $4.847 \times 10^{-1}$ | ns  |
| Rh5- <i>norpA</i> rescue   | <i>norpA</i> <sup>36</sup> -mutant | 10 | 12 | $-2.778 \times 10^{-1}$ | t-test       | $5.395 \times 10^{-4}$ | *** |
| Rh6- <i>norpA</i> rescue   | <i>norpA</i> <sup>36</sup> -mutant | 7  | 12 | $-3.253 \times 10^{-1}$ | Mann-Whitney | $6.316 \times 10^{-3}$ | **  |

**Table S5. ERG-responses to 200ms Green flash**

| Group A   | Group B                     | N_A | N_B | Mean difference A-B (mV) | Test         | p-value (Holm-Sidak)   |    |
|-----------|-----------------------------|-----|-----|--------------------------|--------------|------------------------|----|
| wild-type | UV-flies                    | 11  | 4   | -2.584                   | Mann-Whitney | $5.831 \times 10^{-2}$ | ns |
| wild-type | <i>dSK</i>                  | 11  | 20  | $-2.233 \times 10^{-1}$  | t-test       | $9.756 \times 10^{-1}$ | ns |
| wild-type | <i>hdc</i> <sup>JK910</sup> | 11  | 8   | -1.374                   | Mann-Whitney | $1.428 \times 10^{-1}$ | ns |
| wild-type | <i>ninaE</i> <sup>8</sup>   | 11  | 20  | -2.160                   | t-test       | $1.880 \times 10^{-2}$ | *  |

|            |                                    |    |    |                         |              |                         |     |
|------------|------------------------------------|----|----|-------------------------|--------------|-------------------------|-----|
| wild-type  | Rh3-6- <i>norpA</i> rescue         | 11 | 20 | -2.319                  | t-test       | $1.240 \times 10^{-2}$  | *   |
| wild-type  | Rh1- <i>norpA</i> rescue           | 11 | 8  | $2.824 \times 10^{-1}$  | t-test       | $9.756 \times 10^{-1}$  | ns  |
| wild-type  | Rh3- <i>norpA</i> rescue           | 11 | 9  | -2.698                  | t-test       | $4.917 \times 10^{-3}$  | **  |
| wild-type  | Rh4- <i>norpA</i> rescue           | 11 | 10 | -2.729                  | t-test       | $4.660 \times 10^{-3}$  | **  |
| wild-type  | Rh5- <i>norpA</i> rescue           | 11 | 10 | -2.692                  | t-test       | $4.917 \times 10^{-3}$  | **  |
| wild-type  | Rh6- <i>norpA</i> rescue           | 11 | 7  | -2.445                  | Mann-Whitney | $1.036 \times 10^{-2}$  | *   |
| wild-type  | <i>norpA</i> <sup>36</sup> -mutant | 11 | 12 | -2.727                  | t-test       | $4.660 \times 10^{-3}$  | **  |
| UV-flies   | <i>dSK</i>                         | 4  | 20 | 2.361                   | Mann-Whitney | $2.841 \times 10^{-2}$  | *   |
| UV-flies   | <i>hdc</i> <sup>JK910</sup>        | 4  | 8  | 1.210                   | Mann-Whitney | $8.531 \times 10^{-2}$  | ns  |
| UV-flies   | <i>ninaE</i> <sup>8</sup>          | 4  | 20 | $4.236 \times 10^{-1}$  | Mann-Whitney | $7.966 \times 10^{-2}$  | ns  |
| UV-flies   | Rh3-6- <i>norpA</i> rescue         | 4  | 20 | $2.645 \times 10^{-1}$  | Mann-Whitney | $1.065 \times 10^{-1}$  | ns  |
| UV-flies   | Rh1- <i>norpA</i> rescue           | 4  | 8  | 2.866                   | Mann-Whitney | $8.531 \times 10^{-2}$  | ns  |
| UV-flies   | Rh3- <i>norpA</i> rescue           | 4  | 9  | $-1.141 \times 10^{-1}$ | Mann-Whitney | $5.570 \times 10^{-1}$  | ns  |
| UV-flies   | Rh4- <i>norpA</i> rescue           | 4  | 10 | $-1.453 \times 10^{-1}$ | Mann-Whitney | $3.481 \times 10^{-1}$  | ns  |
| UV-flies   | Rh5- <i>norpA</i> rescue           | 4  | 10 | $-1.076 \times 10^{-1}$ | Mann-Whitney | $4.727 \times 10^{-1}$  | ns  |
| UV-flies   | Rh6- <i>norpA</i> rescue           | 4  | 7  | $1.391 \times 10^{-1}$  | Mann-Whitney | $3.816 \times 10^{-1}$  | ns  |
| UV-flies   | <i>norpA</i> <sup>36</sup> -mutant | 4  | 12 | $-1.436 \times 10^{-1}$ | Mann-Whitney | $1.428 \times 10^{-1}$  | ns  |
| <i>dSK</i> | <i>hdc</i> <sup>JK910</sup>        | 20 | 8  | -1.151                  | Mann-Whitney | $5.790 \times 10^{-2}$  | ns  |
| <i>dSK</i> | <i>ninaE</i> <sup>8</sup>          | 20 | 20 | -1.937                  | t-test       | $1.383 \times 10^{-9}$  | *** |
| <i>dSK</i> | Rh3-6- <i>norpA</i> rescue         | 20 | 20 | -2.096                  | t-test       | $7.017 \times 10^{-10}$ | *** |
| <i>dSK</i> | Rh1- <i>norpA</i> rescue           | 20 | 8  | $5.057 \times 10^{-1}$  | t-test       | $7.963 \times 10^{-1}$  | ns  |
| <i>dSK</i> | Rh3- <i>norpA</i> rescue           | 20 | 9  | -2.475                  | t-test       | $7.180 \times 10^{-11}$ | *** |
| <i>dSK</i> | Rh4- <i>norpA</i> rescue           | 20 | 10 | -2.506                  | t-test       | $4.349 \times 10^{-11}$ | *** |

|                             |                                    |    |    |                         |              |                         |     |
|-----------------------------|------------------------------------|----|----|-------------------------|--------------|-------------------------|-----|
| <i>dSK</i>                  | Rh5- <i>norpA</i> rescue           | 20 | 10 | -2.468                  | t-test       | $7.180 \times 10^{-11}$ | *** |
| <i>dSK</i>                  | Rh6- <i>norpA</i> rescue           | 20 | 7  | -2.221                  | Mann-Whitney | $2.808 \times 10^{-3}$  | **  |
| <i>dSK</i>                  | <i>norpA</i> <sup>36</sup> -mutant | 20 | 12 | -2.504                  | t-test       | $8.759 \times 10^{-11}$ | *** |
| <i>hdc</i> <sup>JK910</sup> | <i>ninaE</i> <sup>8</sup>          | 8  | 20 | $-7.862 \times 10^{-1}$ | Mann-Whitney | $1.217 \times 10^{-2}$  | *   |
| <i>hdc</i> <sup>JK910</sup> | Rh3-6- <i>norpA</i> rescue         | 8  | 20 | $-9.453 \times 10^{-1}$ | Mann-Whitney | $2.808 \times 10^{-3}$  | **  |
| <i>hdc</i> <sup>JK910</sup> | Rh1- <i>norpA</i> rescue           | 8  | 8  | 1.656                   | Mann-Whitney | $6.013 \times 10^{-2}$  | ns  |
| <i>hdc</i> <sup>JK910</sup> | Rh3- <i>norpA</i> rescue           | 8  | 9  | -1.324                  | Mann-Whitney | $1.106 \times 10^{-2}$  | *   |
| <i>hdc</i> <sup>JK910</sup> | Rh4- <i>norpA</i> rescue           | 8  | 10 | -1.355                  | Mann-Whitney | $8.712 \times 10^{-3}$  | **  |
| <i>hdc</i> <sup>JK910</sup> | Rh5- <i>norpA</i> rescue           | 8  | 10 | -1.317                  | Mann-Whitney | $8.712 \times 10^{-3}$  | **  |
| <i>hdc</i> <sup>JK910</sup> | Rh6- <i>norpA</i> rescue           | 8  | 7  | -1.071                  | Mann-Whitney | $2.096 \times 10^{-2}$  | *   |
| <i>hdc</i> <sup>JK910</sup> | <i>norpA</i> <sup>36</sup> -mutant | 8  | 12 | -1.353                  | Mann-Whitney | $4.941 \times 10^{-3}$  | **  |
| <i>ninaE</i> <sup>8</sup>   | Rh3-6- <i>norpA</i> rescue         | 20 | 20 | $-1.591 \times 10^{-1}$ | t-test       | $3.777 \times 10^{-1}$  | ns  |
| <i>ninaE</i> <sup>8</sup>   | Rh1- <i>norpA</i> rescue           | 20 | 8  | 2.443                   | t-test       | $2.808 \times 10^{-3}$  | **  |
| <i>ninaE</i> <sup>8</sup>   | Rh3- <i>norpA</i> rescue           | 20 | 9  | $-5.377 \times 10^{-1}$ | t-test       | $5.558 \times 10^{-7}$  | *** |
| <i>ninaE</i> <sup>8</sup>   | Rh4- <i>norpA</i> rescue           | 20 | 10 | $-5.689 \times 10^{-1}$ | t-test       | $2.240 \times 10^{-7}$  | *** |
| <i>ninaE</i> <sup>8</sup>   | Rh5- <i>norpA</i> rescue           | 20 | 10 | $-5.312 \times 10^{-1}$ | t-test       | $6.492 \times 10^{-7}$  | *** |
| <i>ninaE</i> <sup>8</sup>   | Rh6- <i>norpA</i> rescue           | 20 | 7  | $-2.845 \times 10^{-1}$ | Mann-Whitney | $1.353 \times 10^{-1}$  | ns  |
| <i>ninaE</i> <sup>8</sup>   | <i>norpA</i> <sup>36</sup> -mutant | 20 | 12 | $-5.672 \times 10^{-1}$ | t-test       | $2.726 \times 10^{-7}$  | *** |
| Rh3-6- <i>norpA</i> rescue  | Rh1- <i>norpA</i> rescue           | 20 | 8  | 2.602                   | t-test       | $2.166 \times 10^{-3}$  | **  |
| Rh3-6- <i>norpA</i> rescue  | Rh3- <i>norpA</i> rescue           | 20 | 9  | $-3.786 \times 10^{-1}$ | t-test       | $1.582 \times 10^{-6}$  | *** |
| Rh3-6- <i>norpA</i> rescue  | Rh4- <i>norpA</i> rescue           | 20 | 10 | $-4.098 \times 10^{-1}$ | t-test       | $9.876 \times 10^{-7}$  | *** |
| Rh3-6- <i>norpA</i> rescue  | Rh5- <i>norpA</i> rescue           | 20 | 10 | $-3.721 \times 10^{-1}$ | t-test       | $2.142 \times 10^{-6}$  | *** |
| Rh3-6- <i>norpA</i> rescue  | Rh6- <i>norpA</i> rescue           | 20 | 7  | $-1.253 \times 10^{-1}$ | Mann-Whitney | $6.003 \times 10^{-1}$  | ns  |

|                            |                                    |    |    |                           |              |                          |     |
|----------------------------|------------------------------------|----|----|---------------------------|--------------|--------------------------|-----|
| Rh3-6- <i>norpA</i> rescue | <i>norpA</i> <sup>36</sup> -mutant | 20 | 12 | -4.081 x 10 <sup>-1</sup> | t-test       | 1.620 x 10 <sup>-7</sup> | *** |
| Rh1- <i>norpA</i> rescue   | Rh3- <i>norpA</i> rescue           | 8  | 9  | -2.980                    | t-test       | 1.017 x 10 <sup>-3</sup> | **  |
| Rh1- <i>norpA</i> rescue   | Rh4- <i>norpA</i> rescue           | 8  | 10 | -3.012                    | t-test       | 9.450 x 10 <sup>-4</sup> | *** |
| Rh1- <i>norpA</i> rescue   | Rh5- <i>norpA</i> rescue           | 8  | 10 | -2.974                    | t-test       | 1.017 x 10 <sup>-3</sup> | **  |
| Rh1- <i>norpA</i> rescue   | Rh6- <i>norpA</i> rescue           | 8  | 7  | -2.727                    | Mann-Whitney | 2.096 x 10 <sup>-2</sup> | *   |
| Rh1- <i>norpA</i> rescue   | <i>norpA</i> <sup>36</sup> -mutant | 8  | 12 | -3.010                    | t-test       | 1.017 x 10 <sup>-3</sup> | **  |
| Rh3- <i>norpA</i> rescue   | Rh4- <i>norpA</i> rescue           | 9  | 10 | -3.122 x 10 <sup>-2</sup> | t-test       | 9.551 x 10 <sup>-1</sup> | ns  |
| Rh3- <i>norpA</i> rescue   | Rh5- <i>norpA</i> rescue           | 9  | 10 | 6.476 x 10 <sup>-3</sup>  | t-test       | 9.824 x 10 <sup>-1</sup> | ns  |
| Rh3- <i>norpA</i> rescue   | Rh6- <i>norpA</i> rescue           | 9  | 7  | 2.532 x 10 <sup>-1</sup>  | Mann-Whitney | 1.589 x 10 <sup>-2</sup> | *   |
| Rh3- <i>norpA</i> rescue   | <i>norpA</i> <sup>36</sup> -mutant | 9  | 12 | -2.950 x 10 <sup>-2</sup> | t-test       | 9.511 x 10 <sup>-1</sup> | ns  |
| Rh4- <i>norpA</i> rescue   | Rh5- <i>norpA</i> rescue           | 10 | 10 | 3.769 x 10 <sup>-2</sup>  | t-test       | 9.511 x 10 <sup>-1</sup> | ns  |
| Rh4- <i>norpA</i> rescue   | Rh6- <i>norpA</i> rescue           | 10 | 7  | 2.844 x 10 <sup>-1</sup>  | Mann-Whitney | 1.240 x 10 <sup>-2</sup> | *   |
| Rh4- <i>norpA</i> rescue   | <i>norpA</i> <sup>36</sup> -mutant | 10 | 12 | 1.719 x 10 <sup>-3</sup>  | t-test       | 9.824 x 10 <sup>-1</sup> | ns  |
| Rh5- <i>norpA</i> rescue   | Rh6- <i>norpA</i> rescue           | 10 | 7  | 2.467 x 10 <sup>-1</sup>  | Mann-Whitney | 2.812 x 10 <sup>-2</sup> | *   |
| Rh5- <i>norpA</i> rescue   | <i>norpA</i> <sup>36</sup> -mutant | 10 | 12 | -3.597 x 10 <sup>-2</sup> | t-test       | 9.202 x 10 <sup>-1</sup> | ns  |
| Rh6- <i>norpA</i> rescue   | <i>norpA</i> <sup>36</sup> -mutant | 7  | 12 | -2.827 x 10 <sup>-1</sup> | Mann-Whitney | 8.712 x 10 <sup>-3</sup> | **  |

### II.8.ii. Cornea-neutralization imaging R1-R7/8 photomechanics inside individual ommatidia

To complement deep pseudopupil imaging, which merges optically superpositioned individual rhabdomeres of different ommatidia into a single virtual image (14, 17), we further used the cornea-neutralization method (17) to directly examine light-induced *Drosophila* R1-R7/8 rhabdomere movements inside individual ommatidia (4) (fig. S29). The purpose of these experiments was to test how two different spatially-restricted light patterns (field or spot) activate photoreceptor microsaccades on the eye surface locally. The experiments were done with a separate bespoke imaging system built around an upright microscope (Olympus BX51), secured to an x,y-stage on an anti-vibration table (MellesGriot, UK). The system was light-shielded inside a black Faraday cage with black lightproof curtains covering its frontal opening, and the experiments were done in a dark room to minimize light pollution. Rhabdomeres were viewed with a 40x water immersion objective (Zeiss C Achroplan NIR 40x/0.8 w, ∞/0.17, Germany) and recorded with a high-speed camera (Andor Zyla, UK) at 100 frames/s.

A *Drosophila* was gently fastened to an enlarged fine-end of a 1 ml pipette tip, as explained in **Section I.1**. The fly was then positioned with a remote-controlled x,y,z-fine resolution micromanipulator (Sensapex, Finland) underneath the water immersion objective (**fig. S29A and B**), using a live video stream on a computer monitor.

**Rhabdomere imaging.** Antidromic illumination from a high-power IR light source (740 nm LED with 720 nm high-pass edge-filter, driven by Cairn OptoLED, UK) was delivered transcuticularly through the fly head, revealing R1-R7/8 rhabdomeres (**fig. S29C**), which are effectively insensitive to >720 nm red light (4), inside local ommatidia.

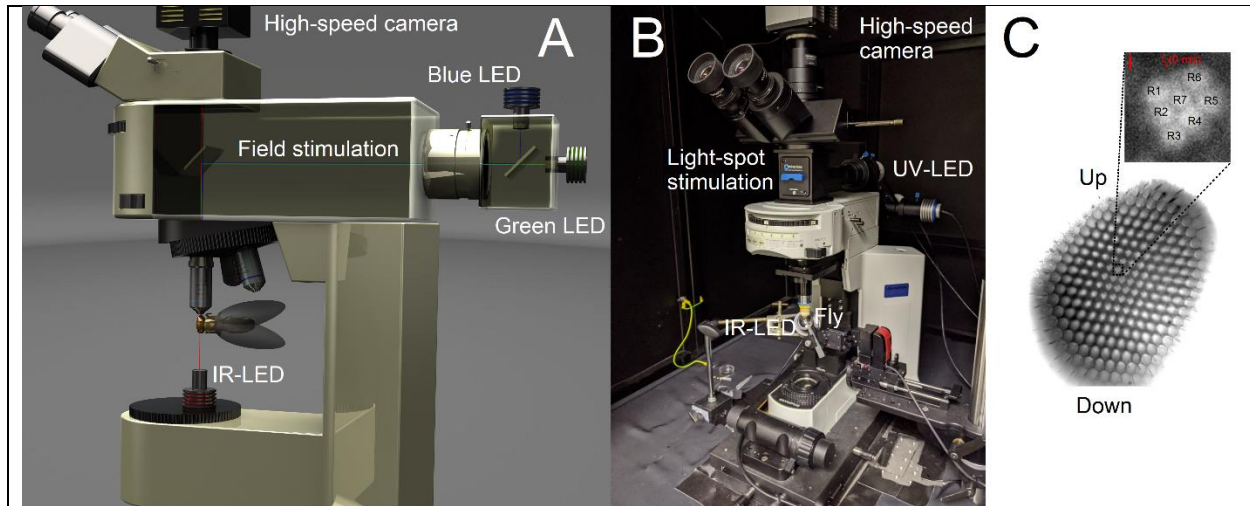

**Fig. S29. In vivo orthodromic light stimulation of local ommatidial rhabdomeres in cornea-neutralized *Drosophila* eyes.**

(A) *Light-field stimulation* was delivered by blue and green LEDs, mounted in the microscope's optical back-port, and controlled by two LED-drivers. Blue and green stimuli were first fused (by a beam-splitter) and then directed (via another beam-splitter) to the 40x-objective's center and focused on the rhabdomere tips.

(B) *Light-spot stimulation* was delivered by a Blue (470 nm) or UV (365 nm) LED through an optical pinhole contraption (Infinity-Cube, Cairn Research, UK) mounted between the microscope's turret and ocular pieces. This stimulation mode enabled highly localized flash-activation of only a few photoreceptors at a time.

(C) A typical high-speed camera's field of view of local neighboring ommatidial rhabdomeres, recorded under continuous IR-LED illumination, which does not activate photoreceptors (4). IR-imaging allowed us to capture unhindered local microsaccades (rhabdomere movements) to both the blue/green-field and blue-spot stimulation with minimal recording artifacts. Insert: the photoreceptors, which participated in the resulting microsaccades, could be identified across the ommatidia at the resolution of single rhabdomeres at each time-point (video frame) and their local dynamics revealed by cross-correlation analyses.

**Microsaccade activation.** We flashed two different orthodromic stimuli: (i) *light-field* and (ii) *light-spot* through the 40x-objective onto the left *Drosophila* eye to evoke local photoreceptor microsaccades.

- i. Two high-power LEDs delivered the field stimulation: 470 nm (blue) and 545 nm (green), each separately controlled by its own driver (Cairn OptoLED, UK) (**fig. S29A**). These peak

wavelengths were selected to activate R1-R6s' rhodopsin (Rh1) and its meta-form near maximally. Thereby, through their joint stimulation, we minimized desensitization by prolonged depolarizing after-potentials (PDA) (73). Light from the two LEDs was merged into one focused beam by a 495 nm dichroic mirror and low-pass-filtered at 590 nm. The ommatidial rhabdomere images were split spectrally by another dichroic mirror (600 nm), and effectively only red image intensity information ( $\geq 600$  nm) was sampled by the high-speed camera.

- ii. x,y-position adjustable pinhole/beam-splitter optics (Cairn Infinity-Cube, UK) produced a  $\sim 5$   $\mu\text{m}$  light-spot on rhabdomeres inside single ommatidia (**fig. S29B**). This contraction, placed in the light path between the high-speed camera and the objective, shaped and split the light from a high-power blue (470 nm) or UV (365 nm) LED (controlled by a Cairn OptoLED driver) to rhabdomeres while letting IR images to be sampled before, during and after their microsaccade activation.

**Microsaccades to light-field stimulation.** We delivered 10 ms blue/green field stimulus flashes, separated with  $\sim 3$ -minute dark periods, on a dark-adapted fly eye's local surface area. The field stimulus covered the 40x-objective's field of view, which was simultaneously imaged under continuous IR-light, exposing R1-R7/8 rhabdomere tips inside about 90-150 ommatidia, varying from one fly preparation to another; as limited by the fly mounting, pipette positioning angles, and the local eye curvature at the different imaged eye locations.

Individual rhabdomere movements inside single ommatidia were analyzed from the high-speed light-field video recordings offline. In these videos, we hand-marked 90-150 individual ommatidia (**fig. S29C**), and the cross-correlation analysis was performed separately for each ommatidium's rhabdomeres (see **Supplement II.2.iii.** for further details). Characteristically, the intra-ommatidial rhabdomere contractions (photoreceptor microsaccades) to light-field stimulation peaked within 80-140 ms, following the 10 ms light flash. The rhabdomere movement noise, analyzed 40-160 ms before the flash, was subtracted from the maximum photoreceptor microsaccade values. The ommatidia that showed smaller-than-noise motion were considered to be still (not photomechanically contracting), with their rhabdomeres not being light-activated.

The field-stimulus flashes (**fig. S30A-C**) evoked the strongest photoreceptor microsaccades in the ommatidia at the stimulus/image center, pointing directly towards the orthodromic light-field stimulator and thus experiencing direct incident light (**fig. S30D-F**). Further away from the stimulus center the intraommatidial rhabdomeres resided, the smaller (**fig. S30E**) and slower (**fig. S30F**; cf. the lognormal fits to WT fly #1 microsaccades) their microsaccades were. The rhabdomeres in the ommatidia, which were about 100- $\mu\text{m}$ -distance from the stimulus center, remained practically still, producing no noticeable photomechanical movements (**fig. S30D-F**). Nonetheless, owing to the imaging system's extreme sensitivity, some preparations/configurations inadvertently generated minute (10-70 nm) mechanical jitter, superimposing the same temporal (synchronized) noise pattern on all the simultaneously recorded intraommatidial photoreceptor microsaccades across the eye (**fig. S30**; cf. WT flies #2-3). However, such sporadic recording noise did not bias the general results about the local spatially-constrained microsaccade activation dynamics, repeatedly observed in different fly preparations.



The *Drosophila* compound eyes' two well-known architectural factors (5) best explain the observed spatiotemporal microsaccade-waning over the stimulated/imaged area:

- i. because the ommatidial tiling follows each compound eye's small radius of curvature (**fig. S30C**), their photoreceptors' RFs increasingly direct away from the brightest (incident) light
- ii. the ommatidial screening pigments in the ommatidial walls block non-incident light scatter from being absorbed by the rhabdomeres

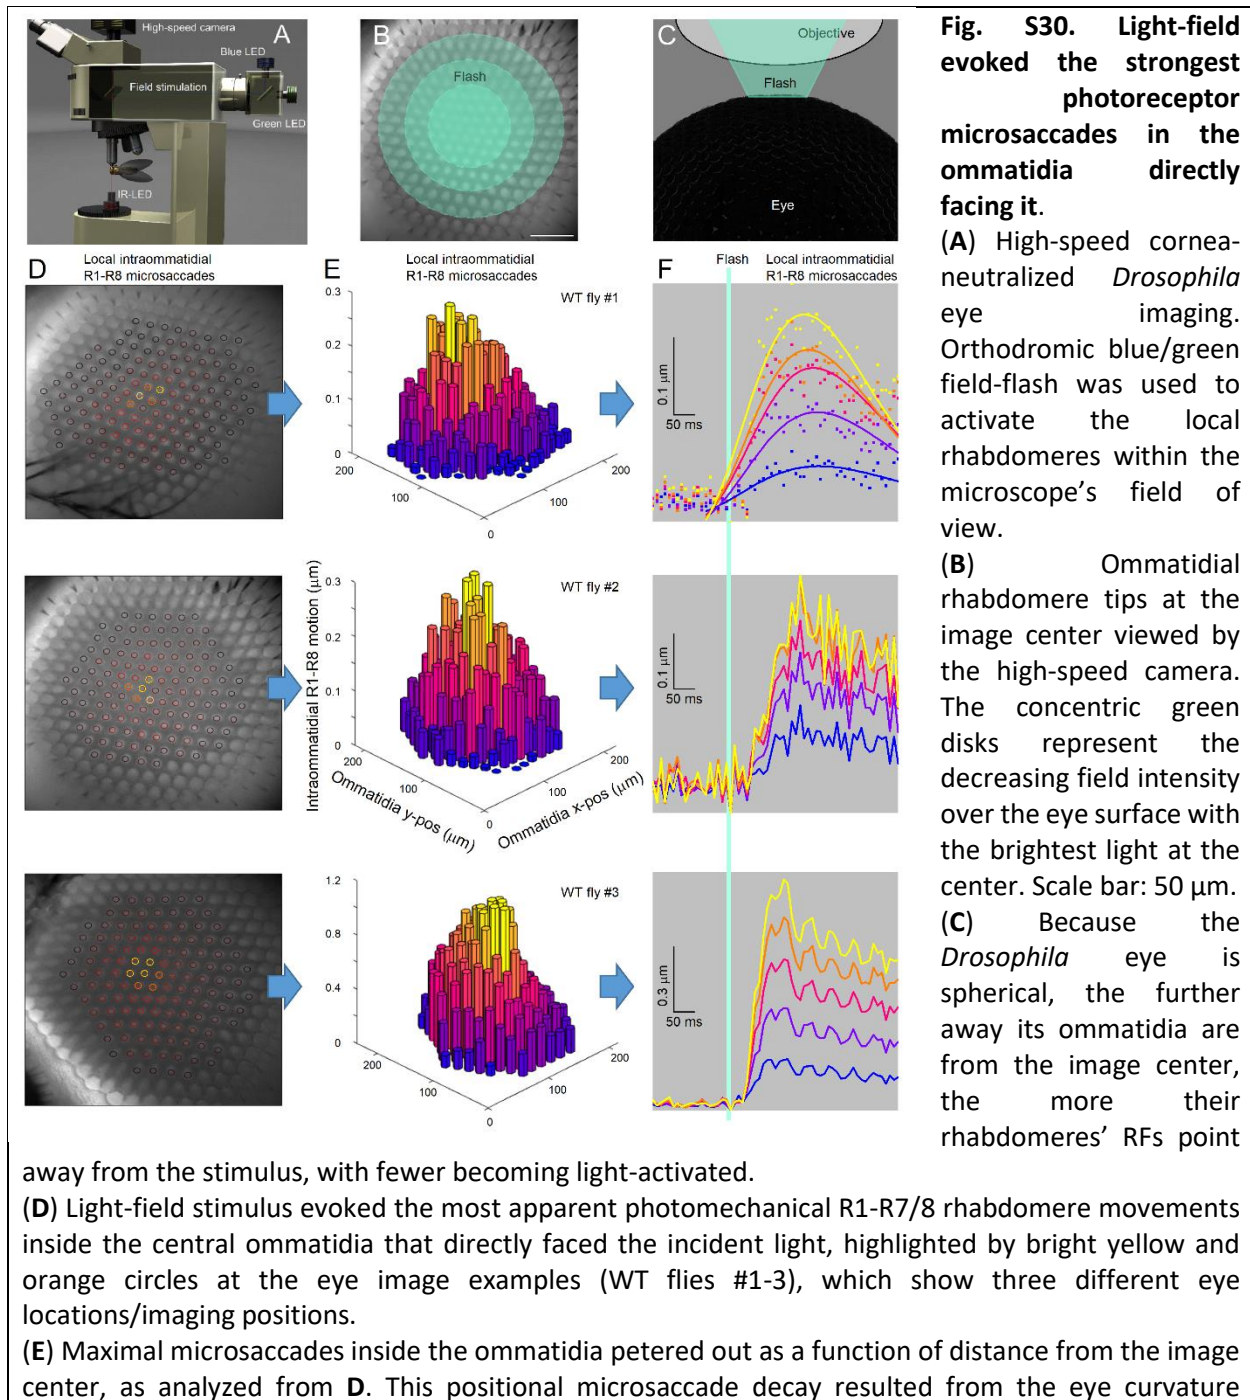

gradually shifting the photoreceptors' RFs away from the brightest (incident) light. At the same time, the ommatidial screening pigments reduced light scatter.

(F) Local eye-position-dependent microsaccades followed the characteristic light-intensity-dependent dynamics, decreasing in amplitude away from the image center. Intraommatidial microsaccades were sorted by their amplitude into five groups (as in E). The traces show the group's average response waveforms and their lognormal fits for fly#1. Mechanical jitter in the fly preparation/imaging system caused the synchronized (oscillating) 10-70 nm noise patterns on fly#2's and fly#3's microsaccadic responses. The green bar indicates a 10 ms field-stimulus flash.

The observed local microsaccades' movement directions matched those mapped by deep pseudopupil imaging (see **Section II.1.**, above). Such spatiotemporal local and global eye-map correspondences connote that intrinsic eye muscle activity, which would have moved all retinal rhabdomeres together, had little influence in these and the deep pseudopupil recordings (**fig. S15**). Therefore, the observed field-stimulus-induced microsaccades were principally photomechanical, with the photoreceptors' light absorption probability regulating their strength and velocity (**fig. S30D-E**). However, because the maximum microsaccade amplitudes varied trial-to-trial and between individual flies (**fig. S30D-E**; cf. WT flies #1-3), sometimes considerably, it is not inconceivable that *Drosophila*'s intrinsic/diurnal activity state, via feedback synapses from the higher brain centers (23, 25), could co-regulate R1-R7/8-microsaccade gain, similar to what has already been shown for R1-R6 photoreceptor voltage responses (13, 26, 28, 29, 62, 63).

These observations and results, confirmed by imaging many *Drosophila* eyes (n = 15 flies; both the left and right eyes) at different corneal locations (**fig. S30**), concur with the results from the X-ray and the deep pseudopupil imaging experiments (see **Section I** and **Sections II.1-7**, above), respectively, and is consistent with our earlier published data (4).

**Microsaccades to light-spot stimulation.** We managed to light-activate the photoreceptor rhabdomeres in single ommatidia with the light-spot stimulation, generating 0.1-0.15  $\mu\text{m}$  microsaccades (**fig. S31**), while the intraommatidial rhabdomeres across the rest of the eye remained practically still. These exceedingly local microsaccades reached their peak amplitudes ~40-80 ms after the flash onset (**fig. S31E**), showing somewhat faster dynamics than the microsaccades to the field stimulus flashes (**fig. S30E**), which peaked 80-140 ms after the flash and had longer decay times (> 100 ms).

Technically, the single-ommatidium, or single photoreceptor light-activation, was challenging and resulted in small-amplitude microsaccades involving all R1-R7/8 moving collectively inside one ommatidium, consistent with the *norpA*-rhodopsin-rescue results (see **fig. S26** in **Section II.8.i**, above). We only obtained dominant "single-ommatidium" microsaccades in 3 out of 15 tested wild-type flies (**fig. S31D-E**), as in the other 12 preparations, photoreceptor microsaccades were either also seen in the near-neighboring ommatidia (n = 2) or could not be accurately resolved (n = 10). Notably, all the 15 flies - including the shown examples (WT flies #1-3) - showed consistent photoreceptor microsaccades to light-field stimulation within a broader ommatidium population (cf. **fig. S30E**). We found two primary reasons for the light-spot stimulation experiment's low success:

- i. In some fly preparations, the photoreceptor microsaccades to the light-field stimulation were already relatively small ( $\leq 0.3 \mu\text{m}$ ). Consequently, the much dimmer light-spot

stimulation failed to evoke reliable/measurable responses (*i.e.*, microsaccades larger than the recording noise).

- ii. When the maximum microsaccade amplitudes to spot-stimulus were  $\geq 0.15 \mu\text{m}$ , the rhabdomeres in the adjacent ommatidia also contracted photomechanically; although the light-spot was smaller than the ommatidium, as seen at the microscope's focal plane. However, the conical light beam (from the microscope objective) penetrated 30-40  $\mu\text{m}$  into the eye (**fig. S31C**). Therefore, unavoidably, some scattered light reached the near-neighbor ommatidia, making their photoreceptors generate photomechanical microsaccades, together with the photoreceptors in the directly stimulated center ommatidium.

Here, the largest single-ommatidium-activated microsaccades were evoked by a spot-stimulus, which was focused right at its next-door ommatidium (**fig. S31**). These findings further indicate that in the used experimental configuration, a light-spot at the stimulated sub-ommatidial area could cross over its microscope-observed focal-plane boundaries (due to scattering) to activate photoreceptors also in its nearest ommatidial neighbor.

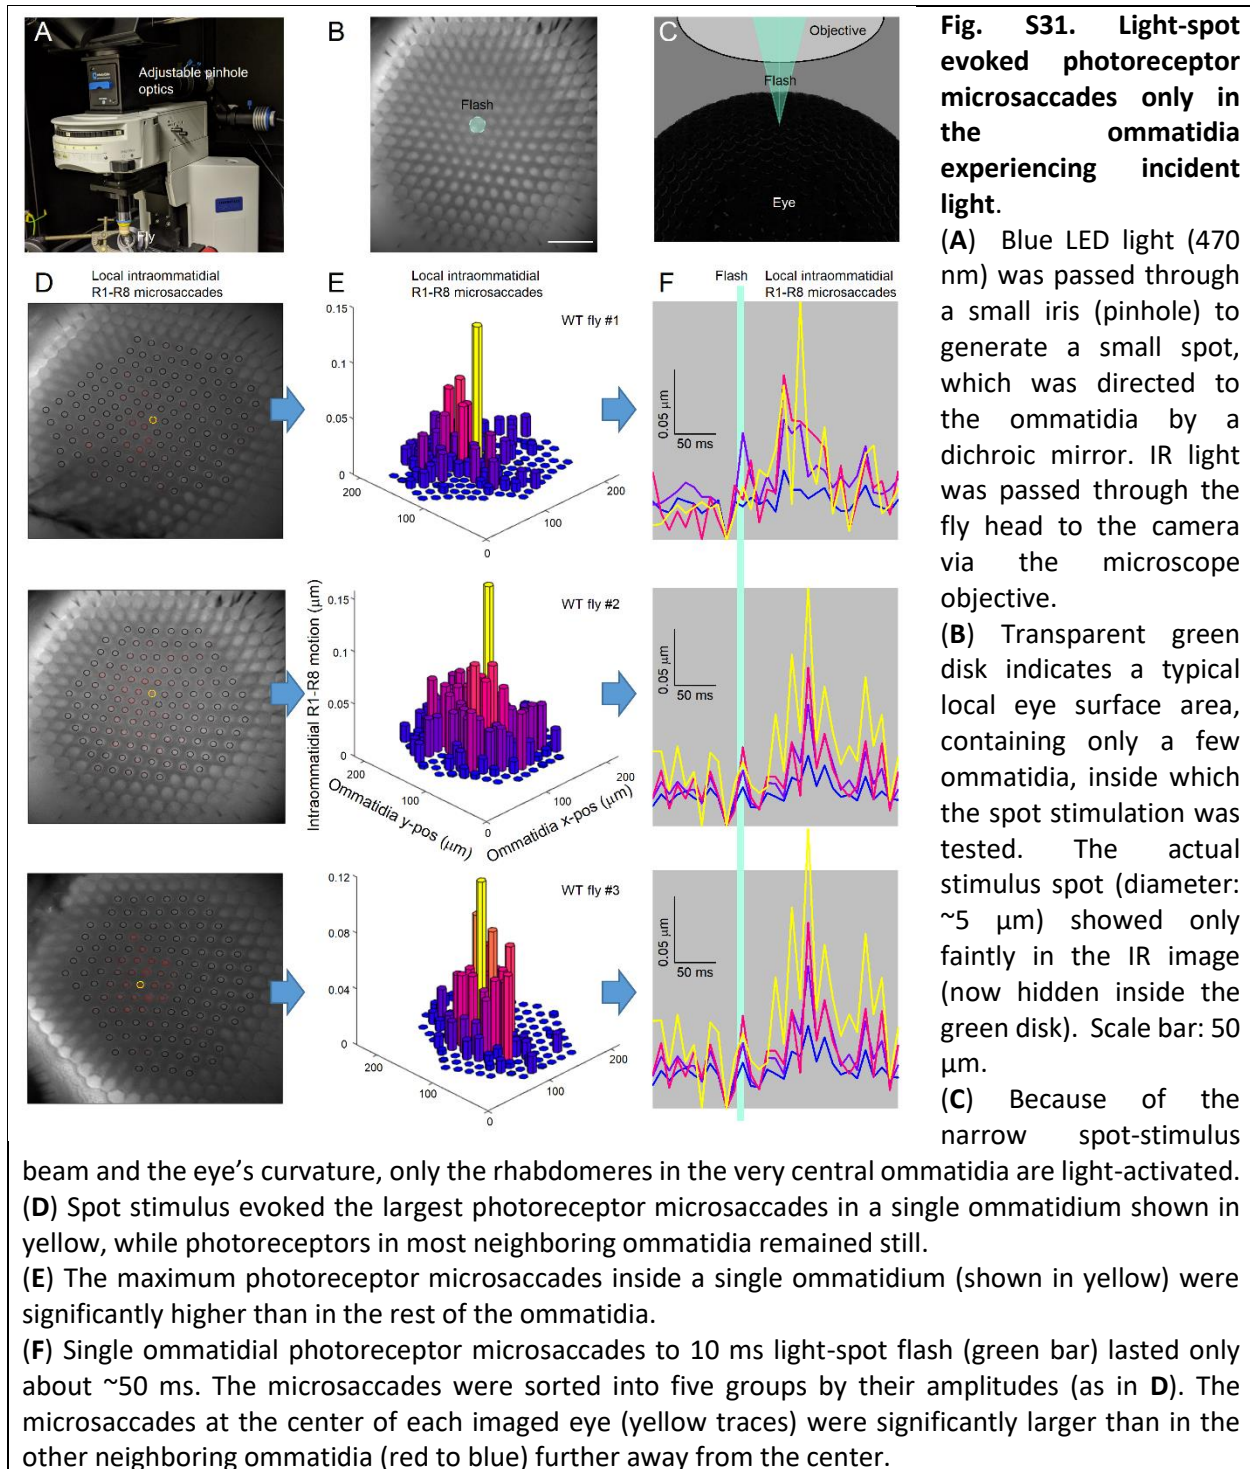

### III. *In vivo* 2-photon $\text{Ca}^{2+}$ imaging L2-neuron responses to hyperacute stimuli

#### Overview

This section describes the experimental and theoretical approaches to measure visual acuity and direction sensitivity of *Drosophila* L2 large monopolar cell terminals in the left and right *medulla-neuropil* using *in vivo* high-speed 2-photon  $\text{Ca}^{2+}$ -imaging. It gives central background information and additional supporting evidence for the results presented in the main paper, including:

- The L2-terminals transmit hyperacute visual information over a broad range of velocities.
- The L2-terminals' motion direction sensitivity is broadly co-linear to those photoreceptors' microsaccadic motion direction sensitivity that feeds visual information to them.
- Therefore, L2 neurons participate both in encoding and processing hyperacute stereoscopic and optic flow information and channeling these signals to downstream neurons.

We performed 2-photon  $\text{Ca}^{2+}$ -imaging from L2 monopolar cells in UV-flies<sup>13</sup> or in transgenic flies, which had the natural WT R1-R7/8 photoreceptor visual pigments (**Fig. 4**). These flies show normal photomechanical photoreceptor microsaccade dynamics (**fig. S32**). GCaMP6f was expressed selectively in L2s, and activity changes (fluorescence signals) to visual motion stimuli were imaged at L2 medulla terminals using a laser resonance-scanning microscope (TrimScope, La Vision Biotech, Germany) with 1 NA 40XW objective. The 2-photon excitation source was a mode-locked Ti:Sapphire Mai Tai SP Laser tuned to 920 nm. Fluorescence was collected by a photomultiplier (Hamamatsu H7422-40-LV, Japan) after bandpass filtering by a 525/50 nm emission filter. Images (approximately 150 x 1024 pixels) were acquired with ImSpectorPro software (La Vision Biotech, Germany), typically 20-25 frames/s. Besides, when imaging smaller areas (*e.g.*, 32 x 512 pixels), the used sampling rates were considerably higher (~50-200 frames/s). The laser intensity was kept below 240 mW (measured at the back aperture) to avoid heat-induced artifacts.

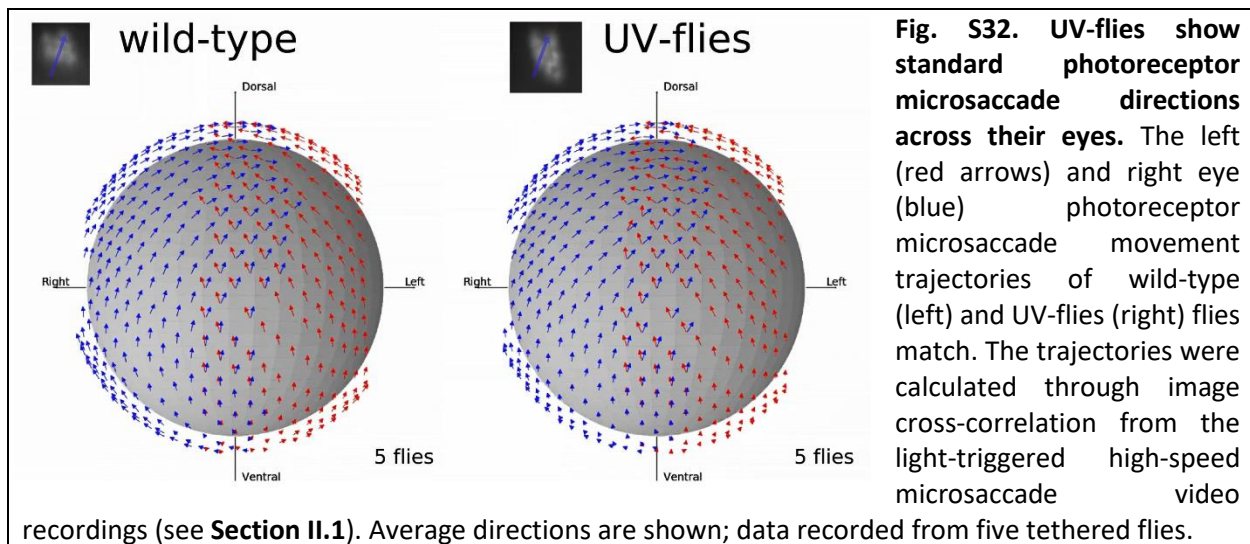

#### III.1. *In vivo* *Drosophila* preparation

2-to-4-day-old cold-anesthetized flies (usually males) were prepared for the experiments much as described before (15, 74, 75). A fly was waxed to a 0.001-inch-thick folded stainless steel shim holder, which allowed access to the back of the head through a 0.8 mm opening (**fig. S33A**). The

head was tilted forward approximately 60°, exposing its back at the opening, and left the retina below the shim (**fig. S33B**). We cut a small hole at the back of the head cuticle with a fine tungsten needle and removed connective tissue, including the trachea, to obtain optical access to the left and/or right medulla L2 axon terminals (**fig. S33A**). The fly was positioned over an air-suspended 6.13 mm Ø polypropylene ball within the 2-photon imaging system, facing panoramic visual stimulation screens to enable motor activity recording (**fig. S33C**). Closed-loop temperature-controlled (25 °C) oxygenated fly ringer solution (containing in mM: 120 NaCl, 5 KCl, 10 TES, 1.5 CaCl<sub>2</sub>, 4 MgCl<sub>2</sub>, and 30 sucrose) was perfused over the back of the head, keeping the preparation alive/healthy for hours-long experiments

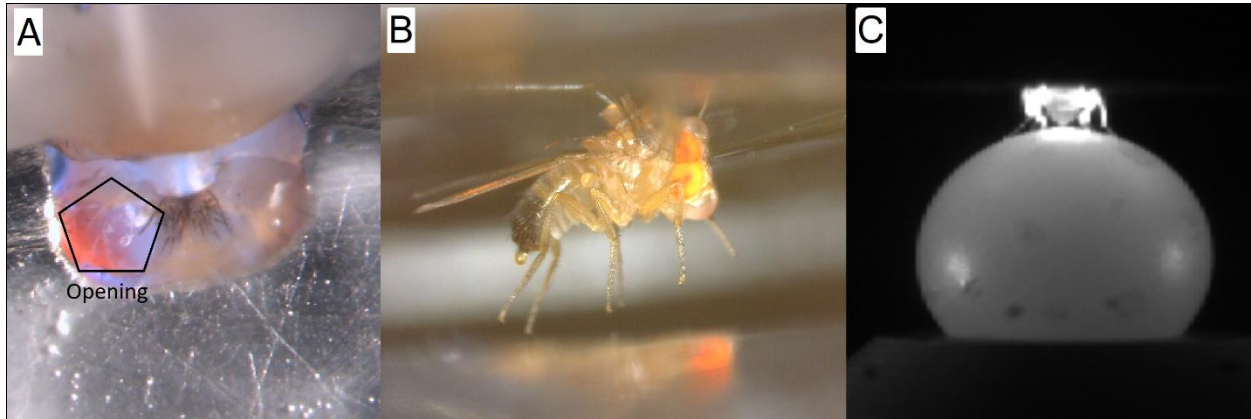

**Fig. S33. *in vivo* *Drosophila* preparation for 2-photon Ca<sup>2+</sup>-imaging.**

(A) Using a bespoke stereomicroscope/preparation micromanipulation system, we fixed a fly in the predetermined position and orientation to a 0.001-inch-thick folded stainless steel shim (of a disk-shaped fly-holder) to access the back of the head through a 0.8 mm gap, comparable to (74). A small opening was cut at the head's back cuticle through an oxygenated fly ringer bath that covered the back of the head only, giving a visual view of the left or right medulla L2-terminals.

(B) The fly's positioning inside the portable disk-shaped fly-holder. The fly-holder was transported to the 2-photon imaging system, where it was rotationally adjusted by hand to center the fly facing the panoramic visual stimulation screen (**fig. S34**, below). Notice the semi-transparent beeswax-droplet underneath the fly's eyes, immobilizing its proboscis.

(C) A tested fly could walk on a track-ball during the 2-photon imaging of its L2-terminals' neural responses (Ca<sup>2+</sup> fluorescence signals). In the experiments, the fly faced the visual stimulation screen inside a black-fabric chamber, which blocked outside light leakage and minimized scatter and internal reflections.

### III.2. Visual stimulation

**fig. S34** and **Movie S8** show the method of how ultrafine, 7.5-11.25-times finer than the *Drosophila* eyes' ~4.5° interommatidial angle (5), video stimulation was presented to *Drosophila* during their medulla L2-terminal's 2-photon Ca<sup>2+</sup>-imaging. We used a digital light projector (EKB DLP® LightCrafter™ Fiber-E4500MKII™ development module, EKB Technologies, Israel), equipped with a powerful 385 nm UV-LED, to provide 360 Hz UV-video stimulation with native 912 x 1140 pixel resolution to flies (**fig. S34A**). The UV-video images were projected on a back-projection (diffuser) screen. The whole system was inside a black, fluffy-fabric enclosed cage (**fig. S34B**) to block outside light and minimize internal reflections and scatter. Three short focal length achromatic doublet camera-lenses (MVL6WA, Thorlabs, USA) were then used to focus the

projected images onto one end of three 7 x 7 mm coherent bundles of optical fibers (IB ASSY QA x 24", Schott, USA), with  $\sim 108 \times 108$  pixels (as the counted average) projecting onto each bundle (**fig. S34C**). On the other end of the bundles, the images were transmitted and magnified by three optical tapers (Schott, USA). The tapers formed three Parafilm-capped panoramic fiber-optic-screens (virtual reality stimulation screens), surrounding a tested fly frontally (**fig. S34D**). Parafilm diffused light and damped reflections related to the numerical aperture of the taper/bundle fibers. The three fiber-optic screens accurately reproduced the video images into three angled vertical sections, positioned 38 mm from the fly eyes, filling large central parts of their left and right visual fields (total area:  $135^\circ \times 45^\circ$ ). Therefore, with  $108 \times 324$  pixels spread across the three screens, the angular resolution was  $\sim 0.6^\circ$  at the point closest to the eyes and  $\sim 0.4^\circ$  near the corners.

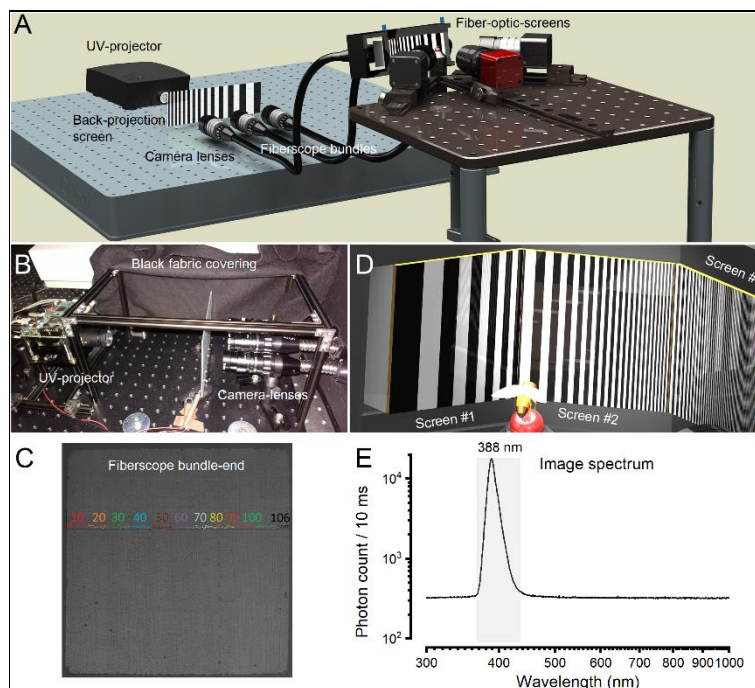

**Fig. S34. The bespoke high-resolution UV-video-display system (attached to the 2-photon imaging system) used for stimulating L2 neurons visually.**

(A) The optical path, from the high-speed UV-projector to three high-resolution fiber-optic-screens (taper ends), for presenting *Drosophila* with UV-video stimuli.

(B) UV-stimuli were projected on a UV-preserving back-projection screen. Three camera lenses sampled the focused back-projected video images on three high-resolution ordered fiberscope bundles. This optical path was kept inside a light-proof cage (covered by a thick, fluffy black fabric) to minimize light scatter

and internal reflections.

(C) One fiberscope bundle end, with the highlighted fiber count for one of its rows.

(D) The panoramic visual stimulation screen assembly was made out of three high-resolution optical tapers (fiber-optic-screens), in which angles and position could be precisely and freely adjusted and fixed around the tested fly (by the instrument design).

(E) The video-display system's spectral output, as directly measured at the visual stimulation screen facing the tested *Drosophila*. The visual stimulation was dominated by UV-light, peaking at 388 nm.

Visual stimuli were created using custom-written Matlab code, partly using the Psychophysics toolbox, in which the renderer updated images at 360 Hz, with a nominal 8-bits of DLP intensity at each pixel, and accurately projected them onto the three taper-screens. Additional UV-band-pass filters (Edmund Optics, UK; 377 nm, bandwidth 50 nm, OD 6) and adjustable apertures, interposed between the back-projection screen and the bundles, allowed us to cut off long (non-UV) tail wavelengths of the images and adjust their overall intensities. The spectrum used in experiments is shown in **fig. S34E**. We estimate that R1-R6 photoreceptors that faced the optic taper screens were presented with  $10^5$ - $10^6$  UV-photons/s, causing moderate to high light adaptation. Notice that because of the refractory photon sampling and intracellular pupil, which

cause a dramatic drop in quantum efficiency (4, 32, 48), most photons are lost during light adaptation. Consequently, an R1-R6 photoreceptor's effective photon absorption rate is actively maintained at  $\sim 1.5\text{-}8.0 \times 10^5$  to maximize its information transfer rate for high-contrast stimuli (4).

### III.3. Measuring L2-terminal sensitivity to stimulus velocity and orientation

The images about medulla L2-terminal fluorescence responses were analyzed by custom-written Python-scripts (K. Razban Haghighi). The fluorescence intensity variations were quantified after background subtraction.  $\text{Ca}^{2+}$ -signal variations were obtained by subtracting the basal fluorescence,  $F_0$ , calculated as the mean intensity before the visual stimulation, from the observed intensity,  $F$ , ( $\Delta F = F - F_0$ ) and giving this difference as the relative fluorescence change ( $\Delta F / F_0$ ).

**The use of “UV-flies” minimizes antidromic sampling artifacts.** Because the basement membrane between the lamina and retina lacks screening pigments, photoreceptors can be stimulated antidromically by shining light through the fly brain (76). Equally, during  $\text{Ca}^{2+}$ -imaging, fluorescence signals from the brain circuits propagate towards the photoreceptors. Therefore, in *Drosophila* with wild-type spectral sensitivities, the green-light-activated R1-R6s and R8<sub>yellow</sub> photoreceptors inadvertently multiplex light stimuli from the world with the L2 green-fluorescence signals from the lamina, potentially obfuscating downstream visual processing (as recorded by two-photon imaging). We used “UV-flies” (15) to overcome this problem.

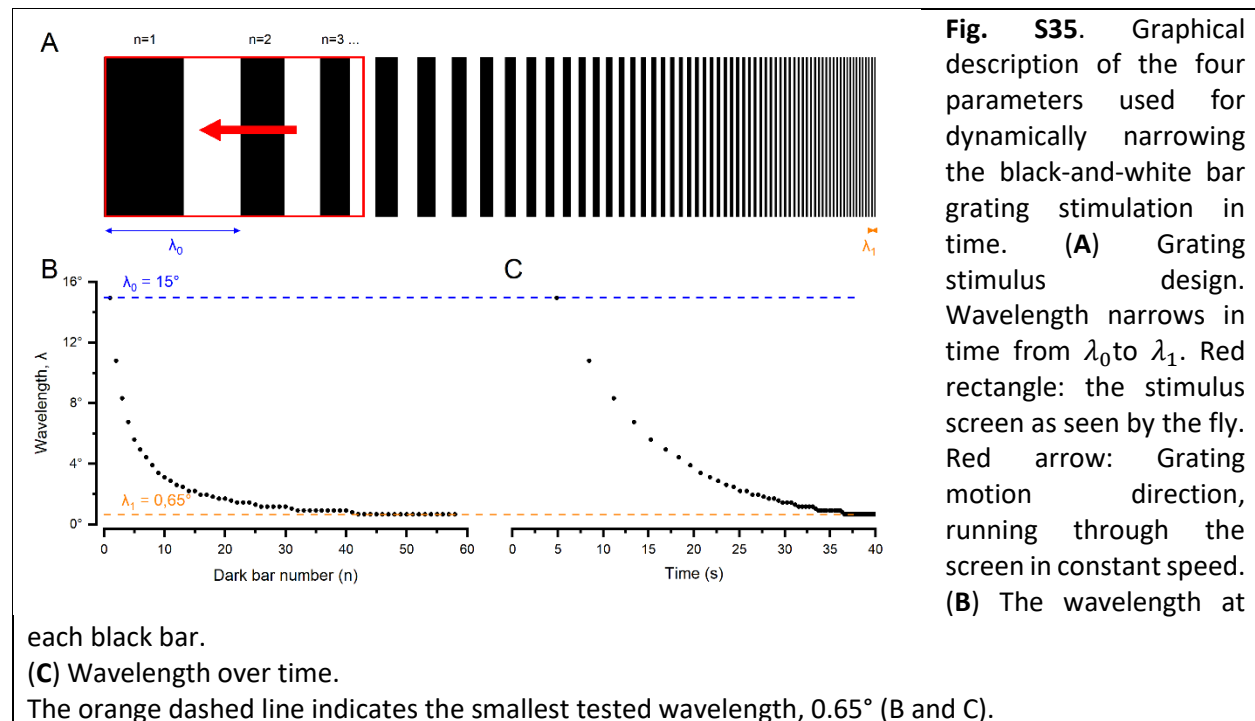

**Testing individual L2-terminals' speed and orientation sensitivity to moving stripes and bars.** L2 neurons' medulla terminals respond strongly to light-OFF stimuli (21, 22, 27). Therefore, a bright moving bar crossing an L2 neuron's receptive field (RF) evokes a transient response. Here, we used two types of moving stimuli to measure L2 speed and orientation sensitivity.



One stimulus type was made of two parallel bars crossing an L2 neuron's RF. These bars induced a two-peaked change in the observed L2-terminal calcium fluorescence as a response. We can measure how well this intraneural calcium response resolved the two moving stimuli using the Rayleigh criterion:

$$R = \frac{P_{min}-T}{P_{max}} \quad (9)$$

, where  $T$ ,  $P_{min}$  and  $P_{max}$  are the trough, the smallest peak, and the highest peak, respectively.

We further measured single L2 neurons' resolvability to dynamically narrowing bar gratings (of continuously decreasing wavelength; **fig. S35A-B**) using a novel four-parameter bar-grating stimulus, as constructed in Matlab. The stimulus parameters were the speed, motion direction, initial wavelength, and final wavelength ( $s$ ,  $\theta$ ,  $\lambda_0$  and  $\lambda_1$ , respectively). The inter-bar wavelength, which entered the tested *Drosophila*'s field of view, followed the geometric sequence update:

$$\lambda(t + dt) = \left(\frac{\lambda_1}{\lambda_0}\right)^{\frac{t}{D}} \lambda(t) \quad (10)$$

, where  $D$  was the duration of the stimulus (**fig. S35C**). This way, the wavelength was divided by a constant factor, frame after frame, enabling an accurate estimate of the wavelength/time point when the L2 neuron could no longer resolve the adjacent moving bars. A more intuitive formula representing the wavelength over time is the following:

$$\lambda(t) = \lambda_0 \left(\frac{\lambda_1}{\lambda_0}\right)^{\frac{t}{D}} \quad (11)$$

Importantly, this spatiotemporal stimulation enabled us to simultaneously monitor how the neighboring L2-terminals, in which RFs were covered by the same visual display (see above), encoded the same directional motion stimulation in different angular resolutions.

Similar to the moving two bar stimulation (above), the dynamically narrowing bar grating stimulation induced a  $\text{Ca}^{2+}$ -fluorescence signal, showing a succession of peaks. To each pair of peaks, we can attribute a resolvability. Since this stimulus induces a response with a dynamic baseline, we applied the Rayleigh criterion on the relative peak heights:

$$R = \frac{P_{min}-T}{P_{max}-T} \quad (12)$$

To make resolvability estimation consistent and free of human observer bias, we built a six hyper-parameter algorithm in Python that takes the  $\text{Ca}^{2+}$ -fluorescence signal as input and returns the smallest resolvable angle (SRA). Two of the parameters enable accurate peak detection, considering the noise in the data. One parameter is the noise-threshold:  $R = 0$ , if  $P_{min} - T$  is smaller than the threshold. The other parameter is the inter-peak noise threshold:  $R = 0$ , if the inter-peak noise is higher than the threshold. Two separate parameters were used to detect false negatives. The last pair of peaks where  $R \neq 0$  is taken as the SRA. In separate tests, the algorithm generated highly similar resolvability estimates to those provided by trained experimentalists.

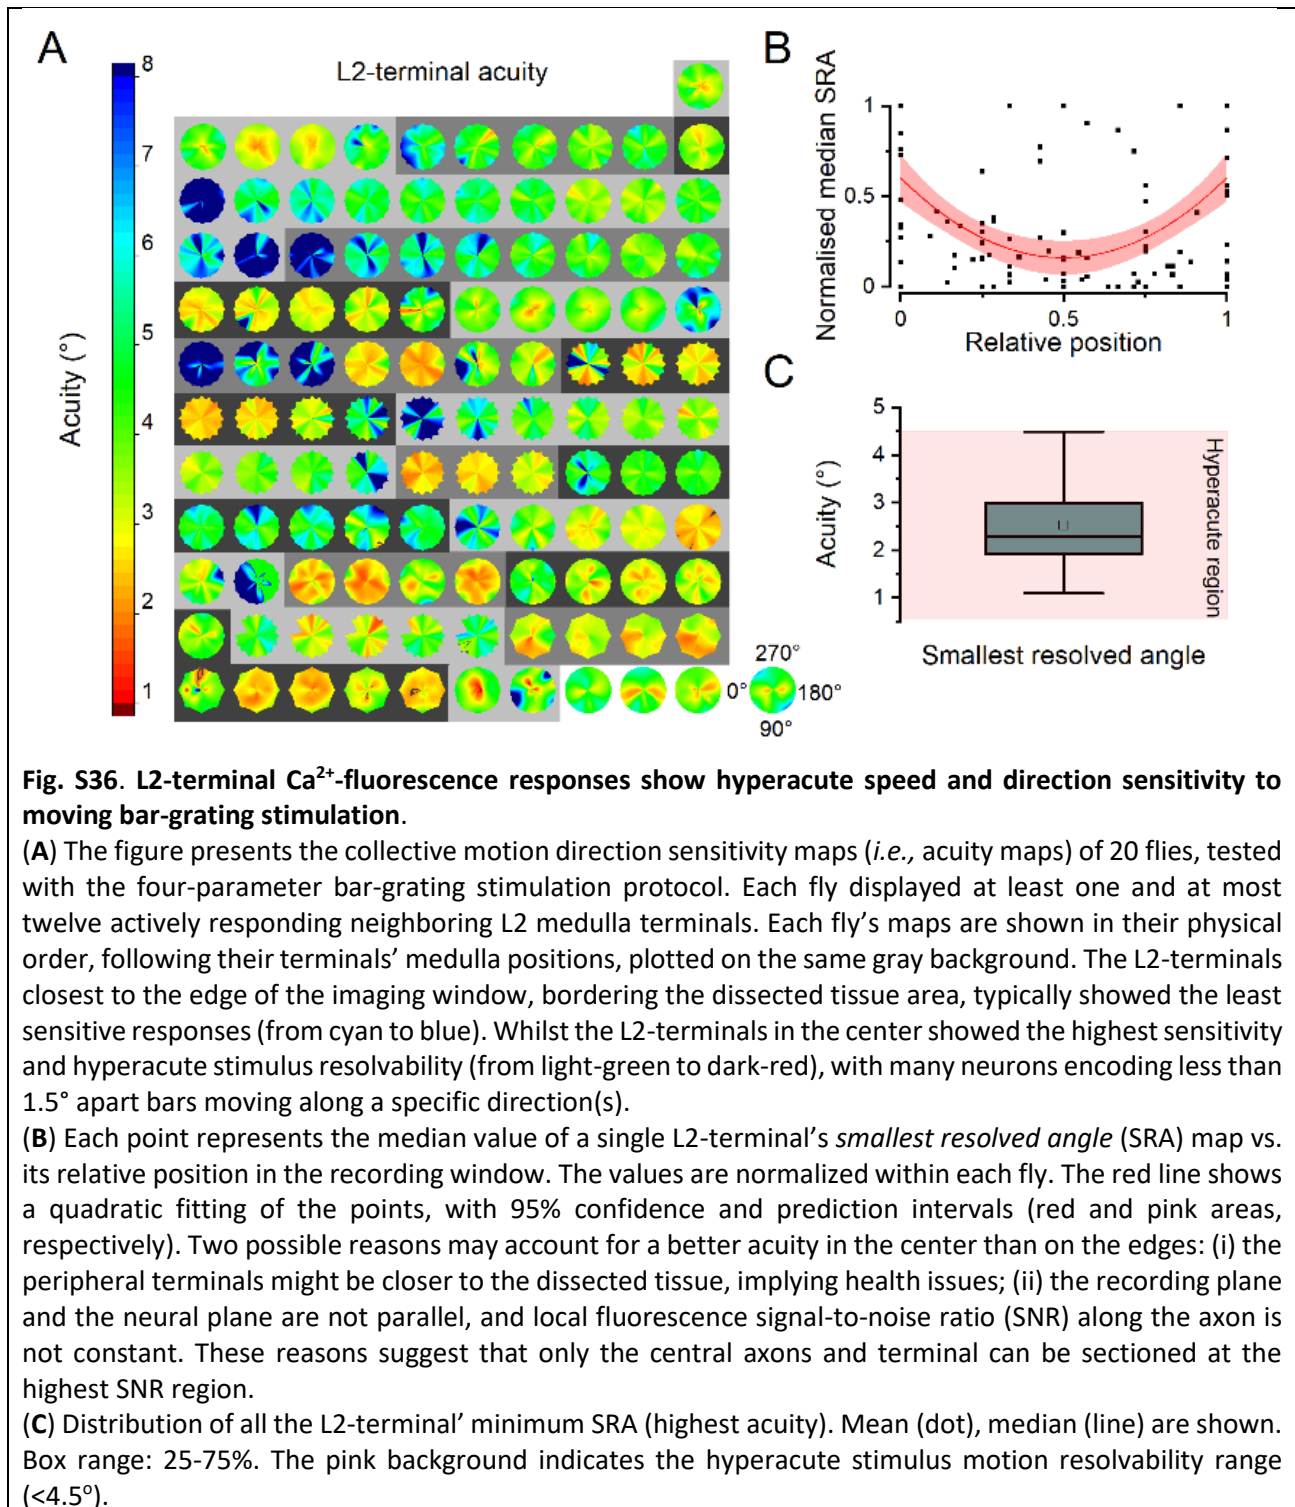

For each recording, we could monitor several (between 1 and 12) L2-terminal responses simultaneously (**fig. S36** and **fig. S37**). The stimuli were presented multiple times to the fly by varying the speed (usually  $s = 20, 30, 60^{\circ}/s$ ) and the motion direction (usually every  $15^{\circ}$  or  $30^{\circ}$ , covering  $360^{\circ}$ ). Hence, this gave us an SRA polar heat map (acuity map) for each recorded neuron

in the fly preparation (**fig. S36A** and **fig. S37A**). These SRA polar heat maps almost always suggested the best-resolved direction (the direction of highest acuity; or the stimulus direction for which SRA is smallest). To calculate it accurately and quantify the accuracy, we fitted the SRA (modulo  $180^\circ$ ) using a  $180^\circ$  fixed-wavelength sine-function with Levenberg-Marquardt iteration algorithm (**fig. S38** and **fig. S39**). The reason for this choice is that we expect periodic SRA values with minima at an angle  $\alpha$  and  $\alpha + 180^\circ$ , and a maximum at  $\alpha + 90^\circ$  and  $\alpha - 90^\circ$ . The phase (subtracted by  $45^\circ$ ) of the fitting gives us the “preferred” highest-acuity direction. We used the Levenberg-Marquardt error values as error margins (**fig. S38B**). We also evaluated these fits with the  $R^2$  value. Given that Gaussian noise sinusoidal fitting has an  $R^2$  distribution with mean = 5.8% and rarely reaches 15%, we considered that a clear preferred direction for L2 SRA fitting was when  $R > 25\%$  ( $\sim Err < 12^\circ$ ) (**fig. S37B-D** and **fig. S39**).

We calculated each recorded L2 neuron’s receptive field (RF) location using two stimuli: a single light bar moving back and forth horizontally and another vertically. We considered each terminal’s peak responses induced by the bar leaving its receptive field (characteristic of an OFF response). This correspondence enabled us to reconstruct a good approximation of the RF boundaries.

Therefore, for each tested fly, we attained a map of its L2-terminals’ highest-acuity directions positioned at the corresponding receptive field locations (**fig. S37C** and **fig. S39**).

We used data from the best-dissected (or healthiest) fly preparations in the main results (**Fig. 4**), which displayed at least eight consecutive neurons with consistent activity (**fig. S37**). We found that:

- The most preferred directions are collinear to the connected photoreceptors’ motion direction (**fig. S37C**). This assessment excluded the most peripherally recorded terminals because these outliers typically showed inconsistent responses, suggesting either compromised health at the dissected tissue boundary (**fig. S36B** and **fig. S37B-D**) or variable SNR along the axons where the highest cannot be recorded on every axon since the recorded section plane, and the actual neural plane are not parallel.
- The preferred directions shifted systematically about  $5^\circ$  from neighbor to neighbor (**fig. S37B-D**), similar to the gradual shifting of the photoreceptor motion directions (**fig. S32**).

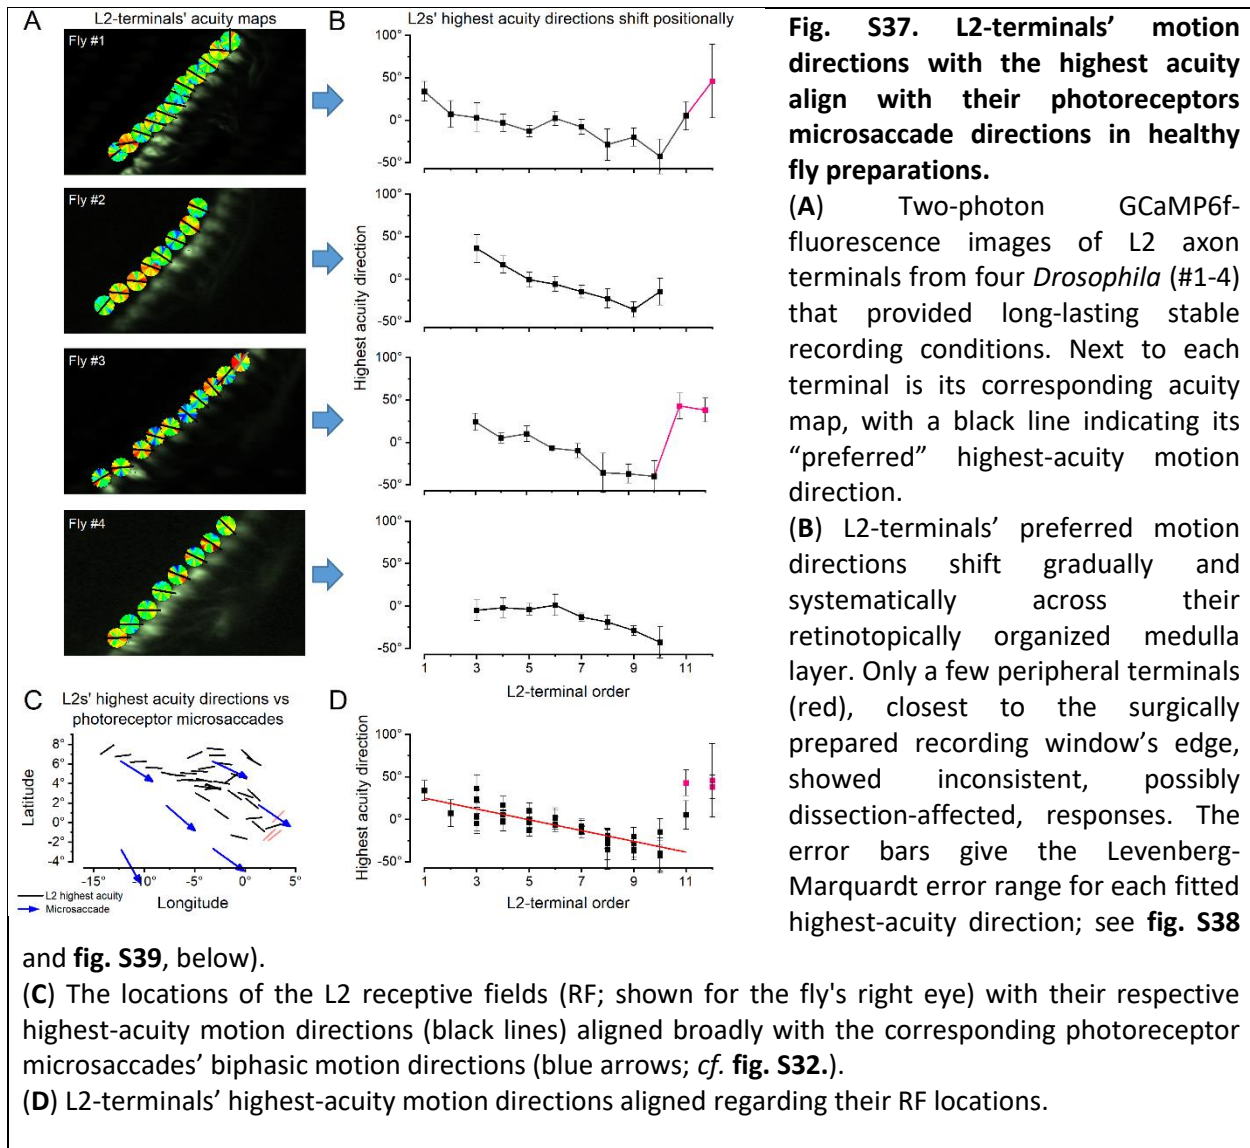

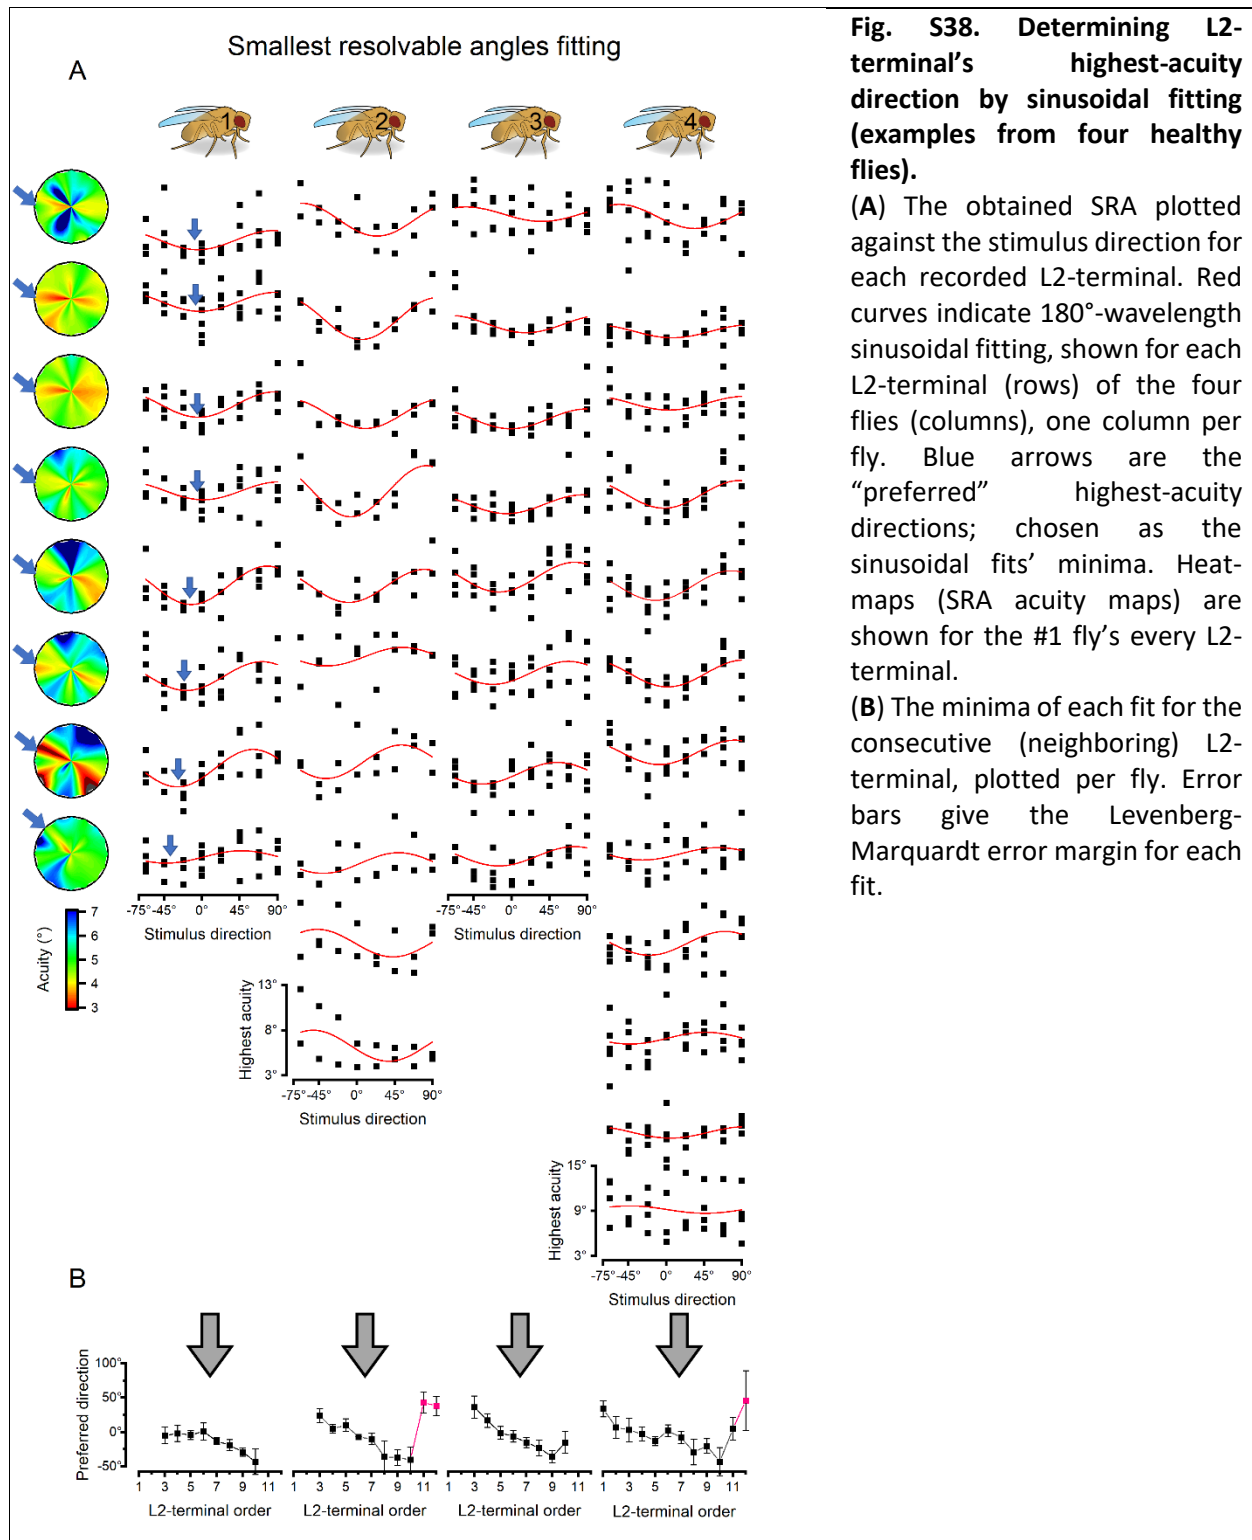

**Fig. S38. Determining L2-terminal's highest-acuity direction by sinusoidal fitting (examples from four healthy flies).**

(A) The obtained SRA plotted against the stimulus direction for each recorded L2-terminal. Red curves indicate  $180^\circ$ -wavelength sinusoidal fitting, shown for each L2-terminal (rows) of the four flies (columns), one column per fly. Blue arrows are the "preferred" highest-acuity directions; chosen as the sinusoidal fits' minima. Heat-maps (SRA acuity maps) are shown for the #1 fly's every L2-terminal.

(B) The minima of each fit for the consecutive (neighboring) L2-terminal, plotted per fly. Error bars give the Levenberg-Marquardt error margin for each fit.

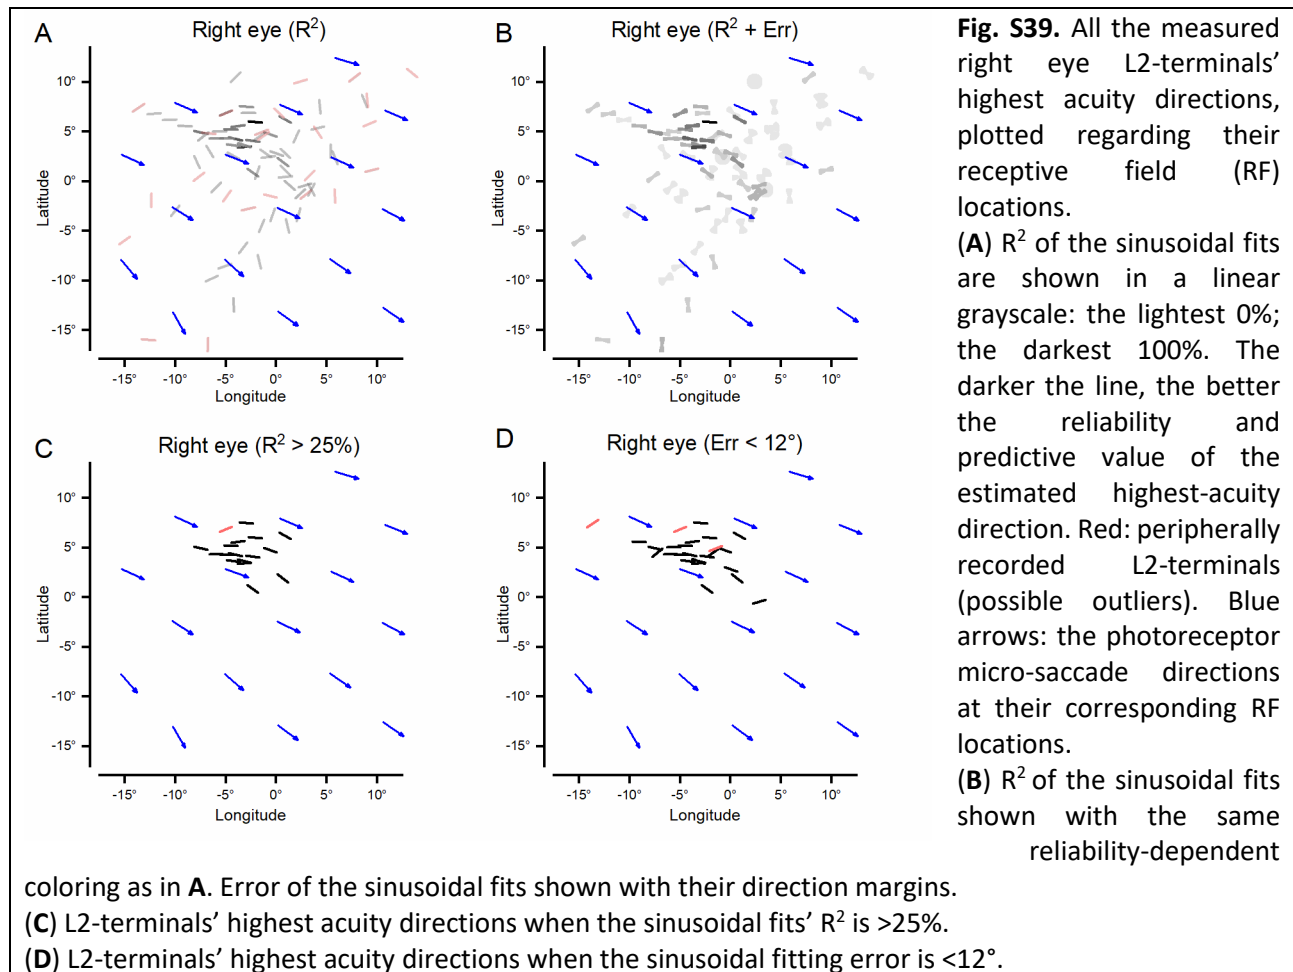

**Sampling aliasing prevention.** To concurrently image many L2-terminals with a high signal-to-noise ratio, we used relatively low frame-rates of 20-25 fps (*i.e.*, each complete image frame was sampled at ~20 Hz), which could be prone to sampling aliasing; if the actual light-stimulus-induced fluorescence changes happened faster than the sampling. However, several factors ensured that aliasing effects on the data were minimal:

- Each image frame is not an instant snapshot but built up by scanning its pixels line-by-line in ultra-high-speed (each pixel in ~50 ns). Thus, both the used resonant scanner's line-scan-rate and the recorded local  $Ca^{2+}$ -signals' (pixel-wise) spatiotemporal correlations are much faster than the full image frame rate and the underlying  $Ca^{2+}$ -fluorescence dynamics.
- The Shannon-Nyquist sampling theorem states that no information is lost if the sampling rate is higher than twice the signal's maximum frequency. Hence the minimum consistent value for SRA (smallest resolvable angle) follows the rule:

$$\alpha_{min} > \frac{\omega}{f_s} \quad (13)$$

, where  $\alpha_{min}$ ,  $\omega$  and  $f_s$  are respectively the minimum inter-bar distance used for the SRA,

stimulus motion speed, and sampling rate. Those minimum values for the SRA were rarely reached, so the risk of aliasing was minimal.

- The sampling rate was never kept constant in the recordings, thus minimizing any systematic aliasing effects. Theoretically, aliasing causes central symmetrically spreading patterns in the recorded images, such as fake rigs or harmonic ringing (4), which never occurred in the SRA maps.
- Control experiments with much higher frame rates (85-145 fps) generated even higher L2-terminal acuity maps than those with 20 fps sampling, but with similar directional selectivity trends, showing clear hyperacuity and specific highest acuity motion directions. The acuity map trends for the 20 fps and >85 fps sampling started to differ only at the highest tested velocity stimuli (60°/s). One acuity map for 85 fps sampling was included in **fig. S36**. Overall, we found a suggestively higher L2-terminal hyperacuity for the higher sampling rate data (**fig. S40**):
  - *High fps*:  $2.20^\circ \pm 0.25^\circ$  (mean  $\pm$  SD); SRA =  $1.93^\circ$ , Median =  $2.17^\circ$ , Max =  $2.5^\circ$  (n = 6 L2-terminals)
  - *Low fps*:  $2.53^\circ \pm 0.82^\circ$  (mean  $\pm$  SD); SRA =  $1.09^\circ$ , Median =  $2.31^\circ$ , Max =  $6^\circ$  (n = 117 L2-terminals)

Therefore, in light of all this evidence, together with *Drosophila*'s striking hyperacute visual behaviors in a flight simulator system (4, 62) (**Section V**, below) and faster intracellular voltage responses (15, 26-29, 61-63), we are confident that we present reliable and conservative estimates (lower bounds) of the L2-terminals' direction-selective hyperacuity (for the given experimental conditions, instrumental noise, and sampling limitations). A freely flying *Drosophila*'s visual acuity can only be better in natural environments and could even be significantly higher.

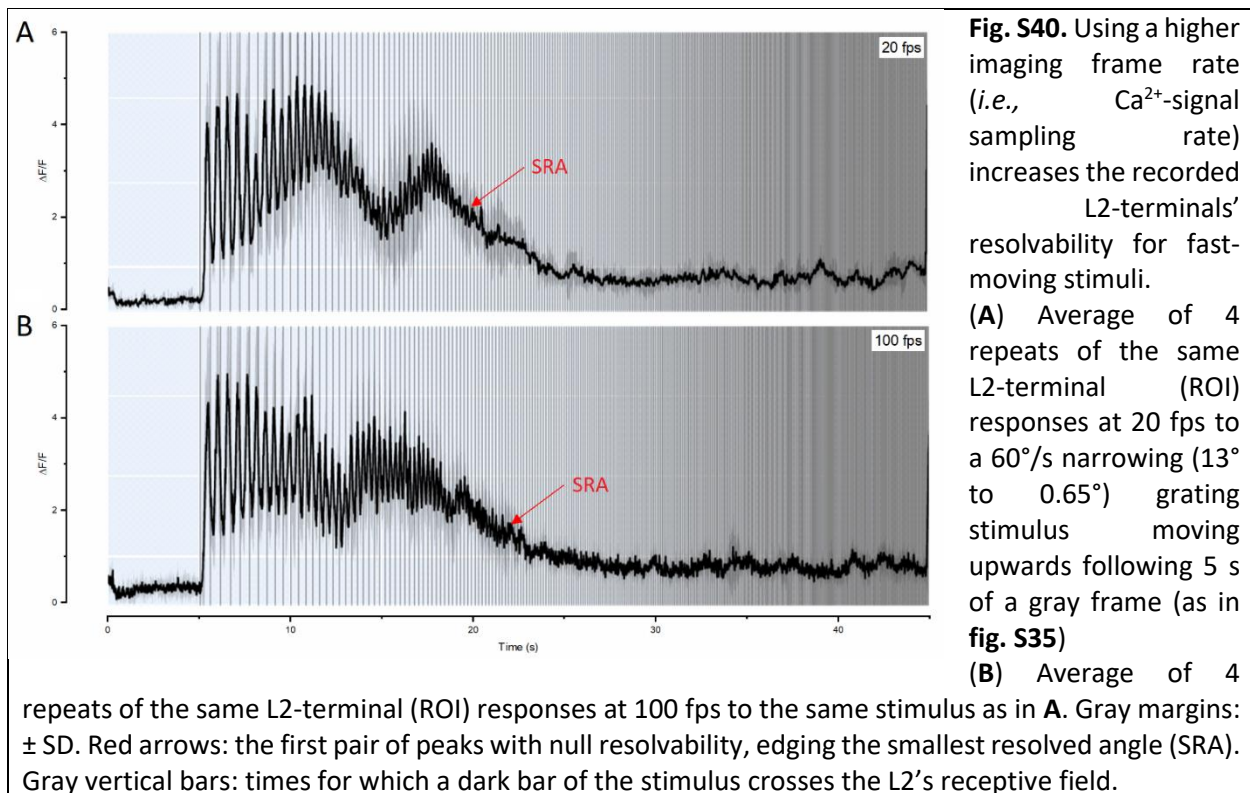

**Removing motion artifacts in L2-terminals'  $Ca^{2+}$ -signals.** Both photomechanical photoreceptor microsaccades and spontaneous intraocular muscle contractions can move the fly brain during 2-photon imaging. We used a computer vision and machine learning library (open-cv) to write a stabilization algorithm in Python. Two main functions were needed: one (*goodFeaturesToTrack*) finds the most prominent corners in the image or the specified image region, as described in a proposed algorithm that uses Newton-Raphson style search methods (77). The other (*calcOpticalFlowPyrLK*) calculates an optical flow for a sparse feature set using the iterative Lucas-Kanade method with pyramids.

We used this technique on recordings where the motion artifacts moved the L2-terminal away from the region of interest (ROI) window (typically  $\sim 2\mu\text{m}$ ). This technique enabled the ROI fluorescence average to be coherently correlated with the neural activity and not affected by physical displacement. **fig. S41** shows the resulting displacements for some cases. Interestingly, the displacements were sometimes stimulus-locked: **fig. S41B** shows slower displacement at the beginning but faster around the end of the stimulus. A high sampling rate ( $\sim 85$  Hz) shows a robust synchronization between the displacement and the stimulus (**fig. S41A**). Two phenomena could explain this:

- The stimulus-induced fluorescence variations themselves may fool the stabilization algorithm by faking a motion. However, this phenomenon is unlikely because applying the stabilization algorithm on the stabilized video only resulted in small and noisy motion residuals.
- The fast stimulus-locked L2-terminal displacements are likely induced by the photoreceptor microsaccades, analogous to the photomechanical tissue displacement recorded during the X-ray imaging experiments. Indeed, as seen in **fig. S32**, photoreceptors move photomechanically back-and-forth along the main axis each time a bar crosses their receptive fields, and such motion could similarly drive L2-terminal displacement in **fig. S41A**. The collective evidence from separate experiments using different assays is already compelling, but for conclusive proof, an additional displacement analysis on activity-independent fluorescence (such as Tomato dye) can be done in the future. Note that the small L2-terminal displacements, such as the one seen in **fig. S41A**, had no real effect on the recorded fluorescence signals, so subtracting them made no difference in the analyses.



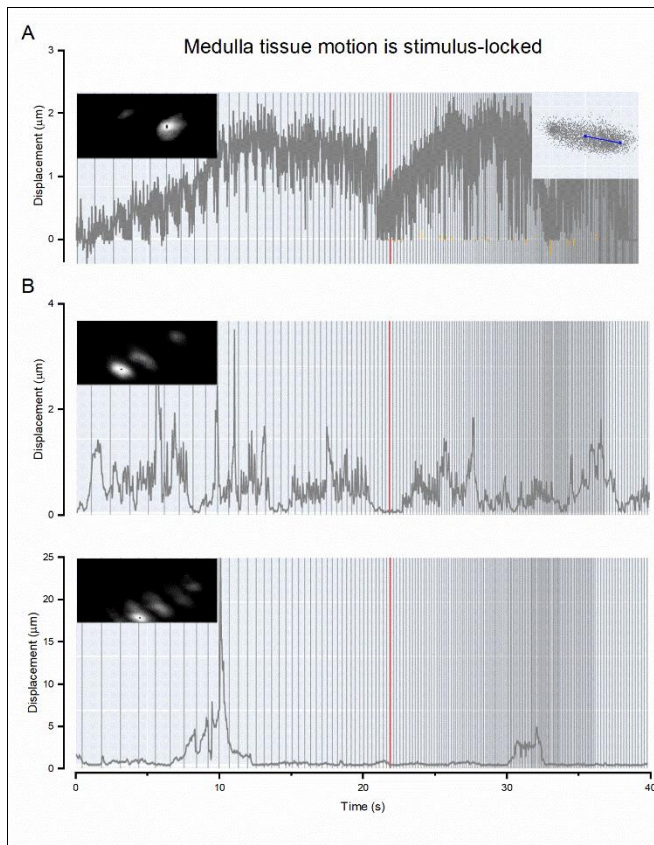

**Fig. S41. During 2-photon imaging, L2-terminals can show mechanical stimulus-synchronized jitter.** We used a stabilization algorithm to subtract this jitter from the fluorescence video recordings if it was deemed too large.

(A) A L2-terminal (ROI; region of interest) displacement during 85 fps imaging. In the inset, the L2-terminal's position is projected in the principle direction (blue line). Given the regularity and size of these small movements ( $\ll 1 \mu\text{m}$ ), they likely resulted from the photoreceptor microsaccades bouncing the optic lobes in a stimulus-synchronized manner. Similar optic-lobe-displacement dynamics were seen during the X-ray imaging (see, *e.g.*, **fig. S3**) (B) Two examples of larger mechanical displacements of the medulla L2-neuron terminals, obtained with low ( $\sim 20$  Hz) sampling rates (20 fps). The larger movements ( $> 1 \mu\text{m}$ ) are likely caused by intraocular muscle activity (6) that can move the retina in slow bursts. The smaller movements ( $\ll 1 \mu\text{m}$ ) superimposed on the bursts are likely caused by the stimulus-synchronized photoreceptor microsaccades

moving the retinal tissue. The three images depict the studied ROI pixels' standard deviation; *i.e.*, showing how the L2-terminal physically moved during the dynamically narrowing bar grating stimulation (**fig. S35**). The red vertical lines in **A** and **B** indicates GCamp6f resolvability limit, as obtained from separate flash-stimulation tests.

Furthermore, the larger ( $> 1 \mu\text{m}$ ) and more sporadic L2-terminal movements in the medulla, as seen in the analyses (**fig. S41B**), likely reflected intrinsic intra-ocular muscle activity (6).

The scripts to process and analyze the 2-photon images are downloadable from the repository: [https://github.com/JuusolaLab/Hyperacute\\_Stereopsis\\_paper/tree/main/AnalyzeL2Data](https://github.com/JuusolaLab/Hyperacute_Stereopsis_paper/tree/main/AnalyzeL2Data)

## IV. Multiscale modeling the adaptive optics and photoreceptor signaling

### Overview

This section describes the theoretical multiscale approaches to simulate the *Drosophila* ommatidium/compound eye optics and biophysically model how its R1-R7/8 photoreceptor cells sample spatiotemporal light information morphodynamically. It deals with three general cases:

- *Point-source light stimulation simulations.* We calculated the light power a *Drosophila* photoreceptor absorbs from the stimuli using the following two-step optical calculations: The first step consists of applying ray tracing for the propagation of the incoming light through the lens, which is followed by the application of the Fourier transform beam propagation method (FTBPM, (30)) for propagation through the crystal cone and the rhabdomere. In contrast to the earlier ommatidium wave-optical modeling (60, 78, 79), this approach gives more flexibility to analyze the optical structures' individual contributions and joint effect on morphodynamic light information sampling when R1-R7/8 photomechanics (3, 4) shift the rhabdomeres axially and sideways (4). Moreover, because each ommatidial R1-R7/8 rhabdomere has its unique size (4, 5) (**fig. S42**), the optical simulations were tailored to produce the specific dynamically absorbed light power inputs of their transductions. In the subsequent (biophysically tractable) four-parameter photon sampling model simulations (4, 31, 32), the light inputs were converted to refractory quantum bumps (QBs), which integrated each R1-R7/8's light-induced current (LIC). The photoreceptor voltage output simulations were then converted from their LICs (4, 31, 32) by using the Hodgkin-Huxley-type photoreceptor membrane model (62, 80) (the HH-model module (4, 31, 32)).

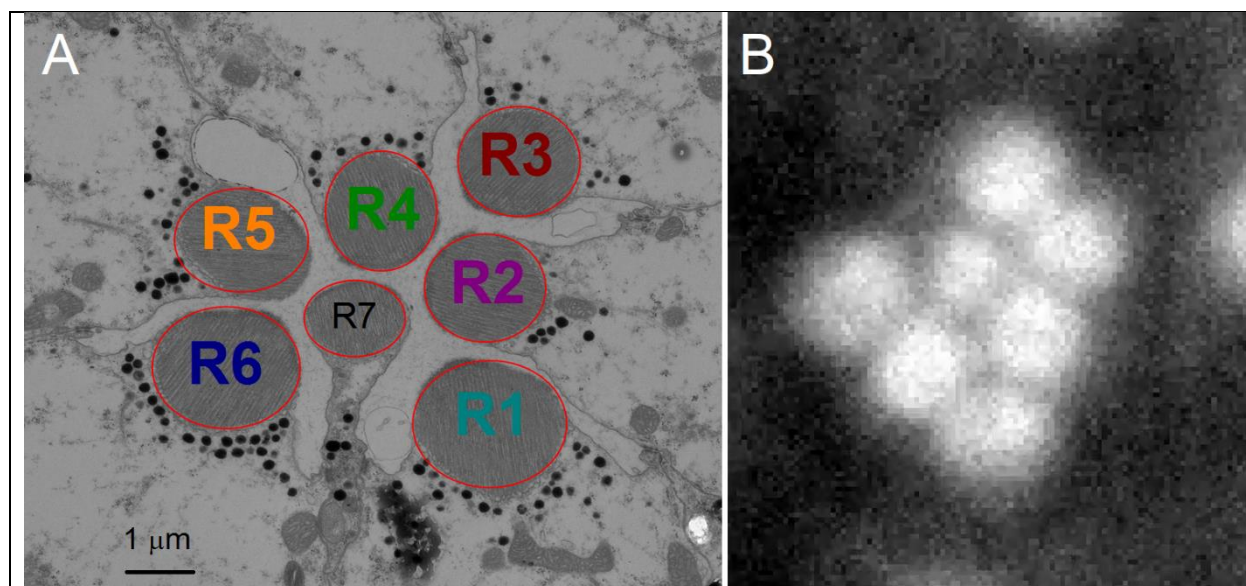

**Fig. S42. R1-R7/8 rhabdomere shapes vary from oblong to round and have different sizes.**

(A) Typical ommatidial R1-R7/8 rhabdomere pattern as seen in transverse section EM cut.

(B) Antidromically IR-illuminated ommatidial R1-R7/8 rhabdomeres as recorded during high-speed *in vivo* cornea neutralization imaging.

- *Complex stimulus pattern simulations.* R1-R7/8 responses to moving objects were simulated within their receptive fields (RF), estimated from point source simulations with

corresponding rhabdomere size and axial/lateral positions. Similar membrane voltage calculations were then conducted, as above, with the full photoreceptor model.

- *Stereo vision.* We simulated frontal stereo-information sampling using stereoscopic photoreceptor arrays in both the left and right eyes and their measured morphodynamic microsaccade dynamics (see **Section II.6.** and **fig. S21**, above). We propose a new theory/method based on neurophysiologically feasible cross-correlation computations to estimate object depth by the subsequent neural networks.

#### IV.1. Ray tracing through the *Drosophila* ommatidium lens

In this and the following two **Sections**, we define the *Drosophila* ommatidium optical structures and how they are parameterized for realistic photomechanical R1-R7/8 photoreceptor light sampling simulations, starting with the ommatidium lens.

To analyze the *Drosophila* optics for a light point source stimulus, we used a ray-tracing method (30) to simulate the average 16  $\mu\text{m}$  diameter ommatidium lens (**fig. S43**). Rays were cast to a regular square grid (31 x 31 rays) at the thick convex lens' front (outer) surface plain (16 x 16  $\mu\text{m}$ ) from a distant point source, 1 m away. The rays were then traced to the lens's back (inner) surface by calculating their intersection points with the outer and inner lens surfaces. Only rays hitting the front lens surface were considered. Finally, the intersection points with the outer plain were calculated. The results of the above served as an input to the FTBPM, discussed below.

The main lens parameters were obtained from the previous optical study (60): thickness, 8  $\mu\text{m}$ ; outer and inner surface curvatures, 11  $\mu\text{m}$  and -11  $\mu\text{m}$ , respectively; refractive index, 1.45; and the underlying crystal cone refractive index, 1.34.

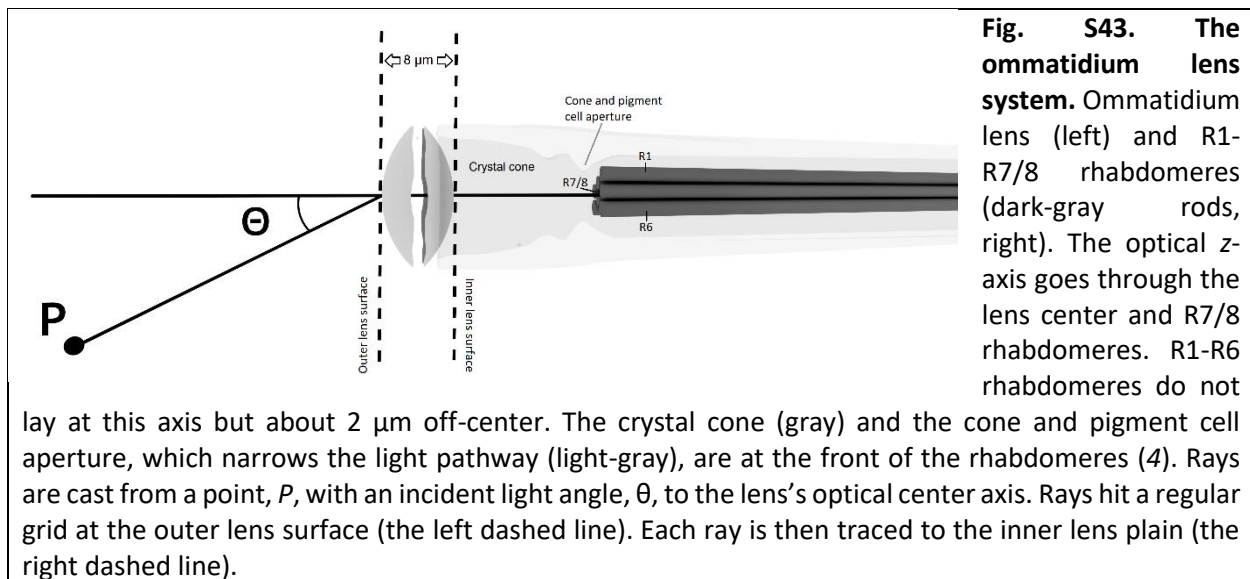

#### IV.2. Beam propagation through the *Drosophila* crystal cone and rhabdomere

Owing to a rhabdomere's complex lightwave properties, we used FT BPM (30) to simulate the field propagation through the crystal cone and the rhabdomere. The FT BPM is easily applicable and does not need analytical solutions to simulate the behavior of light in a rhabdomere's

complex optical structure. The method is quite suitable to deal with paraxial propagation in structures with low index contrasts.

For monochromatic light, the 3D scalar wave-equation, with an assumed time dependency  $e^{i\omega t}$ , is:

$$\left(\partial_{xx} + \partial_{yy} + \partial_{zz} + k_0^2 n^2(\mathbf{r})\right) E_\omega(\mathbf{r}) = 0, \quad \mathbf{r} = (x, y, z) \quad (14)$$

with  $\omega$  the angular frequency,  $k_0 (= \omega/c = 2\pi/\lambda)$  the vacuum wavenumber,  $\lambda (= 450\text{nm})$  the wavelength and  $E_\omega(\mathbf{r})$  is the complex electrical field. The true electrical field is:

$$E(\mathbf{r}) = \text{real}\{E_\omega(\mathbf{r})e^{i\omega t}\} \quad (15)$$

When considering light, which mostly propagates at small angles with, say, the positive  $z$ -axis (**fig. S44A**), we can use the slowly varying envelope (SVE) approximation (SVEA), with SVE  $\Psi$ :

$$E(\mathbf{r}) = \Psi(\mathbf{r})e^{-ik_0 n_0 z} \quad (16)$$

as explained next. The  $n_0$  is a constant defined as  $n_0 = \frac{n_{max} + n_{min}}{2}$ . For the rhabdomere,  $n_{max}$ , its refractive index is 1.363, while  $n_{min}$ , the refractive index around the rhabdomere is 1.34. Crystal cone was estimated to be homogeneous material (60) with index  $n_0 = 1.34$ , which was used in corresponding region. For the SVEA to accurate, the difference between  $n_{max}$  and  $n_{min}$  needs to be small. As this does not hold for the lens region, the ray-tracing method was used instead of the FT BMP.

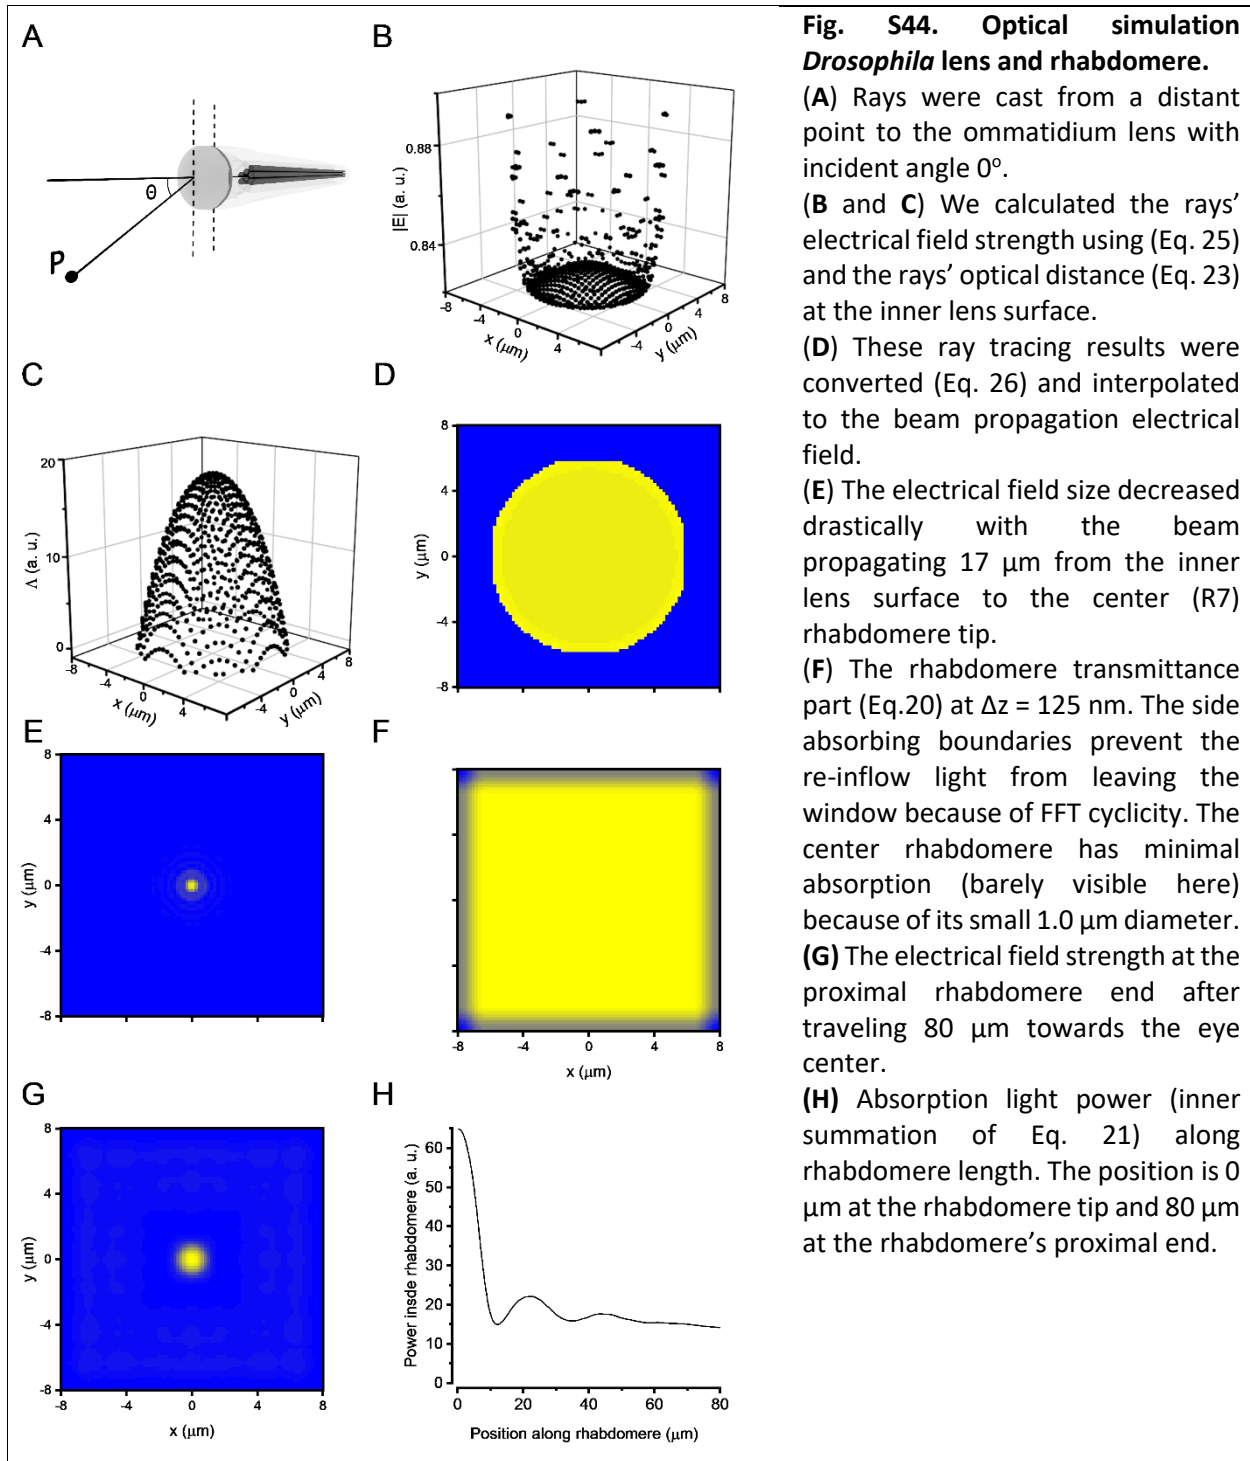

Substituting Eq.16 to Eq.14 leads to an expression:

$$(\partial_{zz} + ia\partial_z + Q)\Psi(\mathbf{r}) = 0 \quad (17)$$

$$a = 2k_0 n_0, \quad Q = Q_1 + Q_2, \quad Q_1 = \partial\partial_x + \partial\partial_y, \quad Q_2 = k_0^2(n^2(\mathbf{r}) - n_0^2)$$

It can be shown that for paraxial propagation in low contrast structures, one may neglect the operator  $\partial_{zz}$  in the above (30) leading, assuming sufficiently small step sizes  $\Delta z (> 0)$ , to the following solution to Eq. 17:

$$\Psi(x, y, z + \Delta z) \approx e^{\frac{iQ_2\Delta z}{a}} e^{\frac{iQ_1\Delta z}{a}} \Psi(x, y, z) \quad (18)$$

The requirement of small  $\Delta z$  values stem from the fact that the exponential operators in Eq. 18, with non-commuting operators  $Q_1$  and  $Q_2$  are applied in succession.

For a practical implementation of Eq. 18, a discretization of the SVE  $\Psi$  is required, for which we introduce the matrix  $\mathbf{M}(z)$ , containing the field values on a regular grid in the  $x$ - $y$  plane. The first step - the application of the operator  $\exp(iQ_1\Delta z/a)$  - can now be written as

$$\mathbf{M}_1(z_0 + \Delta z) = e^{iQ_1\Delta z/a} \mathbf{M}(z_0), \quad (19)$$

with  $\mathbf{M}_1$  an intermediate result. It can be performed most efficiently in Fourier space, owing to the presence of second-order differential operators, as follows:

1.  $F(\mathbf{M}(z_0)) = \tilde{\mathbf{M}}(z_0)$ , Fourier transform, the elements of  $\tilde{\mathbf{M}}$  correspond to certain values for the wave vector along  $x$  and  $y$ , denoted by  $k_x$  and  $k_y$ .
2. Multiply each of the elements of  $\tilde{\mathbf{M}}$  with the appropriate phase factor,  $e^{i(k_z - k_0 n_0)\Delta z}$ , with  $k_z \approx \sqrt{k_0^2 n_0^2 - k_x^2 - k_y^2}$ ; the latter follows from simple manipulations using  $k_z \approx k_0 n_0$ , owing to the paraxial approximation. We note that higher  $k_x$  and  $k_y$  values may correspond to imaginary values for  $k_z$ . To prevent unphysical field blow-up, one should always choose  $\text{Im}(k_z) > 0$  to attain damping (of the high spatial frequency components).
3. Back transform to the desired intermediate result:  $\mathbf{M}_1(z_0 + \Delta z) = F^{-1}(\tilde{\mathbf{M}}_1(z_0 + \Delta z))$ .

A consequence of the above procedure is that light running out of the computational window is re-entering at the other side, owing to the Fourier window periodicity. To that end, small absorbing layers were applied, corresponding to a small imaginary part of the refractive index, in stripes at the boundary. Its magnitude was slowly increasing from zero to some suitable value at the boundary to prevent back-reflection. The latter absorption was made effective via the second operator in Eq. 18, as explained next.

The second step of the FTBPM can be written as

$$\mathbf{M}(z_0 + \Delta z) = e^{iQ_2\Delta z/a} \mathbf{M}_1(z_0 + \Delta z), \quad (20)$$

with a multiplication of all field components in real space with a corresponding factor, depending on  $x$  and  $y$ ,  $\exp(Q_2\Delta z/a)$ , which can be applied straightforwardly. It is noted that absorption is introduced via an imaginary part of the index, say,  $n(x, y) = n'(x, y) + in''(x, y)$ , leading to  $\text{Im}(Q_2\Delta z/a) \approx k_0 n'' \Delta z$ , with  $n'' > 0$  corresponding to absorption and an absorption coefficient given by  $\kappa = 2k_0 n''$ . The factor of 2 is because  $\kappa$  refers to power decay. It is further noted that

step indices, as at the boundaries of rhabdomeres, are smoothed in FTBPM to prevent unphysical scattering at the transitions, which may occur in particular if the structure is varying along  $z$ . The smoothing term  $\frac{1}{(\frac{r}{a_r})^m}$  was applied to both exponent functions in Eq. 20; where  $r$  is the distance from the rhabdomere center,  $a_r$  is the rhabdomere radius, and  $m$  is a constant defining the slope of the smoothing (**fig. S44F-G**).

In the case of the crystal cone, its constitutive material was considered homogenous ( $Q_2 = 0$  and  $\kappa = 0$ ). Thus, Eq. 20 could be skipped and  $\Delta z$  in Eq. 19 set as large as possible. In the crystal cone (81) simulations,  $\Delta z = 17 \mu\text{m}$  (**fig. S44E**), if not specified otherwise, and its refractive index was 1.34. Owing to the cyclical nature of FFT with step regarding  $Q_1$ , we added an absorption layer around the x- and y-simulation boundaries, preventing the electrical field from traveling over them.

Light propagation in the  $\sim 80\text{-}\mu\text{m}$ -long R1-R6 (and R7+R8) rhabdomeres was simulated with Eq. 20, using 125 nm steps, which was a sufficiently small value (results remained virtually the same on lowering this value). The rhabdomere cross-section is a roundish disk, having  $0.005/\mu\text{m}$  absorbance (82, 83) and 1.34 refractive index around it (60). Importantly, each R1-R7/8 has its specific rhabdomere diameter (4), with R1's and R6's being  $1.8 \mu\text{m}$ ; R2-R5's  $1.6 \mu\text{m}$ ; and R7/R8's  $1 \mu\text{m}$ . From the rhabdomere simulations, total absorbed power was calculated by integrating power  $P(\mathbf{r}) = |\Psi(\mathbf{r})|^2$  over the whole rhabdomere (**fig. S44H**):

$$P_{abs} = \sum_{l=0}^{rhabdomere\ length} \sum_{rhabdomere\ area} |M(l\Delta z)|^2 (1 - e^{-\kappa\Delta z}) \quad (21)$$

Absorbed photon flux, which is possible to measure electrophysiologically from photoreceptors using bump calibration, is related to absorbed power:

$$P_p = \frac{P_{abs}}{E_p}, \quad (22)$$

where  $E_p = \frac{hc}{\lambda}$  is the single-photon energy at 450 nm.

From the ray-tracing results above, we calculated FT BPM simulation electrical field at the lens inner surface. The optical distances (**fig. S44B**) and field strengths (**fig. S44C**) were calculated from the ray-tracing simulations. The ray optical distance was calculated for the electrical field phase:

$$\Lambda(x', y') = \sum_i s_i n_i, \quad (23)$$

where each distance the rays traveled  $s_i$  was multiplied by the material's refractive index.  $x'$  and  $y'$  are the ray x- and y-positions, respectively, at the lens inner plain (**fig. S44B**).

The relative power represented by a certain ray (being a ray resulting from the ray-tracing calculations) is (approximately) inversely proportional to the area it represents in the plane perpendicular to that ray, which  $\Delta s_i^\perp$  denotes, with

$$\Delta s_l^\perp = \cos \theta \Delta s_l. \quad (24)$$

In the above,  $l$  is a label for the rays,  $\theta$  is the angle between the ray and the  $z$ -axis and  $\Delta s_l$  is  $1/4^{\text{th}}$  of the area enclosed by the 4 nearest rays at the inner plain (near the lens).

So, the considered ray's absolute value of the resulting relative field strength is given by

$$|E_l^{\text{ray}}| = \sqrt{\cos \theta / \Delta s_l}. \quad (25)$$

By evaluating the above and the corresponding phase, see Eq. 23, we know the field distribution as a result of the ray propagation. These serve as an input to calculate the input field for the FTBPM, introduced above  $\mathbf{M}(z = 0)$ , (**fig. S44D**):

$$\mathbf{M}(0) = \mathbf{M}_0 e^{i\Lambda(x,y)} \quad (26)$$

The field values, being the entries of  $\mathbf{M}_0$ , have been interpolated from  $|E_l^{\text{ray}}|$  and the corresponding phase  $\Lambda(x, y)$  from the corresponding ray phases (Eq. 23), using Matlab procedure 'scatteredInterpolant' (Mathworks, USA) in which  $512 \times 512$  points covered  $16 \times 16 \mu\text{m}$  lens area (**fig. S44B-D**).

### IV.3. Simulating R1-R7/8 photoreceptors' optical spatial properties (*static cases*)

R1-R7/8 photoreceptor rhabdomeres' spatial light-collecting properties were calculated by optical simulations, in which we varied the incident light angle between the point source and the lens optical axis, spanning  $\pm 20.4^\circ$  with  $1.7^\circ$  resolution; to be comparable to previous intracellular recordings (4). From the simulations with varying point source angles, a rhabdomere's total absorbed power,  $P_{abs}$  (Eq.21), was calculated in each simulation point. Then the incident light angles' total absorption curve was fitted with a Gaussian function to determine the tested rhabdomere's optical receptive field (RF) shape, its center, width at half-maximum (*static* half-width or acceptance angle,  $\Delta\rho_l^s$ ) and amplitude. Specifically, we examined two *static* scenarios of how a fixed rhabdomere position affects its optical RF shape; *i.e.*, the distribution of light rays it collects from the lens:

- (1) We analyzed a suite of RF simulations, where R1-R7/8 rhabdomeres were fixed at *different axial positions* away from the lens (**fig. S45**). The axial distance between the lens and the rhabdomere tip was increased by varying the crystal cone thickness (the distance between the lens's inner surface and the outer rhabdomere tip).
- (2) We analyzed a suite of RF simulations where R1-R7/8 rhabdomeres were fixed at *different lateral positions* by increasing the radial distance between the lens center axis and the rhabdomere tip position (**fig. S46**).



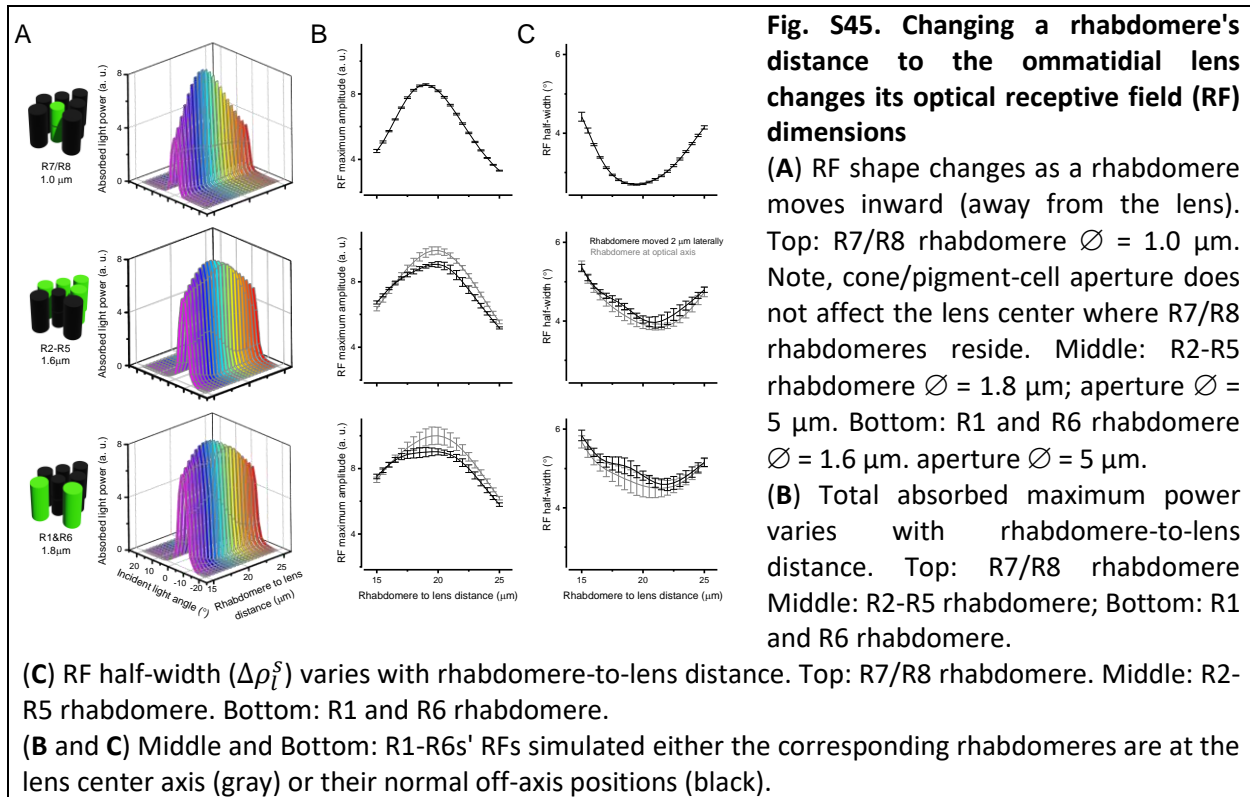

For both of these scenarios (**fig. S45** and **fig. S46**), we tested three specific rhabdomere diameters (4):  $1 \mu\text{m}$  R7/R8 (Top rows);  $1.6 \mu\text{m}$  R2-R5 (Middle); and  $1.8 \mu\text{m}$  R1 and R6 (Bottom); see also **Table S6**. Moreover, in the RF simulations, we considered the (static) *aperture effect of cone and pigment cells* (**fig. S47**) on the R1-R6's optical input (black traces, with the aperture; gray, without). These densely pigmented cells border the crystal cone opening just above the rhabdomeres, forming an aperture (4). The outer edges of R1-R6 rhabdomere tips either touch or are just outside this aperture.

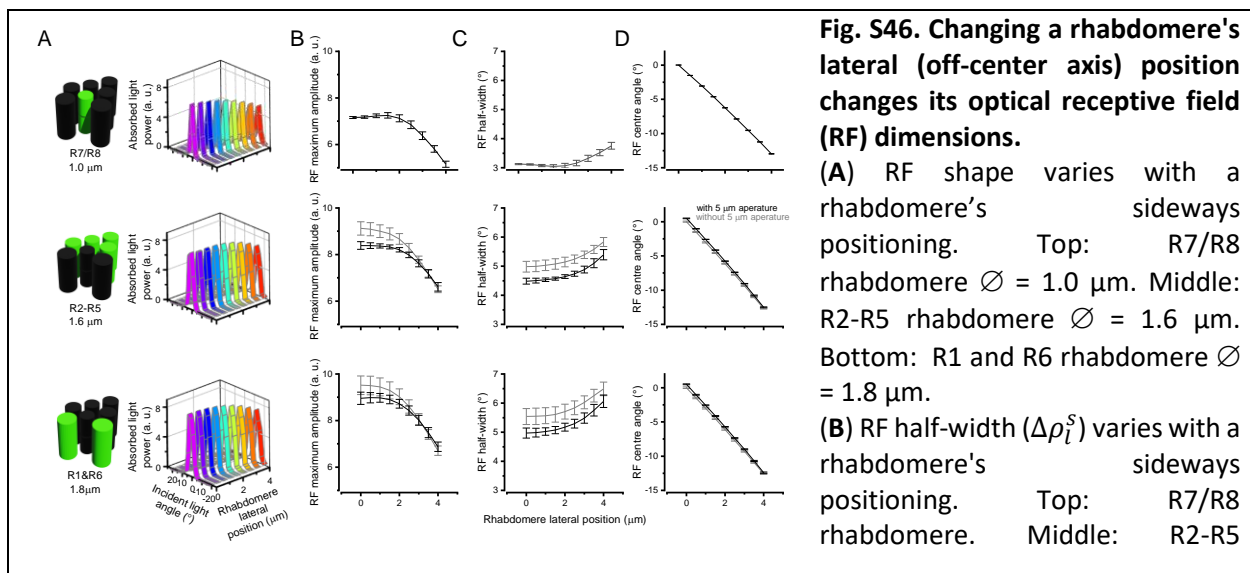

rhabdomere. Bottom: R1 and R6 rhabdomere.

(C) Total absorbed power max-amplitude varies with a rhabdomere's sideways positioning. Top: R7/R8 rhabdomere. Middle: R2-R5 rhabdomere. Bottom: R1 and R6 rhabdomere.

(D) Total absorbed power's center position varies with a rhabdomere's sideways positioning. Top: R7/R8 rhabdomere. Middle: R2-R5 rhabdomere. Bottom: R1 and R6 rhabdomere.

(B-D), Middle and Bottom rows: with  $\varnothing$  5  $\mu\text{m}$  cone/pigment-cell aperture (black traces) and without it (gray).

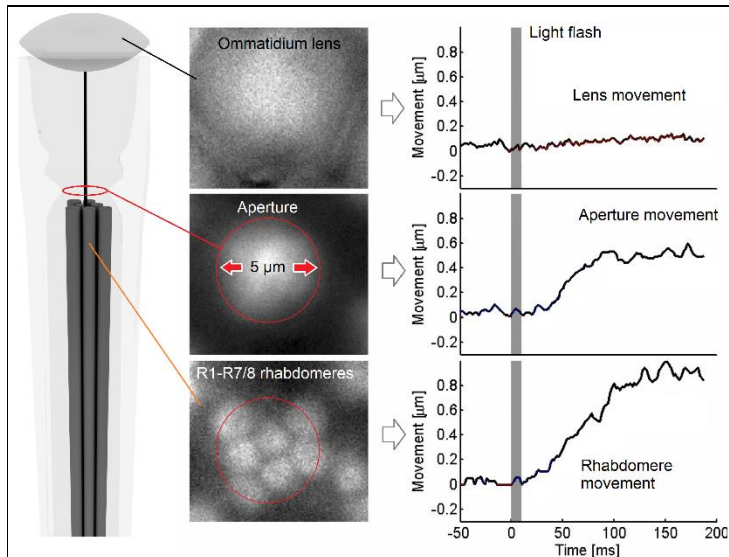

**Fig. S47. Ommatidial cone and pigment cell aperture – located between the crystal cone and the rhabdomere tips - shapes the light input to R1-R6 rhabdomeres.** The R1-R6 rhabdomere adherens-junctions connect to the cone cells (84). Therefore, during a photoreceptor microsaccade, as the rhabdomeres contract photomechanically, the aperture drags behind, moving about half as much sideways as the rhabdomeres. We call this delayed aperture movement the "swing effect" (4). These local structural photomechanical movements to green flashes were measured using the IR-

cornea-neutralization method (see Section II.8.ii, above) while raising and lowering a fly underneath the microscope objective with piezo-steps. Thereby, we could change the focus from the lens surface (above) to the cone and pigment cell aperture (middle) to the rhabdomeres (below) while light-activating the photoreceptors. Notice that – similar to X-ray imaging (fig. S3E) – the ommatidium lens remains stationary throughout the experiment.

The aperture was simulated as a 5  $\mu\text{m}$  diameter round opening, estimated from the light microscopy images (fig. S47) (4). Its thickness (5) was 2  $\mu\text{m}$  with 2.8 % total transmittance. In the previous wave-optical modeling studies (60, 78, 79), a different type of aperture, which tightly surrounds the rhabdomere with the same diameter, inadvertently arises from the mode simulation equations. But to our knowledge, the real cone and pigment cell aperture effect on a rhabdomere's optical receptive field shape had not been considered before.

**fig. S45** shows how changing the rhabdomere-to-lens distance (fig. S45A) changes the optical RF shape (fig. S45B-C). The simulations indicated that  $\Delta\rho_l^S$ , a rhabdomere's optical acceptance angle (RF half-width; fig. S45B), is at its narrowest at  $\sim 21$   $\mu\text{m}$  from the lens inner surface. At this point, the rhabdomere's light absorption power reaches its maximum (fig. S45C) for all the three simulated rhabdomere diameters. Note that during *in vivo* light stimulation, as the rhabdomeres contract, their axial component moves their tips  $\sim 2$   $\mu\text{m}$  away from the lens (4), which is just a fraction of the total range (10  $\mu\text{m}$ ) simulated here.

Seven rhabdomere tips (with R7/R8 counted as one) make the characteristic lopsided pattern behind the ommatidium lens. Naturally, with R1-R6 photoreceptors positioned off-center, the lens

center optical axis never passes through their rhabdomeres. **fig. S46** shows how changes in a rhabdomere's lateral position, away from the lens optical center axis, change its optical RF shape. This offset causes the optical RF centers to tilt  $3^\circ/\mu\text{m}$  (**fig. S46D**) in all the simulated rhabdomeres (of different diameters). The RF tilts to the opposite way of the offset-direction because the ommatidium lens inverts the rays. As the offset becomes larger, the optical RF acceptance angle ( $\Delta\rho_l$ ) broadens and the maximal absorbed power reduces. This is because the lens obscures some fraction of the light that enters with large angles (**fig. S46B-C**). To establish how the cone-pigment cell aperture shapes R1-R6 rhabdomeres' RFs, we simulated their light input with and without the  $5\ \mu\text{m}$  cone-pigment cell aperture in front of them. In all tested conditions, the aperture narrowed R1-R6 rhabdomeres' RFs in respect to the corresponding simulations without it.

#### IV.4. Generating light current

Light-induced current (LIC) responses were simulated from the absorbed photon flux,  $P_p$  (Eq. 22), using a four-parameter stochastic photon sampling model (**fig. S48**), a mathematical representation of phototransduction in microvilli (32). It closely reproduces the real *in vivo* sampling/integration dynamics, generating realistic simulations (32). For a given light stimulus, the model converts the successfully absorbed photons to quantum bumps (QBs) and integrates them to a LIC, as set by (i) the number of a *Drosophila* photoreceptor's photon sampling units (**fig. S48B**, 30,000 microvilli in an R1-R6), (ii) the microvilli refractoriness distribution (**fig. S48H**), (iii) the QB latency distribution (**fig. S48F**) and (iv) the adapting QB waveform (**fig. S48E**). Because  $P_p$  was not directly related to the point source power, we chose the maximal absorbed photon flux, based on intracellular recordings (4), and  $P_p$  was scaled to this. We used the established QB latency (**fig. S48F**) and refractory Gamma distributions (**fig. S48H**) (32) at  $20^\circ\text{C}$ . Gamma distribution contains  $n$  and  $\tau$  parameters:

$$\Gamma(t; n, \tau) = \frac{1}{n!\tau} \left(\frac{t}{\tau}\right)^n e^{-\frac{t}{\tau}} \quad (27)$$

Temperature affects (66) much the latency ( $Q_{10} = 3.4$ ) and refractory distribution half-widths, and thus the refractory distribution  $\tau$  parameter in the simulations. To compare the simulations to the typical recordings (4) at  $25^\circ\text{C}$ , which is *Drosophila*'s preferred temperature (4), the simulations were  $Q_{10}$ -scaled (4, 31, 32) when needed.

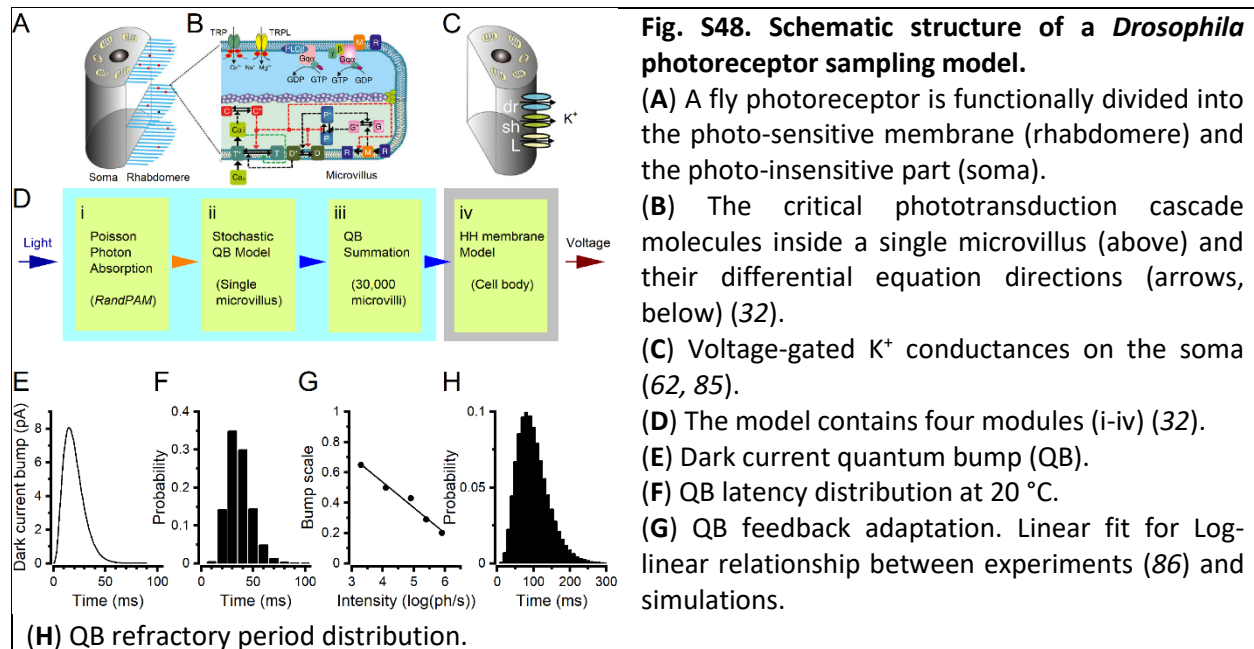

An average dark-adapted LIC QB waveform (**fig. S48E**) was modeled as a Gamma function (32, 49, 66, 87). Light-adaptation (negative feedback) was modeled by reducing the QB's amplitude and shortening its duration (49, 66). The QB duration is controlled by the Gamma-function's  $n$ -variable, which fastens the QB's rising phase, similar to light-adaptation (49, 66, 86). These QB adaptations were controlled by one parameter used as a multiplier to the QB amplitude and  $n$ . For short stimuli, we fitted the published LIC responses to 5 ms flash experiments (86) at 20 °C. We selected the multiplier by hand so that the macroscopic current was the same in the simulations as in the actual recordings. After fitting the individual data points, we could perform a linear-fit in a log-linear scale between the light intensity and the multiplier (**fig. S48G**). For dynamic simulations, the total photon flux for calculating the QB multiplier from the fit was obtained as the sum of absorbed photons between the start of simulations and the QB generation time point, using a 5 ms time-bin to match the measured QB latency data (86). The QBs were appropriately light-adapted by a controlled pre-simulation photon exposure. This procedure ensured that the QB light-adaptation dynamics and range followed physiologically accurately the simulations' light intensity modulation (photon flux changes). The maximal photon flux was set to  $11.1 \times 10^6$  ph/s.

#### IV.5. Light current to voltage response conversion

The macroscopic LIC response was converted to a voltage response using the *Drosophila* photoreceptor HH-membrane model (**fig. S48C**) (62, 80, 85). The model consists of several ion channels: the two LIC-channels (*trp* and *trpl* – here, combined), in which conductance (86) was calculated by dividing the light current with the -80 mV driving voltage (in the voltage-clamp-configuration), three  $K^+$ -channels and two passive leak channels, which approximate the mean synaptic feedback effect (29, 62). The voltage responses were simulated with an improved HH-model, which could now directly compute light-induced conductances instead of using a global voltage-feedback as was done before (4, 31, 32). This modification simplified and expedited the simulations while producing similar results as the old model. We obtained the RF's peak voltage response from the voltage simulations while fitting the total RF shape with a Gaussian function. This procedure further gave us the RF half-width and peak position. The used parameter values

were the same as in the early *Drosophila* membrane HH-models (85), except that the total input-resistance was set to  $\sim 200 \text{ M}\Omega$ , which better approximates the more commonly recorded values (4, 62).

#### IV.6. Estimating R1-R7/8 voltage response RF half-width for *static* rhabdomere positions

An R1-R7/8 photoreceptor's *voltage output* receptive field (RF) half-widths (acceptance angles,  $\Delta\rho_v^s$ ) were estimated similar to their optical *light input* RF half-widths ( $\Delta\rho_l^s$ ), but now using the corresponding voltage simulations. The stochastic four-parameter-model generated realistic LIC responses to light flashes of 22,000 photons/s (maximum intensity at the RF peak (4)). We modeled R7/R8 rhabdomeres at the on-center (the ommatidium lens's optical axis) and R1-R6 rhabdomeres 2.0  $\mu\text{m}$  off-center, with their outer edges touching the cone-pigment cell aperture. We used 10 ms flashes, in which intensity was set by the corresponding relative intensity (based on optical simulations with varying incident light angles).

At the R1-R7/8 rhabdomeres' measured dark-resting positions, with respect to the ommatidium lens, their *static* voltage response RF half-widths ( $\Delta\rho_v^s$ ) were:  $4.6^\circ \pm 0.2$  for 1.0  $\mu\text{m}$  diameter R7/R8 rhabdomere,  $6.4^\circ \pm 0.4$  for 1.6  $\mu\text{m}$  diameter R2-R5 rhabdomeres and  $7.1^\circ \pm 0.4$  for 1.8  $\mu\text{m}$  diameter R1 and R6 rhabdomeres, respectively (**fig. S49**). These values were predictably larger than their corresponding optical absorption power RF half-widths ( $\Delta\rho_l^s$ ):  $3.12^\circ \pm 0.02$ ,  $4.5^\circ \pm 0.1$  and  $5.0^\circ \pm 0.1$  (**Table S6**), respectively. These differences result from the compressive nonlinearities in the transformation from photon absorptions to voltage responses, such as slow QB-waveform dynamics and membrane conductances (32, 49, 85), which grant higher gain to weaker light changes, fattening the RFs' midriff and tails.

In the actual electrophysiological voltage response recordings (during a relative dark adaption) (4), the estimated average *dynamic* wild-type R1-R6 photoreceptors' RF half-width ( $\Delta\rho_v^d$ ) was even wider:  $9.65^\circ \pm 1.06$ , being about twice the simulated *static* optical RF half-widths ( $\Delta\rho_l^s$ ). The differences between the simulated and recorded voltage response RFs must arise from the *dynamic* processes that the *static* simulations lack. For example, the voltage RF simulations lacked the rhabdomere movements and slow QB adaptations, which do not fully recover (4) during the short experimental (500-1,000 ms) stimulus intervals. We know from the goniometric *in vivo* rhabdomere imaging (**Fig. 3** in the main paper, and **Section II.6**, above) that during *in vivo* electrophysiological recordings with repeated light-flash stimulation (4), the rhabdomeres and their RF centers must continuously shift in different positions in respect to the start state, widening the RF estimates. Moreover, during the experiments, there can be additional rhabdomere movements between the flash stimuli caused by spontaneous intraocular muscle activity (4, 6).

Interestingly, in the dark-adapted intracellular electrophysiological recordings, with the R1-R6 rhabdomeres being positioned about 2  $\mu\text{m}$  laterally off the ommatidium lens optical center axis (**fig. S42A**), the voltage RFs often showed skewness/asymmetry (4). This phenomenon is readily reproduced in the RF simulations when R1-R6 rhabdomere is positioned 2  $\mu\text{m}$  off the ommatidium lens' optical center axis (**fig. S49B-C**).

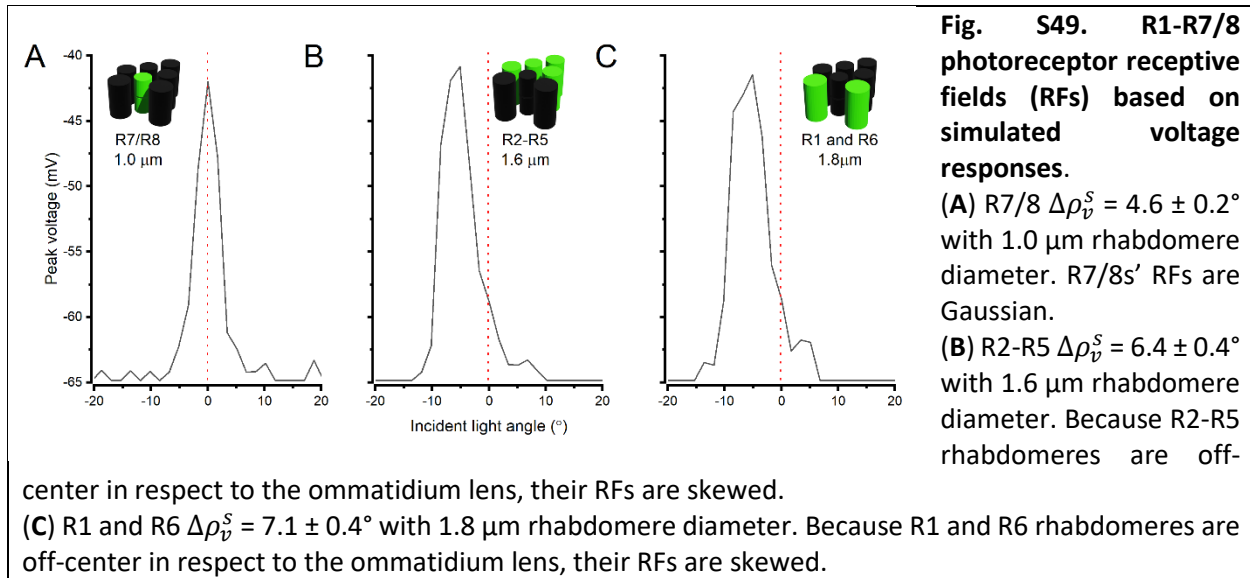

#### IV.7. Photomechanical rhabdomere movements

Our previous studies (3, 4) revealed the biphasic R1-R7/8 photoreceptor microsaccade photomechanics to a flash stimulus consisting of a fast contraction phase (rise) followed by a slower relaxation phase (decay). Here, we further measured the microsaccades' frequency response function (see **Section II.6.**, above). Moreover, we showed in **Section II.8.** (above) that in each ommatidium, R1-R7/8 rhabdomeres were structurally coupled - possibly by cross-connecting R1-R7/8 tip-links. Therefore, even a single photoreceptor light-activation made all its ommatidial sister photoreceptors contract/move in unison. Based on these results, the microsaccadic rhabdomere motion ( $x_d$ ) was modelled as a spring-dampener system, which closely reproduced the measured dynamics (**fig. S50**):

$$\frac{d^2 x_d}{dt^2} = \left(\frac{act(t)}{H_{act}}\right)^{n_{act}} + D_{coef} \left( D_{base}^{-1 * D_{exp} \frac{dx_d}{dt}} - 1 \right) - spring * x_d \quad (28)$$

$$spring = k_0 + k_{coef} \left(\frac{act(t)}{H_{spring}}\right)^{n_{spring}} \quad (29)$$

The microsaccadic movement system consisted of three forces: (i) the mechanical activation force, connected to the photoreceptors' photon absorptions; (ii) the dampener force, resisting the change in the resulting photomechanical movement; and (iii) the spring force, returning the rhabdomeres to their original positions. The equations lacked the mass term as the other terms accounted for this. The dynamic simulations used the Euler method to solve, numerically, the differential equation with 1 ms step. The various model parameters were fitted to match the recordings (**fig. S50**):

- Light activation  $act(t)$  connected the four-parameter-photoreceptor-model (see **Section IV.4.**, above) to the activation force. The activation  $act(t)$  was the absorbed photons leading to PIP<sub>2</sub> cleavage (3), following the four-parameter model's latency distribution dynamics. In each ommatidium, the light input was the sum of its seven (R7 and R8 fused) rhabdomeres' total absorption.  $H_{act}$  ( $= 9,000 \text{ ph}/\mu\text{m}^{1/2}$ ) controlled the rhabdomere movement amplitude when maximal photon flux was 900 ph/ms. The activation co-

operation parameter,  $n_{act}$ , was set to 2, which reproduced the rhabdomeres' photomechanical creep-up and creep-down behaviors seen in **fig. S50A**.

- The dampener resisted the change in the rhabdomere speed ( $dx_a/dt$ ). We set the dampener to have a maximal force with the positive movement speeds,  $D_{coef}=0.0001 \mu\text{m}/\text{ms}^2$ . The dampener base ( $D_{base}=2$ ) and the dampener exponent ( $D_{exp}=3,900 \mu\text{m}/\text{ms}$ ) defined the dampener's rectifier shape (its fast rise and slow decay). The dampener made the movement model unstable with brighter than 900 ph/ms light stimuli. Consistently, at such high light intensity levels, the photoreceptors' intracellular pupil mechanism and the ommatidial screening pigments actively filter off any brighter photon flux to maintain appropriate QB production rates, enabling maximum information flow while preventing saturation (4, 31).
- The spring constant,  $spring$ , depended on activation  $act(t)$ , increasing with light input. We set the spring constant without activation ( $k_0=0.0001/\text{ms}^2$ ) so that its decay was slow and the impulse response peaked in a reasonable time. The average microsaccade dynamics of characteristic recordings (measured from five wild-type photoreceptors) to brief positive and negative contrast changes (**fig. S50B-C**) were used to adjust the activation-dependent spring constant:  $H_{coef}=0.00115 \text{ 1}/\text{ms}^2$ ,  $H_{spring}=200 \text{ ph}/\text{ms}$  and  $n_{act}=1.3$ .

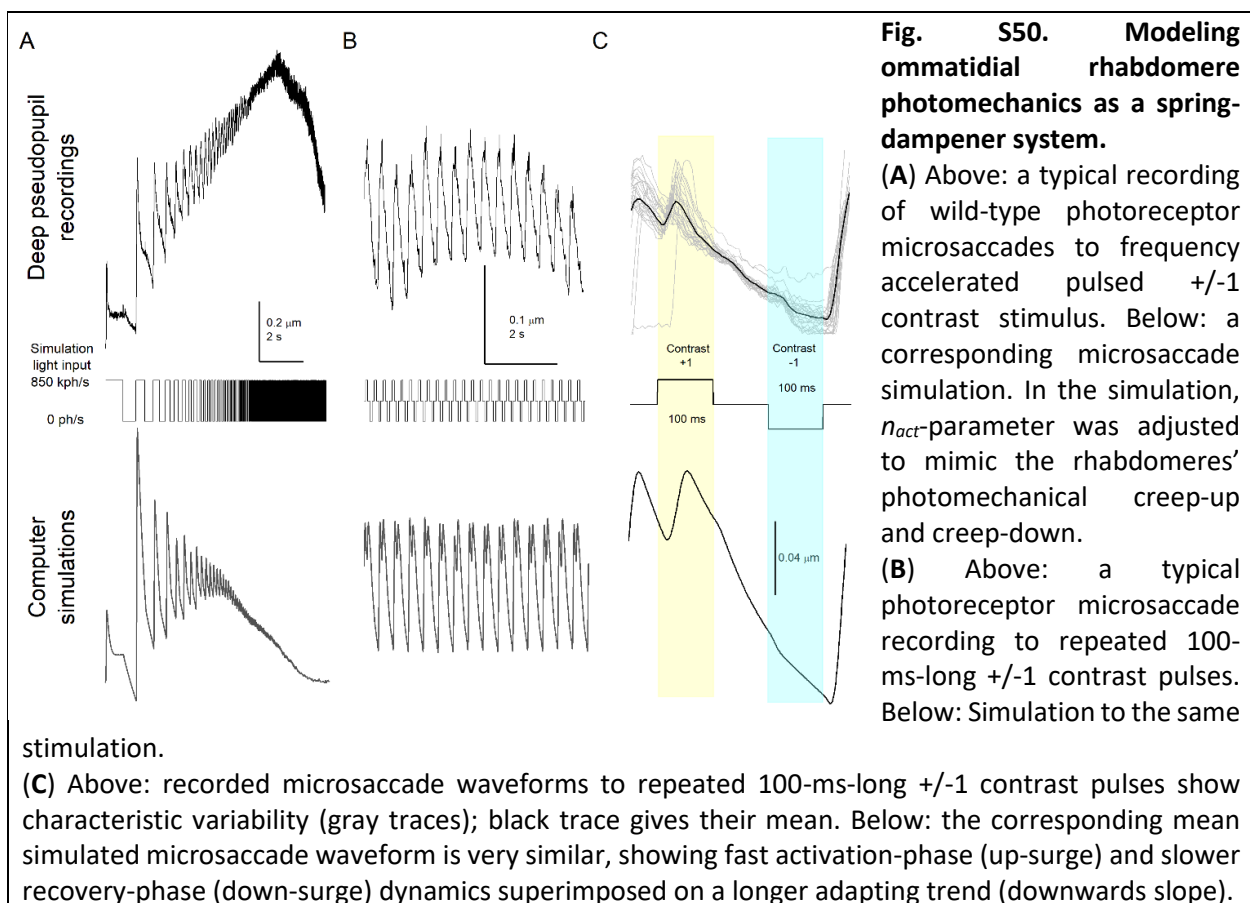

Only those rhabdomeres, which saw (*i.e.*, their RFs directly experienced) light changes, generated an intra-ommatidial R1-R7/8 movement locally, whereas in those ommatidia, which did not

experience (see) light changes, the rhabdomeres were still (*cf.* **Fig.1F-I** in the main paper; **fig. S29** to **S31** in **Section II.8.ii**, above; **Movie S10**).

#### **IV.8. Photoreceptor responses to spatiotemporal stimuli**

To study how *Drosophila* photoreceptors respond to moving stimuli, we simulated R1-R7/8 voltage responses to spatiotemporal visual objects crossing their receptive fields. For generating light inputs to the models, we ray-traced R1-R7/8 rhabdomere RFs - using their measured intraommatidial positions (**fig. S42A**) - onto a virtual surface; with the rays being cast from the center of the ommatidium lens (its outer face). The resulting RFs at the virtual surface (**fig. S51A**) were interpolated from the RF rays, divided by their surface areas. For generating the rhabdomeres' light inputs, we convolved their RFs fields with the stimulus image/video at the virtual surface; assuming that the screen is Lambertian (*i.e.*, with every angle having an equal light power output). The resulting light series was normalized by the maximum absorbed photon flux, and this outcome was then fed as the input to the combined four-parameter/HH-model to generate the simulated voltage response to the given stimulation (**fig. S51C-D**).

**fig. S51E-F** shows examples of two dots moving across two similar R5 photoreceptors' RFs (one located in the right eye and the other in the left eye), in which movement directions were along (in the same way; in the right eye) or against (in the opposite way; in the left eye) the given dot-movement direction. Thus, effectively, these two cases also simulate the corresponding R5 rhabdomere movements in the binocular left and right eye ommatidia; sampling light from the same small frontal area at the distance, where their RF fields overlap (near) perfectly.



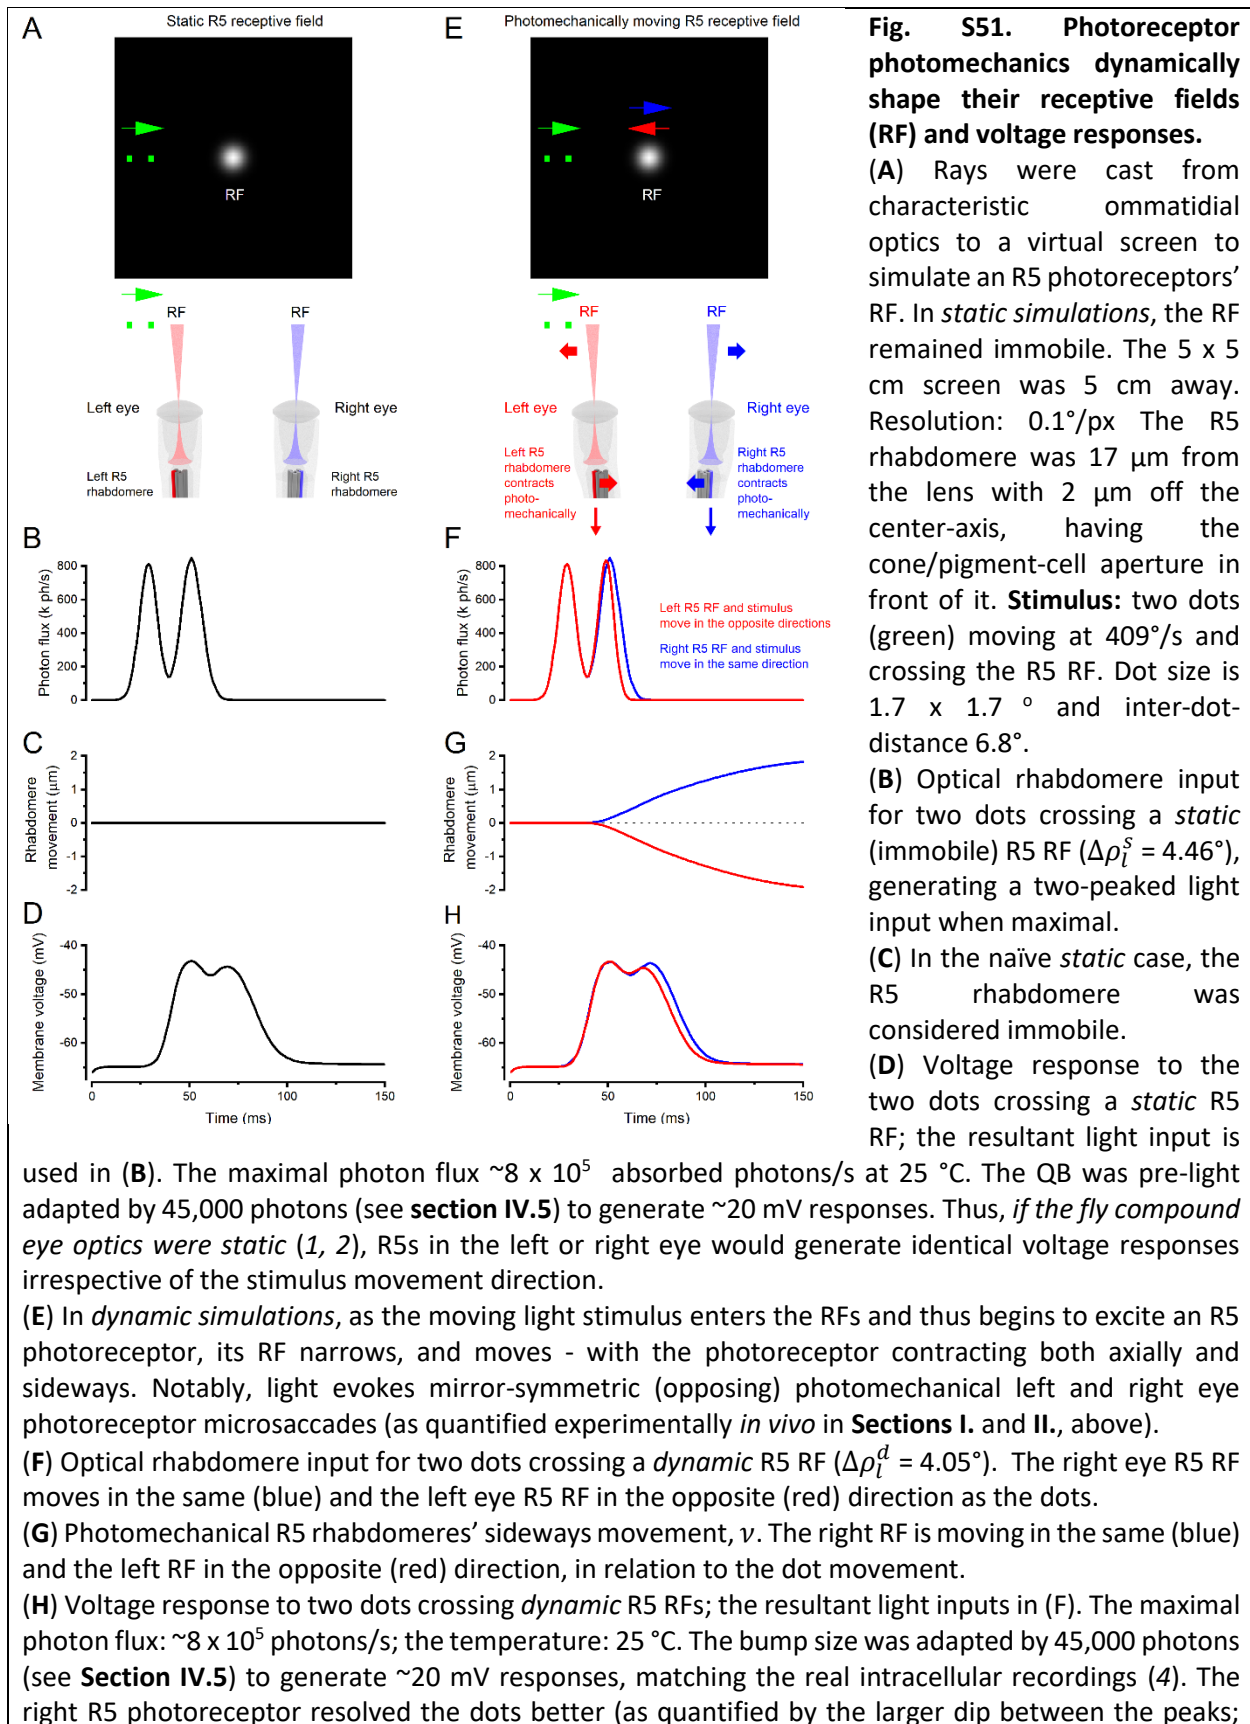

Rayleigh criterion (4)) because these moved in the same direction as its RF (blue), giving its phototransduction more time to separate them.

The moving R1-R7/8 rhabdomeres' Gaussian RFs were controlled by their intra-ommatidial photomechanical movements in the virtual screen simulations. How a rhabdomere's intra-ommatidial light capture and the subsequent microsaccade (of axial and lateral movements) affected and moved its RF (at the virtual screen with ommatidial lens inverting the directions) was estimated from the optical light-point-source simulation results (**Section II.6.**). In **fig. S46** (above), we showed that the receptive field center moved  $3^\circ/\mu\text{m}$ . A rhabdomere moved simultaneously inwards and sideways (4), with its distal tip's starting position being  $17 \mu\text{m}$  from the inner ommatidium lens surface. **Table S6** catalogs how the RFs of different sized rhabdomeres behaved, giving their dynamic light input acceptance angle ( $\Delta\rho_l^d$ ) estimates, when the rhabdomere-to-lens distance increased from  $17$  to  $19 \mu\text{m}$  (**fig. S45**).

**Table S6**

| Rhabdomere diameter                                                                    | R1-R7/8 rhabdomeres' optical light input RF half-widths (acceptance angles)                                                                     |                                                                                                                                     | R1-R7/8 rhabdomeres' optical light input RF maximum amplitude                                                  |                                                                                                       |
|----------------------------------------------------------------------------------------|-------------------------------------------------------------------------------------------------------------------------------------------------|-------------------------------------------------------------------------------------------------------------------------------------|----------------------------------------------------------------------------------------------------------------|-------------------------------------------------------------------------------------------------------|
|                                                                                        | <b>Hypothetical static case (<math>\Delta\rho_l^s</math>):</b><br>no R1-R7/8 photomechanics. Fixed $17 \mu\text{m}$ rhabdomere-to-lens distance | <b>Realistic dynamic case (<math>\Delta\rho_l^d</math>):</b><br>Rhabdomere-to-lens distance increases from $17$ to $19 \mu\text{m}$ | <b>Hypothetical static case:</b> no R1-R7/8 photomechanics. Fixed $17 \mu\text{m}$ rhabdomere-to-lens distance | <b>Realistic dynamic case:</b><br>Rhabdomere-to-lens distance increases from $17$ to $19 \mu\text{m}$ |
| <b>R7/8: <math>1 \mu\text{m}</math></b>                                                | <b><math>3.12^\circ</math></b>                                                                                                                  | <b><math>2.7^\circ</math>; RF half-width reduces by <math>-0.42^\circ</math></b>                                                    | <b><math>7.16</math> (a.u.)</b>                                                                                | <b><math>7.60</math>; collects more photons by <math>+1.4</math></b>                                  |
| <b>R2-R5: <math>1.6 \mu\text{m}^*</math></b>                                           | <b><math>4.48^\circ</math></b>                                                                                                                  | <b><math>4.05^\circ</math>; RF half-width reduces by <math>-0.43^\circ</math></b>                                                   | <b><math>8.39</math> (a.u.)</b>                                                                                | <b><math>9.75</math>; collects more photons by <math>+1.36</math></b>                                 |
| <b>R1 and R6: <math>1.8 \mu\text{m}^*</math></b>                                       | <b><math>4.99^\circ</math></b>                                                                                                                  | <b><math>4.67^\circ</math>; RF half-width reduces by <math>-0.32^\circ</math></b>                                                   | <b><math>8.96</math> (a.u.)</b>                                                                                | <b><math>9.90</math>; Collects more photons by <math>+0.94</math></b>                                 |
| <b>*<math>5 \mu\text{m}</math> aperture touching the rhabdomere tip's outside edge</b> |                                                                                                                                                 |                                                                                                                                     |                                                                                                                |                                                                                                       |

Notably, these are realistic but conservative *mean estimates for dark-adapted R1-R7/8 photoreceptors with round-tip cylindrical rhabdomeres*. In our previous study (4), we compared the R1-R6 photoreceptors' electrophysiologically measured angular sensitivity functions to their two-dot separation responses, as measured immediately one after the other from the same cells (4). For the highest acuity photoreceptor, we deduced analytically that to achieve its two-dot response resolution, its acceptance angle would need to narrow down to  $\leq 3.7^\circ$  dynamically; whereas for the most R1-R6s, their acceptance angles would need to contract to  $\sim 4-4.5^\circ$ . We attributed these  $\Delta\rho_l^d$ -differences to the natural variations in the individual R1-R6s rhabdomere diameters and their eye-location-dependent orientation in respect to the given stimuli – *i.e.*, whether the two dots crossed their *oblong rhabdomere tips* (**fig. S42**) along the long ( $\Rightarrow$  larger acceptance angle) or short

diameter ( $\Rightarrow$  smaller acceptance angle). Moreover, **Table S6** simulations do not include the RF narrowing by the intracellular pupil mechanism during light adaptation (79, 88, 89). Thus, the corresponding light-adapted acceptance angles should be smaller yet.

#### **IV.9. Neural superposition**

For neural superposition (**fig. S52A**), we simulated neighboring ommatidia on a virtual screen. A single ommatidium's RF pattern is shown in **fig. S52B**, with parameters taken from the optical simulations (**fig. S44 to S46**). Lens positions and the standard hexagonal lens patterns were calculated based on the known parameters (60, 78): 16  $\mu\text{m}$  distance between neighboring lenses (5),  $5^\circ$  angle between the lens centers (results from the eyes' hexagonal ommatidia tiling with  $4.5^\circ$  interommatidial angle). The R1-R7/8 rhabdomere pattern in the ommatidia was taken from high-resolution EM and live microscopy images (4). The rhabdomere center positions were measured, with R7/8 rhabdomeres expected to be on the lens optical center axis during dark-adaptation. For the best overlap in the neural superposition pattern, the distances from R7 were multiplied by 0.85 (**fig. S52C-D; Table S1**) (R1-R6 are 0.2  $\mu\text{m}$  closer to the center at the rhabdomere distal tip (5)). Because R1, R2, R3, R4, R5, and R6 rhabdomeres have different diameters (4) and are different distances away from the ommatidium lens center, the neural superposition pattern cannot align perfectly, as shown in **fig. S52C-D**. These results directly equate to Pick's (16) findings, which showed that photoreceptor optical angles vary between ommatidia, leading to imperfect neural superposition tiling. The slight discrepancies with photoreceptors' positions and photomechanical movements caused voltage responses in superpositional photoreceptors (**fig. S52E**) to be slightly misaligned and effectively increase the over-completeness of the photoreceptor matrix (4, 16).

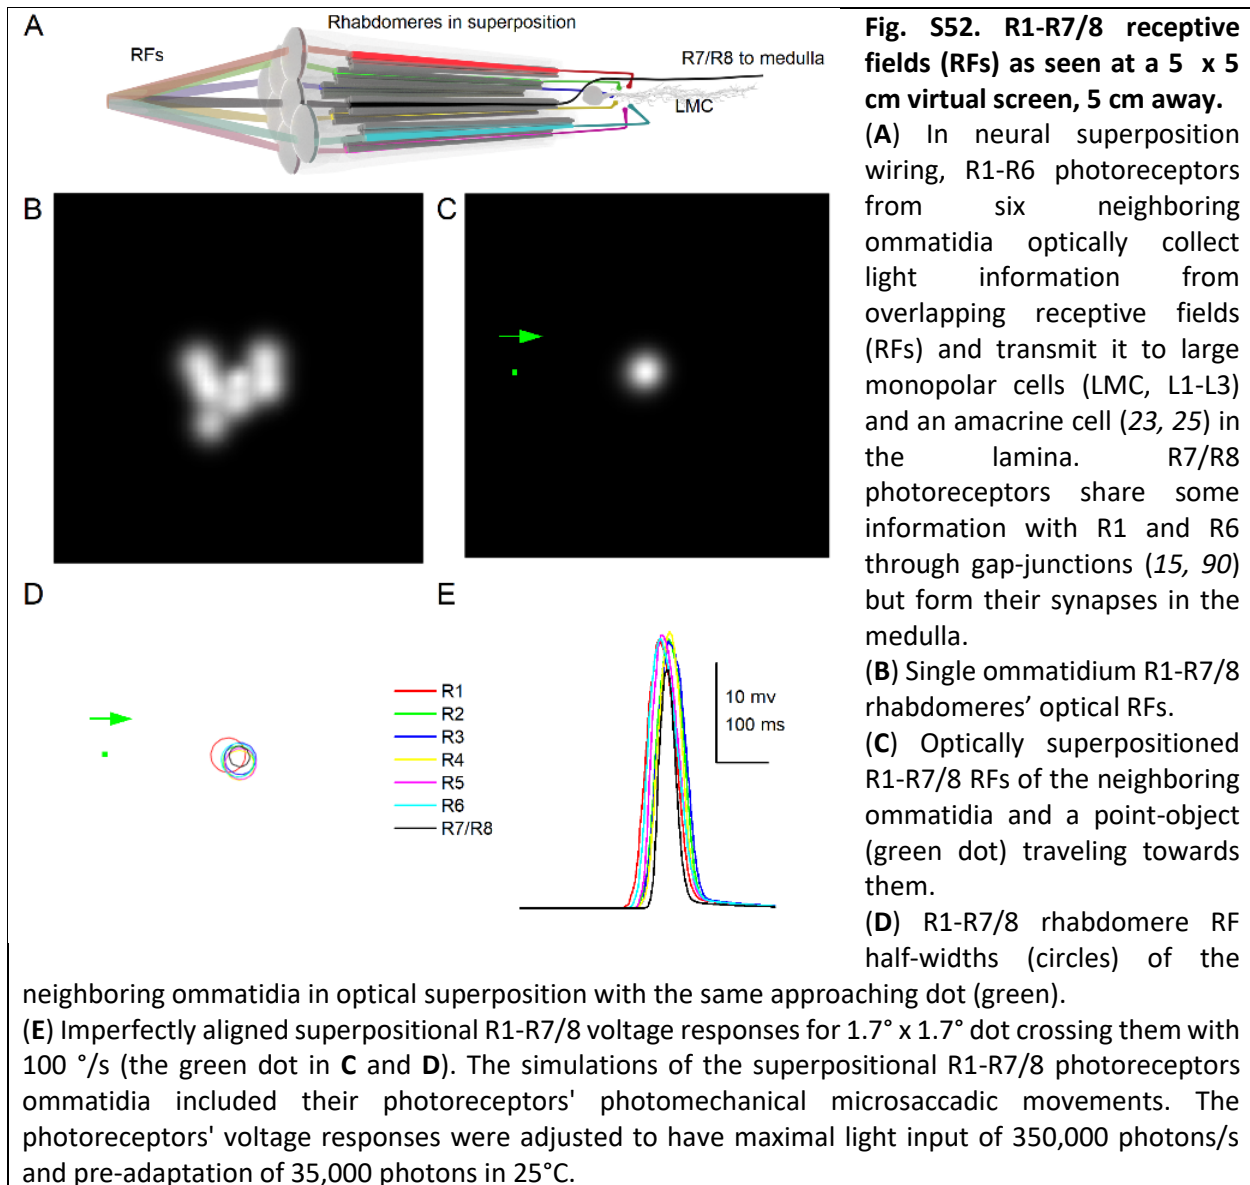

#### IV.10. New theory for mirror-symmetric microsaccadic sampling of dynamic stereo-information

We now extend the theoretical framework from simulating a single ommatidium's spatiotemporal sampling dynamics to simulating an ommatidia group's sampling dynamics within the binocular (stereo) eye regions. *Drosophila's* microsaccadic sampling of stereo-information was simulated using two  $4 \times 5$  ommatidia grids; representing its two eyes' frontal sampling matrixes at the fly head's central (antenna) level. For each ommatidium, its seven rhabdomeres' RFs (R7/R8 fused) were simulated on a virtual screen. The distance between the nearest left and right eye ommatidia is  $440 \mu\text{m}$  (inter-eye distance) and their lenses diverge  $2^\circ$ , as determined from the x-ray images (fig. S2B). Their rhabdomeres moved out- and downwards at a  $45^\circ$  angle, as determined by the goniometric measurements (fig. S23; Movie S4).

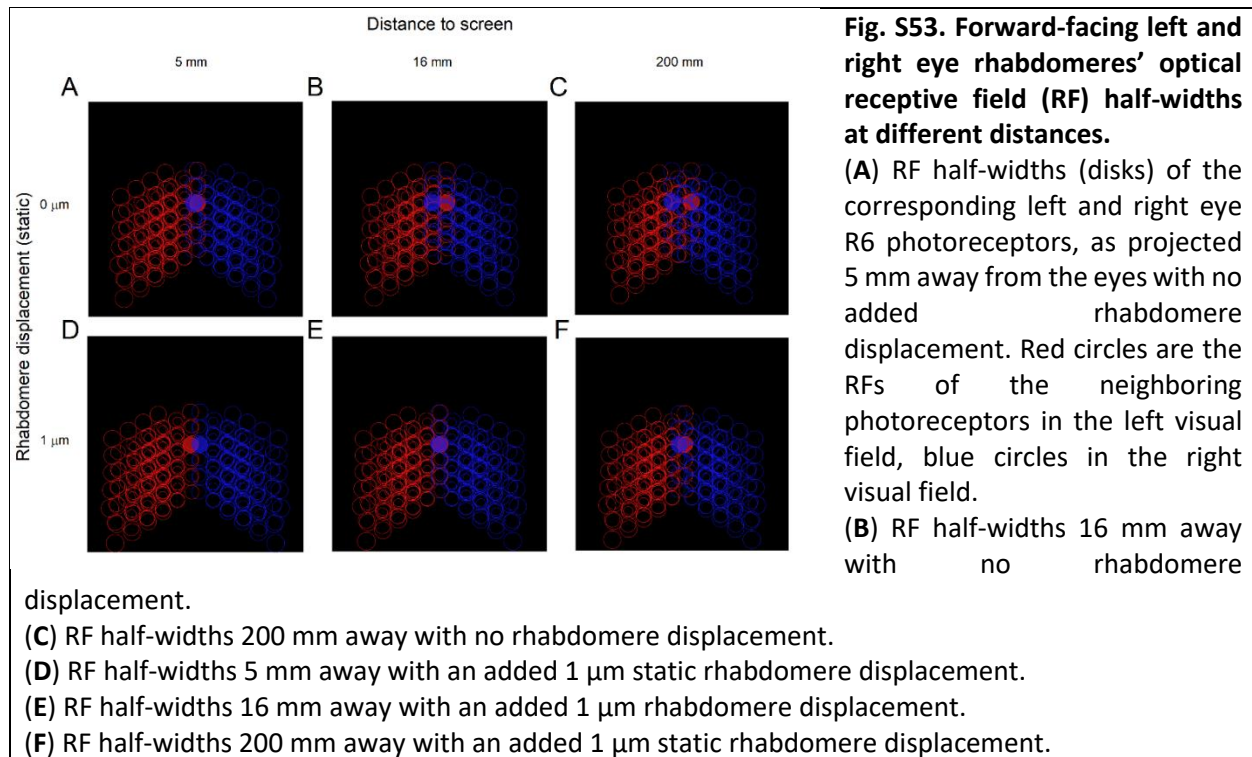

**fig. S53** shows the rhabdomeres RFs (half-widths) and their photomechanically induced shifts, as projected at different virtual screen depths. Maximally 2.5 photoreceptor rows ( $\sim 11.5^\circ$  binocular RF half-width overlap) are overlapping in stereo vision (**fig. S53C**). The overlap was over-complete, as multiple RFs tiled up around the same position. With 1  $\mu\text{m}$  movement, the overlap decreased to 1.5 rows (**fig. S53F**). As the virtual screen was brought closer, the overlap became smaller. The crossing point of rows changed from roughly 5 mm away at rest (**fig. S53A**) to 16 mm (**fig. S53E**), when all rhabdomeres had moved 1  $\mu\text{m}$  in  $45^\circ$  away direction. With dynamic stimulus (**Movie S9**), the degree of overlap changed over time, increasing the visual fields' over-complete tiling.

#### IV.11. Estimating distance using both eyes

Based upon its eyes' *static* (immobile) anatomical dimensions, *Drosophila*'s estimated horizontal stereo vision field is small, containing maximally photoreceptor 2.5 rows. A similar constraint also arises in other compound eyes with a small overlapping field of view, such as bees (91). The small stereo vision field will make the conventional *static* stereo parallax - the left and right eye image disparity - distance estimator have a low depth resolution and a short depth range.

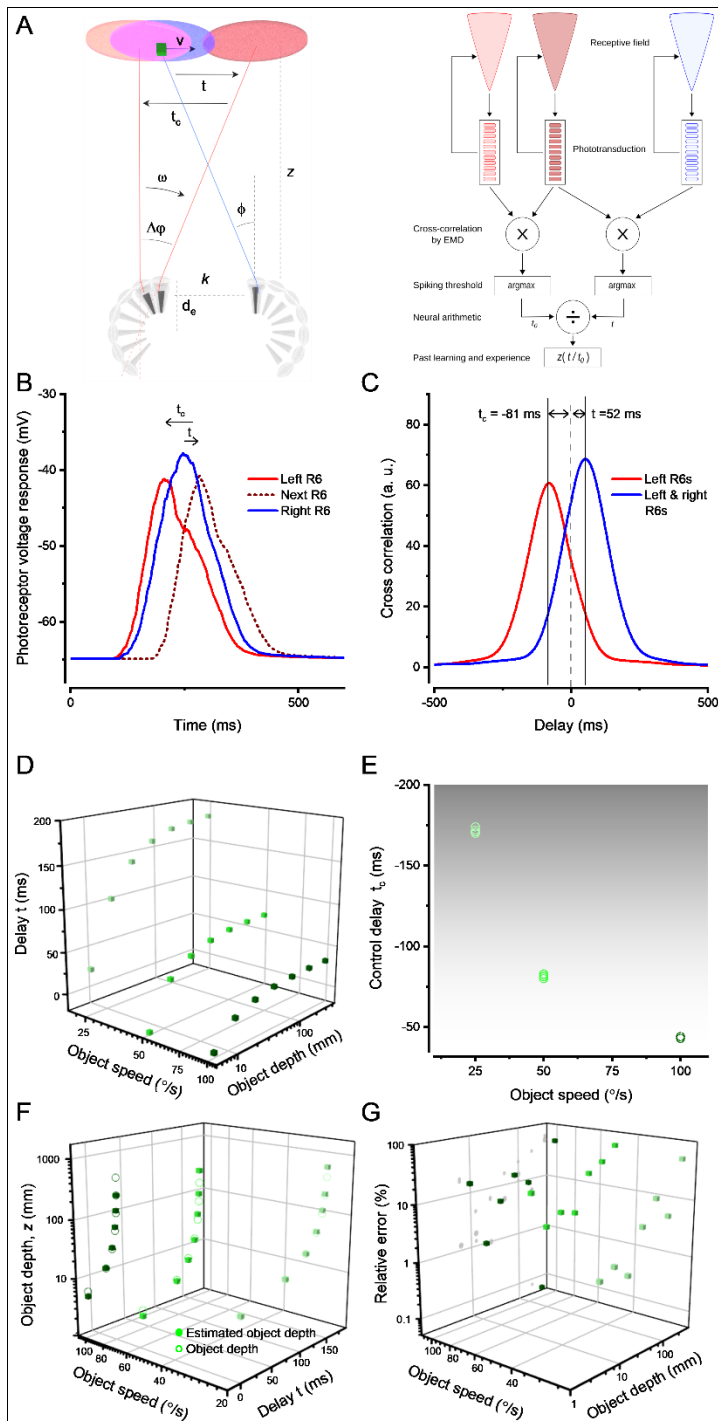

**Fig. S54. Object depth estimation from dynamic binocular R6-photoreceptor outputs.**

(A) Schematic of structural depth perception constraints in *Drosophila* compound eyes and the parameters and neural computations needed for calculating the object depth ( $z$ ) in (*dynamic*) stereovision. Red indicates the left-eye and blue the right-eye receptive fields (RFs) and sampling.

(B) Simulated voltage responses of three R6-photoreceptors at 25°C when a  $1.7^\circ \times 1.7^\circ$  object (a light-point) passes their overlapping RFs  $50^\circ/\text{s}$ , 25 mm away. These photoreceptors experienced maximal light input of 350,000 photons/s and were pre-adapted by 35,000 photons.

(C) Cross-correlations calculated from the same responses in **B**. The red correlation is between the two left-eye R6-photoreceptor responses in the neighboring ommatidia (this pixel-wise correlation withstands the transmission in the optically/neurally superpositioned neighboring cartridges; from the photoreceptors to the lobula plate H1-neurons (92)). The blue correlation is calculated over the binocularly-shared RFs (overlapping pixels); between the corresponding right- and left-eye R6-photoreceptor responses. Such binocular correlations likely happen in the retinotopically organized neural cartridges of the lobula optic lobe, where the location-specific ipsi- and contralateral photoreceptor information is pooled (see **Section V**, below). The time delays occur between the maximum correlations (vertical lines) and the object

crossing the left R6-photoreceptor's RF center (vertical dashed line). See **Movie S9** and **S10**.

(D) Simulated delays,  $t$ , between the corresponding left and right-eye R6-photoreceptors (with overlapping RFs) when varying the object ( $1.7^\circ \times 1.7^\circ$  light point) distance and speed. The screen resolution was  $0.1^\circ/\text{pixel}$  in all simulations.

(E) Corresponding changes in the control delay,  $t_c$ , when varying the object depth (7 different object depths taken from **D**) for the three different tested object speeds (25, 50, and  $100^\circ/\text{s}$ ). The control delay is not dependent on the object depth as all simulations with the same speed show little variance.

(F) Comparison between the real object depth (open circles) and the corresponding model estimated object depth (disks); calculated from the estimated delays using Eq. 35.

(G) The relative error in the model estimated object depth with respect to the real object depth. The error was calculated between (D) and (F).

Here, we suggest a new *dynamic* depth estimation method (**fig. S54**) based on an object moving in the stereo field. An animal perceives motion when an object moves in its visual field and/or when itself or its eyes move (self-motion). For diurnal insects, praying mantis has been shown to estimate the distance to a moving object (37, 93). The distance between the left and right eye causes a depth ( $z$ ) dependent delay between the corresponding left and right eye photoreceptor responses when their RFs collect light information from the same small visual area in space (**fig. S54A**). The time difference ( $t$ ), when an object moves with speed ( $v$ ) over a distance ( $s$ ) ( $s = vt$ ), can be estimated from the delay in the peak cross-correlation between the photoreceptor responses. From the geometry between the corresponding left and right eye R6 photoreceptors (**fig. S54A**), we have the following relationship:

$$\frac{k-s}{2z} = \tan(\phi) \quad (30)$$

, where  $k = 440 \mu\text{m}$  is the distance between the eyes and  $\phi$  is the photoreceptor convergence angle. With  $s = vt$  substitution, we obtain the object depth as:

$$z = \frac{k-vt}{2\tan(\phi)} \quad (31)$$

For determining the object speed, we used two neighboring photoreceptors (which also corresponds to neurally superimposed neighboring LMC pixels in the lamina sampling matrix (92)) in the left eye as inputs to a simplified elementary motion detection circuit. In this scheme, we presume that the inputs from the corresponding binocular photoreceptor RFs (of the ipsi- and contralateral eyes) are brought together and compared in the lobula, in which connectivity indicates such circuits (see **Section V**, below). We calculated the delay  $t_c$  between these photoreceptors using cross-correlation. Then the following equation is true:

$$\Delta\phi = \omega t_c \quad (32)$$

, where  $\Delta\phi$  is the interommatidial angle ( $4.5^\circ$ ), and  $\omega$  is the object's angular speed:

$$\omega = \frac{v}{d+d_e} \quad (33)$$

, where  $d_e$  is the eye radius. Thus, the object speed is

$$v = \frac{\Delta\phi(d+d_e)}{t_c} \quad (34)$$

By substituting the speed in Eq. 31, the object depth is

$$z = \frac{k-d_e\Delta\phi\frac{t}{t_c}}{2\tan\phi+\Delta\phi\frac{t}{t_c}} \quad (35)$$

The convergence angle,  $\phi$ , is dependent on rhabdomere movement (**fig. S53**). The movement amplitude is dependent on object speed ( $\Delta\phi/t_m$ ). When an object moves through the field, the photoreceptor convergence-angle gets smaller (**fig. S53**). The exponential function with negative exponent was found as the best fit for approaching the dependency:

$$\phi = \phi_0 \left( \frac{\Delta\phi}{t_m} \right)^{-\phi_t} \quad (36)$$

, where  $\phi_0$  is the starting photoreceptor converge angle ( $5.8^\circ$ ) and the speed-dependent exponent  $\phi_t$  is 0.26565. As the object moved faster through the receptive field, the rhabdomere had greater movement amplitude (given the same stimulus light strength). Thus, the convergence angle was smaller.

We simulated three ommatidia (*e.g.*, two in the left eye and one in the right eye) in the stereo vision field. We calculated the delays:  $t_c$  (or control delay) between two neighboring R6-photoreceptors in the left eye and  $t$  between the corresponding (and mirror-symmetrically aligned) R6-photoreceptors in the left and right eye (**fig. S54A**). **fig. S54B** shows an example of such R6 voltage responses for the three ommatidia, and **Fig. S53C** shows the cross-correlation curves based on **fig. S54B** data. The delays  $t_c$  and  $t$  are the delays with the maximal cross-correlations in respect to the left R6-photoreceptor's RF-center (zero time-point). **fig. S54D** shows how the delay  $t$  increases exponentially as a function of the object depth (the distance from the eyes). The  $t_c$ -delay, which mimics that seen in the classic elementary motion detectors (92, 94, 95), shortens as a function of the object speed (**fig. S54E**) with its slight variations coming from the noise (stochastic variations) generated by the QB summation in the four-parameter model. **fig. S54F** shows the estimated depth by Eq. 35 and **fig. S54G** shows the corresponding error.

Recordings from real neurons suggest that the depth estimation requires a change in the object's visual distance, as shown for the praying mantis (37). If the object distance did not change, the suggested depth neurons would operate like many neurons along the motion detection pathway, responding most strongly to some preferred motion-direction yet showing less clear speed- or intensity-dependency.

#### IV.12. Estimating *Drosophila*'s dynamic stereo vision range

Given that the *Drosophila* left and right eyes are  $\sim 440 \mu\text{m}$  apart, the corresponding binocular photoreceptor pairs' receptive fields (RFs) converge, move mirror-symmetrically and cross a certain distance in the front of the eyes, the accuracy of the dynamic stereoscopic depth estimation is limited. The absolute and relative depth error (**fig. S55A-B**) increased with the object distance because the angular differences become negligibly small far away. The relative error was in general  $>10\%$  when the distances were  $>10 \text{ cm}$ . The depth error can be explained by the hyperbolic shape (**fig. S54D**, Eq. 35) of delay ( $t$ ) combined with the phototransduction model's noise (the four-parameter model's stochastic variations in QB integration).

In **fig. S55C** and **D**, we tested a case where one eye's rhabdomeres were stationary (immobile). The monocular photomechanical movements led to a significant depth overestimation because the delay ( $t$ ) increased in these conditions. The object speed estimate became miss-calculated when one eye's photomechanical movements were stopped.



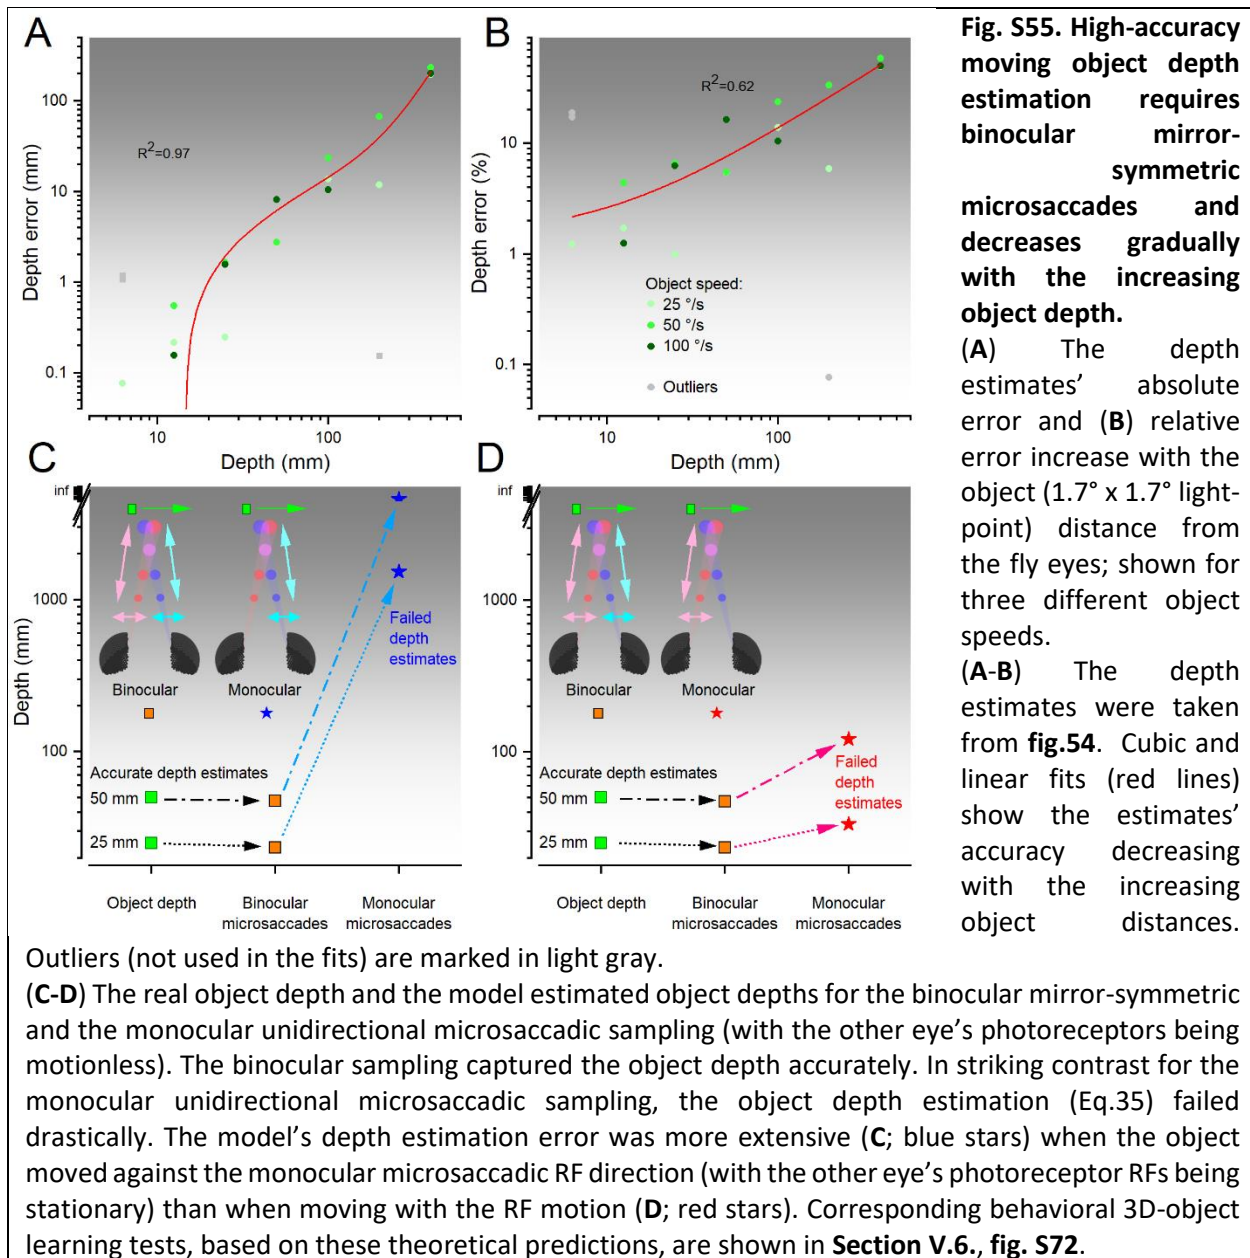

#### IV.14. Stimulus size and movement direction differentially shape R1-R7/8 outputs

We simulated how a collective photomechanical R1-R7/8 microsaccade in a single ommatidium affects each contributing photoreceptor's power to resolve moving object details (**fig. S56**). Because each R1-R6 rhabdomere has (i) a different size and (ii-iii) lays a specific lateral distance off the ommatidium lens center-axis and the cone/pigment cell aperture's outer rim, every R1-R6 samples light input during the microsaccade differently. Whilst, correspondingly, the stacked R7/R8 rhabdomeres move away from the lens center axis but not far enough for their responses to be shaped by the aperture's light clipping.

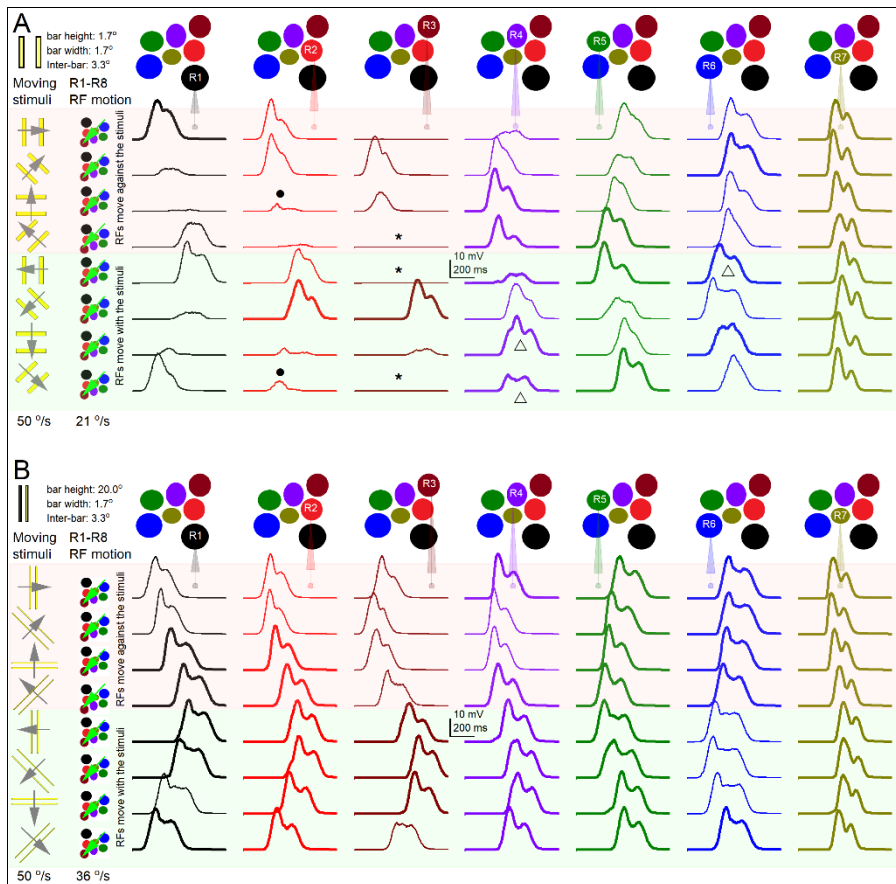

**Fig. S56. Stimulus size and direction.** R1-R7/8 photoreceptors best resolve the stimuli that move in the same direction as their receptive field (RF). **(A)** Two short hyperacute bars (1.7° x 1.7°, 3.3° apart with screen resolution: 0.22°/px) cross R1-R7/R8s' RFs at eight different directions, covering 360°. Light-red background highlights the R1-R7/R8 voltage responses to the stimuli that move against the microsaccadic RS motion. Light-green background groups the photoreceptor responses to the stimuli that move along the microsaccadic RS motion. The thick

lines indicate the responses, in which the two bars caused two peaks, and the thin lines those with less clear or no peak separation. **Above:** colored disks indicate the R1-R7 rhabdomeres in a single ommatidium. Below: their voltage responses. **Left:** the ommatidium lens x/y-flipped R1-R7s' RFs (colored disks) and their microsaccadic fast-phase movement direction regarding the given stimuli. \*, • and Δ indicate the interesting cases where the combined microsaccadic movement (here, as initiated either by R1 or R5 photomechanics) could pull the R3, R2, R4, and R6 RFs either entirely or partially away from the stimulus movement path (explanations in the main text). The photoreceptors' voltage responses were adjusted to have maximal light input 350k ph/s and pre-adaption of 35k ph 25°C.

**(B)** Two long hyperacute bars (20° x 1.7°, 3.3° apart with screen resolution 0.22°/px) cross R1-R7s' RFs at eight different directions, covering 360°.

Note, these photoreceptor acuity simulations are deliberately conservative. We used dark-adapted acceptance angles (**Table S6**) without implementing the intracellular pupil mechanism, which would further improve photoreceptor resolvability in diurnal conditions. Nevertheless, we still obtained clear two-peaked responses to the moving hyperacute two bars.

To explore the consequences of these structural and positional dynamics in R1-R7/8 signaling, we tested how well each photoreceptor's voltage response separates in time two short (**fig. S56A**) or two long hyperacute (**fig. S56B**) bars crossing the photoreceptors' receptive fields (RFs) in a different direction at 50°/s. These simulations revealed that:

- R7/R8, with the narrowest rhabdomeres, resolve hyperacute moving stimuli better than R1-R6, which have wider rhabdomeres.

- Irrespective of the ommatidial photoreceptor position, the combined R1-R7/8 microsaccade enhances the resolution of objects that move broadly in the same direction (**fig. S56**, light green background) as the R1-R7/8 RFs; in contrast to moving in the opposite direction (light red background). But even when opposite, vision is still hyperacute. Thus, the simulations predict (or, at least, are consistent with) the observed L2-terminal responses' hyperacute orientation axes (*cf.*, **Fig. 4F** and **Section III.3.**, fig. S36A and C).
- For small hyperacute two bar stimuli, in which dimensions are less than the  $4.5^\circ$  interommatidial angle ( $\Delta\phi$ ) and are moving in a specific direction relatively slowly, the photomechanical activation of a single R1-R6 (as the stimulus first enters its RF) alone can cause a microsaccade that drags:
  - some of its neighbors' RFs out of the stimulus light path (**fig. S56A**, \*), causing a null-signal (no light-induced depolarization).
  - some of its neighbors' RFs only partially out of the stimulus light path (**fig. S56A**,  $\Delta$ ), so that both bars cross their rhabdomere tips fractionally, causing a transient slit-effect. As if a slit appeared on the top of a rhabdomere to narrow its angular sensitivity, improving the resulting response's two-bar resolution (superfine-signals).
  - some of its neighbors' RFs temporarily out of the stimulus light path (**fig. S56A**, ●), so that the first bar is seen but the second one not.

These concurrent null-, single-peak- and superfine-signals may enhance visual objects' spatiotemporal contrasts (dynamic edge-enhancement) at the lamina (the next optic neuropil), as the optically superimposed R1-R6 voltage signals from the seven neighboring ommatidia are pooled in synaptic transmission.

#### IV.15. Theoretical predictions

Our new theory and its simulations - about the corresponding left and right eye photoreceptor arrays sampling depth-information in time - suggest that such *dynamic* sampling of image disparities gives three critical benefits for *Drosophila* vision in respect to using *static* (non-moving) photoreceptor arrays:

- ***It enlarges the stereoscopic field of view.*** In the static case, only 2.5 ommatidial rows of frontal (the left and right eyes') photoreceptors could sample a tiny slice ( $\sim 11.5^\circ$ ) of the world horizontally in stereo. With mirror-symmetric photoreceptor microsaccades sweeping their receptive fields (RFs) side-to-side, this binocular slice (the stereoscopic horizontal field of view) expands to  $>30^\circ$  (**fig. S14**; for the experimental test and conformation, see **Section II.1.ii**, above).
- ***It improves the retinal image resolution.*** In the binocular region, one-half of the photoreceptors (say, ipsilateral) sample information while moving along with the object, and the other-half (contralateral photoreceptors) sample while moving against this motion. With microsaccades moving and narrowing the photoreceptors' RFs, their responses encode much finer (hyperacute) object details ( $<1^\circ$ ) (**Fig. 4** and **Fig. 6**; **fig. S36**) than what static photoreceptors ever could ( $\sim 4.5^\circ$ , limited by the ommatidial spacing). However, crucially, during the dynamic sampling, these photoreceptor response time-differences also simultaneously carry the object depth information to the fly brain.
- ***It improves visual image reliability and combats aliasing.*** Because the ommatidial photoreceptor rhabdomeres are of different sizes and different distances from the center-axis (**fig. S42**) and mechanically interconnected (**fig. S30** and **fig. S31**, possibly by tip-

links), their RFs tile the eyes' binocular field over-completely (**fig. S53**) and their voltage responses to moving visual objects vary (**fig. S56**). This organization means that when pooling the photoreceptor responses in neural superposition, each LMC receives 6 (R1-R6) + 2 (R7/R8 – through gap-junction before the synapse (15, 90)) slightly differing samples of the same local visual object/event (**fig. S52**). As we have shown before for the stochastic QB integration (32), such variability in spatiotemporal sampling improves the accuracy/reliability of the transmitted neural messages (*cf.* wisdom of the crowds (96, 97)) and combats aliasing (4, 48). See **fig. S65** and **Section VI.3.**, below, for the behavioral test and confirmation.

In most seeing animals, because the photoreceptor sampling matrix and the underlying visual circuitry maps the world retinotopically, the spatial information of the neighboring visual points is already genetically encoded in the eye/brain network structure. Therefore, dynamic changes and correlative linking of the objects and their movements in the visual world can be efficiently replayed/represented as temporal differences in the networks' phasic neural responses.

Importantly, our theory further predicts that *Drosophila* would have “short-sighted” stereo vision, seeing close-by objects in higher resolution than those further away from them (**fig. S54** and **fig. S55**). In **Section VI.**, below, we test and verify this prediction.

#### **IV.16. Estimating responses to hyperacuity stimuli with classic stationary eye models**

To estimate how well a hypothetical *Drosophila*, having *static eye structures* with *sampling limited by interommatidial angles* (as is the dominant/classic view in the literature), could differentiate hyperacute contrast differences between two neighboring photoreceptors' receptive fields (single non-overlapping “pixels”, with 5.4° half-width) (**Fig. 6G**). Both test images contained 1° black-and-white stripes, but one also had a single 0.98° black dot in the center. The eye's distance to the screen was the same as in the flight simulator experiments: 25 mm (**fig. 6**), and the screen resolution was 0.01°/pixel. The black intensity was half of the white with maximal photon flux: 500,000 photons/s at 25° C. The resulting intensity difference (transient contrast change) between the two images is ~1.6%. We simulated photoreceptor responses to a 100 ms negative light pulse, comparable to the image intensity of the black dot in the background, and to the stripes images alone, using the four-parameter photoreceptor model to generate the light current. From the corresponding light currents, we simulated the voltage responses. These simulations made it clear that it would be practically impossible for a *static* pixelated *Drosophila* eye to neurally differentiate the 0.98° black dot response from the black-and-white stripe background, which was smaller than the simulation noise.

The scripts to simulate and analyze *Drosophila* ommatidial optics are downloadable from: [https://github.com/JuusolaLab/Hyperacute\\_Stereopsis\\_paper/tree/main/OpticalSimulations](https://github.com/JuusolaLab/Hyperacute_Stereopsis_paper/tree/main/OpticalSimulations)

## V. Binocular Connectivity

### Overview

In the insect brain, the lobula complex neuropile pools visual information from ipsi- and contralateral eyes (35-37). This section describes the identification of a class of binocularly projecting lobula neurons: LC14 neurons in *Drosophila*. We include an exploratory analysis into the organization and connections of these neurons with a view to understanding how they might play a role in behaviors requiring cross-hemispheric connectivity, such as stereopsis.

- LC14 neurons can be categorized into two groups, which are anatomically and functionally distinct.
- They project in a roughly retinotopic fashion contralaterally from one lobula to the other but do not preserve this retinotopicity in transit.
- LC14 neurons exhibit self-connections but connect mainly in transit, where there is unlikely to be a spatial mechanism for connecting to similar LC14 neurons.

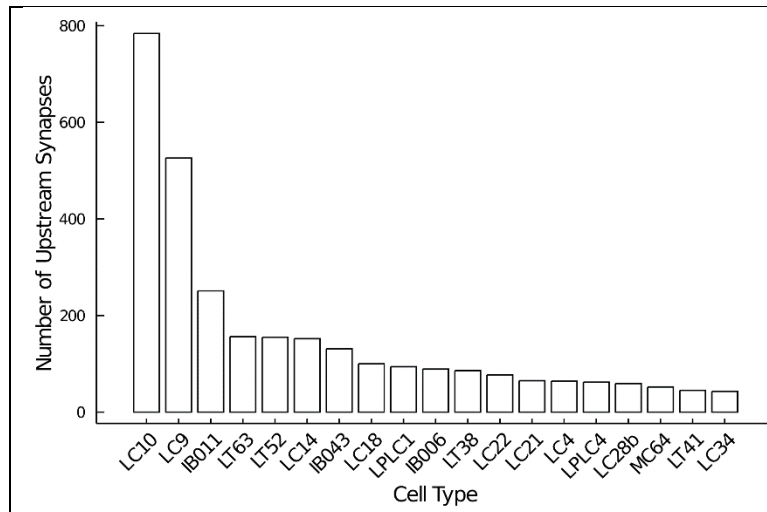

**Fig. S57. Cell types upstream to LC14 neurons.**

Cells that connect to LC14 neurons where the cell type is known. The number of synapses between these cell types and LC14 neurons was counted. LC14 neurons receive inputs from many different types of lobula cells; however, L10 and LC9 neurons represent the two most common known inputs. Many synapses are not from a cell with an identifiable type and outweigh the number of cells for which the type is known by a factor of 2:1.

### V.1. Inputs to LC14

The LC14 neurons are thought to be homologous to the mantis (37, 98) coCOM neurons. In *Drosophila*, they project from one lobula (and the medulla for LC14b neurons. (99, 100)) to the lobula on the contralateral side. As such, they represent one possible class of neurons that integrates visual information across hemispheres. To investigate the LC14 neurons further, we analyzed data from the Hemibrain dataset (101). The dataset contains only a section of the brain, and therefore only has data for sections of the LC14 neurons. It contains only the arborizations within the lobula, some of the commissures to the contralateral side, and the cell bodies. Also, the lobula arborizations are incomplete and do not contain the dorsal-most projections. Despite these limitations, we still could draw valuable insights from the data. The connectome shows that most of this input comes from LC10 and LC9 neurons (fig. S57.). Both neuron-types have been shown to play a role in the circuitry controlling courtship behavior (102, 103). The next most common neuron, IB011, displays some structural similarities to LC14 neurons (104).

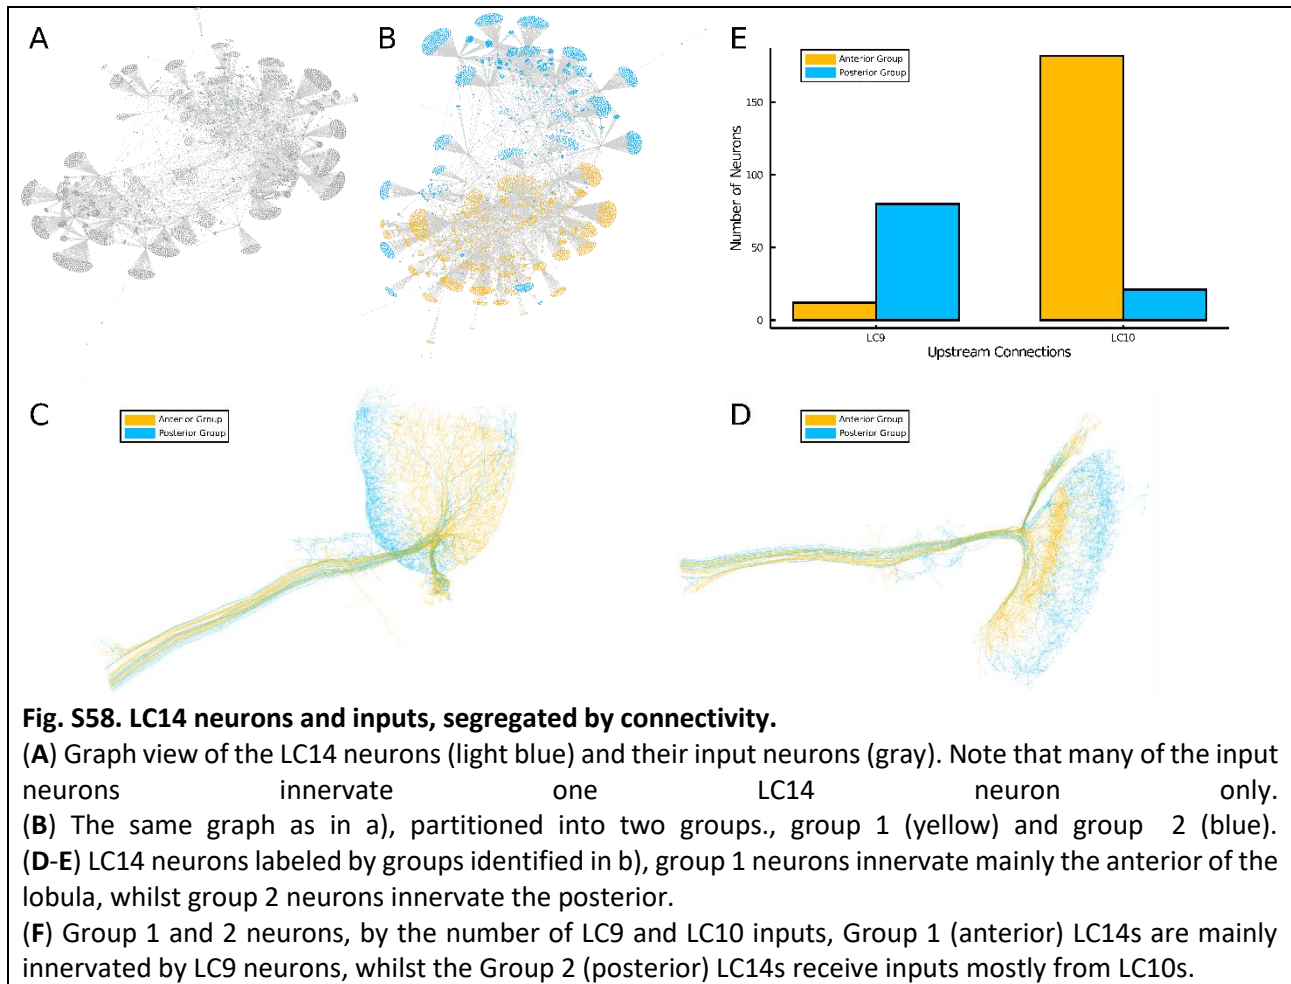

Analysis of the connectivity of the LC14 neurons and their inputs reveals two putative subclasses of LC14 neurons. We used the METIS package (105) to segregate each cell into one of two subgroups (fig. S58A-B). These subgroups, which were partitioned based on their connectivity only, are anatomically segregated, consisting of an anterior and posterior group (fig. S58C). Moreover, to support the idea that these subgroups reflect a representational or functional distinction, the two groups appear to be innervated by distinct inputs, with the posterior subgroup being innervated primarily by LC9 neurons and the anterior primarily by LC10 neurons. These distinctions between the two LC14 subgroups could reflect that they are a causal factor in separate behaviors, or that they carry distinct representations in lieu of carrying out a common behavior or set of behaviors.

## V.2. Retinotopicity of LC14 neurons

To assess the pattern of projection (*i.e.*, do the neurons project from one area of the lobula to the same area on the other side), we selected MCFO images from the *flylight* database that were identified in the NeuronBridge (106) tool as expressing in at least one LC14 neuron. After manual quality control to look for datasets containing low misexpression, we collated the data (fig. S59D). The LC14 neurons appear to project from one area of the lobula to an approximately similar area on the contralateral side, although this cannot be ascertained to a fine degree.

Since the LC14 neurons appear to roughly conserve their topography contralaterally, we asked whether this was conserved ‘in transit’, as, for instance, has been found for other lobula columnar neurons (100). We defined the input centroid for an LC14 neuron as the median location of the

post-synaptic densities. We defined the axon portion as the axon skeleton fragment that was furthest from the input centroid (**fig. S59A-B**). To determine whether the centroid map in the lobula was topographically similar to the axon portions, we calculated how many of the nearest neighbors to each centroid in the lobula were shared with the same cell at the commissure (**fig. S59C**). This approach appears to show that the topography of the lobula is not preserved ‘in transit’.

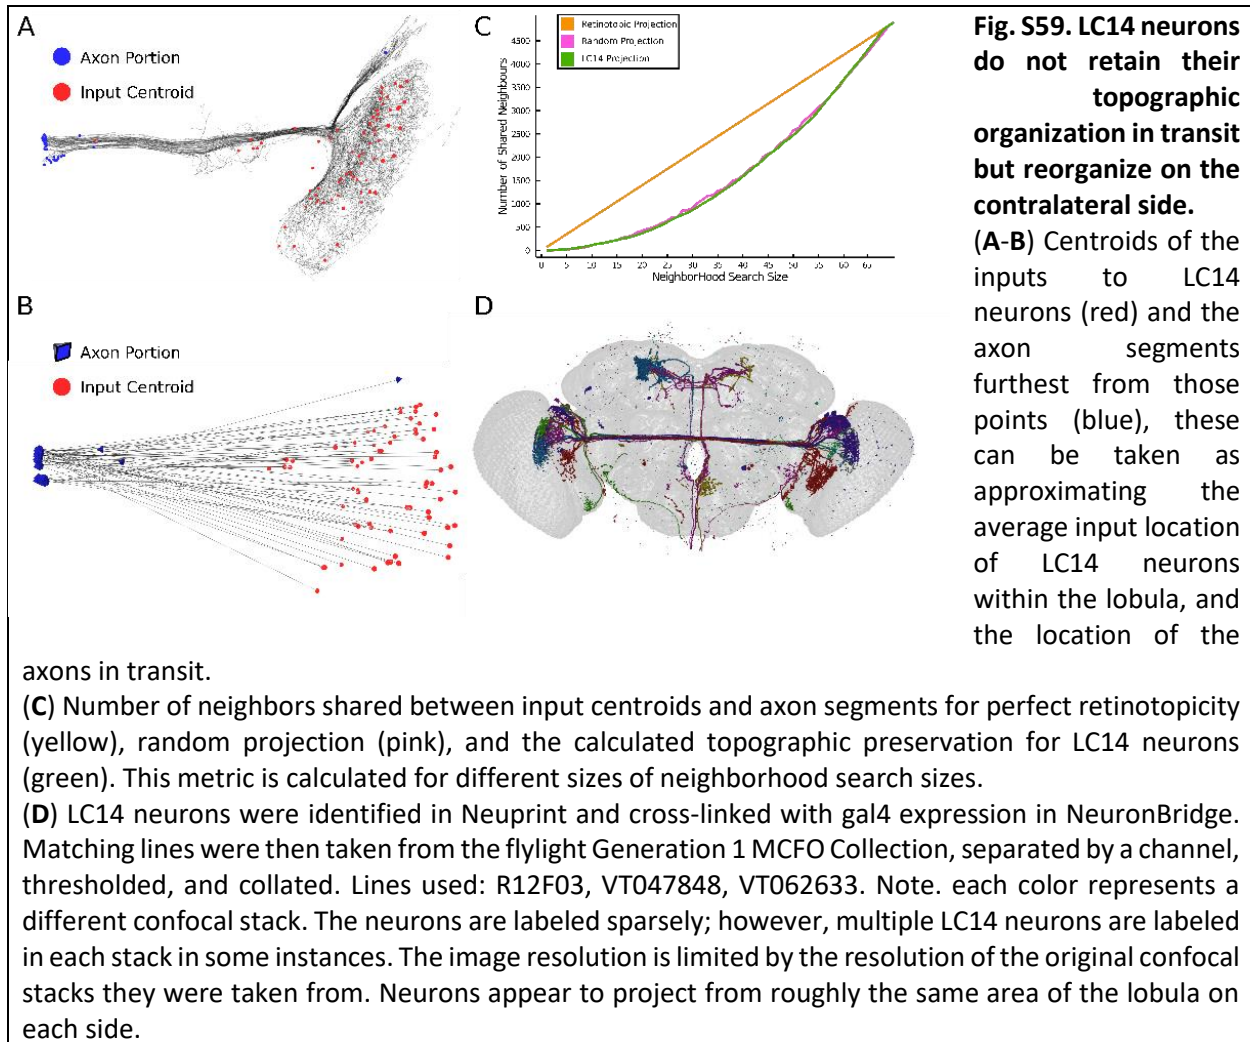

### V.3. LC14 self connections

This random projection, when taken with the pattern of LC14-self connections, raises an interesting question. (98) proposes that in the Mantis, coCOM self-connections make up part of the circuit for disparity detection. In *Drosophila*, while self-connections are the 6<sup>th</sup> most common type of LC14 input synapse, they are the 3<sup>rd</sup> most common when looking only at cell connections (ignoring the number of synapses between two of the same cells). LC14 neurons tend to make between 1-3 connections to other LC14 neurons (**fig. S60C**). Most of these connections appear in the commissure (**fig. S60B**). Since we have shown that the organization of LC14 neurons in the commissure is not conserved, this raises the possibility that the self-self connections are random, or that there is some mechanism by which the neurons can identify adjacent neighbors within the lobula without relying on anatomical proximity in the commissure.

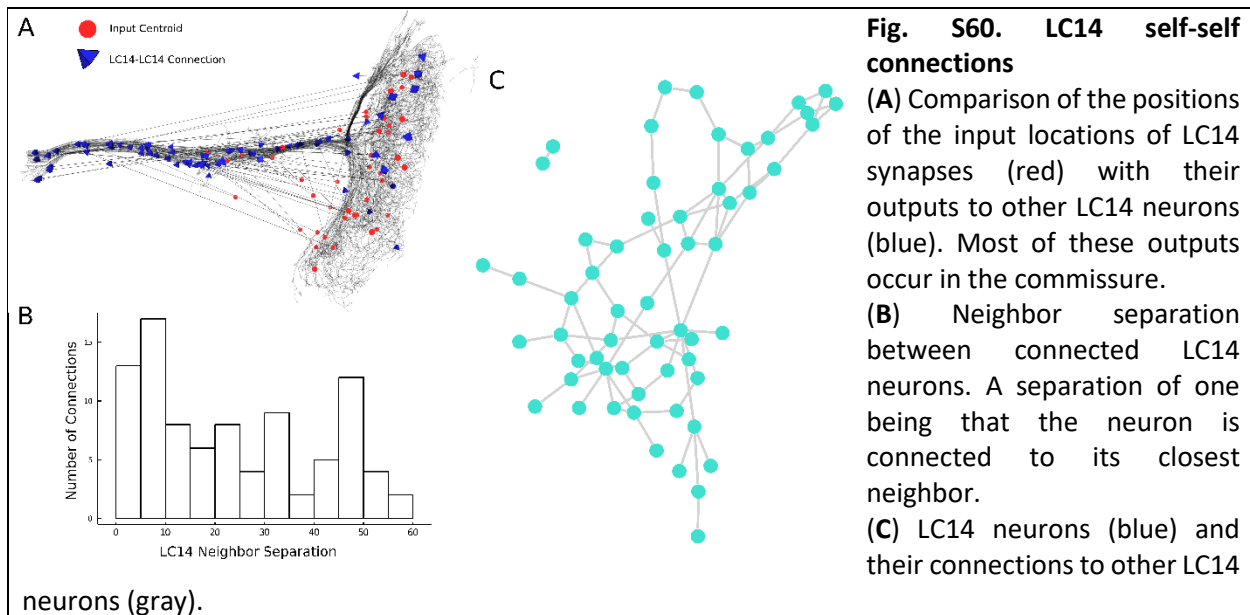

## VII.4 Summary

Everything taken together, it is likely that LC14 neurons play some role in integrating visual information across hemispheres. The projection pattern suggests that they roughly innervate the same areas on each lobula, although there could be subtle distinctions. Since the lobula is organized retinotopically (*e.g.* (107)), this suggests that the neurons are integrating information from roughly the same regions of visual space in each eye. As for what information this might contain or what purpose this integration is for, their inputs suggest that part of their role has something to do with courtship behavior. Finally, while they anatomically appear to project retinotopically, connections between LC14 neurons themselves are unlikely to represent any anatomical structure, which lends itself to a more global processing role. Although it could also be the case that direct connections to the same cell type are of less importance in *Drosophila* than in the homologous Mantis coCOM neurons.

The scripts to simulate and analyze *Drosophila* lobula connections are downloadable from: [https://github.com/JuusolaLab/Hyperacute\\_Stereopsis\\_paper/tree/main/ConnectivityAnalysis](https://github.com/JuusolaLab/Hyperacute_Stereopsis_paper/tree/main/ConnectivityAnalysis)



## VI. Flight simulator experiments

### Overview

This section describes flight simulator experiments to measure (i) *Drosophila* optomotor behavior from hyperacute to coarse 2D stimuli, (ii) visual salience to hyperacute 2D and 3D stimuli, and (iii) associative avoidance learning of these stimuli. It gives central background information and additional supporting evidence for the results presented in the main paper, including:

- Optomotor responses are stronger to the closer hyperacute rotating scenes of the same angular resolution (2.5 vs. 5.0 cm away from the fly eyes), indicating short-sighted *Drosophila* vision/stereopsis (*i.e.*, the flies are seeing nearby objects in higher resolution). These results are consistent with the theoretical predictions; see **Sections IV.12.** and **IV.15.** above (**Fig. 5** and **fig. S55**).
- The well-known optomotor response reversal to a rotating  $\sim 7^\circ$  stripe-pattern originates from the mirror-symmetric left and right eye photoreceptor microsaccades, whereby one eye's microsaccades move with, and the other eye's against the screen rotation, causing a neural imbalance in the optic flow perception.
- The optomotor response reversal is velocity-dependent - occurs when the field rotation speed approaches the eyes' microsaccade speed ( $\sim 40\text{-}50^\circ/\text{s}$ ) - and can be stopped by painting one eye black, eliminating the eyes' optic flow imbalance driving the behavior. Thus, the optomotor response reversal does not result from spatial sampling aliasing (the eyes' ommatidial photoreceptor spacing) but perceptual aliasing. These results pair with the theoretical predictions; see **Section IV.15.** above.
- *Drosophila* has super-resolution stereoscopic vision:
  - It finds hyperacute 3D objects more salient than the same area/contrast 2D objects.
  - It needs two eyes to see hyperacute 3D objects.
  - It needs binocular mirror-symmetric microsaccades to see 3D objects.
  - It uses both R1-R6 and R7/8 photoreceptors cells for stereopsis.

### VI.1. *In vivo Drosophila* preparation

*Drosophila* were raised on molasses-based food at 25°C on a 12-h light/12-h dark cycle. 2- to 9-day-old female flies (vast majority 4-day-old flies) were briefly cold-anesthetized (on a bespoke Peltier cooling/preparation-making stage) for fixing a small copper-wire hook (0.06 mm  $\varnothing$ ) with UV-light-curable glue (Loctite) between the head and thorax (4).

### VI.2. *Drosophila* flight simulator system

A tethered flying fly was connected to the torque-meter by a small clamp holding the copper-wire hook, which fixed its head in a rigid position and orientation while transducing the fly's yaw torque (left and right rotation attempts) into a voltage signal (**fig. S61A-B**). The fly was positioned in the center of a hollow plastic transparent cylinder (cup - its flight arena), which displayed high-resolution visual stimuli: black laser-printed patterns (Sharp MX-5141 printer; 1,200  $\times$  1,200 dpi resolution) and/or small 3D-objects attached on white paper, surrounding the fly's long axis. We either used a small cup (inner  $\varnothing$  50mm; **fig. S61C**) or a large cup ( $\varnothing$  100 mm; **fig. S61D**), which kept the stimuli at 25 or 50 mm from the fly eye, respectively. In either case, the cups were rotated around the vertical axis by a stepping-motor, moving the stimuli free of flashing or aliasing. Outside, the cups faced a layer of surrounding diffusers, and behind them a ring-shaped flicker-free light-tube (special full-band: 350-900 nm), which uniformly illuminated the stimuli with no

visible or only negligible shadows. Although perceptually bright, this background intensity was, nevertheless, 0.5-1.5 log units less than the maximum used in the L2-neuron  $\text{Ca}^{2+}$ -imaging recordings (**Fig. 4**) and previous intracellular recordings (4); measured by Hamamatsu Mini C10082CAH spectrometer (Japan).

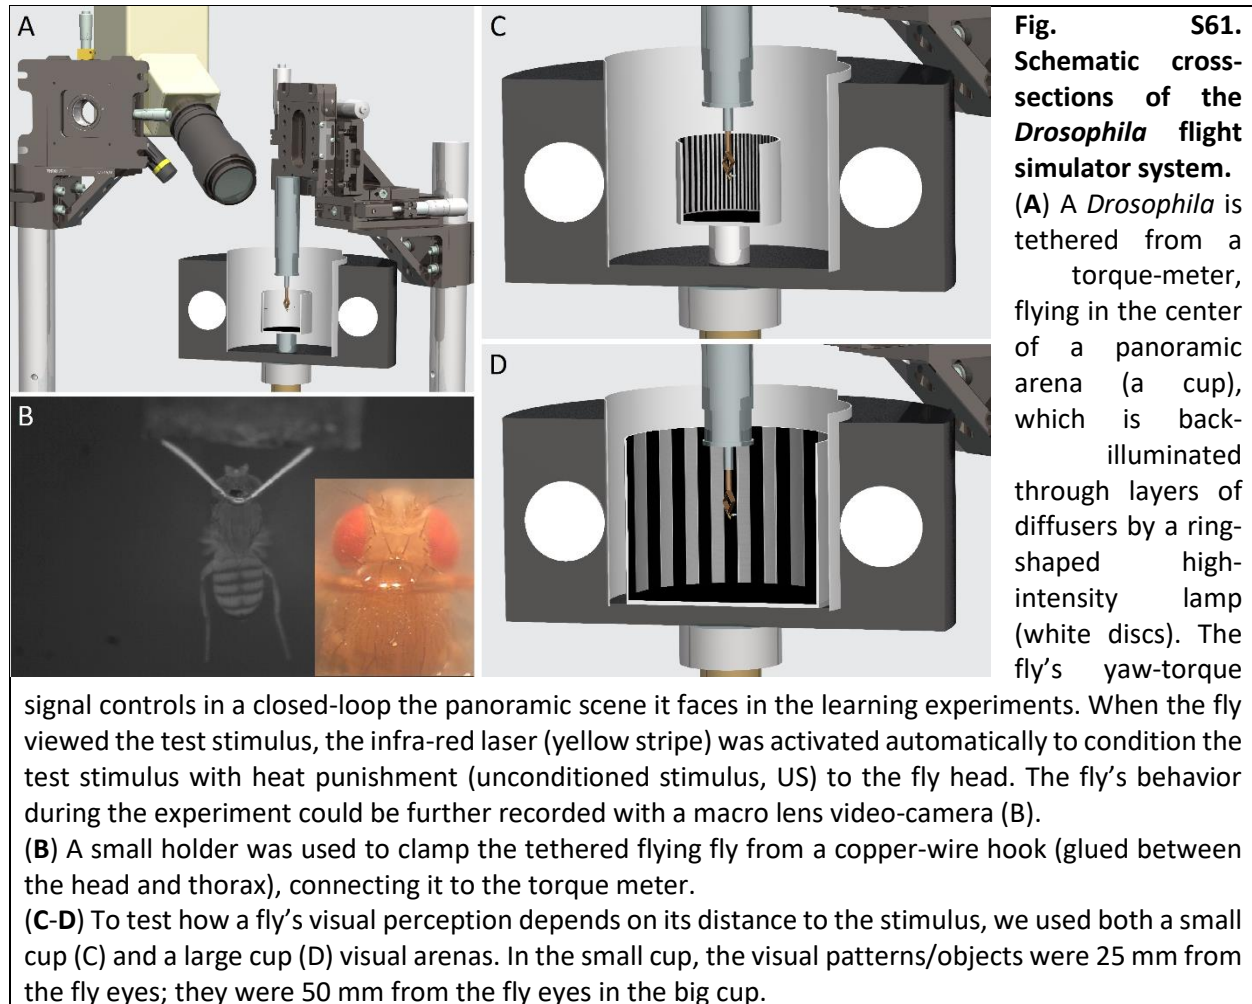

The flight simulator system itself was mounted on a vibration isolation table inside a black-painted and light-proofed steel-walled Faraday cage, which had a black roller curtain at the front to block any outside light (potential visual cues) affecting the experiments.

### VI.3. Optomotor behavior (open loop)

A fly saw a continuous panoramic black-and-white stripe-scene of a specific angular resolution on the given cup's inner wall. After 1 s of viewing the still scene, the scene was spun to the right (clockwise) by a stepping motor for 2 s, stopped for 2 s, before rotating to the left (counterclockwise) for 2 s, and stopped again for 1 s. This 8 s stimulus was repeated 10-25 times, and each trial, together with the fly's yaw torque responses, was sampled at 1 kHz and stored in a hard-drive for later analysis. Typically, a tethered flying fly attempts to follow the moving panorama, generating optomotor responses (yaw rotation signals), the strength of which is thought to reflect the strength of its motion perception.

If a fly stopped flying during trials, it would be encouraged to start flying again immediately with puffs of air or provided with a paper ball soaked with 30% sucrose solution. Trials were stopped if flies stopped flying >5 times during a 2 m period.

### ***Testing hyperacute vision distance range***

Owing to the left and right eyes' mirror-symmetric photomechanical photoreceptor contractions (**Figs 1-3**; see **Sections II.** and **III.**, above) and the resulting phase differences in the binocular receptive field dynamics (**Figs 4-5**; see **Section IV.**, above), our theory predicts that a fly should see the nearby world in hyperacute 3D but the more distant world in blurry 2D.

- *Notably, such dynamics would offer a *Drosophila* a way to sense object size.* For instance, a small nearby object, another *Drosophila* - seen frontally by the left and right eye, would generate a stereoscopic pair of separate images (with phasic time differences in their neural representations), signaling no danger. But a distant object of the same angular size would have little or no such stereo-neural cues. Therefore, it could be perceived as being further away, signaling that this object is bigger and potentially dangerous.

To test whether the flies' visual acuity, as defined by their optomotor response strength, depended on how far the presented stimulus was (*i.e.*, the distance from the fly eyes to the stripe scene), we used both the small and large cup (**fig. S62**). For the small cup, its stripe patterns (25 mm from the eyes;  $\varnothing = 50$  mm) were within *Drosophila*'s estimated stereo vision range (0-30 mm), whereas for the large cup, its patterns (50 mm from the eyes;  $\varnothing = 100$  mm) should lie closer to the outer edge of this range. The fixed stimulus parameters for moving stripe scenes, as shown in the figures, were: azimuth  $\pm 360^\circ$ ; elevation  $\pm 45^\circ$  (small cylinder) or  $\pm 40^\circ$  (large cylinder); contrast, 1.0, as seen by the fly. The large cylinder's top was less illuminated because it extended further away from the surrounding ring-light (**fig. S62B**). However, as we kept each fly at the same vertical position regarding the ring-light, they experienced similar light intensity changes with both the cups.

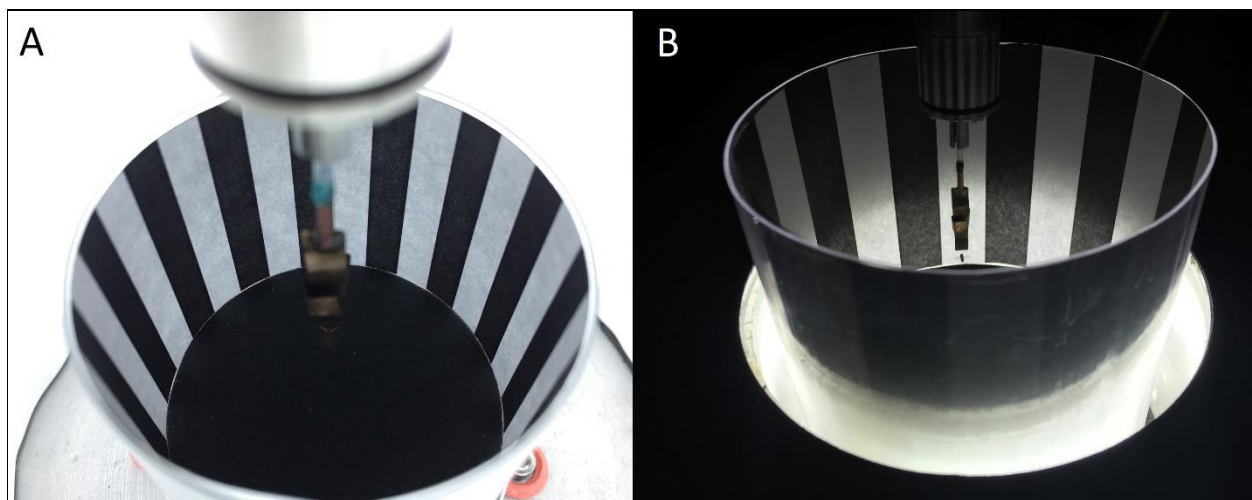

**Fig. S62.** Testing optomotor behavior with two different size arenas: the small and the big cup. Their black stripe patterns were printed on white paper so that the resulting angular stripe widths were similar, as seen by the tested flies.

**(A)** A tethered *Drosophila* viewing the stripe patterns in the small cup.

**(B)** A tethered *Drosophila* viewing the stripe patterns in the large cup.

**Optomotor tests with the small cup.** Black-and-white stripe-scenes (spectral full-width: 380-900 nm) of five different spatial resolutions (wavelength [bar-to-bar-distance]: 2.34° [1.17°], 4.68° [2.34°], 6.43° [3.21°], 12.86° [6.43°] and 25.71° [12.35°]) were rotated at 45 and 300 °/s (**fig. S63A-D**). As the *light* control, to examine whether airflow or some hidden features in the stimulus panorama affected optomotor responses, we used either white paper or a separate white diffuser cup of the same size or both, rotated at the same two speeds. As the *dark* control, the same flies' optomotor responses were recorded to the scene rotations in complete darkness. The *light* and *dark* controls evoked either no or only minimal torque responses.

**Optomotor tests with the large cup.** We tested the flies' torque responses to 2.43° [1.215°], 4.86° [2.43°], 6.92° [3.46°], 13.84° [6.92°] and 27.69° [13.845°] wavelength [bar-to-bar-distance] black-and-white stripe-scenes, rotated at 45 and 300 °/s (**fig. S63E-H**). Thus, to a tethered fly, the black-and-white bars in the corresponding large and small cup stripe-scenes had broadly similar angular widths, but these images were now twice as far from its eyes. *Light* and *dark* controls were adapted for the large cup, as explained above. Again, these control stimuli evoked either no or only minimal torque responses.

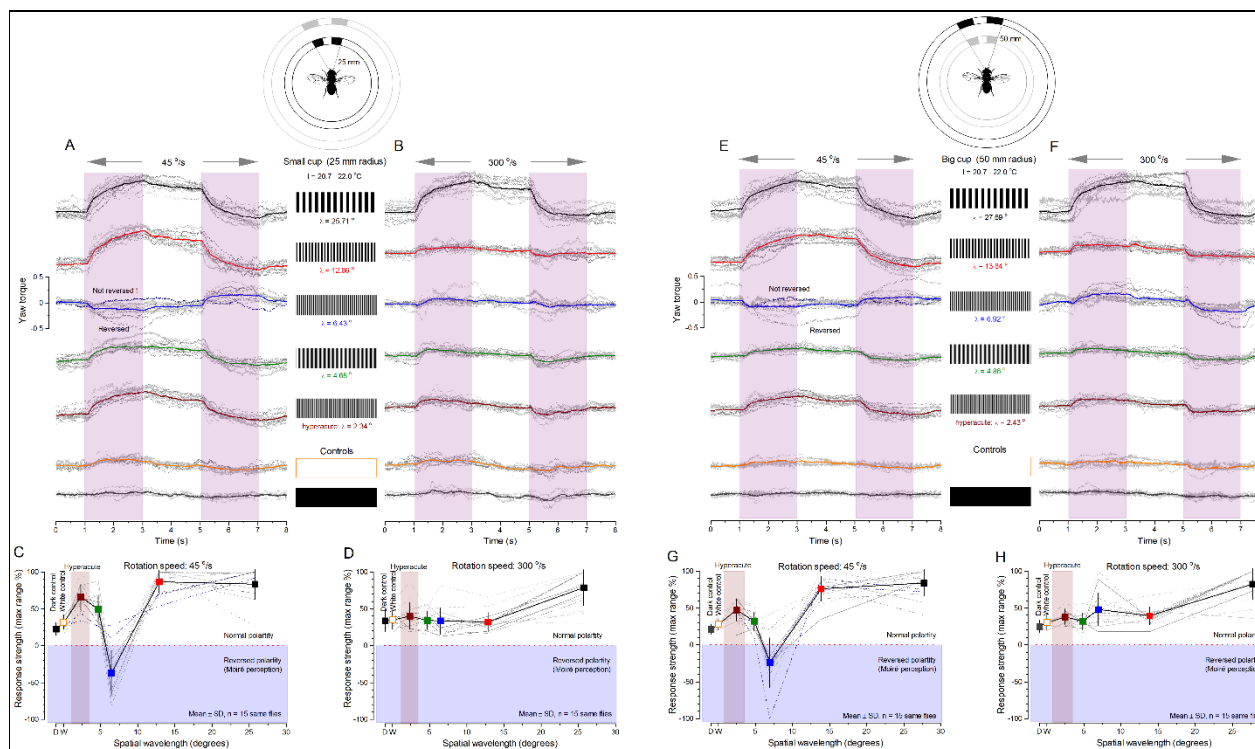

**Fig. S63. Optomotor responses to clock-wise and counter-clockwise rotated visual stimuli of different wavelength and velocity; presented either 25 mm (small cup: A-D) or 50 mm (large cup: E-H) from the *Drosophila* eyes.**

(A and B) Small cup: Each fly was tested with five black-and-white stripe patterns of different wavelengths and two control stimuli (white-paper and dark), rotated at two different velocities (A: 45°/s and B: 300°/s). In each case, the specific stimulus was presented 10-times. For each fly, the resulting optomotor responses (yaw-torque) were first averaged and then scaled by normalizing them with their largest average response for the most sensitive stimulus. The thin traces show these stimulus

strength-normalized averages for each fly and the thick traces their corresponding population means ( $n = 15$  flies).

**(C and D)** Small cup: Optomotor response strength depends on the stimulus wavelength and velocity (C:  $45^\circ/\text{s}$  and D:  $300^\circ/\text{s}$  rotations). Overall, *Drosophila* tracked most vigorously both coarse (black,  $25.71^\circ$ ) and hyperacute (wine,  $2.34^\circ$ ) stimulus rotations. 13 out of 15 *Drosophila*'s optomotor responses reversed during  $6.43^\circ$  (C, blue) black-and-white stripe rotations at  $45^\circ/\text{s}$ , but this reversal never occurred during  $300^\circ/\text{s}$  (D, blue) rotations.

**(E and F)** Big cup: Each fly was tested with five black-and-white stripe patterns of different wavelengths and two control stimuli (white-paper and dark), rotated at two different velocities (E:  $45^\circ/\text{s}$  and F:  $300^\circ/\text{s}$ ), with each of these stimuli presented 10-times. The resulting optomotor responses were averaged and normalized for every fly, as in A and C, with the thin traces showing these averages and the thick traces the population means ( $n = 15$  flies).

**(G and H)** Big cup: Optomotor response strength depends on the stimulus wavelength and velocity (G:  $45^\circ/\text{s}$  and H:  $300^\circ/\text{s}$  rotations). Overall, *Drosophila* tracked most vigorously coarse (black,  $27.00^\circ$ ) and hyperacute (wine,  $2.43^\circ$ ) stimulus rotations. 12 out of 15 *Drosophila*'s optomotor responses reversed during  $6.92^\circ$  (G, blue) black-and-white stripe rotations at  $45^\circ/\text{s}$ , but this reversal never occurred during  $300^\circ/\text{s}$  rotations (H), with some flies' responses being unexpectedly strong (blue,  $6.92^\circ$ )

The optomotor responses of individual flies to repeated field rotations vary in strength and repeatability (**fig. S63**, thin traces), but their visual performance to different spatial resolution stripe scenes is different. These differences can be quantified by measuring the mean torque response of a single fly to stimulus repetitions and by averaging the mean responses of the many flies of the same stripe scene resolution (thick traces). This procedure reduces noise and non-systematic (arbitrary) trends of single experiments, revealing the underlying response strength and optomotor behavior characteristics. Characteristically, a fly's torque response returns gradually to baseline after the optomotor stimulus stops, but this can take seconds, varying with individual flies (4, 15). Accordingly, in our experiments, which comprise only brief 2-s-long inter-stimulus-intervals, the torque responses typically recovered only fractionally (10-70%) during these still periods toward the baseline. Therefore, for comparing the optomotor behavior at different stripe scene resolutions, we used the maximum range (or peak-to-peak) of the torque response, evoked by the combined leftward and rightward field rotation stimulus.

Consistent with our previous results (4), the optomotor responses to the small cup's hyperacute (wavelength:  $2.34^\circ$ ), fine ( $4.68^\circ$ ) or coarse ( $12.86^\circ$  and  $25.71^\circ$ ) stripe-scenes (at 25 mm from the eyes), irrespective of the tested rotation speeds, showed no aliasing, which otherwise would have been perceived as slowed down image rotation, eventually reversing to the opposite direction (the reverse rotation effect). However, in clear contrast, we found that ~80-87% of the flies showed response reversing (41) to a  $6.43^\circ$  stripe-scene when rotated at  $45^\circ/\text{s}$  (**fig. S63C and G**, thin traces), indicating that with these stimulus settings, the flies likely *perceive* Moiré-like visual effects. Yet notably, with high rotation speeds, such as  $300^\circ/\text{s}$ , the optomotor responses to the same  $6.43^\circ$  stripe-scene did not reverse but normally followed the rotations (**fig. S63D and H**, blue squares). Moreover, ~13-20% of the flies never reversed their optomotor responses to any test stimuli. Such a fly- and velocity-dependent selective motion perception reversal (for a narrow stimulus wavelength range only) suggests that this behavior unlikely resulted from eye size differences - the average inter-ommatidial angle would be the same for small or large compound eyes - or spatial sampling-aliasing attributable to  $3.5$ - $4.5^\circ$  interommatidial angles.

Crucially, the flies generated stronger optomotor responses to the hyperacute stripe patterns of similar angular widths when closer to their eyes (*cf.* **fig. S63C** and **G**, wine squares; **fig. S64**). This finding is consistent with our theory about how the mirror-symmetric left and right eye microsaccades sample 3D-information (see **Sections IV.13.** and **IV.15.**, above), predicting that *Drosophila* has short-sighted (stereo) vision.

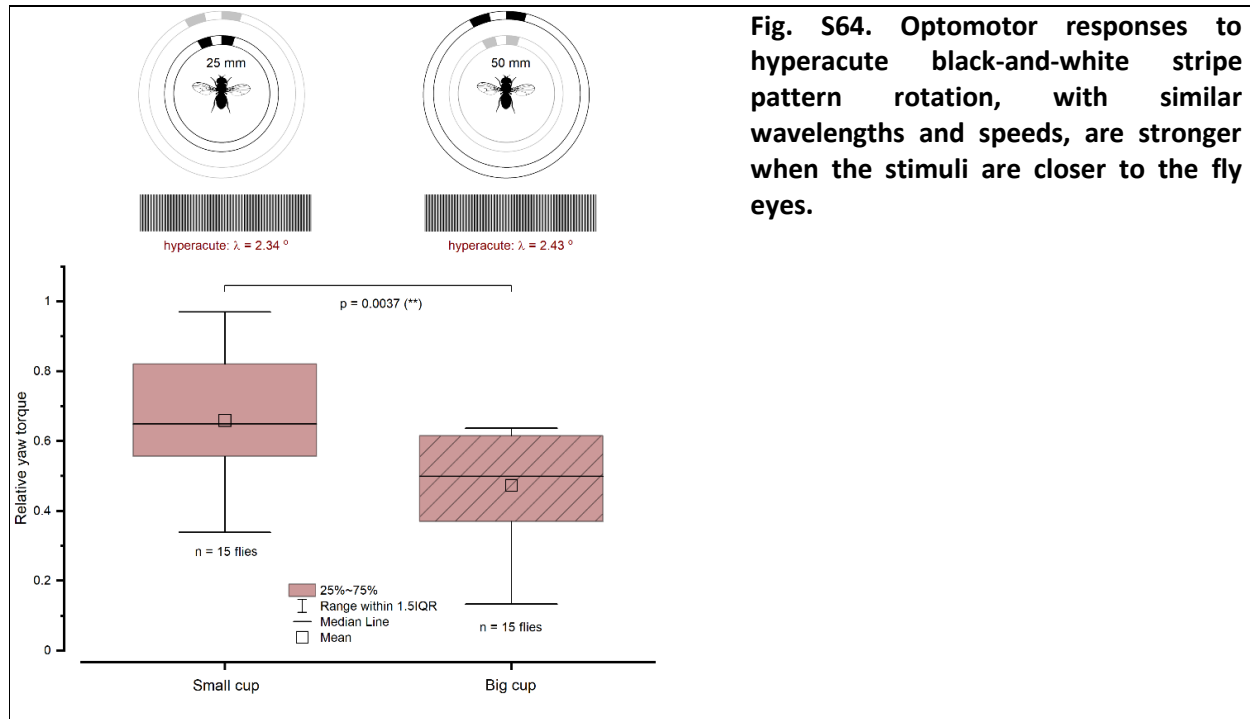

***Mirror-symmetric photomechanical photoreceptor contractions reverse optomotor perception to slowly rotating (45 °/s) scenes with ~6.5-7.5° vertical stripe patterns.*** As we and others have shown earlier, *Drosophila* eyes' sampling matrixes are not fully orderly. R1-R7/8 rhabdomere sizes and positional off-sets differ (4), their optically superimposed microsaccades track local light intensity changes (see **Section II**, above), R7/8 pigmentation is stochastically distributed over the majority of the eye surface (33) and the photoreceptor's connectivity matrix is asymmetric (4, 23). Therefore, we can be confident that selective pressures have tailored the eyes' neural images at the level of photoreceptors and first interneurons to be *free of sampling aliasing* (4, 108-110). Nevertheless, in certain unusual stimulus conditions, which the flies would not normally encounter in the natural environment, mirror-symmetric left and right eye photoreceptor microsaccades can lead to imbalanced image cross-correlation later at the motion detection computations, causing *perceptual aliasing* (111).

Theoretically, the dominant contributing factor for the observed *perceptual aliasing* to the 45°/s rotating ~7° stripe cup should come from the left and right eye's mirror-symmetric photoreceptor microsaccades, which themselves travel 40-50°/s. For one eye's photoreceptors, their microsaccadic speed and direction would broadly match the stimulus rotation, causing their RFs to lock to the moving stripes rapidly. Thus in the retinal mosaic, those neurally superimposed near-neighbor LMC pixels paired 6-8° apart for retinotopic depth/motion detection (see **Section IV.12.**, above)(92) would point to similar stripe patterns, seeing little stimulus change; signaling little or

“no-movement”. At the same moment, the other eye’s photoreceptor microsaccades would make their RFs travel against the rotation, seeing “double-fast” moving stripes flashing by. For the fly brain, this *perceptual* “dynamic imbalance” between the left and right eye inputs may appear as if the stimulus rotated in the opposite direction, triggering an optomotor response against the actual stimulus rotation. Alternatively, the fly may perceive the stimulus approaching one side and thus turn away from it to re-center itself and balance the optic flow (112). Of course, the eyes’ input imbalance would reverse during their photoreceptor microsaccades’ slow-phase, which moves the RFs in the opposite directions (**Fig. 3F**; see also **Section II.6.**, above). But as the refractory slow-phase motion is weaker than the transient fast-phase, it may impact the fly perception less.

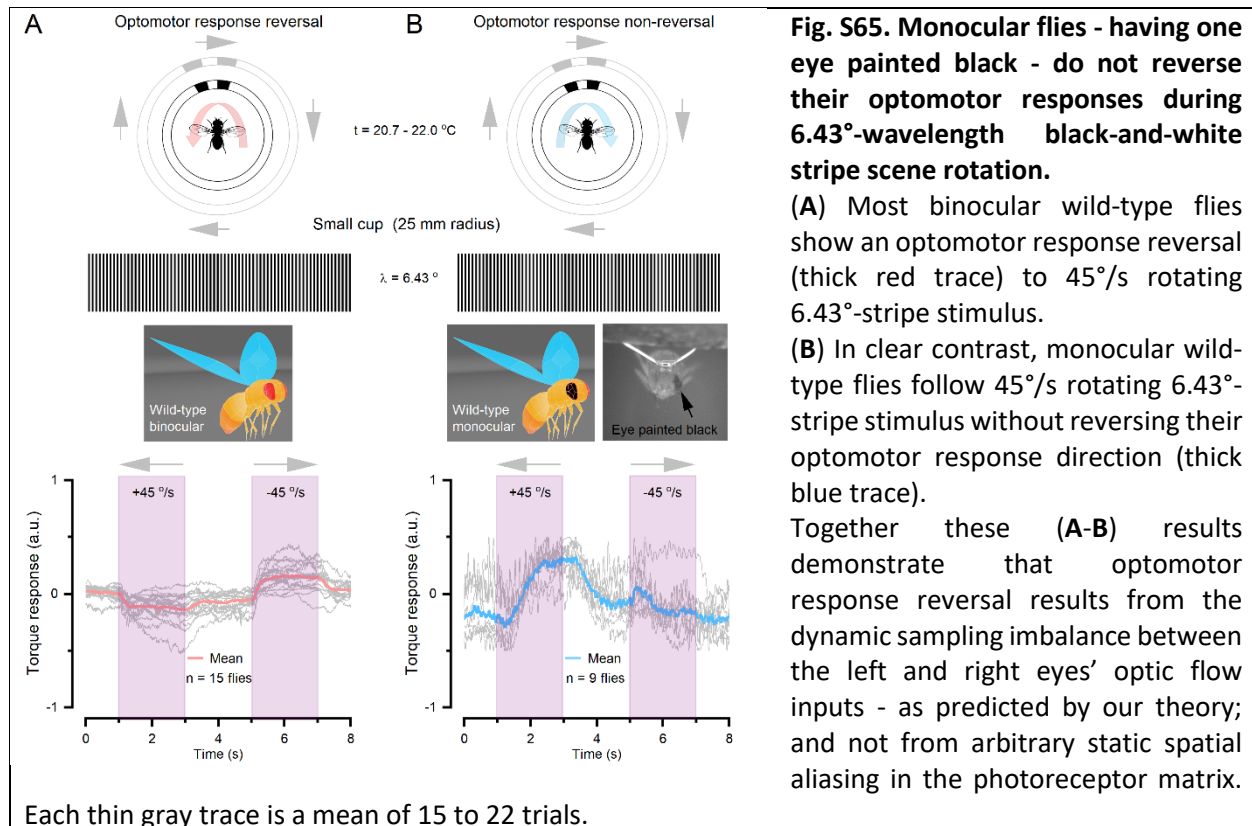

To test this concept directly, we painted *Drosophila*’s one eye black (left or right; see **Section VI.6.**, below, for paint details), eliminating its counter-rotating microsaccadic RF movements affecting the optomotor behavior, and repeated the experiments (**fig. S65.**). As predicted, we now found that the monocular black-eye-flies turned along with the 45°/s rotating 6.43° stripe stimulus, in contrast to the normal two-eyed flies, which in most cases turned against it. In total numbers, 7/9 black-eye-flies followed the rotating stimulus direction consistently (100%, in every trial), whereas 2/9 of them followed the stimulus ~90% of the trials (turning against the rotation only ~10% of the time). Such slight hesitancy (or variation) might have resulted from these two flies’ painted-eyes perhaps being less-perfectly light-proof. Overall, this experiment demonstrated that the *reverse optomotor turns, as tested in a conventional flight simulator system, result from perceptual aliasing; and not from sampling aliasing in the photoreceptor matrix* (41). Nevertheless, the full neural mechanism and dynamics behind such *perceptual aliasing* are likely to be more complicated and may involve other factors and even other senses.

#### VI.4. Studying stereopsis using the *Drosophila* flight simulator system

In this study, we used real object depth rather than prisms or colored filters (as in the praying mantis work (37, 93)) or mirrors or goggles (as in the mammal/bird work (113-115)) to test the visual stereopsis behavior. Could a *Drosophila* use monocular or other cues in the flight simulator experiments, such as motion parallax or air currents, to distinguish the hyperacute 3D objects, accounting for the visual salience (Fig. 6A-J) and learning results (Fig. 6K-P) shown in the main paper?

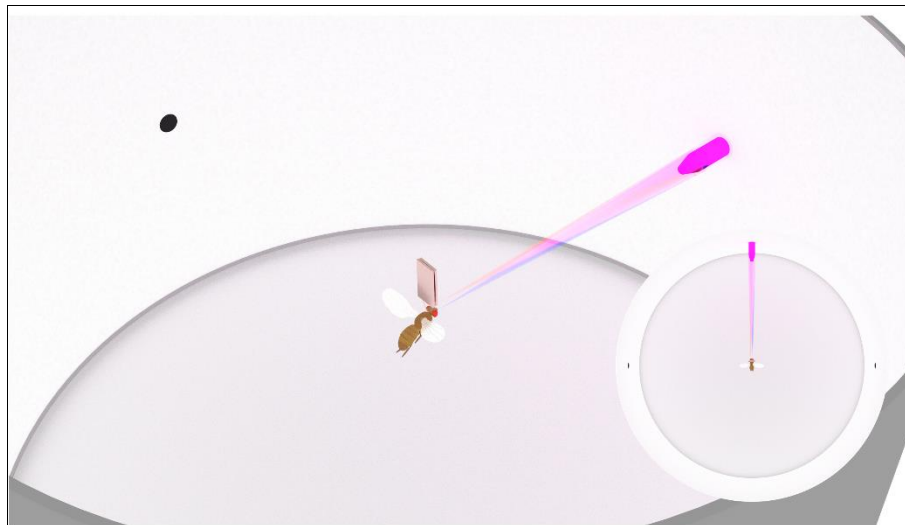

**Fig. S66. A tethered *Drosophila* must use both eyes to resolve and recognize the hyperacute 3D-pin in our flight simulator system.**

In the closed-loop configuration, a fly fixates on the 3D-pin from a fixed distance (2.5 cm), making the pin fall within single corresponding left (red beam) and right (blue) eye photoreceptor

receptive fields (RF, or pixels). The fly's fixation behavior, as measured by the torque-meter, drives minute left-to-right-to-left pin movements (left-to-right-to-left cup rotations), evoking mirror-symmetric photomechanical microsaccades in the left and right photoreceptor. Because the pin moves with one RF and against the other, its movement causes phasic differences in the photoreceptor voltage responses (see Section IV.9., above). The fly brain can use this dynamic neural image disparity to work out the pin size and distance from the fly eyes. Importantly, in this experimental design, as the fly is clamped to the torque-meter with its head immobilized, it cannot generate monocular cues, such as motion parallax, by approaching the pin or moving around it. Therefore, the fly needs two eyes to visually differentiate the 3D-pin-attractor from the 2D-dot-distractors of the same contrast and 2D-size. The RF sizes and angles are the same as extrapolated in Section IV.9. above. See also fig. S67 and fig. S68, below.

The control measures in our experimental design eliminated these concerns. In our flight simulator system, a tethered fly saw the tested objects from a fixed distance (2.5 cm) and could not move its head to generate translational motion parallax (fig. S66). Therefore, as the fly could not approach the object frontally by orienting towards it, there were no monocular cues it could have used to construct a 3D representation of the object neurally. Moreover, if the fly-eye optics presented the world spatially with 4.5° pixelation (interommatidial angle) and the tested dots/pins were <3°, monocularly, each tested object would fall within a single pixel. Therefore, to have seen such a small 3D object, the fly must have used both its left and right eyes. This theoretical axiom was experimentally demonstrated in Fig. 6K-L, while the non-visual cues, including the air current, were eliminated using the blind controls (Fig. 6M). Crucially, these results, together with those from further binocular (Fig. 6N and P) and monocular (Fig. 6O) microsaccade controls, confirmed



that *Drosophila* left and right eye photoreceptors must generate mirror-symmetric synchronous microsaccades to see small 3D objects; making the compound eyes stereopsis dynamic and phasic along with the core theory of this paper.

### VI.5. Saliency experiments (closed-loop)

*Drosophila* yaw torque responses were used to control the cup rotation, enabling the fly to choose what visual features/patterns in the panoramic scene it wanted to see. When a fly sees something interesting that it intends to inspect more closely, it characteristically brings that object in the frontal (stereo) view, “fixating to it” with small left and right rotations that keep the object simultaneously visible to both its left and right eye. In contrast to what has been shown for LED-arena type of stimulation (116), the flies find small dots attractive (and not aversive) in our flight simulator system, which uses printed visual objects and is free of LED pulse-width intensity-modulation that might scare *Drosophila*. Another key difference is the small dot sizes. We used  $1^\circ$  dots, which are a lot smaller than the “small” square objects ( $30^\circ$ ) used in the previous study (116).

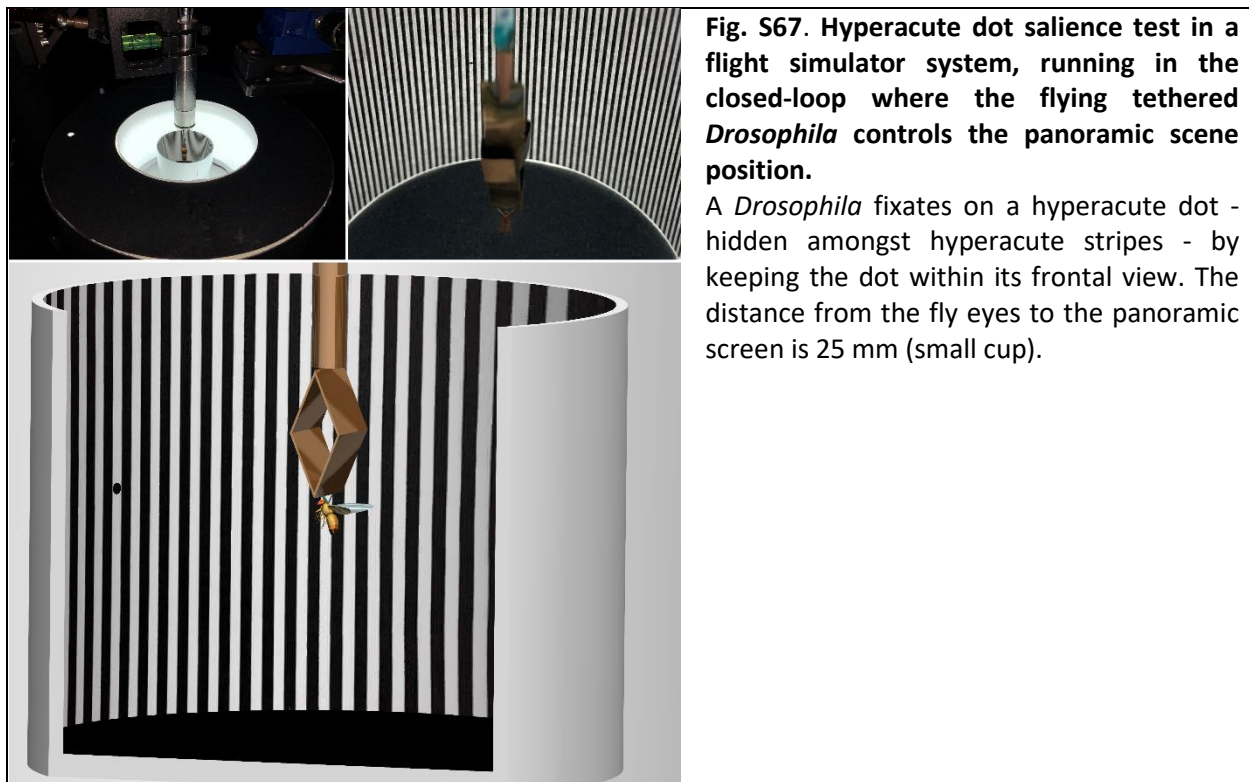

**Fig. S67. Hyperacute dot saliency test in a flight simulator system, running in the closed-loop where the flying tethered *Drosophila* controls the panoramic scene position.**

A *Drosophila* fixates on a hyperacute dot - hidden amongst hyperacute stripes - by keeping the dot within its frontal view. The distance from the fly eyes to the panoramic screen is 25 mm (small cup).

### Testing hyperacute vision by salient 2D- and 3D-objects

We presented different combinations of hyperacute objects at three different positions to test whether *Drosophila* saw hyperacute ( $<4.5^\circ$  inter-ommatidial angle) stimuli at 25 mm from the eyes (the small cup).

- First, we tested visual behavior to a small black 2D-dot ( $0.98^\circ$ ) hid within a hyperacute panoramic stripe scene (with  $1.17^\circ$  inter-black-bar-distances) (**fig. S67**). The dot was either at the scene center ( $0^\circ$ ), left ( $-90^\circ$ ), or right ( $90^\circ$ ) relative to the paper seam. The control stripe scene lacked the dot. We recorded 8 minutes of tethered flight for each case,

measuring at each millisecond the panoramic position the fly was facing (or fixating). Each fly's orientation behavior (relative fixation) over the panoramic scene was then given as probability.

- Second, we tested visual behavior to three black dots ( $3.9^\circ \text{Ø}$ ) on a white  $360^\circ$  background; The dots were at the center ( $0^\circ$ ), left ( $-90^\circ$ ), and right ( $90^\circ$ ). One of them had a small black 3D-pin (4 mm long) center ( $2.7^\circ \text{Ø}$ ) (**fig. S68**). Even for a single human eye, all the dots looked the same (no clear contrast difference; **fig. S68B** and **C**). Thus, to see the 3D-pin dot, a fly must have stereo vision. For each fly ( $n = 20$ ), we tested all three pin-positions and a blank-control white scene separately, one after another. In each of these four experiments, conducted in a random order, we recorded 8 minutes of tethered flight, continuously measuring the fly's fixation positions. Fixation over the  $360^\circ$  scene was then given as probability. **fig. S69** shows an example of how five single flies performed in these separate experiments.

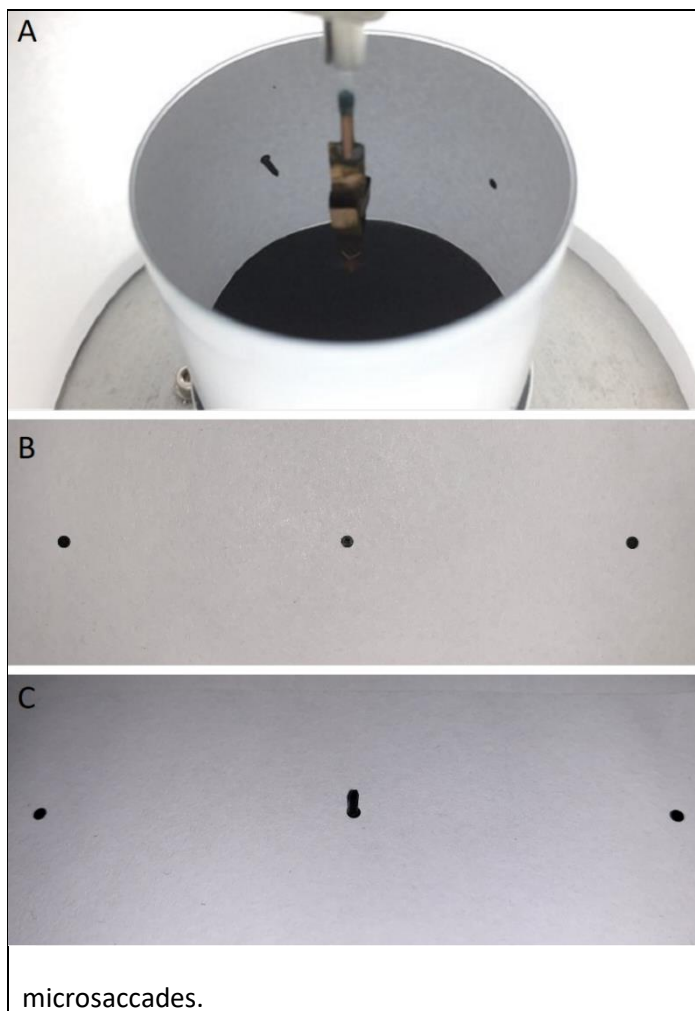

**Fig. S68.** Testing visual salience of hyperacute 3D-pin vs. 2D-dots in closed-loop settings.

(A) The stimulus configuration in the visual salience paradigm. In the experiments, a fly saw a hyperacute black pin and two hyperacute back dots  $90^\circ$  apart, and we measured its fixation probability of the whole  $360^\circ$  visual scene.

(B) Two  $3^\circ \text{Ø}$  black dots (on the side) and a central black pin on the white paper background as used in the visual salience experiments. When viewed monocularly at the center of the image – parallel to the pin's long axis – the center bin is very difficult to resolve, even for the human eye.

(C) The black pin is visible binocularly and becomes apparent monocularly if the viewer moves sideways, as this camera image shows. However, because the fly head is immobile, clamped to the torque-meter at the center of the panorama, and cannot approach the pin or move sideways to generate motion parallax, it can only see the pin through dynamic stereopsis, sampled by mirror-symmetric photomechanical photoreceptor

microsaccades.

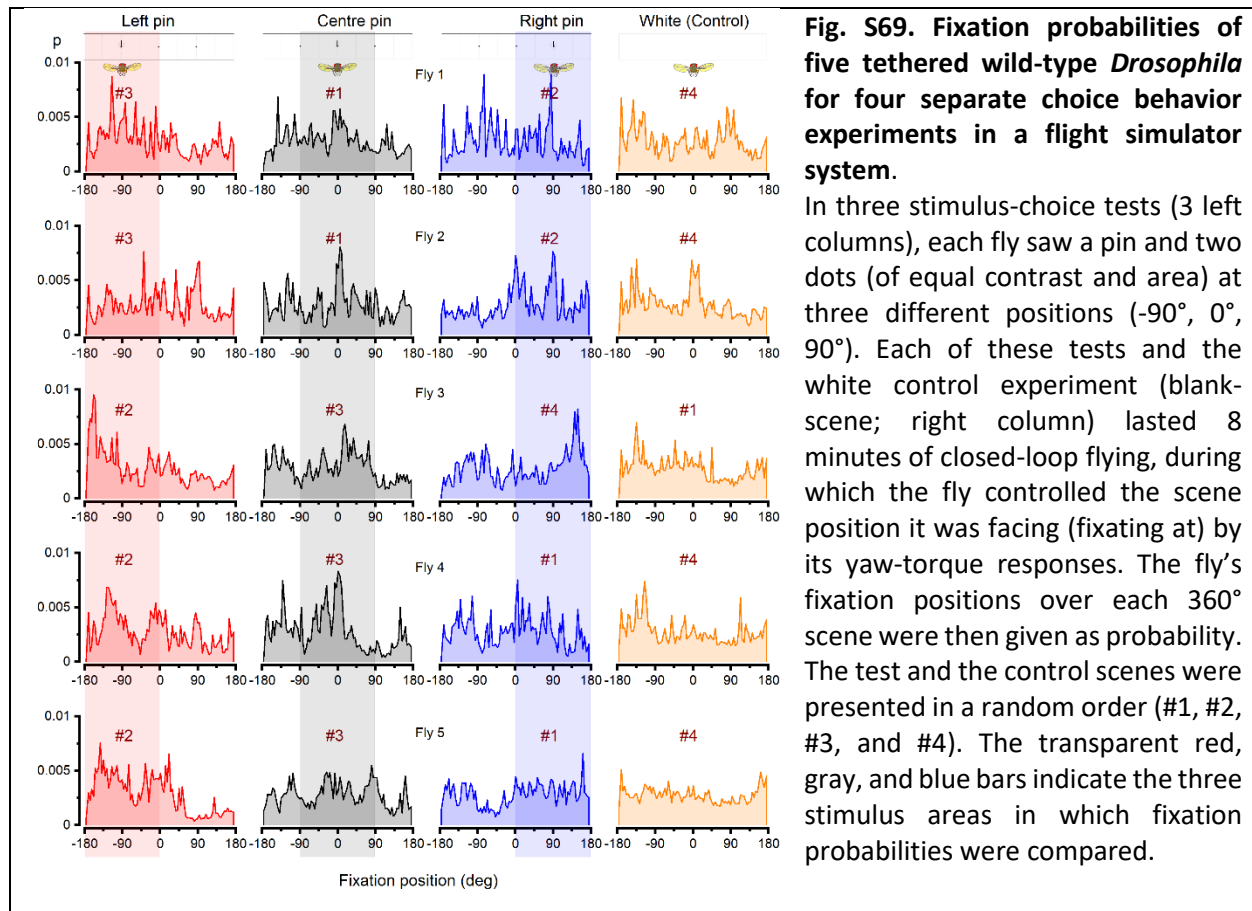

**Fig. S69. Fixation probabilities of five tethered wild-type *Drosophila* for four separate choice behavior experiments in a flight simulator system.**

In three stimulus-choice tests (3 left columns), each fly saw a pin and two dots (of equal contrast and area) at three different positions (-90°, 0°, 90°). Each of these tests and the white control experiment (blank-scene; right column) lasted 8 minutes of closed-loop flying, during which the fly controlled the scene position it was facing (fixating at) by its yaw-torque responses. The fly's fixation positions over each 360° scene were then given as probability. The test and the control scenes were presented in a random order (#1, #2, #3, and #4). The transparent red, gray, and blue bars indicate the three stimulus areas in which fixation probabilities were compared.

**Saliency analysis.** We hypothesized that:

- H1.** A fly finds a hyperacute 3D-pin (attractor) more salient than two competing hyperacute 2D-dots (distractors).
- H2.** A fly finds and fixates (is attracted) to a hyperacute 2D-dot hidden amongst hyperacute stripes.

For testing either of these hypotheses, each fly performed four consecutive experiments in random order (**H1: Fig. 6C** and **H2: Fig. 6H**). Three of the experiments quantified a fly's probability density function for viewing (fixating on) the main attractor (**H1: black pin; H2: black dot**) when it was placed in the left (-90°), middle (0°), or right (90°), while the black dots (competing distractors) occupied the other two positions (**H1**) or the whole scene contained hyperacute stripes (**H2**) (**fig. S69, H1: left position, red; middle, gray; right, blue**). The fourth (control) experiment (**fig. S69, H1: orange**) quantified each fly's *intrinsic-fixation probability density function* in exploring the homogeneous 360° background; either a white (**H1**) or stripe scene (**H2**). The *intrinsic fixation probability density function* can reveal additional visual or sensory cues in the flight simulator system that could systematically bias the fly behavior during the saliency tests. For an unbiased flight simulator system, this function should be flat over the 360° scene, as calculated using the whole tested fly population.

For comparing the flies' fixation probabilities of the three (left, middle, and right) attractor position, we:

- Calculated each fly’s unbiased fixation probability density function for each tested attractor position. These functions were obtained by subtracting the fly population’s mean *intrinsic-fixation probability density function* (n = 20 flies) from each fly’s fixation probability density function for each attractor experiment.
- Calculated the fly populations’ mean fixation probability density function (n = 20 flies) for the left, middle and right attractors (**H1: Fig. 6D** and **H2: Fig. 6I**).
- Calculated each flies’ fixation probability for the three attractor positions, using 180°-scene-sections with 90° section overlaps. This procedure gave each fly three mean fixation probabilities for each attractor experiment: one for the attractor (**H1: pin; H2: dot with stripes**) position and two for the competing distractors (**H1: dot; H2: stripes alone**) positions. Thus together, each fly’s three attractor experiments (left, middle, and right) gave us nine mean fixation probabilities.
- Pooled all tested flies’ (n = 20) mean fixation probabilities for the left, middle and right attractor positions into the corresponding nine groups and performed their statistical mean comparisons (**H1: Fig. 6E; H2: Fig. 6J**).

With each group not being tested against itself, we obtained 24 relevant mean probability comparisons (**Table S7-S10**) for testing statistically two questions related to **H1** and **H2**, using one-way ANOVA:

- Q1.** Is a fly’s fixation probability at any one of the three attractor positions (say, the left position) higher when the attractor is there (the pin is at left) in comparison when it is in one of the other positions (the pin is at right or middle) (**H1: Fig. 6E**, the row above)?
- Q2.** In each experiment, is a fly’s fixation probability for the attractor (say, the left-pin) higher than its probability to fixate at the distractors (middle- and right-dots) (**H1: Fig. 6E**, the row below)?

| <b>Table S7. For each test position, is the flies’ fixation probability higher when occupied by a pin-attractor?</b> |                                    |                                    |                                    |
|----------------------------------------------------------------------------------------------------------------------|------------------------------------|------------------------------------|------------------------------------|
| (one-way ANOVA statistics)                                                                                           |                                    |                                    |                                    |
| <b>Testing Q1 (pin vs dot in the same position)</b>                                                                  | <b>Left-pin (attractor) vs</b>     | <b>Middle-pin (attractor) vs</b>   | <b>Right-pin (attractor) vs</b>    |
| Left-dot (distractor) (when Middle-pin)                                                                              | P = 6.590 x 10 <sup>-3</sup> (**)  |                                    |                                    |
| Left-dot (distractor) (when Right-pin)                                                                               | P = 5.623 x 10 <sup>-8</sup> (***) |                                    |                                    |
| Middle-dot (distractor) (when Left-pin)                                                                              |                                    | P = 7.422 x 10 <sup>-5</sup> (***) |                                    |
| Middle-dot (distractor) (when Right-pin)                                                                             |                                    | P = 1.593 x 10 <sup>-2</sup> (*)   |                                    |
| Right-dot (when Left-pin)                                                                                            |                                    |                                    | P = 5.055 x 10 <sup>-8</sup> (***) |
| Right-dot (when Middle-pin)                                                                                          |                                    |                                    | P = 1.402 x 10 <sup>-2</sup> (*)   |

| <b>Table S8. Do the flies fixate more at a pin-attractor than the competing dot-distractors?</b> |
|--------------------------------------------------------------------------------------------------|
| (one-way ANOVA statistics)                                                                       |

| Testing Q2 (pin vs two dots) | Left-pin (attractor)<br>vs         | Middle-pin (attractor)<br>vs       | Right-pin (attractor)<br>vs         |
|------------------------------|------------------------------------|------------------------------------|-------------------------------------|
| Middle-dot (distractor)      | P = 0.082 (ns)                     |                                    |                                     |
| Right-dot (distractor)       | P = 2.653 x 10 <sup>-4</sup> (***) |                                    |                                     |
| Left-dot (distractor)        |                                    | P = 3.696 x 10 <sup>-6</sup> (***) |                                     |
| Right-dot (distractor)       |                                    | P = 3.720 x 10 <sup>-3</sup> (**)  |                                     |
| Left-dot (distractor)        |                                    |                                    | P = 2.845 x 10 <sup>-13</sup> (***) |
| Middle-dot (distractor)      |                                    |                                    | P = 0.064 (ns)                      |

**Table S9. For each test position, is the flies' fixation probability higher when occupied by a dot-attractor?**  
(one-way ANOVA statistics)

| Testing Q1 (dot-position vs stripe background) | Left-dot<br>vs                     | Middle-dot<br>vs                  | Right-dot<br>vs                    |
|------------------------------------------------|------------------------------------|-----------------------------------|------------------------------------|
| Left-stripe<br>(when Middle-dot)               | P = 1.720 x 10 <sup>-3</sup> (**)  |                                   |                                    |
| Left-stripe<br>(when Right-dot)                | P = 7.035 x 10 <sup>-5</sup> (***) |                                   |                                    |
| Middle-stripe<br>(when Left-dot)               |                                    | P = 5.240 x 10 <sup>-3</sup> (**) |                                    |
| Middle-stripe<br>(when Right-dot)              |                                    | P = 7.890 x 10 <sup>-3</sup> (**) |                                    |
| Right-stripe<br>(when Left-dot)                |                                    |                                   | P = 2.627 x 10 <sup>-5</sup> (***) |
| Right-stripe<br>(when Middle-dot)              |                                    |                                   | P = 0.655 (ns)                     |

**Table. S10. Do the flies fixate more at a dot-attractor than the competing background?**  
(one-way ANOVA statistics)

| Testing Q2 (dot-attraction vs stripe background) | Left-position (Left-dot)<br>vs     | Middle-position (Middle-dot) vs      | Right-position (Right-dot)<br>vs   |
|--------------------------------------------------|------------------------------------|--------------------------------------|------------------------------------|
| Middle-position (Left-dot)                       | P = 0.351 (ns)                     |                                      |                                    |
| Right-position (Left-dot)                        | P = 5.952 x 10 <sup>-6</sup> (***) |                                      |                                    |
| Left-position (Middle-dot)                       |                                    | P = 1.09728 x 10 <sup>-5</sup> (***) |                                    |
| Right-position (Middle-dot)                      |                                    | P = 5.090 x 10 <sup>-3</sup> (**)    |                                    |
| Left-position (Right-dot)                        |                                    |                                      | P = 3.803 x 10 <sup>-4</sup> (***) |
| Middle-position (Right-dot)                      |                                    |                                      | P = 0.920 (ns)                     |

## VI.6. Learning experiments (closed-loop)

The avoidance associative learning experiment was automatized and recorded in 1 ms time resolution in the PC's hard-drive. The experiment consisted of a sequence of 9 blocks of 2-min duration each. During the first two blocks, the fly adapted to the flight simulator conditions without heat punishment. During training (light gray blocks in **Fig. 6K-P** and **fig. S70**), infrared laser light (heat) to the fly head was turned on (or off) by the computer, depending on the fly's flight direction choice for the visual patterns at the arena wall. Under software control, the panorama was sectioned into four 90° quadrants, with each having its pattern (either test or control) in its center. Identical patterns were placed in opposite quadrants. Whenever the fly's longitudinal body axis crossed one of the panorama's invisible quadrant-boundaries, heat (unconditioned stimulus, US) was turned either on or off. An infrared laser delivered the heat-punishment (825 nm, 150 mW), directed (using a piezo 3-axis micromanipulator; Sensapex, Finland) from the front and above onto the fly's head and thorax. This heat-punishment (unconditioned stimulus, US) led to significant visual avoidance learning of the visual patterns.

Between every 2 min block, the panorama was span both clockwise and counterclockwise with a random duration that lasted for 5 s. This maneuver randomized the starting scene position for each block in respect to the fly head.

We tested both binocular (normal eyes) and monocular (either the left or right frontal eye section painted with non-toxic black acrylic paint: Winsor & Newton, Winton Oil Colour, Ivory Black – 1414331) avoidance learning. The eye was painted immediately before tethering (to the flight simulator from the copper-wire hook between the head and thorax), followed by instantly testing the fly. This procedure reduced the fly disrupting the paint coverage over their eye by attempting to rub the paint with their legs. However, many flies were able and willing to fly immediately after tethering, with minimum observable discomfort attributable to the paint. Only flies that did not repeatedly attempt to remove the paint from their eye were included in the dataset. In these experiments, we measured the *Drosophila* learning performance index (PI) for the following patterns (3D hyperacute object pairs of equal gamma-corrected contrast and size):

- A black 3D-pin at a black dot center vs. a black 2D-dot
- A black 3D-pin at a black vertical 2D-stripe center vs. a black vertical 2D-stripe (3.9° width)

As a control experiment, we measured both binocular and monocular learning performance indexes for the classic large 2D T vs. L objects (symbols), with each being 40° (height) × 40° (width) with 10° bar width. This base-metric was then compared to the corresponding hyperacute 3D learning performance indexes.

### **Measuring associative learning of hyperacute 3D-objects**

A *Drosophila* controlled the panorama, which showed two opposing test objects (*e.g.*, black dots with a black center-pin, called 3D-dots) and orthogonally to them two control objects (*e.g.*, black dots, called 2D-dots). For each 18-min-long experiment, we calculated PI for each of its 2-min-blocks: as the time (in seconds) the fly selected to face CS+ (the heat-punishment associated object; the conditioned stimulus) minus the time the fly selected to face CS- (the neutral object; the non-conditioned stimulus) divided by the total time.

Because the flies learned to avoid either one of the tested objects (during the last two blocks: short-term learning:  $PI > 0.2$ ), as quantified after two bouts of training (*i.e.*, teaching) with heat-punishment (high avoidance, performance index,  $PI > 0.8$ ), they must have seen the small 3D differences between the objects, as required for hyperacute stereopsis. Importantly, *Drosophila* learned similarly well (blue:  $PI > 0.2$ ) in the classic T vs. L paradigm.

For each genotype, we tested the flies' learning performance for all the predetermined test objects. *E.g.*, in one-half of the 3D-pin vs. 2D-dot experiments, the heat-punishment was associated with the 3D-pin (10/20 wild-type flies) and in the other half with the 2D-dot (10/20 flies). Predictably, as learning required distinguishing (seeing) the two patterns as different, the flies learned to avoid 3D-pin and 2D-dot equally well, with similar PIs - and the data were pooled.

The two rims, joining the paper strip's short ends, caused a faint narrow seam ( $\sim 0.1^\circ$ ) in the white background panorama. However, this seam did not affect *Drosophila* visual object learning; *i.e.*, the flies did not use it as a positional learning cue. We kept the same paper strips in both binocular and monocular (one eye painted black) experiments as the tested hyperacute 2D and 3D objects' backgrounds. Therefore, if the flies were to use the seam as a visual learning cue, both binocular and monocular flies would have shown a positive learning performance index. However, because only the binocular flies learned to avoid the hyperacute 2D and 3D objects - **fig. S70A**: the row above (binocular) vs. the row below (monocular), the seam had no role in the measured learning performances, and the flies used stereo vision to differentiate and memorize the tested objects.

Interestingly, after the first object training (after the 3<sup>th</sup>-4<sup>th</sup> block heat-avoidance training spout), many flies (**fig. S70**) showed small but insignificant PI, indicating that the 1<sup>st</sup> teaching spout caused only a transient change in their behavioral choices. This finding is consistent with the theory of dynamic learning. To improve survival, animals would need to continually question the learned information as the world is not static but changes continuously. In other words, it would be beneficial to check whether a recently seen predator was still there rather than believe that nothing had changed, and if the predator had moved (was no longer there), then change the behavior. Similarly, our data suggest that after the 1<sup>st</sup> teaching spout, the flies soon changed their behavior (in respect to their avoidance PI during training), as if to check whether they would be still heat-punished when looking at the object. And since the punishment no longer occurred, they could actively forget the learned association between the tested object and the heat-punishment. However, in clear contrast, the 2<sup>nd</sup> heat-punishment teaching spout caused a highly significant and longer-lasting object avoidance in the flies' behavioral choice (**fig. S70** and **Table S11-S14**).

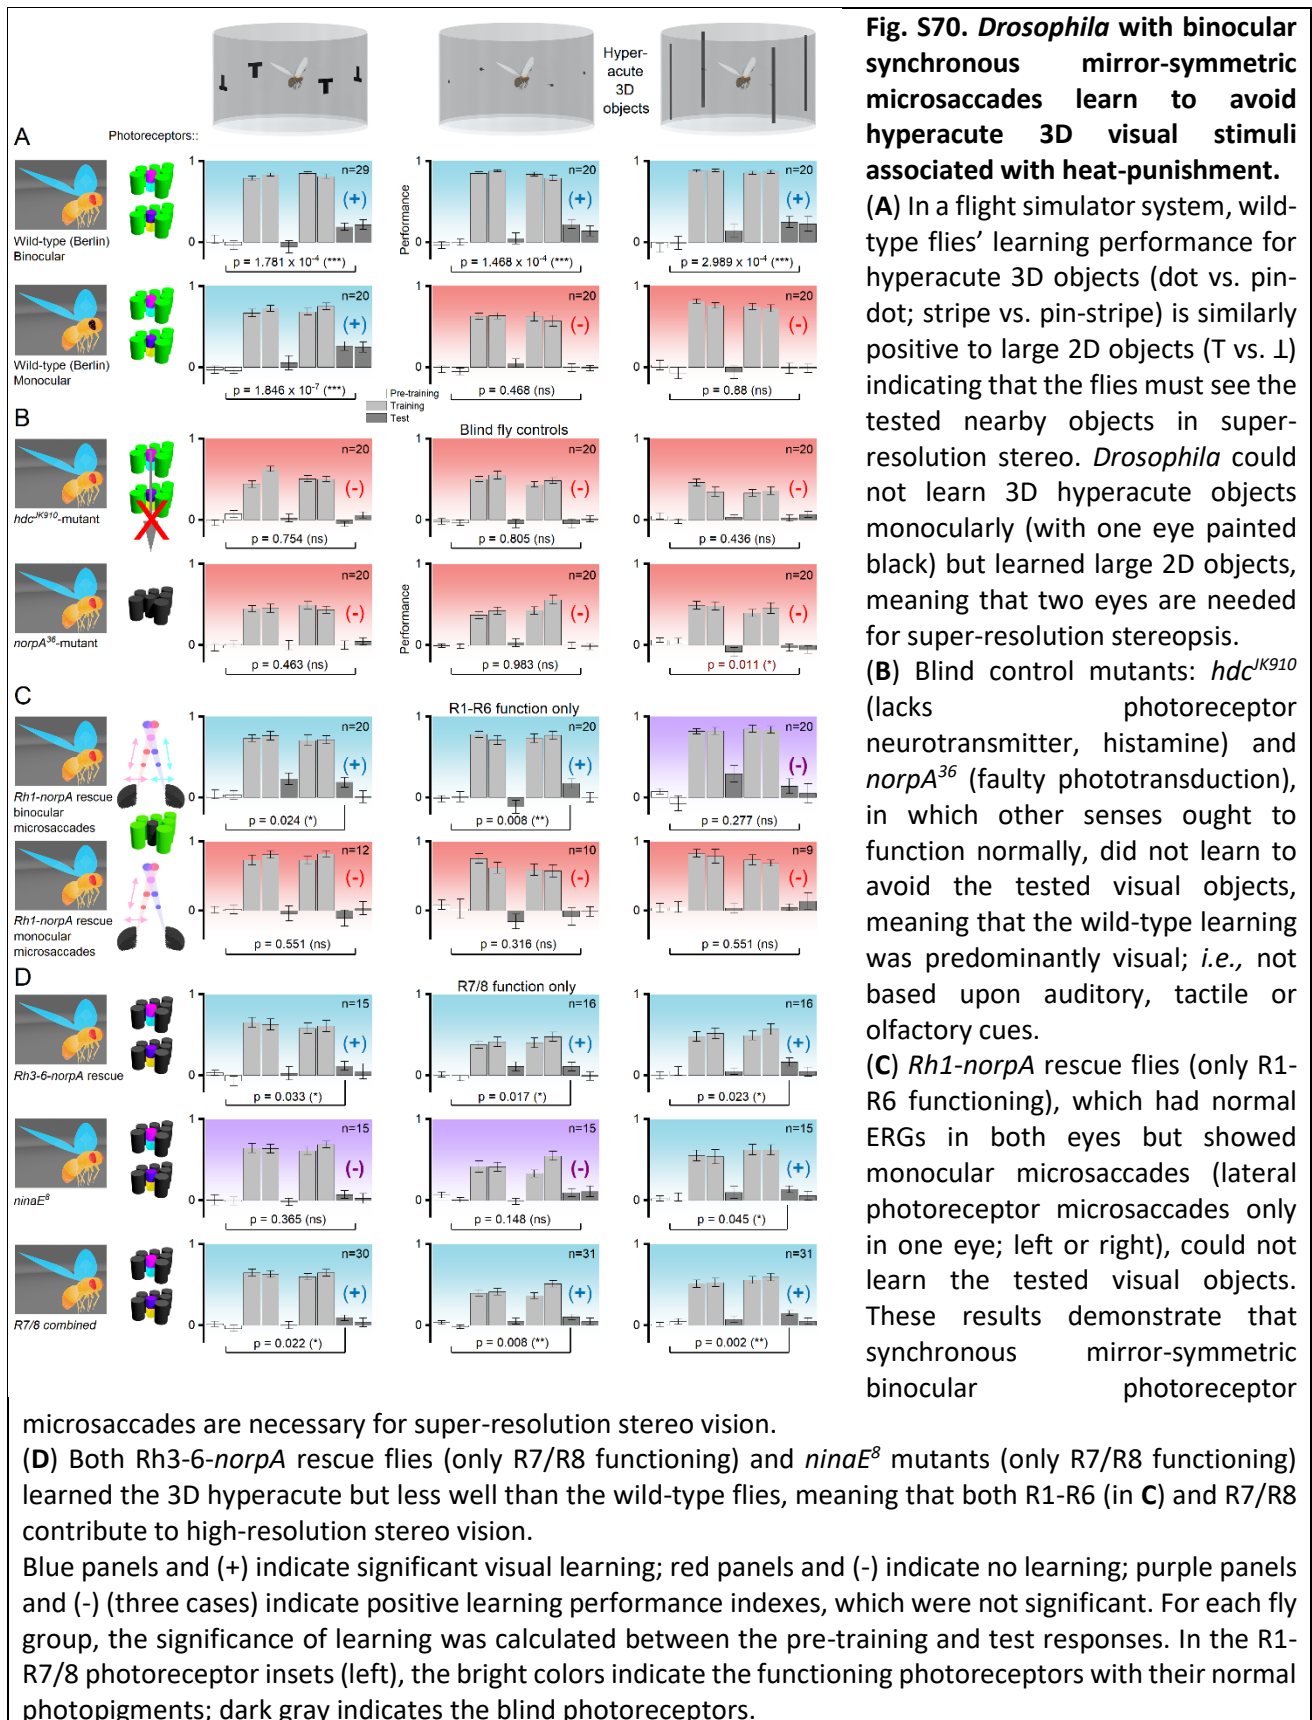



**Table S11**

| Wild-type                             | Stages 1 and 2 (naïve) vs<br>Stage 8                                     |                                                                          |                                                                          | Stages 1 and 2 (naïve) vs<br>Stages 8 and 9                              |                                                                          |                                                                          |
|---------------------------------------|--------------------------------------------------------------------------|--------------------------------------------------------------------------|--------------------------------------------------------------------------|--------------------------------------------------------------------------|--------------------------------------------------------------------------|--------------------------------------------------------------------------|
|                                       | Stimuli                                                                  | T-patterns                                                               | 3D Dots                                                                  | 3D Stripes                                                               | T-patterns                                                               | 3D Dots                                                                  |
| <b>Binocular PI</b> (Mean ± SD)       | 0.188 ± 0.244<br>N = 29<br>P = 2.56 x 10 <sup>-3</sup> (**<br>avoided)   | 0.219 ± 0.229<br>N = 20<br>P = 4.35 x 10 <sup>-5</sup> (***)<br>avoided) | 0.246 ± 0.306<br>N = 20<br>P = 9.57 x 10 <sup>-4</sup> (***)<br>avoided) | 0.201 ± 0.283<br>N = 29<br>P = 1.78 x 10 <sup>-4</sup> (***)<br>avoided) | 0.178 ± 0.258<br>N = 20<br>P = 1.47 x 10 <sup>-4</sup> (***)<br>avoided) | 0.235 ± 0.352<br>N = 20<br>P = 2.99 x 10 <sup>-4</sup> (***)<br>avoided) |
| <b>Monocular PI</b> (one eye blocked) | 0.260 ± 0.248<br>N = 20<br>P = 3.06 x 10 <sup>-6</sup> (***)<br>avoided) | -0.008 ± 0.212<br>N = 20<br>P = 0.54<br>(ns)                             | -0.016 ± 0.277<br>N = 20<br>P = 0.91<br>(ns)                             | 0.253 ± 0.260<br>N = 20<br>P = 1.85 x 10 <sup>-7</sup> (***)<br>avoided) | -0.011 ± 0.183<br>N = 20<br>P = 0.47<br>(ns)                             | -0.015 ± 0.253<br>N = 20<br>P = 0.88<br>(ns)                             |

**Table S12**

| R1-R6 function                                            | Stages 1 and 2 (naïve) vs<br>Stage 8                                  |                                                                        |                                              | Stages 1 and 2 (naïve) vs<br>Stages 8 and 9   |                                               |                                              |
|-----------------------------------------------------------|-----------------------------------------------------------------------|------------------------------------------------------------------------|----------------------------------------------|-----------------------------------------------|-----------------------------------------------|----------------------------------------------|
|                                                           | Stimuli                                                               | T-patterns                                                             | 3D Dots                                      | 3D Stripes                                    | T-patterns                                    | 3D Dots                                      |
| <b>norPA Rh1 rescue Binocular Saccades PI</b> (Mean ± SD) | 0.187 ± 0.268<br>N = 20<br>P = 2.42 x 10 <sup>-2</sup> (*<br>avoided) | 0.172 ± 0.240<br>N = 20<br>P = 7.75 x 10 <sup>-3</sup> (**<br>avoided) | 0.138 ± 0.407<br>N = 20<br>P = 0.141<br>(ns) | 0.098 ± 0.311<br>N = 20<br>P = 0.286<br>(ns)  | 0.086 ± 0.263<br>N = 20<br>P = 0.105<br>(ns)  | 0.094 ± 0.466<br>N = 20<br>P = 0.277<br>(ns) |
| <b>Monocular Saccades PI</b>                              | -0.104 ± 0.389<br>N = 12<br>P = 0.214<br>(ns)                         | -0.084 ± 0.394<br>N = 10<br>P = 0.315<br>(ns)                          | 0.05 ± 0.148<br>N = 9<br>P = 0.968<br>(ns)   | -0.032 ± 0.360<br>N = 12<br>P = 0.551<br>(ns) | -0.047 ± 0.311<br>N = 10<br>P = 0.316<br>(ns) | 0.095 ± 0.268<br>N = 9<br>P = 0.551<br>(ns)  |

**Table S13**

| R7/8 function                           | Stages 1 and 2 (naïve) vs<br>Stage 8         |                                              |                                                                       | Stages 1 and 2 (naïve) vs<br>Stages 8 and 9  |                                              |                                              |
|-----------------------------------------|----------------------------------------------|----------------------------------------------|-----------------------------------------------------------------------|----------------------------------------------|----------------------------------------------|----------------------------------------------|
|                                         | Stimuli                                      | T-patterns                                   | 3D Dots                                                               | 3D Stripes                                   | T-patterns                                   | 3D Dots                                      |
| <b>ninaE<sup>8</sup> PI</b> (Mean ± SD) | 0.069 ± 0.187<br>N = 15<br>P = 0.272<br>(ns) | 0.095 ± 0.194<br>N = 15<br>P = 0.205<br>(ns) | 0.135 ± 0.160<br>N = 15<br>P = 4.46 x 10 <sup>-2</sup> (*<br>avoided) | 0.046 ± 0.208<br>N = 15<br>P = 0.365<br>(ns) | 0.102 ± 0.226<br>N = 15<br>P = 0.148<br>(ns) | 0.096 ± 0.194<br>N = 15<br>P = 0.163<br>(ns) |
| <b>norPA Rh3-6 rescue PI</b>            | 0.115 ± 0.208<br>N = 15                      | 0.108 ± 0.214<br>N = 16                      | 0.163 ± 0.202<br>N = 16                                               | 0.082 ± 0.293<br>N = 15                      | 0.048 ± 0.214<br>N = 16                      | 0.105 ± 0.219<br>N = 16                      |

|                        |                                                                             |                                                                              |                                                                              |                                                                   |                                                                             |                                                                             |
|------------------------|-----------------------------------------------------------------------------|------------------------------------------------------------------------------|------------------------------------------------------------------------------|-------------------------------------------------------------------|-----------------------------------------------------------------------------|-----------------------------------------------------------------------------|
|                        | P = 3.32 x<br>10 <sup>-2</sup> (*<br>avoided)                               | P = 1.66 x<br>10 <sup>-2</sup> (*<br>avoided)                                | P = 2.29 x<br>10 <sup>-2</sup> (*<br>avoided)                                | P = 0.116<br>(ns)                                                 | P = 0.161<br>(ns)                                                           | P = 0.123<br>(ns)                                                           |
| <b>Combined<br/>PI</b> | 0.092 ±<br>0.196<br>N = 30<br>P = 2.18 x<br>10 <sup>-2</sup> (*<br>avoided) | 0.101 ±<br>0.201<br>N = 31<br>P = 8.06 x<br>10 <sup>-3</sup> (**<br>avoided) | 0.150 ±<br>0.180<br>N = 31<br>P = 2.13 x<br>10 <sup>-3</sup> (**<br>avoided) | 0.064 ±<br>0.252<br>N = 30<br>P = 7.16 x<br>10 <sup>-2</sup> (ns) | 0.074 ±<br>0.219<br>N = 31<br>P = 4.39 x<br>10 <sup>-2</sup> (*<br>avoided) | 0.102 ±<br>0.205<br>N = 31<br>P = 3.60 x<br>10 <sup>-2</sup> (*<br>avoided) |

**Table S14**

| Blind<br>mutants                                 | Stages 1 and 2 (naïve) vs<br>Stage 8             |                                                  |                                                               | Stages 1 and 2 (naïve) vs<br>Stages 8 and 9     |                                                  |                                                                |
|--------------------------------------------------|--------------------------------------------------|--------------------------------------------------|---------------------------------------------------------------|-------------------------------------------------|--------------------------------------------------|----------------------------------------------------------------|
|                                                  | T-patterns                                       | 3D Dots                                          | 3D Stripes                                                    | T-patterns                                      | 3D Dots                                          | 3D Stripes                                                     |
| <i>hdc</i> <sup>JK910</sup><br>PI (Mean ±<br>SD) | -0.053 ±<br>0.142<br>N = 20<br>P = 0.151<br>(ns) | -0.048 ±<br>0.259<br>N = 20<br>P = 0.841<br>(ns) | 0.019 ±<br>0.172<br>N = 20<br>P = 0.903<br>(ns)               | 0.002 ±<br>0.164<br>N = 20<br>P = 0.754<br>(ns) | -0.019 ±<br>0.214<br>N = 20<br>P = 0.618<br>(ns) | 0.042 ±<br>0.168<br>N = 20<br>P = 0.436<br>(ns)                |
| <i>norpa</i><br>PI                               | -0.002 ±<br>0.240<br>N = 20<br>P = 0.874<br>(ns) | -0.002<br>±0.174<br>N = 20<br>P = 0.790<br>(ns)  | -0.032 ±<br>0.206<br>N = 20<br>P = 0.051<br>(~*<br>attracted) | 0.022 ±<br>0.221<br>N = 20<br>P = 0.463<br>(ns) | -0.012 ±<br>0.168<br>N = 20<br>P = 0.983<br>(ns) | -0.045 ±<br>0.204<br>N = 20<br>P = 0.01083<br>(*<br>attracted) |

| Heat punishment avoidance learning performance index (PI) scale |                    |                      |                      |                   |                     |             |
|-----------------------------------------------------------------|--------------------|----------------------|----------------------|-------------------|---------------------|-------------|
| PI > 0.1                                                        | 0.1 > PI ><br>0.08 | 0.075 > PI ><br>0.05 | 0.05 > Pi ><br>0.025 | 0.025 > Pi ><br>0 | 0 > PI > -<br>0.025 | -0.025 > PI |

Clear avoidance

Slight avoidance

Random

Slight attraction

**Choosing a heat-punishment direction.** We further found that the heat-punishment direction and the fly's body location receiving it - here, directed from the up-front to its head; see above - contributed to the flies' PI. In control experiments, in which the heat-punishment was directed from behind and above onto the fly's head and thorax, the learning performance indexes were somewhat higher, closely matching with the previous results (39, 117) using a similar delivery (**fig. S71**). Thus, suggestively, for the flies to form aversive object associations, targeting the heat-punishment to the head's back provides a more potent unconditioned stimulus than heat-punishment to the head's front. Nevertheless, in this study, we settled to the above-described tethering and frontal heat-punishment direction because it minimized the possibility of the flies seeing additional visual cues, such as the opening and closing of light-proof curtains and any experimenter activity during the experiments. Thus, this arrangement ensured that the obtained statistical differences between the different test and control experiments became undisputable within the given experimental settings and their limitations.

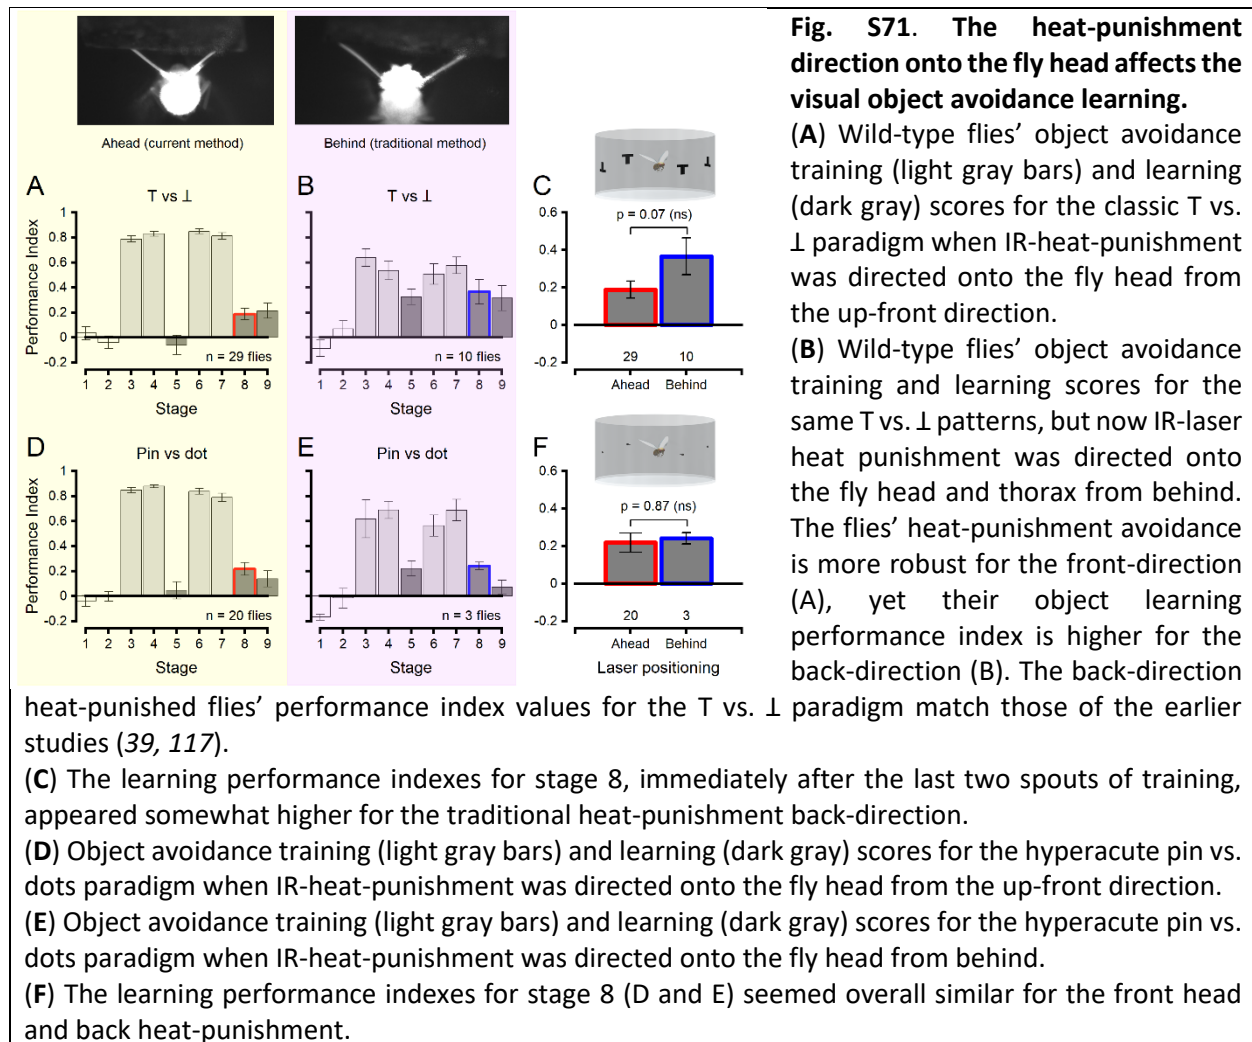

### Measuring associative learning of flies showing monocular photoreceptor microsaccades

Serendipitously, while collecting data for the different genotypes' photoreceptor microsaccade and electroretinogram (ERG) statistics (see **Section II.8.**, above), we found some **Rh1-norpA rescue flies** lacking the sideways-moving microsaccades in one of their eyes. And, intriguingly, since both of their eyes showed normal ERG responses, presumably, something must have gone wrong during the development of the mechanical linkages guiding the rhabdomeres lateral microsaccade movements in one of their eyes (see **Section II.4.**, above). We realized the importance of these flies, as they enabled us to test the role of mirror-symmetric microsaccades in stereopsis directly. To do this systematically, we established a 3-pronged experimental protocol (**multi-method paradigm**) for testing every **Rh1-norpA rescue fly**. The protocol included separate deep pseudopupil and ERG recordings of the flies' left and right eyes and flight-simulator learning experiments, all performed on the same day within about 2 hours. These combined experiments enabled us to identify:

- (i) Flies with normal R1-R6 phototransduction and binocular mirror-symmetric lateral photoreceptor microsaccades.
- (ii) Flies with normal phototransduction but monocular asymmetric lateral photoreceptor microsaccades.

(iii) Blind flies without photoreceptor microsaccades and flat ERGs.

Therefore, we could reliably link the **i-** and **ii-**grouped flies' hyperacute 3D object learning performance to their normal or faulty photoreceptor microsaccade function.

**Multi-method paradigm.** First, the flies were tethered and tested for associative avoidance learning with one of the three hyperacute 2D or 3D patterns in the flight simulator. Then, we generally unhooked the flies and fixated them on a pipette tip for faster and less error-prone handling, although few flies were tested tethered. In the deep pseudopupil setup, photoreceptor microsaccades were recorded to 200 ms green- or UV-flashes repeated 25 times every 2s for additional statistics. These recordings were performed from two fixed locations on the ventral left and right eyes:  $+28^\circ$  and  $-28^\circ$  horizontal rotations from the midline with constant  $-37^\circ$  vertical rotation from the antennae. Finally, we stimulated and recorded the ERG-responses approximately from the same locations where the microsaccades were imaged, although only the right eye was used for a minority of the flies. We measured the ERGs last to avoid any Ringer solution spillage on the fly-eye or minor damage from the eye-touching electrodes, both of which could have influenced the learning and the microsaccades. Further details of the ERG and deep pseudopupil recording methods are presented in **Section II.3.** and **Section II.1,** respectively. The details of the avoidance learning testing can be found in **Section VI.6.**

**Binocular microsaccades.** Initially, we assumed that the *Rh1-norpA* rescue would generate a homogenous group of flies with similar eyesight, but based on the photoreceptor microsaccades and the ERG-responses, these flies clustered into three groups with very distinctive visual capabilities (**fig. S72**). Most flies (~80%) showed binocular microsaccades (**fig. S72B**, green) and regular ERG-responses of approximately 3 mV with transient On- and Off-responses (**fig. S72C**, green). These flies could learn to avoid both the 2D (T vs. L) and the 3D (dot vs. pin-dot and stripe vs. pin-stripe) hyperacute testing patterns (**fig. S72A**, green). However, compared to the wild-type, the binocular *Rh1-norpA* flies' 3D avoidance learning performances seemed somewhat weaker. Nevertheless, the difference was not statistically significant (**Table S15-S19**, below) for any of the un-pooled or pooled patterns, demonstrating that normal binocular microsaccades are sufficient for hyperacute 2D/3D avoidance learning even without the functioning R7/8s.

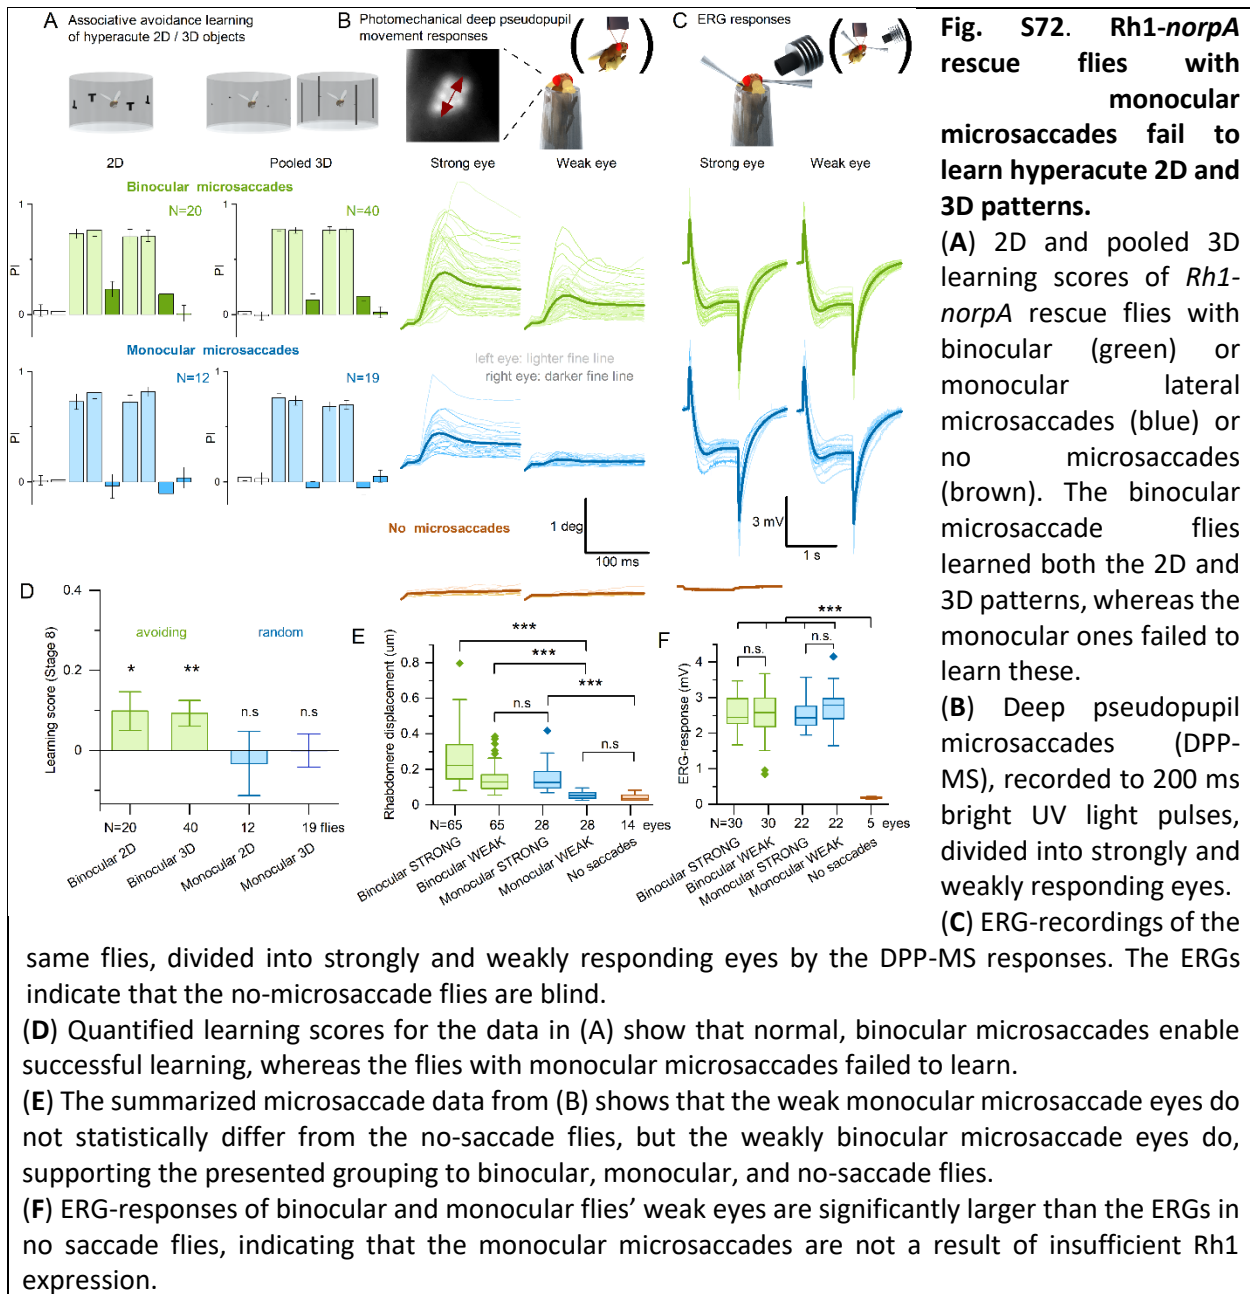

**Monocular microsaccades.** Besides the binocular microsaccade flies, about 10% of the randomly selected *Rh1-norpA* rescue flies showed monocular microsaccades (fig. S72B, blue) and normal ERGs (fig. S72C, blue). Interestingly, these flies could neither learn the 2D testing pattern nor the 3D patterns (fig. S72A, blue).

To acquire a sufficient number of these flies, we ran a preselection program where hundreds of *Rh1-norpA* rescue flies were first checked in the deep pseudopupil setup for their microsaccades, discarding the flies with binocular and no microsaccades while proceeding on with the monocular microsaccade flies. We classified the flies with one eye microsaccade movement smaller than one camera pixel as monocular because movements of this size or larger can be confidently

distinguished from the no-movement. To maximize the preselection throughput, we used the pipette-tip fixation method over the more time-consuming tethering. However, because the found monocular microsaccade flies were soon to be tethered for the flight simulator experiments, we only applied a small blob of barely-melting beeswax on the fly thorax – pipette tip interface, leaving the head free to move during the preselection. This single blob of wax was easily removed using tweezers if the fly turned out to have monocular microsaccades. After the flight simulator experiments, the deep pseudopupil and ERG recordings were performed as described earlier (see **Multi-method paradigm**, above). Unexpectedly, a total of 4 flies changed from showing monocular to binocular microsaccades between the preselection and the final pseudopupil recordings, potentially reflecting additional neural activity modulation from the fly brain (see microsaccade variability in **Section II.8.ii.**, above). Considering that these experiments were immensely onerous and that these four flies showed similar “no-learning” scores to the monocular flies, we decided to include them in the monocular group’s learning data.

**No microsaccades.** Besides the binocular and monocular microsaccades, we observed <10% of Rh1-*norpA* rescue flies with the total absence of microsaccades (**fig. S72B**, brown). Crucially, these flies were also unresponsive to both green- and UV-flashes in the ERG recordings (**fig. S72C**, brown), indicating that they were, indeed, blind. Because their blindness - but not the lack of microsaccades - would explain any discrepancies in the visual avoidance learning observed between the binocular and monocular microsaccade flies, we did not investigate these flies further, and their learning was not tested systematically. In this small minority of the Rh1-*norpA* rescue flies, the Rh1 expression presumably failed during the development.

Overall, our multi-method paradigm with Rh1-*norpA* rescue flies demonstrated that normal binocular photoreceptor microsaccades are necessary for hyperacute 2D/3D avoidance learning (**Fig. 6N-P** and **fig. S70C**). The monocular microsaccades almost certainly broke the spatiotemporal correlations between left and right eyes’ neural images, making visual learning difficult. Because the no-saccade-flies were blind, we could not examine if the total microsaccade absence affected the learning, but perhaps this can be probed in the future by genetic or pharmacological interventions. It appears, however, that the absolute photoreceptor microsaccade size predicts the flies’ learning on the population level (**fig. S73**), although other factors and differences between the groups are likely playing a role as well. Video-file showing examples of monocular microsaccades can be downloaded from:

[https://github.com/JuusolaLab/Hyperacute\\_Stereopsis\\_paper/tree/master/AnalyzeXrayData](https://github.com/JuusolaLab/Hyperacute_Stereopsis_paper/tree/master/AnalyzeXrayData)

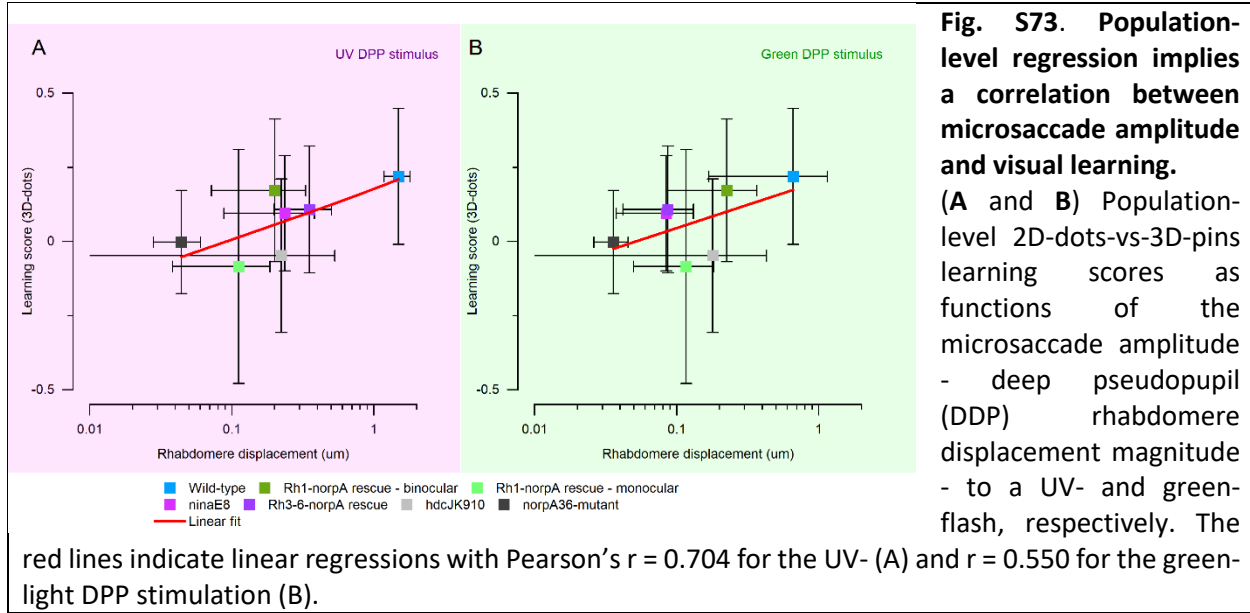

## VI.7. Comparable learning experiment statistics

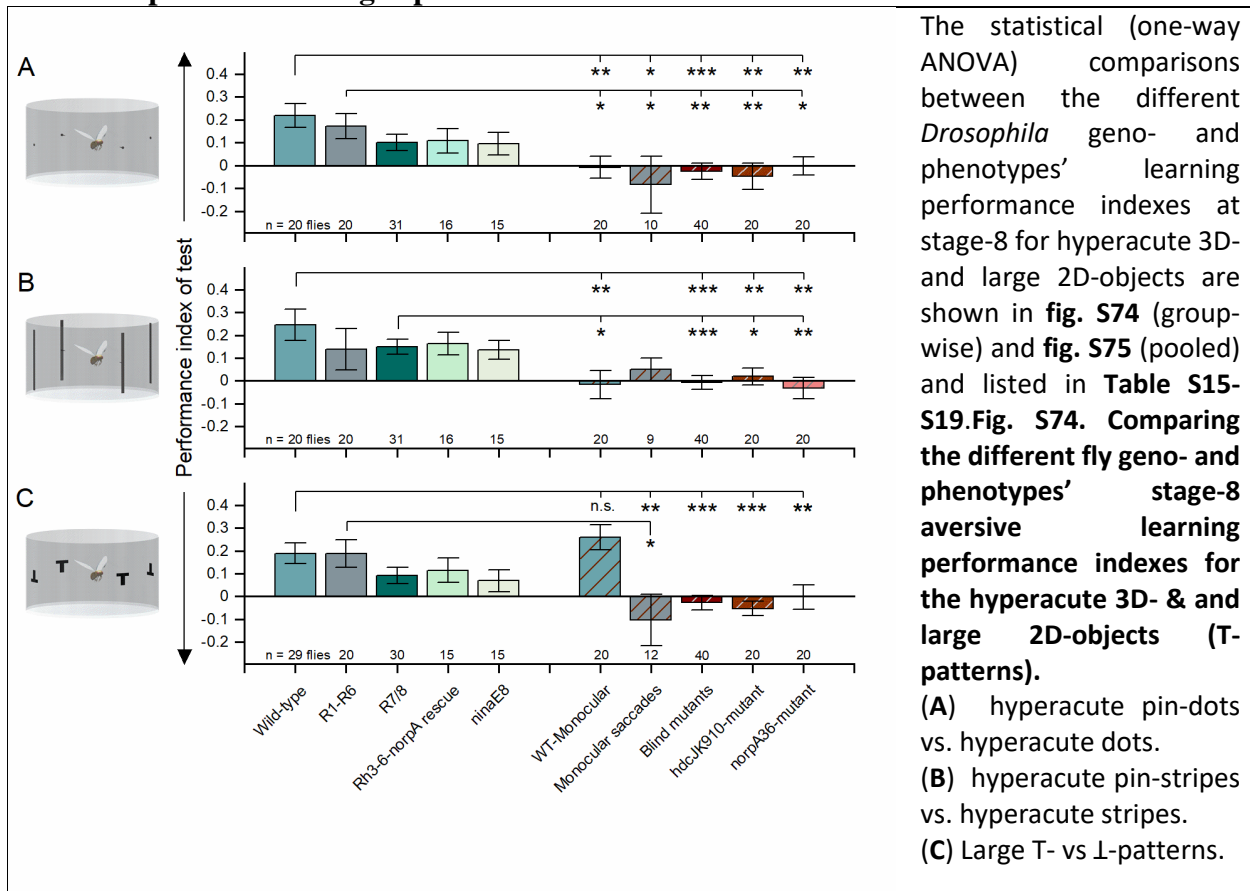

| Table S15                                  | Wild-type | <i>norpA</i> Rh1 rescue Binocular Saccades | R7/8 pooled    | <i>norpA</i> Rh3-6 rescue | <i>ninaE</i> <sup>8</sup> | WT Monocular (one eye blocked) | <i>norpA</i> Rh1 rescue Monocular Saccades | Blind pooled          | Blind <i>hdc</i> <sup>JK910</sup> | Blind <i>norpA</i> |
|--------------------------------------------|-----------|--------------------------------------------|----------------|---------------------------|---------------------------|--------------------------------|--------------------------------------------|-----------------------|-----------------------------------|--------------------|
| Wild-type                                  |           | P = 0.535 (ns)                             | P = 0.06 (ns)  | P = 0.146 (ns)            | P = 0.1 (ns)              | P = 0.002 (**)                 | P = 0.012 (*)                              | P = 1.77342 E-4 (***) | P = 0.00138 (**)                  | P = 0.0011 (**)    |
| <i>norpA</i> Rh1 rescue Binocular Saccades |           |                                            | P = 0.261 (ns) | P = 0.407 (ns)            | P = 0.313 (ns)            | P = 0.016 (*)                  | P = 0.035 (*)                              | P = 0.00231 (**)      | P = 0.00826 (**)                  | P = 0.012 (*)      |
| R7/8 pooled                                |           |                                            |                |                           |                           | P = 0.069 (ns)                 | P = 0.056 (ns)                             | P = 0.0147 (*)        | P = 0.025 (*)                     | P = 0.064 (ns)     |
| <i>norpA</i> Rh3-6 rescue                  |           |                                            |                |                           | P = 0.861 (ns)            | P = 0.114 (ns)                 | P = 0.12 (ns)                              | P = 0.044 (*)         | P = 0.062 (ns)                    | P = 0.098 (ns)     |
| <i>ninaE</i> <sup>8</sup>                  |           |                                            |                |                           |                           | P = 0.15 (ns)                  | P = 0.144 (ns)                             | P = 0.068 (ns)        | P = 0.083 (ns)                    | P = 0.129 (ns)     |
| WT Monocular (one eye blocked)             |           |                                            |                |                           |                           |                                | P = 0.495 (ns)                             | P = 0.773 (ns)        | P = 0.596 (ns)                    | P = 0.926 (ns)     |
| <i>norpA</i> Rh1 rescue Monocular Saccades |           |                                            |                |                           |                           |                                |                                            | P = 0.527 (ns)        | P = 0.767 (ns)                    | P = 0.433 (ns)     |
| Blind pooled                               |           |                                            |                |                           |                           |                                |                                            |                       |                                   |                    |
| Blind <i>hdc</i> <sup>JK910</sup>          |           |                                            |                |                           |                           |                                |                                            |                       |                                   | P = 0.516 (ns)     |
| Blind                                      |           |                                            |                |                           |                           |                                |                                            |                       |                                   |                    |



|              |  |  |  |  |  |  |  |  |  |  |
|--------------|--|--|--|--|--|--|--|--|--|--|
| <i>norpA</i> |  |  |  |  |  |  |  |  |  |  |
|--------------|--|--|--|--|--|--|--|--|--|--|

All tests were one-way ANOVA comparing two groups together.

| 3D Stripes                                 |           |                                            |                |                           |                           |                                |                                            |                                    |                                               |                                   |
|--------------------------------------------|-----------|--------------------------------------------|----------------|---------------------------|---------------------------|--------------------------------|--------------------------------------------|------------------------------------|-----------------------------------------------|-----------------------------------|
| Table S16                                  | Wild-type | <i>norpA</i> Rh1 rescue Binocular Saccades | R7/8 pooled    | <i>norpA</i> Rh3-6 rescue | <i>ninaE</i> <sup>8</sup> | WT Monocular (one eye blocked) | <i>norpA</i> Rh1 rescue Monocular Saccades | Blind pooled                       | Blind <i>hdc</i> <sup>JK9</sup> <sup>10</sup> | Blind <i>norpA</i>                |
| Wild-type                                  |           | P = 0.348 (ns)                             | P = 0.161 (ns) | P = 0.356 (ns)            | P = 0.210 (ns)            | P = 0.007 (**)                 | P = 0.079 (ns)                             | P = 2.118 x 10 <sup>-4</sup> (***) | P = 0.006 (**)                                | P = 1.690 x 10 <sup>-3</sup> (**) |
| <i>norpA</i> Rh1 rescue Binocular Saccades |           |                                            | P = 0.891 (ns) | P = 0.824 (ns)            | P = 0.98 (ns)             | P = 0.170 (ns)                 | P = 0.535 (ns)                             | P = 0.064 (ns)                     | P = 0.234 (ns)                                | P = 0.103 (ns)                    |
| R7/8 pooled                                |           |                                            |                |                           |                           | P = 0.013 (*)                  | P = 0.137 (ns)                             | P = 7.48372 E-4 (***)              | P = 0.013 (*)                                 | P = 1.700 x 10 <sup>-3</sup> (**) |
| <i>norpA</i> Rh3-6 rescue                  |           |                                            |                |                           | P = 0.676 (ns)            | P = 0.038 (*)                  | P = 0.154 (ns)                             | P = 0.004 (**)                     | P = 0.027 (*)                                 | P = 0.007 (**)                    |
| <i>ninaE</i> <sup>8</sup>                  |           |                                            |                |                           |                           | P = 0.068 (ns)                 | P = 0.205 (ns)                             | P = 0.013 (*)                      | P = 0.049 (*)                                 | P = 0.013 (*)                     |
| WT Monocular (one eye blocked)             |           |                                            |                |                           |                           |                                | P = 0.513 (ns)                             | P = 0.882 (ns)                     | P = 0.639 (ns)                                | P = 0.832 (ns)                    |
| <i>norpA</i> Rh1 rescue Monocular Saccades |           |                                            |                |                           |                           |                                |                                            | P = 0.407 (ns)                     | P = 0.644 (ns)                                | P = 0.294 (ns)                    |

|                                         |  |  |  |  |  |  |  |  |  |                |
|-----------------------------------------|--|--|--|--|--|--|--|--|--|----------------|
| <b>Blind pooled</b>                     |  |  |  |  |  |  |  |  |  |                |
| <b>Blind <i>hdc<sup>JK910</sup></i></b> |  |  |  |  |  |  |  |  |  | P = 0.400 (ns) |
| <b>Blind <i>norpA</i></b>               |  |  |  |  |  |  |  |  |  |                |

| <b>T-patterns</b>                                 |                    |                                                   |                    |                                  |                                 |                                       |                                                   |                                    |                                         |                           |
|---------------------------------------------------|--------------------|---------------------------------------------------|--------------------|----------------------------------|---------------------------------|---------------------------------------|---------------------------------------------------|------------------------------------|-----------------------------------------|---------------------------|
| <b>Table S17</b>                                  | <b>Wild - type</b> | <b><i>norpA</i> Rh1 rescue Binocular Saccades</b> | <b>R7/8 pooled</b> | <b><i>norpA</i> Rh3-6 rescue</b> | <b><i>ninaE<sup>8</sup></i></b> | <b>WT Monocular (one eye blocked)</b> | <b><i>norpA</i> Rh1 rescue Monocular Saccades</b> | <b>Blind pooled</b>                | <b>Blind <i>hdc<sup>JK910</sup></i></b> | <b>Blind <i>norpA</i></b> |
| <b>Wild-type</b>                                  |                    | P = 0.988 (ns)                                    | P = 0.099 (ns)     | P = 0.325 (ns)                   | P = 0.106 (ns)                  | P = 0.320 (ns)                        | P = 0.006 (**)                                    | P = 1.243 x 10 <sup>-4</sup> (***) | P = 2.377 x 10 <sup>-4</sup> (***)      | P = 0.009 (**)            |
| <b><i>norpA</i> Rh1 rescue Binocular Saccades</b> |                    |                                                   | P = 0.153 (ns)     | P = 0.391 (ns)                   | P = 0.155 (ns)                  | P = 0.378 (ns)                        | P = 0.018 (*)                                     | P = 8.234 x 10 <sup>-4</sup> (***) | P = 0.001 (**)                          | P = 0.024 (*)             |
| <b>R7/8 pooled</b>                                |                    |                                                   |                    |                                  |                                 | P = 0.010 (*)                         | P = 0.036 (*)                                     | P = 0.014 (*)                      | P = 0.007 (**)                          | P = 0.135 (ns)            |
| <b><i>norpA</i> Rh3-6 rescue</b>                  |                    |                                                   |                    |                                  | P = 0.535 (ns)                  | P = 0.076 (ns)                        | P = 0.073 (ns)                                    | P = 0.022 (*)                      | P = 0.008 (**)                          | P = 0.141 (ns)            |
| <b><i>ninaE<sup>8</sup></i></b>                   |                    |                                                   |                    |                                  |                                 | P = 0.018 (*)                         | P = 0.140 (ns)                                    | P = 0.105 (ns)                     | P = 0.035 (*)                           | P = 0.347 (ns)            |
| <b>WT Monocular (one eye blocked)</b>             |                    |                                                   |                    |                                  |                                 |                                       | P = 0.003 (**)                                    | P = 8.133 x 10 <sup>-6</sup> (***) | P = 1.816 x 10 <sup>-5</sup> (***)      | P = 0.002 (**)            |
| <b><i>norpA</i> Rh1 rescue</b>                    |                    |                                                   |                    |                                  |                                 |                                       |                                                   | P = 0.360 (ns)                     | P = 0.597 (ns)                          | P = 0.36                  |

|                                         |  |  |  |  |  |  |  |  |  |                |
|-----------------------------------------|--|--|--|--|--|--|--|--|--|----------------|
| <b>Monocular Saccades</b>               |  |  |  |  |  |  |  |  |  | 5 (ns)         |
| <b>Blind pooled</b>                     |  |  |  |  |  |  |  |  |  |                |
| <b>Blind <i>hdc<sup>JK910</sup></i></b> |  |  |  |  |  |  |  |  |  | P = 0.420 (ns) |
| <b>Blind <i>norpA</i></b>               |  |  |  |  |  |  |  |  |  |                |

T-patterns **WT Monocular** had a greater PI than any other group. So, the significant differences found with **R7/8 pooled** and ***ninaE<sup>8</sup>*** are due to **WT monocular** learning better, not the other way around.

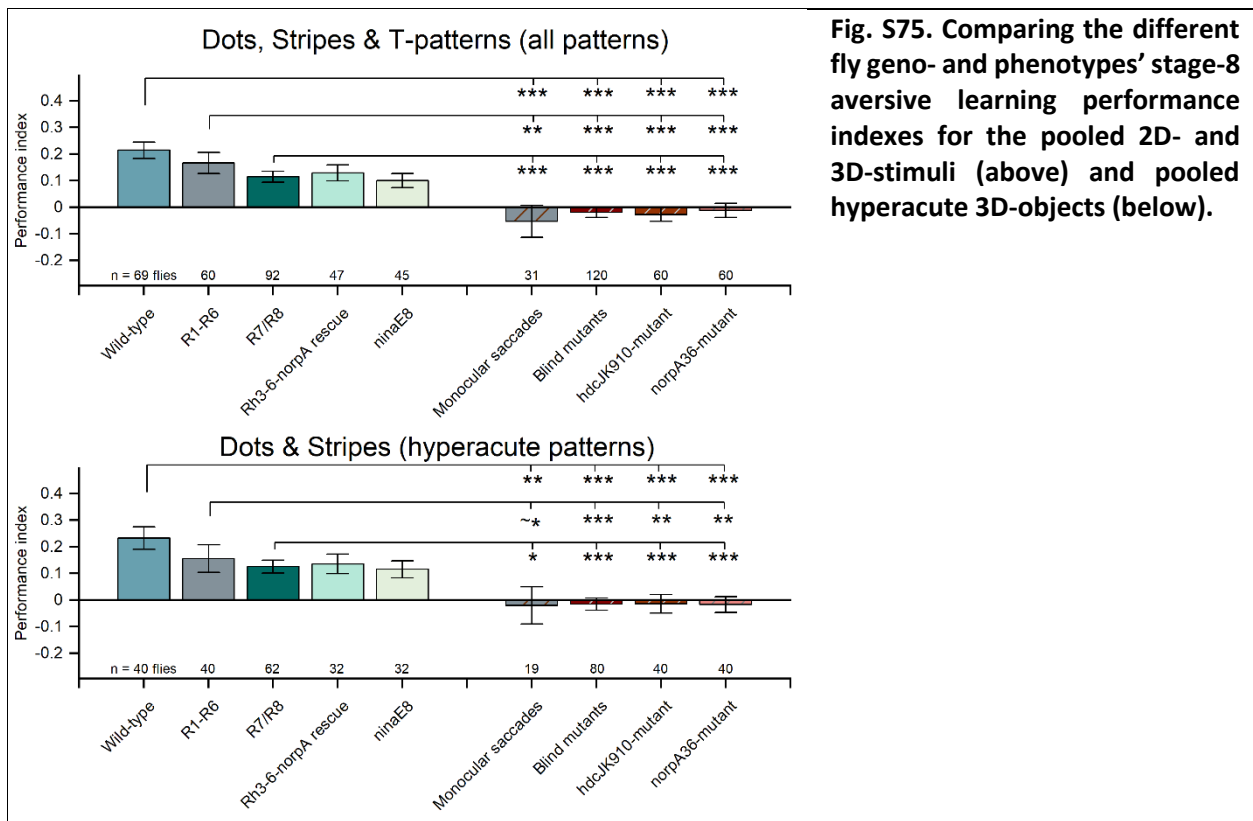

**Fig. S75. Comparing the different fly geno- and phenotypes' stage-8 aversive learning performance indexes for the pooled 2D- and 3D-stimuli (above) and pooled hyperacute 3D-objects (below).**

| 3D- (Dots, Stripes) & 2D-stimuli (T-patterns) Pooled |                  |                                                   |                    |                                  |                                 |                                                   |                     |                                         |                           |
|------------------------------------------------------|------------------|---------------------------------------------------|--------------------|----------------------------------|---------------------------------|---------------------------------------------------|---------------------|-----------------------------------------|---------------------------|
| <b>Table S18</b>                                     | <b>Wild-type</b> | <b><i>norpA</i> Rh1 rescue Binocular Saccades</b> | <b>R7/8 pooled</b> | <b><i>norpA</i> Rh3-6 rescue</b> | <b><i>ninaE<sup>8</sup></i></b> | <b><i>norpA</i> Rh1 rescue Monocular Saccades</b> | <b>Blind pooled</b> | <b>Blind <i>hdc<sup>JK910</sup></i></b> | <b>Blind <i>norpA</i></b> |

|                                            |  |                  |                                   |                  |                  |                                    |                                     |                                    |                                    |
|--------------------------------------------|--|------------------|-----------------------------------|------------------|------------------|------------------------------------|-------------------------------------|------------------------------------|------------------------------------|
| Wild-type                                  |  | P = 0.336 (n.s.) | P = 5.570 x 10 <sup>-3</sup> (**) | P = 0.060 (n.s.) | P = 0.011 (*)    | P = 3.188 x 10 <sup>-5</sup> (***) | P = 5.624 x 10 <sup>-11</sup> (***) | P = 2.721 x 10 <sup>-8</sup> (***) | P = 2.238 x 10 <sup>-7</sup> (***) |
| <i>norpA</i> Rh1 rescue Binocular Saccades |  |                  | P = 0.209 (n.s.)                  | P = 0.480 (n.s.) | P = 0.202 (n.s.) | P = 0.003 (**)                     | P = 2.598 x 10 <sup>-6</sup> (***)  | P = 8.020 x 10 <sup>-5</sup> (***) | P = 3.066 x 10 <sup>-4</sup> (***) |
| R7/8 pooled                                |  |                  |                                   |                  |                  | P = 8.577 x 10 <sup>-4</sup> (***) | P = 1.684 x 10 <sup>-6</sup> (***)  | P = 1.960 x 10 <sup>-5</sup> (***) | P = 1.607 x 10 <sup>-4</sup> (***) |
| <i>norpA</i> Rh3-6 rescue                  |  |                  |                                   |                  | P = 0.472 (n.s.) | P = 3.970 x 10 <sup>-3</sup> (**)  | P = 3.124 x 10 <sup>-5</sup> (***)  | P = 1.185 x 10 <sup>-4</sup> (***) | P = 6.189 x 10 <sup>-4</sup> (***) |
| <i>ninaE</i> <sup>8</sup>                  |  |                  |                                   |                  |                  | P = 0.012 (*)                      | P = 5.735 x 10 <sup>-4</sup> (***)  | P = 9.414 x 10 <sup>-4</sup> (***) | P = 4.260 x 10 <sup>-3</sup> (**)  |
| <i>norpA</i> Rh1 rescue Monocular Saccades |  |                  |                                   |                  |                  |                                    | P = 0.483 (n.s.)                    | P = 0.649 (n.s.)                   | P = 0.475 (n.s.)                   |
| Blind pooled                               |  |                  |                                   |                  |                  |                                    |                                     |                                    |                                    |
| Blind <i>hdc</i> <sup>JK910</sup>          |  |                  |                                   |                  |                  |                                    |                                     |                                    | P = 0.679 (n.s.)                   |
| Blind <i>norpA</i>                         |  |                  |                                   |                  |                  |                                    |                                     |                                    |                                    |

| 3D-stimuli (Dots & Stripes) Pooled |           |                                            |             |                           |                           |                                            |              |                                   |                    |
|------------------------------------|-----------|--------------------------------------------|-------------|---------------------------|---------------------------|--------------------------------------------|--------------|-----------------------------------|--------------------|
| Table S19                          | Wild-type | <i>norpA</i> Rh1 rescue Binocular Saccades | R7/8 pooled | <i>norpA</i> Rh3-6 rescue | <i>ninaE</i> <sup>8</sup> | <i>norpA</i> Rh1 rescue Monocular Saccades | Blind pooled | Blind <i>hdc</i> <sup>JK910</sup> | Blind <i>norpA</i> |

|                                                   |  |                  |                  |                  |                  |                                  |                                    |                                    |                                    |
|---------------------------------------------------|--|------------------|------------------|------------------|------------------|----------------------------------|------------------------------------|------------------------------------|------------------------------------|
| <b>Wild-type</b>                                  |  | P = 0.253 (n.s.) | P = 0.020 (*)    | P = 0.095 (n.s.) | P = 0.040 (*)    | P = 1.89 x 10 <sup>-3</sup> (**) | P = 1.042 x 10 <sup>-7</sup> (***) | P = 2.156 x 10 <sup>-5</sup> (***) | P = 6.543 x 10 <sup>-6</sup> (***) |
| <b><i>norpA</i> Rh1 rescue Binocular Saccades</b> |  |                  | P = 0.567 (n.s.) | P = 0.768 (n.s.) | P = 0.547 (n.s.) | P = 0.055 (~*)                   | P = 6.575 x 10 <sup>-4</sup> (***) | P = 8.320 x 10 <sup>-3</sup> (**)  | P = 5.310 x 10 <sup>-3</sup> (**)  |
| <b>R7/8 pooled</b>                                |  |                  |                  |                  |                  | P = 1.391 x 10 <sup>-2</sup> (*) | P = 4.354 x 10 <sup>-5</sup> (***) | P = 9.373 x 10 <sup>-4</sup> (***) | P = 3.462 x 10 <sup>-4</sup> (***) |
| <b><i>norpA</i> Rh3-6 rescue</b>                  |  |                  |                  |                  | P = 0.678 (n.s.) | P = 3.370 x 10 <sup>-2</sup> (*) | P = 5.866 x 10 <sup>-4</sup> (***) | P = 4.250 x 10 <sup>-3</sup> (**)  | P = 1.660 x 10 <sup>-3</sup> (**)  |
| <b><i>ninaE</i><sup>8</sup></b>                   |  |                  |                  |                  |                  | P = 0.053 (~*)                   | P = 2.350 x 10 <sup>-3</sup> (**)  | P = 9.840 x 10 <sup>-3</sup> (**)  | P = 3.870 x 10 <sup>-3</sup> (**)  |
| <b><i>norpA</i> Rh1 rescue Monocular Saccades</b> |  |                  |                  |                  |                  |                                  | P = 0.935 (n.s.)                   | P = 0.931 (n.s.)                   | P = 0.958 (n.s.)                   |
| <b>Blind pooled</b>                               |  |                  |                  |                  |                  |                                  |                                    |                                    |                                    |
| <b>Blind <i>hdc</i><sup>JK910</sup></b>           |  |                  |                  |                  |                  |                                  |                                    |                                    | P = 0.955 (n.s.)                   |
| <b>Blind <i>norpA</i></b>                         |  |                  |                  |                  |                  |                                  |                                    |                                    |                                    |

## VII. *Drosophila* Genetics

Blind *hdc*<sup>JK910</sup> mutant flies. *hdc*<sup>JK910</sup> photoreceptors have normal phototransduction but cannot synthesize their neurotransmitter, histamine. Non-functional histidine decarboxylase of *hdc*<sup>JK910</sup> mutants prevents neurotransmitter histamine synthesis in photoreceptors (118, 119). Therefore, their electroretinograms (ERGs) lack On- and Off-transients (118, 119), associated with synaptic light information transfer to visual interneurons, LMCs (12, 13). *hdc*<sup>JK910</sup> flies were received from Erich Buchner's lab (Julius-Maximilians-Universität, Würzburg, Germany).

Blind *trp/trpl* null-mutants express normal phototransduction reactants but lack their light-gated ion channels completely. These photoreceptors cannot generate electrical responses to light, showing zero-ERG signal, but they contract photomechanically (3, 4). These dynamics are consistent with the hypothesis of the light-induced phosphatidylinositol 4,5-bisphosphate (PIP2) cleaving from the microvillar photoreceptor plasma membrane causing the rhabdomere contractions (3).

Blind *norpA*<sup>P24</sup> mutant flies. *norpA*<sup>P24</sup> is a protein-null mutant of phospholipase C required for phototransduction. The mutation involves a 28-bp deletion that causes a reading frameshift, resulting in the substitution of 24 amino acids followed by a premature truncation of the protein (120). The mutants are essentially completely blind.

The UV-flies were generated using rhodopsin *ninaE8*, also known as Rh1, with rescued UV-rhodopsin (Rh3) insertion. The *ninaE8* (*ninaE*<sup>P334</sup>) mutation reduces the expression of the rhodopsin *ninaE* to 0.0004% of wild-type levels (15, 121). This particular mutation was chosen as some level of expression of *ninaE* is required for normal rhabdomere development (122).

The fused rhabdom line: *w; spam*<sup>1</sup>/*spam*<sup>1</sup> Frt; *sqh*-GFP/Tm6B was a gift from Andrew Zelhof.

**Transgenic Rhodopsin-specific *norpA* rescue flies.** Flies with functional R1-R6 were generated by crossing wild-type flies bearing a P element containing *norpA* cDNA under an Rh1 promoter (*P[Rh1+norpA]*) with a *norpA*<sup>36</sup> mutant (15). Rh3, Rh4, Rh5, Rh6-specific *norpA* rescue flies, described in (123), were used to generate flies with functional pale R7, yellow R7, pale R8, and yellow R8 by crossing with a *norpA*<sup>36</sup> mutant, respectively.

**Flies for 2-photon imaging.** The UV-fly genotype used in 2-photon Ca<sup>2+</sup>-imaging was UAS-GCaMP6f/CyO; L2-Gal4, UV/TM6B and UAS-GCaMP6; L2-Gal4, UV/TM6B. Origins of its different parts: R1-R6 photoreceptor UV-sensitivity resulted from *P(Rh1:Rh3)[4303],ninaE[8]/TM6B*, see supplementary material (15). L2-Gal4 was 21D-Gal4, a gift from Martin Heisenberg (124). 21-Gal4 insertion was recombined to chromosome III together with the UV genetic set *P(Rh1:Rh3)[4303],ninaE[8]*, using our UV-line stock and the 21D-Gal4 insertion line. The resulting lines were crossed to UAS-CD8-GFP and tested for GFP presence in L2 neurons using fluorescence microscopy. The presence of the UV genetic set was verified in positive lines by ERG testing for UV-sensitivity (15). UAS-GCaMP6f was BS42747 *P[20xUAS-IVS-GCaMP6f]* at P40 2L. Their eyes' structural integrity and photoreceptor microsaccade dynamics were found to be within the normal range (fig.27-28; fig.32), as tested with the goniometric deep pseudopupil imaging system (see Section II.2 and Section III.1 above).

| Genotype                                                 | Experimental methods |                     |                        |     |                  |                  | Results                |                           |
|----------------------------------------------------------|----------------------|---------------------|------------------------|-----|------------------|------------------|------------------------|---------------------------|
|                                                          | X-ray imaging        | Pseudopupil imaging | Direct R1-R7/8 imaging | ERG | 2-photon imaging | Flight simulator | R1-R7/8 Micro-saccades | Hyper-acute stereo vision |
| Berlin wild-type                                         | ✓                    | ✓                   | ✓                      | ✓   | no               | ✓                | ✓                      | ✓                         |
| <i>hdc<sup>JK910</sup></i> (blind)                       | ✓                    | ✓                   | ✓                      | ✓   | no               | ✓                | ✓                      | no                        |
| <i>norpA<sup>P24</sup></i> (blind)                       | ✓                    | ✓                   | ✓                      | ✓   | no               | ✓                | no                     | no                        |
| <i>trp/trpl</i> (blind)                                  | ✓                    | ✓                   | ✓                      | ✓   | no               | ✓                | ✓                      | no                        |
| [Rh1+ <i>norpA</i> ]                                     | no                   | ✓                   | ✓                      | ✓   | no               | ✓                | ✓                      | ✓                         |
| [Rh3+ <i>norpA</i> ]                                     | no                   | ✓                   | no                     | ✓   | no               | no               | ✓                      | -                         |
| [Rh4+ <i>norpA</i> ]                                     | no                   | ✓                   | no                     | ✓   | no               | no               | ✓ (weak)               | -                         |
| [Rh5+ <i>norpA</i> ]                                     | no                   | ✓                   | no                     | ✓   | no               | no               | ✓                      | -                         |
| [Rh6+ <i>norpA</i> ]                                     | no                   | ✓                   | no                     | ✓   | no               | no               | ✓                      | -                         |
| [Rh3-6+ <i>norpA</i> ]                                   | no                   | ✓                   | no                     | ✓   | no               | ✓                | ✓                      | ✓                         |
| <i>ninaE<sup>8</sup></i> (R1-R6 blind; R7/R8 functional) | no                   | ✓                   | no                     | ✓   | no               | ✓                | ✓                      | ✓                         |
| UV-flies [Rh3(in R1-R6)+ <i>ninaE<sup>8</sup></i> ]      | no                   | ✓                   | ✓                      | ✓   | no               | no               | ✓                      | ✓                         |
| UV-flies with gCAMP6f in L2                              | no                   | ✓                   | ✓                      | ✓   | ✓                | no               | ✓                      | ✓                         |
| Canton-S with gCAMP6f in L2                              | no                   | ✓                   | ✓                      | ✓   | ✓                | no               | ✓                      | ✓                         |
| <i>Spam</i> (R1-R8 rhabdomeres fused)                    | ✓                    | ✓                   | no                     | ✓   | no               | no               | ✓                      | -                         |
| <i>dSK</i>                                               | no                   | ✓                   | no                     | ✓   | no               | no               | ✓                      | -                         |

Berlin wild-type *Drosophila* showed consistent photoreceptor microsaccade dynamics in X-ray, deep pseudopupil, and direct R1-R7/8 high-speed imaging, and hyperacute stereo vision in associative learning experiments.

| Parameter or abbreviation | Definition                                               | Value | Data source or reference |
|---------------------------|----------------------------------------------------------|-------|--------------------------|
| ESRF                      | European Synchrotron Research Facility, Grenoble, France |       |                          |
| DESY                      | Deutsches Elektronen-Synchrotron Hamburg, Germany        |       |                          |

|                |                                                                                         |  |           |
|----------------|-----------------------------------------------------------------------------------------|--|-----------|
| ERG            | electroretinogram                                                                       |  |           |
| LMCs           | Large monopolar cells                                                                   |  |           |
| KB             | Kirkpatrick–Baez                                                                        |  |           |
| $R(x, y)$      | Two-dimensional cross-correlation                                                       |  | Eq. 1     |
| $T(x, y)$      | Template image                                                                          |  | Eq. 1     |
| $I(x, y)$      | Source image                                                                            |  | Eq. 1     |
| $T'(x', y')$   | Normalized template image                                                               |  | Eq. 2     |
| $I'(x', y')$   | Normalized source image                                                                 |  | Eq. 3     |
| $D$            | Displacement                                                                            |  | Eq. 4     |
| R1-R8          | Photoreceptors 1-8 in an ommatidium                                                     |  |           |
| DPP            | Deep pseudopupil                                                                        |  |           |
| NA             | Numerical aperture                                                                      |  | Eq. 5     |
| $n$            | Refractive index                                                                        |  | Eq. 5     |
| $\theta$       | Half angle                                                                              |  | Eq. 5     |
| N              | f-stop                                                                                  |  | Eq. 6     |
| $f$            | Focal length                                                                            |  | Eq. 6     |
| D              | Lens diameter                                                                           |  | Eq. 6     |
| CG             | Computer graphics                                                                       |  |           |
| $T(f)$         | Transfer function                                                                       |  | Eq. 8     |
| $c(t), C(f)$   | Contrast stimulus in time, frequency                                                    |  | Eq. 8     |
| $s(t), S(f)$   | Signal in time, frequency                                                               |  | Eq. 8     |
| Rh1,3,4,5,6    | Rhodopsin 1,3,4,5,6                                                                     |  |           |
| L2             | Large monopolar cell type 2                                                             |  |           |
| F              | Fluorescence                                                                            |  |           |
| $F_0$          | Background fluorescence                                                                 |  |           |
| $\Delta F$     | Fluorescence difference                                                                 |  |           |
| R              | Rayleigh criterion                                                                      |  | Eq. 9     |
| $T$            | Trough amplitude                                                                        |  | Eq. 9     |
| $P_{min}$      | Smallest peak amplitude                                                                 |  | Eq. 9     |
| $P_{max}$      | Highest peak amplitude                                                                  |  | Eq. 9     |
| $\lambda(t)$   | Grating stimulus wavelength                                                             |  | Eq. 10-11 |
| $s$            | Grating stimulus speed                                                                  |  | Eq. 10-11 |
| $\theta$       | Grating stimulus motion direction                                                       |  | Eq. 10-11 |
| $\lambda_0$    | Grating stimulus initial wavelength                                                     |  | Eq. 10-11 |
| $\lambda_1$    | Grating stimulus final wavelength                                                       |  | Eq. 10-11 |
| SRA            | Smallest resolved angle                                                                 |  |           |
| SNR            | Signal-to-noise ratio                                                                   |  |           |
| $\alpha_{min}$ | Minimum inter-bar distance for SRA                                                      |  | Eq. 13    |
| $\omega$       | Stimulus motion speed                                                                   |  | Eq. 13    |
| $f_s$          | Sampling rate                                                                           |  | Eq. 13    |
| ROI            | Region of interest                                                                      |  |           |
| $\theta$       | The incident light angle between the light point source, $p$ , and the lens center axis |  |           |
| $p$            | Light point source                                                                      |  |           |



|                        |                                                      |                                              |        |
|------------------------|------------------------------------------------------|----------------------------------------------|--------|
| $\lambda$              | Light wavelength                                     | 450 nm (set in simulations)                  |        |
| $k_0$                  | Wavenumber                                           |                                              |        |
| $\mathbf{r}$           | (x,y,z) position                                     |                                              | Eq. 13 |
| $E_\omega(\mathbf{r})$ | Complex electrical field                             |                                              | Eq. 13 |
| $n^2(\mathbf{r})$      | Refractive index                                     |                                              | Eq. 13 |
| $\Psi(\mathbf{r})$     | Slowly varying electrical field                      |                                              | Eq. 16 |
| $n_0$                  | Average refractive index                             |                                              | Eq. 16 |
| $\Delta z$             | Distance step                                        |                                              | Eq. 18 |
| $\mathbf{M}(z)$        | Electrical field in x,y plane                        |                                              | Eq. 19 |
| $k_x, k_y$             | Wavenumber in x,y-direction                          |                                              | Eq. 19 |
| $\kappa$               | Material absorbance                                  |                                              | Eq. 20 |
| $P_{abs}$              | Total absorbed power                                 |                                              | Eq. 21 |
| $P_p$                  | Total absorbed light flux                            |                                              | Eq. 22 |
| $\Lambda$              | Optical distance                                     |                                              | Eq. 23 |
| $s_i$                  | Ray travel distance                                  |                                              | Eq. 23 |
| $x', y'$               | Rays x,y position                                    |                                              | Eq. 23 |
| $\Delta s_l^\perp$     | Rays relative power                                  |                                              | Eq. 24 |
| $l$                    | Ray index                                            |                                              | Eq. 24 |
| $\Delta s_l$           | Rays' area                                           |                                              | Eq. 24 |
| $\theta$               | Ray's angle compared to the z-axis                   |                                              | Eq. 24 |
| $ E_l^{ray} $          | Rays relative                                        |                                              | Eq. 25 |
| $\mathbf{M}_0$         | Initial electrical field strength                    |                                              | Eq. 26 |
|                        | Ommatidial lens thickness                            | 8 $\mu\text{m}$                              | (60)   |
|                        | Ommatidial lens diameter                             | 16 $\mu\text{m}$                             | (60)   |
|                        | Ommatidial lens outer surface curvature              | 11 $\mu\text{m}$                             | (60)   |
|                        | Ommatidial lens inner surface curvature              | -11 $\mu\text{m}$                            | (60)   |
|                        | Ommatidial lens refractive index                     | 1.45                                         | (60)   |
| $n_{min}$              | Crystal cone refractive index and outside rhabdomere | 1.34                                         | (60)   |
| $n_{max}$              | Rhabdomere refractive index                          | 1.363                                        | (60)   |
|                        | Cone/pigment-cell aperture diameter                  | 5 $\mu\text{m}$                              | (60)   |
|                        | Cone/pigment-cell aperture thickness                 | 2 $\mu\text{m}$                              | (60)   |
|                        | Cone/pigment-cell aperture total transmittance       | 2.8 %                                        |        |
| QB                     | Quantum Bump                                         |                                              |        |
| $\Gamma$               | Gamma distribution                                   |                                              | Eq. 27 |
| $n_g$                  | Gamma distribution parameter                         |                                              | Eq. 27 |
| $\tau$                 | Gamma distribution parameter                         |                                              | Eq. 27 |
| $Q_{10}$               | Temperature dependency                               |                                              |        |
| LIC                    | Light-induced current                                |                                              |        |
| RF                     | A photoreceptor's Receptive Field                    |                                              |        |
| $x_d$                  | Rhabdomere displacement                              |                                              | Eq. 28 |
| $act(t)$               | Light activation for rhabdomere displacement         |                                              | Eq. 28 |
| $H_{act}$              | Light activation half value                          | 9,000 $\text{ph}/\mu\text{m}^{1/2}$ (fitted) | Eq. 28 |

|                  |                                                                                                 |                                                                                                                                                                                                             |                                                            |
|------------------|-------------------------------------------------------------------------------------------------|-------------------------------------------------------------------------------------------------------------------------------------------------------------------------------------------------------------|------------------------------------------------------------|
| $n_{act}$        | Light activation co-operation exponent                                                          | 2 (fitted)                                                                                                                                                                                                  | Eq. 28                                                     |
| $D_{coef}$       | Maximal positive dampener force                                                                 | 0.0001 $\mu\text{m}/\text{ms}^2$ (fitted)                                                                                                                                                                   | Eq. 28                                                     |
| $D_{base}$       | Dampener exponent base                                                                          | 2 (fitted)                                                                                                                                                                                                  | Eq. 28                                                     |
| $D_{exp}$        | Dampener exponent                                                                               | 3,900 $\mu\text{m}/\text{ms}$ (fitted)                                                                                                                                                                      | Eq. 28                                                     |
| $spring$         | Spring constant                                                                                 |                                                                                                                                                                                                             | Eq. 28-29                                                  |
| $k_{s0}$         | Base spring constant                                                                            | 0.0001/ $\text{ms}^2$ (fitted)                                                                                                                                                                              | Eq. 29                                                     |
| $H_{coef}$       | Adjustable spring constant                                                                      | 0.00115 1/ $\text{ms}^2$ (fitted)                                                                                                                                                                           | Eq. 29                                                     |
| $H_{spring}$     | Half value of spring constant adjustment                                                        | 200 ph/ms (fitted)                                                                                                                                                                                          | Eq. 29                                                     |
| $n_{act}$        | The exponent of spring constant adjustment                                                      | 1.3 (fitted)                                                                                                                                                                                                | Eq. 29                                                     |
| $\Delta\varphi$  | Interommatidial angle (horizontal distance)                                                     | 4.5° (from anatomy)<br>5.1° (from geometry)                                                                                                                                                                 | Eq.32, (5)<br>(60)                                         |
| $\Delta\rho_l^s$ | Optical light input RF half-width (acceptance angle) of a <i>static</i> (non-moving) rhabdomere | <b>R1 and R6:</b><br>5.0° ± 0.1<br><b>R2-R5:</b><br>4.5° ± 0.1<br><b>R7/R8:</b><br>3.12°<br><b>R1-R7/8:</b><br>~2°-4° (rhabdomeres modeled <i>at the lens center axis</i> ; in reality, R1-R6 are off-axis) | See <b>Table S6</b><br><br>See <b>Table S6</b><br><br>(60) |
| $\Delta\rho_l^d$ | Optical light input RF half-width (acceptance angle) of a <i>dynamic</i> (moving) rhabdomere    | <b>R1 and R6:</b><br>4.67°<br><b>R2-R5:</b><br>4.05°<br><b>R7/R8:</b><br>2.7°<br><b>R1-R7/8</b> (the average)<br>3.5° (from <i>Drosophila</i> flight behavior; hence with intact microsaccades)             | See <b>Table S6</b><br><br><br><br><br>(125)               |
| $\Delta\rho_v^s$ | Voltage output RF half-width (acceptance angle) of a <i>static</i> (non-moving) rhabdomere      | <b>Dark-adapted R2-R5:</b><br>6.4° ± 0.4°<br><b>Dark-adapted R1 and R6:</b><br>7.1° ± 0.4°                                                                                                                  |                                                            |
| $\Delta\rho_v^d$ | Voltage output RF half-width (acceptance angle) of R1-R6 <i>dynamic</i> (moving) rhabdomeres    | <b>Dark-adapted R1-R6:</b><br>9.65° ± 1.06°<br>8.23° ± 0.54°<br><b>Moderately light-adapted R1-R6:</b><br>7.70° ± 0.52°                                                                                     | (4)<br>(5)<br><br>(4)                                      |
| $z$              | Depth                                                                                           |                                                                                                                                                                                                             | Eq. 30 and Eq. 35                                          |

|          |                                                              |                                                     |                   |
|----------|--------------------------------------------------------------|-----------------------------------------------------|-------------------|
| $k$      | Eye to eye distance                                          | 440 $\mu\text{m}$                                   | Eq. 30            |
| $\phi$   | Photoreceptor convergence angle                              |                                                     | Eq. 30 and Eq. 36 |
| $z_e$    | Eye radius                                                   | 183 $\mu\text{m}$ (from ommatidium lens properties) | Eq. 33            |
| $\phi_0$ | Starting photoreceptor convergence angle                     | 5.8°                                                | Eq. 36            |
| $\phi_t$ | Speed-dependent exponent for photoreceptor convergence angle | 0.26565                                             | Eq. 36            |

## Movie legends

**Movie S1. *In vivo* X-ray imaging *Drosophila* eyes' internal structure and global photomechanical photoreceptor contraction dynamics.** X-rays activate the right and left eye's radially arranged string-like photoreceptors to contract rapidly and mirror-symmetrically in the back-to-front direction.

**Movie S2. *In vivo* X-ray imaging and ERG-recording the *Drosophila* eyes' photomechanical photoreceptor dynamics.** X-rays activate phototransduction with photoreceptor contractions similar to visible light.

**Movie S3. Mapping *in vivo* the *Drosophila* eyes' stereoscopic field of view with high-speed deep pseudopupil imaging.**

**Movie S4. Mapping *in vivo* the photomechanical photoreceptor microsaccade movement directions across the *Drosophila* eyes.**

**Movie S5. Measuring *in vivo* the light-adapted photomechanical photoreceptor microsaccades' movement dynamics to brief light contrast changes.**

**Movie S6. The left and right eyes' mirror-symmetrically moving photoreceptor receptive fields match the corresponding optic flow field of a forward-flying *Drosophila* to enhance information capture.**

**Movie S7. During yaw rotation, the left and right eyes' mirror-symmetrically moving photoreceptor receptive fields enhance binocular contrast differences in the world.**

**Movie S8. *In vivo* two-photon imaging of L2 monopolar cells' medulla terminals reveals their hyperacute receptive field organization along with the photoreceptor microsaccade movement maps.**

**Movie S9. The corresponding left and right eye R6 photoreceptor cells' receptive fields move with and against an object that crosses them, providing dynamic depth information to the *Drosophila* brain.**

**Movie S10. Theory of stereoscopic information sampling by the *Drosophila* eyes.** Simulations show how the binocular left and right photoreceptor cells' receptive fields feed dynamic depth information to the *Drosophila* brain about the distance of close-by and further away objects of the same angular size.

1. M. F. Land, Visual acuity in insects. *Annu Rev Entomol* **42**, 147-177 (1997).
2. S. B. Laughlin, The role of sensory adaptation in the retina. *J Exp Biol* **146**, 39-62 (1989).
3. R. C. Hardie, K. Franze, Photomechanical responses in *Drosophila* photoreceptors. *Science* **338**, 260-263 (2012).
4. M. Juusola *et al.*, Microsaccadic sampling of moving image information provides *Drosophila* hyperacute vision. *Elife* **6**, (2017).
5. P. T. Gonzalez-Bellido, T. J. Wardill, M. Juusola, Compound eyes and retinal information processing in miniature *dipteran* species match their specific ecological demands. *P Natl Acad Sci USA* **108**, 4224-4229 (2011).
6. N. Franceschini, R. Chagneux, K. Kirschfeld, A. Mucke, in *Göttingen Neurobiology Report: Synapse - Transmission Modulation*, N. Elsner, H. Penzlin, Eds. (Georg Thieme Verlag, Stuttgart, New York, 1991), pp. 1.
7. N. Franceschini, Combined optical, neuroanatomical, electrophysiological and behavioural studies on signal processing in the fly compound eye. *Ser Biophys Biocyber* **2**, 341-361 (1997).
8. L. E. Lipetz, The mechanism of the X-ray phosphene. *Radiat Res* **1**, 551-551 (1954).
9. L. E. Lipetz, Electrophysiology of the X-ray phosphene. *Radiat Res* **2**, 306-329 (1955).
10. C. M. Avakjan, in *Electroretinographia*. (University Brne, Lekarska Fakulta 1959), pp. 105-108.
11. K. D. Steidley, The radiation phosphene. *Vision research* **30**, 1139-1143 (1990).
12. P. E. Coombe, The large monopolar cells L1 and L2 are responsible for ERG transients in *Drosophila*. *J Comp Physiol A* **159**, 655-665 (1986).
13. A. Dau *et al.*, Evidence for dynamic network regulation of *Drosophila* photoreceptor function from mutants lacking the neurotransmitter histamine. *Front Neural Circuit* **10**, (2016).
14. N. Franceschini, K. Kirschfeld, Phenomena of pseudopupil in compound eye of *Drosophila*. *Kybernetik* **9**, 159-182 (1971).
15. T. J. Wardill *et al.*, Multiple spectral inputs improve motion discrimination in the *Drosophila* visual system. *Science* **336**, 925-931 (2012).
16. B. Pick, Specific misalignments of rhabdomere visual axes in neural superposition eye of *dipteran* flies. *Biol Cybern* **26**, 215-224 (1977).
17. N. Franceschini, in *Information processing in the visual systems of Anthropods* R. Wehner, Ed. (Springer-Verlag, Berlin, Heidelberg, New York, 1972), pp. 75-82.
18. A. Hyvärinen, J. Hurri, P. O. Hoyer, *Natural image statistics: a probabilistic approach to early computational vision*. (2009), vol. 39, pp. 1-448.
19. H. G. Krapp, R. Hengstenberg, Estimation of self-motion by optic flow processing in single visual interneurons. *Nature* **384**, 463-466 (1996).
20. Y. E. Fisher, M. Silies, T. R. Clandinin, Orientation selectivity sharpens motion detection in *Drosophila*. *Neuron* **88**, 390-402 (2015).
21. M. Silies *et al.*, Modular use of peripheral input channels tunes motion-detecting circuitry. *Neuron* **79**, 111-127 (2013).
22. M. Joesch, B. Schnell, S. V. Raghu, D. F. Reiff, A. Borst, ON and OFF pathways in *Drosophila* motion detection. *Neuroforum* **17**, 30-32 (2011).
23. M. Rivera-Alba *et al.*, Wiring economy and volume exclusion determine neuronal placement in the *Drosophila* brain. *Curr Biol* **22**, 172-172 (2012).
24. J. C. Tuthill, A. Nern, S. L. Holtz, G. M. Rubin, M. B. Reiser, Contributions of the 12 neuron classes in the fly lamina to motion vision. *Neuron* **79**, 128-140 (2013).
25. I. A. Meinertzhagen, S. D. O'Neil, Synaptic organization of columnar elements in the lamina of the wild-type in *Drosophila melanogaster*. *J Comp Neurol* **305**, 232-263 (1991).

26. A. Nikolaev *et al.*, Network adaptation improves temporal representation of naturalistic stimuli in *Drosophila* eye: II mechanisms. *Plos One* **4**, (2009).
27. H. H. Yang *et al.*, Subcellular imaging of voltage and calcium signals reveals neural processing *in vivo*. *Cell* **166**, 245-257 (2016).
28. L. Zheng *et al.*, Network adaptation improves temporal representation of naturalistic stimuli in *Drosophila* eye: I dynamics. *Plos One* **4**, (2009).
29. L. Zheng *et al.*, Feedback network controls photoreceptor output at the layer of first visual synapses in *Drosophila*. *J Gen Physiol* **127**, 495-510 (2006).
30. H. J. W. M. Hoekstra, On beam propagation methods for modelling in integrated optics. *Opt Quant Electron* **29**, 157-171 (1997).
31. Z. Song, M. Juusola, Refractory sampling links efficiency and costs of sensory encoding to stimulus statistics. *J Neurosci* **34**, 7216-7237 (2014).
32. Z. Song *et al.*, Stochastic, adaptive sampling of information by microvilli in fly photoreceptors. *Curr Biol* **22**, 1371-1380 (2012).
33. M. Courgeon, C. Desplan, Coordination between stochastic and deterministic specification in the *Drosophila* visual system. *Science* **366**, 325-336 (2019).
34. S. Tang, M. Juusola, Intrinsic activity in the fly brain gates visual information during behavioral choices. *Plos One* **5**, (2010).
35. K. Farrow, J. Haag, A. Borst, Nonlinear, binocular interactions underlying flow field selectivity of a motion-sensitive neuron. *Nat Neurosci* **9**, 1312-1320 (2006).
36. J. Haag, A. Borst, Electrical coupling of lobula plate tangential cells to a heterolateral motion-sensitive neuron in the fly. *J Neurosci* **28**, 14435-14442 (2008).
37. R. Rosner, G. Tarawneh, V. Lukyanova, J. C. A. Read, Binocular responsiveness of projection neurons of the praying mantis optic lobe in the frontal visual field. *J Comp Physiol A* **206**, 165-181 (2020).
38. T. Fujiwara, T. L. Cruz, J. P. Bohnslav, M. E. Chiappe, A faithful internal representation of walking movements in the *Drosophila* visual system. *Nat Neurosci* **20**, 72-81 (2017).
39. S. Tang, R. Wolf, S. P. Xu, M. Heisenberg, Visual pattern recognition in *Drosophila* is invariant for retinal position. *Science* **305**, 1020-1022 (2004).
40. B. Z. Kacsoh, Z. R. Lynch, N. T. Mortimer, T. A. Schlenke, Fruit flies medicate offspring after seeing parasites. *Science* **339**, 947-950 (2013).
41. E. Buchner, Elementary movement detectors in an insect visual-system. *Biological Cybernetics* **24**, 85-101 (1976).
42. M. F. Land, Motion and vision: why animals move their eyes. *J Comp Physiol A* **185**, 341-352 (1999).
43. S. Pick, R. Strauss, Goal-driven behavioral adaptations in gap-climbing *Drosophila*. *Curr Biol* **15**, 1473-1478 (2005).
44. L. Kerhuel, S. Viollet, N. Franceschini, The VODKA sensor: a bio-inspired hyperacute optical position sensing device. *IEEE Sensors J* **12**, 315-324 (2012).
45. V. P. Pandiyan *et al.*, The optoretinogram reveals how human photoreceptors deform in response to light. *bioRxiv*, (2020).
46. U. Bocchero *et al.*, Mechanosensitivity is an essential component of phototransduction in vertebrate rods. *Plos Biology* **18**, (2020).
47. R. Hengstenberg, Eye muscle system of housefly *Musca-Domestica* .1. Analysis of clock spikes and their source. *Kybernetik* **9**, 56-77 (1971).
48. M. Juusola, Z. Song, How a fly photoreceptor samples light information in time. *J Physiol-London* **595**, 5427-5437 (2017).
49. M. Juusola, R. C. Hardie, Light adaptation in *Drosophila* photoreceptors: I. Response dynamics and signaling efficiency at 25 degrees C. *J Gen Physiol* **117**, 3-25 (2001).

50. R. C. Hardie, A histamine-activated chloride channel involved in neurotransmission at a photoreceptor synapse. *Nature* **339**, 704-706 (1989).
51. A. Pantazis *et al.*, Distinct roles for two histamine receptors (hclA and hclB) at the *Drosophila* photoreceptor synapse. *J Neurosci* **28**, 7250-7259 (2008).
52. M. Juusola, R. O. Uusitalo, M. Weckstrom, Transfer of graded potentials at the photoreceptor interneuron synapse. *J Gen Physiol* **105**, 117-148 (1995).
53. A. C. Zehlf, R. W. Hardy, A. Becker, C. S. Zuker, Transforming the architecture of compound eyes. *Nature* **443**, 696-699 (2006).
54. J. Frohn *et al.*, 3D virtual histology of human pancreatic tissue by multiscale phase-contrast X-ray tomography. *J Synchrotron Radiat* **27**, 1707-1719 (2020).
55. T. Salditt *et al.*, Compound focusing mirror and X-ray waveguide optics for coherent imaging and nano-diffraction. *J Synchrotron Radiat* **22**, 867-878 (2015).
56. S. P. Krüger *et al.*, Sub-10 nm beam confinement by X-ray waveguides: design, fabrication and characterization of optical properties. *J Synchrotron Radiat* **19**, 227-236 (2012).
57. L. M. Lohse *et al.*, A phase-retrieval toolbox for X-ray holography and tomography. *Journal of Synchrotron Radiation* **27**, 852-859 (2020).
58. N. Franceschini, K. Kirschfeld, Optical study *in vivo* of photoreceptor elements in compound eye of *Drosophila*. *Kybernetik* **8**, 1-13 (1971).
59. M. Spencer, *Fundamentals of light microscopy*. IUPAB biophysics series (Cambridge University Press, Cambridge Cambridgeshire ; New York, 1982), pp. x, 93 p.
60. D. G. Stavenga, Angular and spectral sensitivity of fly photoreceptors. II. Dependence on facet lens F-number and rhabdomere type in *Drosophila*. *J Comp Physiol A* **189**, 189-202 (2003).
61. M. Juusola, A. Dau, L. Zheng, D. N. Rien, Electrophysiological method for recording intracellular voltage responses of *Drosophila* photoreceptors and interneurons to light stimuli *in vivo*. *Jove-J Vis Exp*, (2016).
62. X. F. Li *et al.*, Ca<sup>2+</sup>-activated K<sup>+</sup> channels reduce network excitability, improving adaptability and energetics for transmitting and perceiving sensory information. *J Neurosci* **39**, 7132-7154 (2019).
63. A. N. Abou Tayoun *et al.*, The *Drosophila* SK channel (*dSK*) contributes to photoreceptor performance by mediating sensitivity control at the first visual network. *J Neurosci* **31**, 13897-13910 (2011).
64. S. R. Henderson, H. Reuss, R. C. Hardie, Single photon responses in *Drosophila* photoreceptors and their regulation by Ca<sup>2+</sup>. *J Physiol-London* **524**, 179-194 (2000).
65. P. Hochstrate, K. Hamdorf, Microvillar components of light adaptation in blowflies. *J Gen Physiol* **95**, 891-910 (1990).
66. M. Juusola, R. C. Hardie, Light adaptation in *Drosophila* photoreceptors: II. Rising temperature increases the bandwidth of reliable signaling. *J Gen Physiol* **117**, 27-41 (2001).
67. M. Juusola, Linear and nonlinear contrast coding in light-adapted blowfly photoreceptors. *J Comp Physiol A* **172**, 511-521 (1993).
68. R. C. Hardie, M. Juusola, Phototransduction in *Drosophila*. *Curr Opin Neurobiol* **34**, 37-45 (2015).
69. M. Juusola, G. G. De Polavieja, The rate of information transfer of naturalistic stimulation by graded potentials. *J Gen Physiol* **122**, 191-206 (2003).
70. M. E. Fortini, G. M. Rubin, The optic lobe projection pattern of polarization-sensitive photoreceptor cells in *Drosophila melanogaster*. *Cell Tissue Res* **265**, 185-191 (1991).
71. P. Virtanen *et al.*, SciPy 1.0: fundamental algorithms for scientific computing in Python. *Nat Methods* **17**, 261-272 (2020).
72. S. Seabold, J. Perktold, in *Proceedings of the 9th Python in Science Conference (SCIPY 2010)*. (2010), pp. 92-96.

73. B. Minke, The history of the prolonged depolarizing afterpotential (PDA) and Its role in genetic dissection of *Drosophila* phototransduction. *J Neurogenet* **26**, 106-117 (2012).
74. M. E. Chiappe, J. D. Seelig, M. B. Reiser, V. Jayaraman, Walking modulates speed sensitivity in *Drosophila* motion vision. *Curr Biol* **20**, 1470-1475 (2010).
75. J. D. Seelig, M. E. Chiappe, G. K. Lott, M. B. Reiser, V. Jayaraman, Calcium imaging in *Drosophila* during walking and flight behavior. *Biophys J* **100**, 97-97 (2011).
76. J. H. van Hateren, Neural superposition and oscillations in the eye of the blowfly. *J Comp Physiol A* **161**, 849-855 (1987).
77. J. B. Shi, C. Tomasi, Good features to track. *1994 IEEE Computer Society Conference on Computer Vision and Pattern Recognition, Proceedings*, 593-600 (1994).
78. D. G. Stavenga, Angular and spectral sensitivity of fly photoreceptors. I. Integrated facet lens and rhabdomere optics. *J Comp Physiol A* **189**, 1-17 (2003).
79. D. G. Stavenga, Angular and spectral sensitivity of fly photoreceptors. III. Dependence on the pupil mechanism in the blowfly *Calliphora*. *J Comp Physiol A* **190**, 115-129 (2004).
80. J. E. Niven *et al.*, The contribution of Shaker K<sup>+</sup> channels to the information capacity of *Drosophila* photoreceptors. *Nature* **421**, 630-634 (2003).
81. W. Wijngaard, D. G. Stavenga, Optical crosstalk between fly rhabdomeres. *Biol Cybern* **18**, 61-67 (1975).
82. K. Kirschfeld, in *Processing of optical data by organisms and by machines* W. Reichardt, Ed. (Academic Press, New York, 1969), pp. 116-136.
83. E. J. Warrant, D. E. Nilsson, Absorption of white light in photoreceptors. *Vision research* **38**, 195-207 (1998).
84. U. Tepass, K. P. Harris, Adherens junctions in *Drosophila* retinal morphogenesis. *Trends Cell Biol* **17**, 26-35 (2007).
85. M. Vahasoyrinki, J. E. Niven, R. C. Hardie, M. Weckstrom, M. Juusola, Robustness of neural coding in *Drosophila* photoreceptors in the absence of slow delayed rectifier K<sup>+</sup> channels. *J Neurosci* **26**, 2652-2660 (2006).
86. Y. C. Gu, J. Oberwinkler, M. Postma, R. C. Hardie, Mechanisms of light adaptation in *Drosophila* photoreceptors. *Curr Biol* **15**, 1228-1234 (2005).
87. F. Wong, B. W. Knight, F. A. Dodge, Adapting bump model for ventral photoreceptors of *Limulus*. *J Gen Physiol* **79**, 1089-1113 (1982).
88. D. G. Stavenga, Visual acuity of fly photoreceptors in natural conditions - dependence on UV sensitizing pigment and light-controlling pupil. *J Exp Biol* **207**, 1703-1713 (2004).
89. N. Franceschini, K. Kirschfeld, Automatic-control of light flux in compound eye of *diptera* - spectral, statical, and dynamical properties of mechanism. *Biol Cybern* **21**, 181-203 (1976).
90. S. R. Shaw, A. Frohlich, I. A. Meinertzhagen, Direct connections between the R7/8 and R1-6 photoreceptor subsystems in the dipteran visual system. *Cell Tissue Res* **257**, 295-302 (1989).
91. G. J. Taylor *et al.*, Bumblebee visual allometry results in locally improved resolution and globally improved sensitivity. *Elife* **8**, (2019).
92. A. Riehle, N. Franceschini, Motion detection in flies: parametric control over ON-OFF pathways. *Exp Brain Res* **54**, 390-394 (1984).
93. V. Nityananda *et al.*, Insect stereopsis demonstrated using a 3D insect cinema. *Sci Rep-Uk* **6**, (2016).
94. B. Hassenstein, W. Reichardt, Systemtheoretische Analyse der Zeit-, Reihenfolgen- und Vorzeichenbewertung bei der Bewegungsperzeption des Rüsselkäfers *Chlorophanus*. *Z. Naturforsch*, 513-524 (1956).
95. G. G. de Polavieja, Neuronal algorithms that detect the temporal order of events. *Neural Comput* **18**, 2102-2121 (2006).



96. M. Juusola, Z. Song, R. C. Hardie, in *Encyclopedia of Computational Neuroscience*, D. Jaeger, R. Jung, Eds. (Springer New York, New York, NY, 2015), pp. 2359-2376.
97. F. Galton, Vox Populi. *Nature* **75**, 450-451 (1907).
98. R. Rosner, J. von Hadeln, G. Tarawneh, J. C. A. Read, A neuronal correlate of insect stereopsis. *Nat Commun* **10**, 2845 (2019).
99. H. Otsuna, K. Ito, Systematic analysis of the visual projection neurons of *Drosophila melanogaster*. I. Lobula-specific pathways. *J Comp Neurol* **497**, 928-958 (2006).
100. M. Wu *et al.*, Visual projection neurons in the *Drosophila* lobula link feature detection to distinct behavioral programs. *Elife* **5**, (2016).
101. L. K. Scheffer *et al.*, A connectome and analysis of the adult *Drosophila* central brain. *Elife* **9**, (2020).
102. S. S. Bidaye *et al.*, Two brain pathways initiate distinct forward walking programs in *Drosophila*. *Neuron* **108**, 469-485 (2020).
103. I. M. A. Ribeiro *et al.*, Visual projection neurons mediating directed courtship in *Drosophila*. *Cell* **174**, 607-621 (2018).
104. T. Nojima *et al.*, A sex-specific switch between visual and olfactory inputs underlies adaptive sex differences in behavior. *Curr Biol*, (2021).
105. G. Karypis, V. Kumar. (University of Minnesota, Minneapolis, MN, 2009).
106. G. W. Meissner *et al.*, An image resource of subdivided *Drosophila* GAL4-driver expression patterns for neuron-level searches. (2020).
107. K. Shinomiya *et al.*, The organization of the second optic chiasm of the *Drosophila* optic lobe. *Front Neural Circuits* **13**, 65 (2019).
108. M. A. Z. Dippé, E. H. Wold, Antialiasing through stochastic sampling. *ACM SIGGRAPH Computer Graphics* **19**, 69-78 (1985).
109. J. I. Yellott, Spectral-analysis of spatial sampling by photoreceptors - topological disorder prevents aliasing. *Vision research* **22**, 1205-1210 (1982).
110. J. I. Yellott, Spectral consequences of photoreceptor sampling in the *Rhesus* retina. *Science* **221**, 382-385 (1983).
111. W. Salem, B. Cellini, M. A. Frye, J. M. Mongeau, Fly eyes are not still: a motion illusion in *Drosophila* flight supports parallel visual processing. *J Exp Biol* **223**, (2020).
112. M. V. Srinivasan, S. W. Zhang, Visual motor computations in insects. *Annu Rev Neurosci* **27**, 679-696 (2004).
113. P. G. Clarke, I. M. Donaldson, D. Whitteridge, Binocular visual mechanisms in cortical areas I and II of the sheep. *J Physiol* **256**, 509-526 (1976).
114. G. F. Poggio, B. C. Motter, S. Squatrito, Y. Trotter, Responses of neurons in visual cortex (V1 and V2) of the alert macaque to dynamic random-dot stereograms. *Vision research* **25**, 397-406 (1985).
115. R. F. van der Willigen, B. J. Frost, H. Wagner, Stereoscopic depth perception in the owl. *Neuroreport* **9**, 1233-1237 (1998).
116. K. Y. Cheng, R. A. Colbath, M. A. Frye, Olfactory and neuromodulatory signals reverse visual object avoidance to approach in *Drosophila*. *Curr Biol* **29**, 2058-2065 (2019).
117. L. Liu, R. Wolf, R. Ernst, M. Heisenberg, Context generalization in *Drosophila* visual learning requires the mushroom bodies. *Nature* **400**, 753-756 (1999).
118. M. G. Burg, P. V. Sarthy, G. Koliantz, W. L. Pak, Genetic and molecular-identification of a *Drosophila* histidine-decarboxylase gene required in photoreceptor transmitter synthesis. *Embo J* **12**, 911-919 (1993).
119. J. Melzig *et al.*, Genetic depletion of histamine from the nervous system of *Drosophila* eliminates specific visual and mechanosensory behavior. *J Comp Physiol A* **179**, 763-773 (1996).

120. M. T. Pearn, L. L. Randall, R. D. Shortridge, M. G. Burg, W. L. Pak, Molecular, biochemical, and electrophysiological characterization of *Drosophila* norpA mutants. *J Biol Chem* **271**, 4937-4945 (1996).
121. T. Washburn, J. E. O'Tousa, Molecular defects in *Drosophila* rhodopsin mutants. *J Biol Chem* **264**, 15464-15466 (1989).
122. J. P. Kumar, D. F. Ready, Rhodopsin plays an essential structural role in *Drosophila* photoreceptor development. *Development* **121**, 4359-4370 (1995).
123. T. Wang, X. Wang, Q. Xie, C. Montell, The SOCS box protein STOPS is required for phototransduction through its effects on phospholipase C. *Neuron* **57**, 56-68 (2008).
124. J. Rister *et al.*, Dissection of the peripheral motion channel in the visual system of *Drosophila melanogaster*. *Neuron* **56**, 155-170 (2007).
125. K. G. Götz, Optomotor investigation of the visual-system of some eye mutations of the *Drosophila* fruit-fly. *Kybernetik* **2**, 77-91 (1964).
